# Supplementary material for: COS-triggered oxygen/sulfur exchange of isatins: chemoselective synthesis of functionalized isoindigos and spirothiopyrans via self-condensation and the thio-Diels–Alder reaction
Source: Royal Society of Chemistry journal article supplement (doi:10.1039/d1ob02157e), 2021-12-15
Supplement: d1ob02157e1.pdf [file d1ob02157e1.pdf]

## Supporting Information

for

### COS-triggered Oxygen/Sulfur Atom Exchange of Isatins: Chemoselective Synthesis of Functionalized Isoindigos and Spirothiopyrans via Self- condensation and Thio-Diels-Alder Reaction

Wei Chen, Hui Zhou,\* Bai-Hao Ren, Wei-Min Ren and Xiao-Bing Lu

[Email: zhouhui@dlut.edu.cn](mailto:zhouhui@dlut.edu.cn)

State Key Laboratory of Fine Chemicals, Dalian University of Technology, 116024 Dalian, China.

## Table of Contents

|                                                                                                                                                                                                                |     |
|----------------------------------------------------------------------------------------------------------------------------------------------------------------------------------------------------------------|-----|
| 1. General Procedure.....                                                                                                                                                                                      | S1  |
| 2. Synthetic procedure and characterization data for reaction substrate .....                                                                                                                                  | S1  |
| 3. COS-triggered Oxygen/Sulfur Atom Exchange of Isatins: Solvent-controlled Chemoselective Synthesis of Functionalized Isoindigos and Spirothiopyrans via Self-condensation and Thio-Diels-Alder Reaction..... | S3  |
| 4. Crystallography .....                                                                                                                                                                                       | S3  |
| 5. Mechanistic studies .....                                                                                                                                                                                   | S7  |
| 5.1 Control Experiments .....                                                                                                                                                                                  | S7  |
| 5.2 Detecting the interaction between DBU and COS .....                                                                                                                                                        | S7  |
| 5.2.1 The interaction were detected by means of In-situ FTIR.....                                                                                                                                              | S7  |
| 5.2.2 The interaction were detected by means of NMR control experiments .....                                                                                                                                  | S8  |
| 5.3 Detecting by-products experiments.....                                                                                                                                                                     | S8  |
| 5.3.1 Carbon dioxide tracking experiments by <sup>13</sup> C-NMR.....                                                                                                                                          | S8  |
| 5.3.2 Detecting Elemental sulfur experiments .....                                                                                                                                                             | S9  |
| 5.4 Trapping intermediate experiments.....                                                                                                                                                                     | S9  |
| 5.5 The synthesis of 3-thioisatin in-situ .....                                                                                                                                                                | S10 |
| 6. Self-condensation of isatin employing COS generated in-situ .....                                                                                                                                           | S10 |
| 7. Synthesis of isoindigo based polymers .....                                                                                                                                                                 | S11 |
| 7.1 Synthesis of isoindigo based polymer 9.....                                                                                                                                                                | S11 |
| 7.2 Synthesis of isoindigo based polymer 10.....                                                                                                                                                               | S12 |
| 8. Computational investigation of the reaction mechanism .....                                                                                                                                                 | S13 |
| 9. Characterization date of products.....                                                                                                                                                                      | S20 |
| 10. References.....                                                                                                                                                                                            | S33 |
| 11. NMR spectra .....                                                                                                                                                                                          | S34 |
| 12. Cartesian coordinates of intermediates .....                                                                                                                                                               | S96 |

## 1. General Procedure

Unless otherwise stated, all manipulations of oxygen- and/or moisture-sensitive materials were performed in a glove box or using standard Schlenk techniques under a dry nitrogen or argon atmosphere. THPE-Bn-<sup>13</sup>COS adducts and BIG were prepared according to previous procedures [1-2]. Solvents were dried by standard methods and distilled under argon. CH<sub>3</sub>CN was distilled with P<sub>2</sub>O<sub>5</sub>. THF and toluene were distilled from sodium/benzophenone. DMSO and CH<sub>2</sub>Cl<sub>2</sub> were distilled with CaH<sub>2</sub>. All of the solvents were stored over 4A molecular sieves before used. NMR spectra were recorded on Varian Inova 400 and 500 MHz, Bruker 500 and 600 MHz spectrometers in CDCl<sub>3</sub> or DMSO and chemical shifts are expressed in parts per million ( $\delta$ , ppm). Proton chemical shifts are referenced to 7.26 ppm (CHCl<sub>3</sub>) or 2.50 ppm (DMSO) and carbon chemical shifts are referenced to 77.16 ppm (CHCl<sub>3</sub>) or 39.5 ppm (DMSO). High resolution mass spectra (HRMS) were recorded on a Q-TOF mass spectrometry equipped with Z-spray ionization source. Infrared spectra (IR) were measured using a Nicolet NEXUS FT-IR spectrophotometer. COS (99.9%), and other commercially available chemicals were used without further purification.

## 2. Synthetic procedure and characterization data for reaction substrate

**Representative experimental procedure:** Most of the functionalized isatins were synthesized following the synthetic procedure reported by Mironova, E, V [3]. Conjugated diene were prepared according to the literature procedure [4].

**Procedure for preparation of *N*-(2-ethylhexyl)-5-bromoisatin:** In a glove box, 5-bromoisatin (1.12 g, 5 mmol), NaH (0.18 g, 7.5 mmol), and DMF (10 mL) were introduced into a 50 mL Schlenk flask. The reaction was stirred at 0 °C for 0.5 h, then 2-ethylhexyl bromide (1.15 g, 6 mmol) was added to the reaction mixture and stirred continuously at 25°C for 16 h. The reaction was quenched with saturated salt water and the organic phase was extracted with dichloromethane. The organic layer was dried over anhydrous Na<sub>2</sub>SO<sub>4</sub>. After removal of the solvent, the residue was purified by using silica gel column chromatography (petroleum ether/EtOAc 5/1) to give the desired product as red oil liquid (1.52 g, 4.5 mmol) in 90% yield. **<sup>1</sup>H NMR** (400 MHz, CDCl<sub>3</sub>)  $\delta$  7.67 (dd,  $J$  = 7.0, 2.0 Hz, 2H), 6.83 – 6.72 (m, 1H), 3.65 – 3.53 (m, 2H), 1.77 (dt,  $J$  = 12.4, 6.0 Hz, 1H), 1.40 – 1.23 (m, 8H), 0.97 – 0.83 (m, 6H); **<sup>13</sup>C NMR** (101 MHz, CDCl<sub>3</sub>)  $\delta$  182.5, 157.8, 150.2, 140.6, 128.1, 118.8, 116.4, 112.2, 44.6, 37.4, 30.6, 28.6, 24.0, 23.0, 14.1, 10.6; **IR** (neat cm<sup>-1</sup>): 2959, 1740, 1606, 1470, 1438, 1331, 1259, 1184, 1119, 817, 708; **HRMS**(ESI): calcd. for C<sub>16</sub>H<sub>21</sub>BrNO<sub>2</sub> [M+H]<sup>+</sup>  $m/z$  338.0756, found: 338.0751.

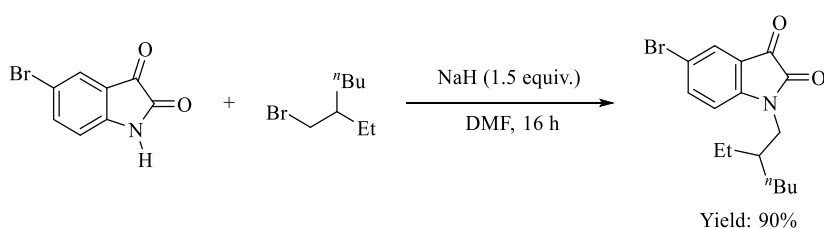

**Procedure for preparation of **1i**:** In a glove box, the *N*-(2-ethylhexyl)-5-bromoisatin (0.41 g 1.16 mmol), (4,4,5,5-tetramethyl-1,3,2-dioxaborolan-2-yl)benzene (0.36 g, 1.74 mmol), potassium acetate (0.34 g, 3.48 mmol) and Pd(PPh<sub>3</sub>)<sub>2</sub>Cl<sub>2</sub> (0.084 g, 0.12 mmol) were suspended in dry 1,4-dioxane (10 mL) and the reaction mixture was stirred at 80 °C for 16 h. The reaction mixture was filtered and the filtrate was dried in vacuum. Then the crude product was purified by column chromatography on silica gel (petroleum ether/EtOAc = 10/1) to give the desired product (0.35 g, 1.05 mmol) as red oil liquid in 90% yield. **<sup>1</sup>H NMR** (600 MHz, CDCl<sub>3</sub>)  $\delta$  7.84 – 7.78 (m, 2H), 7.53 (d,  $J$  = 7.4 Hz, 2H), 7.46 (t,  $J$  = 7.4 Hz, 2H), 7.38 (t,  $J$  = 7.3 Hz, 1H), 6.95 (d,  $J$  = 8.1 Hz, 1H), 3.70 – 3.58 (m, 2H), 1.89 – 1.80 (m, 1H), 1.41 – 1.26 (m, 8H), 0.93 (dt,  $J$  = 12.0, 6.7 Hz, 6H); **<sup>13</sup>C NMR** (101 MHz, CDCl<sub>3</sub>)  $\delta$  183.7, 158.6, 150.5, 139.0, 137.1, 136.8, 129.1, 127.9, 126.5, 123.8, 118.1, 110.8,

44.5, 37.5, 30.7, 28.6, 24.0, 23.1, 14.1, 10.6; **IR** (neat  $\text{cm}^{-1}$ ): 2959, 1739, 1619, 1594, 1476, 1462, 1333, 1179, 1120, 827, 761; **HRMS**(ESI): calcd. for  $\text{C}_{22}\text{H}_{26}\text{NO}_2$   $[\text{M}+\text{H}]^+$   $m/z$  336.1964, found: 336.1967.

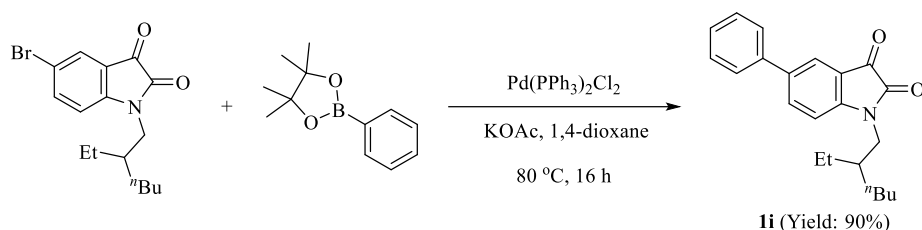

**Procedure for preparation of 1j:** In a glove box, the *N*-(2-ethylhexyl)-5-bromoisatin (0.49 g, 1.47 mmol), bis(pinacolato)diboron ( $\text{Bpin}$ )<sub>2</sub> (0.56 g, 2.21 mmol), potassium acetate (0.43 g, 4.41 mmol) and  $\text{Pd}(\text{PPh}_3)_2\text{Cl}_2$  (0.1 g, 0.147 mmol) were suspended in dry 1,4-dioxane (10 mL) and the reaction mixture was stirred at 80 °C for 16 h. The reaction mixture was filtered and the filtrate was dried in vacuum. Then the crude product was purified by column chromatography on silica gel (petroleum ether/EtOAc = 10/1) to give the desired product as red oil liquid (0.5 g, 1.34 mmol) in 91% yield. **<sup>1</sup>H NMR** (400 MHz,  $\text{DMSO}-d_6$ )  $\delta$  7.48 (dd,  $J$  = 16.2, 2.0 Hz, 2H), 7.35 (t,  $J$  = 6.1 Hz, 4H), 7.29 (dt,  $J$  = 8.5, 4.1 Hz, 1H), 5.14 (d,  $J$  = 15.3 Hz, 2H), 2.15 (s, 3H); **<sup>13</sup>C NMR** (101 MHz,  $\text{DMSO}-d_6$ )  $\delta$  182.3, 159.3, 146.9, 139.9, 137.1, 128.7, 127.4, 127.2, 125.7, 123.9, 121.8, 120.2, 44.5, 17.4; **IR** (neat  $\text{cm}^{-1}$ ): 2920, 1728, 1593, 1452, 1466, 1402, 1331, 1239, 1157, 1085, 891, 751; **HRMS**(ESI): calcd. for  $\text{C}_{16}\text{H}_{13}\text{ClNO}_2$   $[\text{M}+\text{H}]^+$   $m/z$  386.0635, found: 386.0630

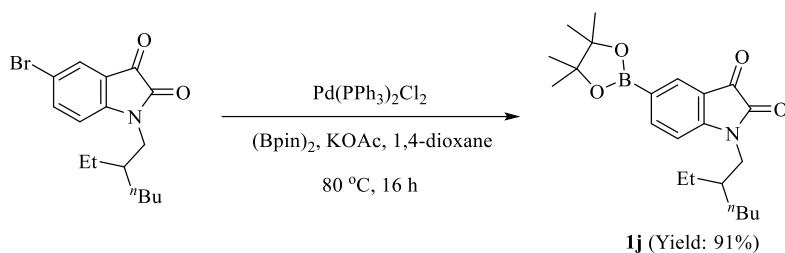

**Procedure for preparation of 1o:** In a glove box, 5-chloro-7-methylisatin (0.30g, 1.54 mmol), NaH (0.055g, 2.31 mmol) and DMF (10 mL) were introduced into a 50 mL Schlenk flask. The reaction was stirred at 0 °C for 0.5 h, then benzyl bromide (0.32 g, 1.85 mmol) was added to the reaction mixture and stirred continuously at 25 °C for 16 h. The reaction was quenched with water and the organic phase was extracted with dichloromethane. The organic layer was dried over anhydrous  $\text{Na}_2\text{SO}_4$ . After removal of the solvent, the residue was purified by using silica gel column chromatography (dichloromethane) to give the desired product as red solid (0.40 g, 1.4 mmol) in 91% yield. **<sup>1</sup>H NMR** (400 MHz,  $\text{DMSO}-d_6$ )  $\delta$  7.48 (dd,  $J$  = 16.2, 2.0 Hz, 2H), 7.35 (t,  $J$  = 6.1 Hz, 4H), 7.29 (dt,  $J$  = 8.5, 4.1 Hz, 1H), 5.14 (d,  $J$  = 15.3 Hz, 2H), 2.15 (s, 3H); **<sup>13</sup>C NMR** (101 MHz,  $\text{DMSO}-d_6$ )  $\delta$  182.3, 159.3, 146.9, 139.9, 137.1, 128.7, 127.4, 127.2, 125.7, 123.9, 121.8, 120.2, 44.5, 17.4; **IR** (neat  $\text{cm}^{-1}$ ): 2920, 1728, 1593, 1452, 1466, 1402, 1331, 1239, 1157, 1085, 891, 751; **HRMS**(ESI): calcd. for  $\text{C}_{16}\text{H}_{13}\text{ClNO}_2$   $[\text{M}+\text{H}]^+$   $m/z$  286.0635, found: 286.0630

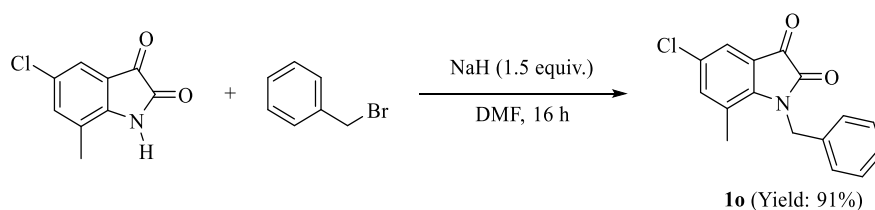

**Procedure for preparation of isatin-based monomer:** Under argon atmosphere, *N*-(2-ethylhexyl)-5-bromoisatin (0.77 g, 2.3 mmol), 2,2'-benzene-1,4-diylbis(4,4,5,5-tetramethyl-1,3,2-dioxaborolane) (0.53 g, 1.6 mmol),  $\text{Pd}(\text{OAc})_2$  (0.051 mg, 0.23 mmol), S-Phos (0.16 g, 0.46 mmol),  $\text{K}_2\text{CO}_3$  (1.5 g, 11.5 mmol) and KOAc (0.56 g, 5.75 mmol) were mixed and dissolved in

degassed THF (40 mL) in a Schlenk tube. The reaction was stirred at 65 °C for 16 h. After removal of the solvent, the residue was purified by recrystallization in hexane and DCM to give the desired product as red solid (200 mg, 0.34 mmol) in 15% yield. **<sup>1</sup>H NMR** (400 MHz, CDCl<sub>3</sub>) δ 7.91 – 7.82 (m, 4H), 7.63 (s, 4H), 6.98 (d, J = 8.2 Hz, 2H), 3.71 – 3.60 (m, 4H), 1.90 – 1.81 (m, 2H), 1.45 – 1.30 (m, 16H), 0.93 (dt, J = 13.9, 7.3 Hz, 12H); **<sup>13</sup>C NMR** (101 MHz, CDCl<sub>3</sub>) δ 183.8, 158.7, 150.9, 138.6, 136.7, 136.3, 127.3, 123.8, 118.3, 111.0, 44.7, 37.6, 30.8, 28.8, 24.1, 23.2, 14.2, 10.7; **IR** (neat cm<sup>-1</sup>): 2958, 2851, 1736, 1619, 1592, 1476, 1381, 1338, 813, 722; **HRMS**(ESI): calcd. for C<sub>38</sub>H<sub>45</sub>N<sub>2</sub>O<sub>4</sub> [M+H]<sup>+</sup> m/z 593.3379, found: 593.3369

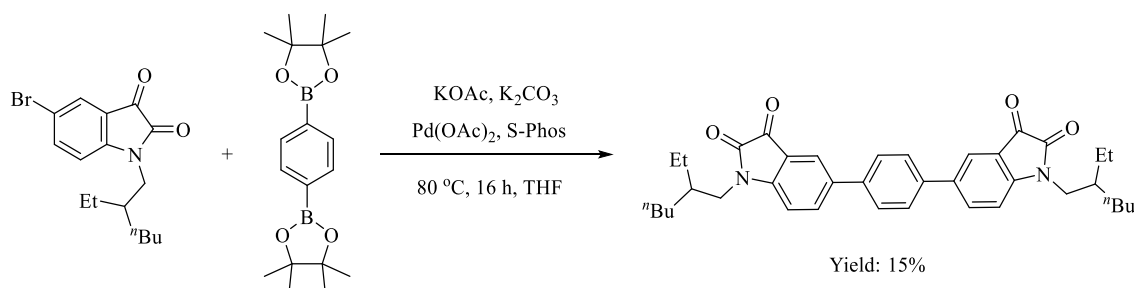

### 3. COS-triggered Oxygen/Sulfur Atom Exchange of Isatins: Solvent-controlled Chemoselective Synthesis of Functionalized Isoindigos and Spirothiopyrans via Self-condensation and Thio-Diels-Alder Reaction

**Representative experimental procedure of functionalized isoindigos:** In a glove box, a 10 mL oven-dried autoclave containing a stir bar was charged with isatin (0.5 mmol), DBU (0.05 mmol, 10 mmol%) and CH<sub>3</sub>CN (2 mL). After purging the autoclave with COS three times. The sealed autoclave was pressurized to 0.8 MPa with COS. The reaction mixture was stirred at 25 °C for 24 h, then the remaining COS in the autoclave was vented slowly. The crude reaction mixture was purified by washing in dichloromethane and methanol or column chromatography on silica gel (petroleum ether/EtOAc: 10/1-5/1) to give desired products.

**Representative experimental procedure of spirothiopyrans (4aa-4pf):** In a glove box, a 10 mL oven-dried autoclave containing a stir bar was charged with isatin (0.5 mmol), conjugated diene (1.0 mmol), DBU (0.05 mmol, 10 mmol%) and DMSO (2.0 mL). After purging the autoclave with COS three times. The sealed autoclave was pressurized to 0.8 MPa with COS. The reaction mixture was stirred at 25 °C for 24 h, then the remaining COS in the autoclave was vented slowly. The crude reaction mixture was purified by column chromatography on silica gel (petroleum ether/EtOAc: 10/1-3/2) to give the desired product.

### 4. Crystallography

Single crystals of isoindigo **3v**, **3z**, and **elemental sulfur** suitable for X-ray structural analysis were obtained from chloroform or dichloromethane solution at room temperature. Diffraction data were collected at 273 K on a Bruker SMART-CCD diffractometer using graphite-monochromated Mo K $\alpha$  radiation ( $\lambda = 0.71073$  Å). The structures were solved by direct methods and refined by full-matrix least squares on F<sup>2</sup> [5]. All nonhydrogen atoms were refined anisotropically, and the hydrogen atoms were included in idealized positions. All calculations were performed using the SHELXTL crystallographic software packages [6]. CCDC: 1992590(**3v**), CCDC: 1992591(**3z**), CCDC: 1992592 (**elemental sulfur**) contain supplementary crystallographic data for this paper. These data can be obtained free of charge from The Cambridge Crystallographic Data Centre via [www.ccdc.cam.ac.uk/data\\_request/cif](http://www.ccdc.cam.ac.uk/data_request/cif)

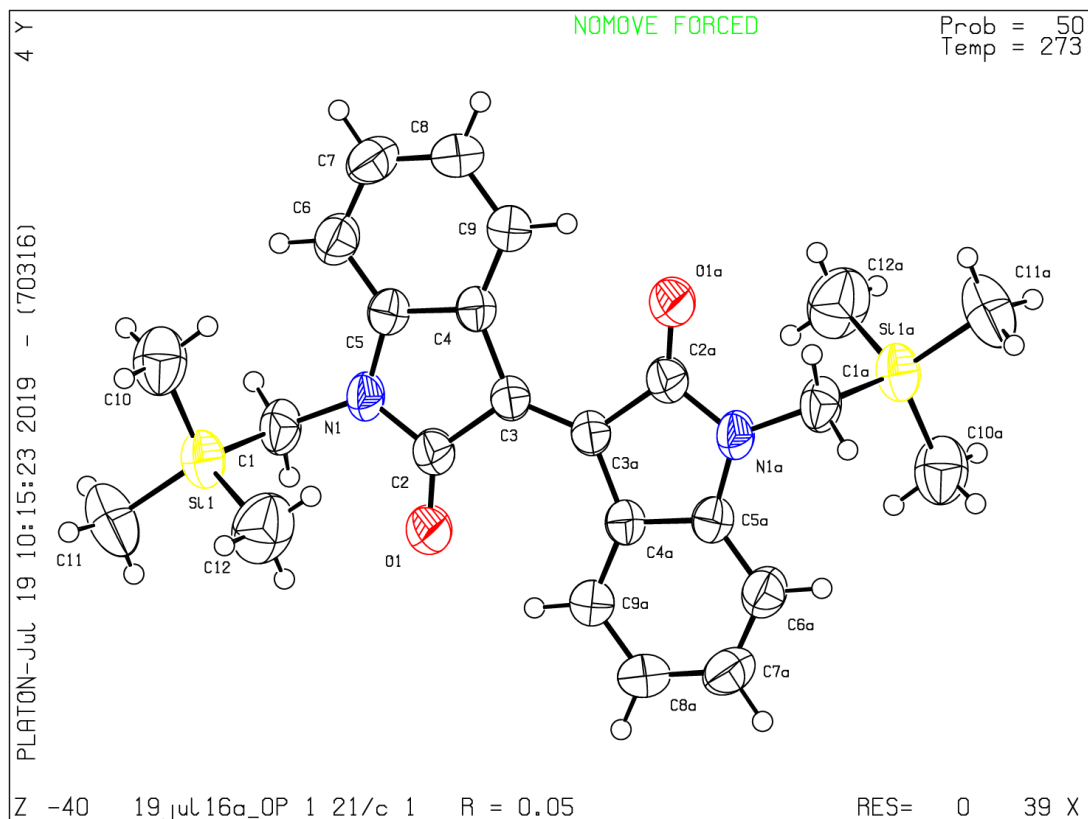

**Figure S1.** ORTEP Single Crystal X-Ray Diffraction of **3v**

**Table S1.** Crystal data and structure refinement for **3v**

|                        |                                            |                                 |               |
|------------------------|--------------------------------------------|---------------------------------|---------------|
| Bond precision:        | C-C = 0.0036 Å                             | Wavelength=0.71073              |               |
| Cell:                  | a=12.0825(8)                               | b=6.2924(4)                     | c=15.8782(10) |
|                        | alpha=90                                   | beta=90.701(4)                  | gamma=90      |
| Temperature:           | 273 K                                      |                                 |               |
|                        | Calculated                                 | Reported                        |               |
| Volume                 | 1207.10(13)                                | 1207.10(13)                     |               |
| Space group            | P 21/c                                     | P 1 21/c 1                      |               |
| Hall group             | -P 2ybc                                    | -P 2ybc                         |               |
| Moiety formula         | C24 H30 N2 O2 Si2                          | C24 H30 N2 O2 Si2               |               |
| Sum formula            | C24 H30 N2 O2 Si2                          | C24 H30 N2 O2 Si2               |               |
| Mr                     | 434.68                                     | 434.68                          |               |
| Dx, g cm <sup>-3</sup> | 1.196                                      | 1.196                           |               |
| Z                      | 2                                          | 2                               |               |
| Mu (mm <sup>-1</sup> ) | 0.169                                      | 0.169                           |               |
| F000                   | 464.0                                      | 464.0                           |               |
| F000'                  | 464.48                                     |                                 |               |
| h, k, lmax             | 15, 8, 20                                  | 15, 7, 20                       |               |
| Nref                   | 2765                                       | 2703                            |               |
| Tmin, Tmax             |                                            | 0.613, 0.746                    |               |
| Tmin'                  |                                            |                                 |               |
| Correction method=     | # Reported T Limits: Tmin=0.613 Tmax=0.746 |                                 |               |
| AbsCorr =              | MULTI-SCAN                                 |                                 |               |
| Data completeness=     | 0.978                                      | Theta(max)= 27.461              |               |
| R(reflections)=        | 0.0537( 1314)                              | wR2(reflections)= 0.1466( 2703) |               |
| S =                    | 0.970                                      | Npar= 139                       |               |

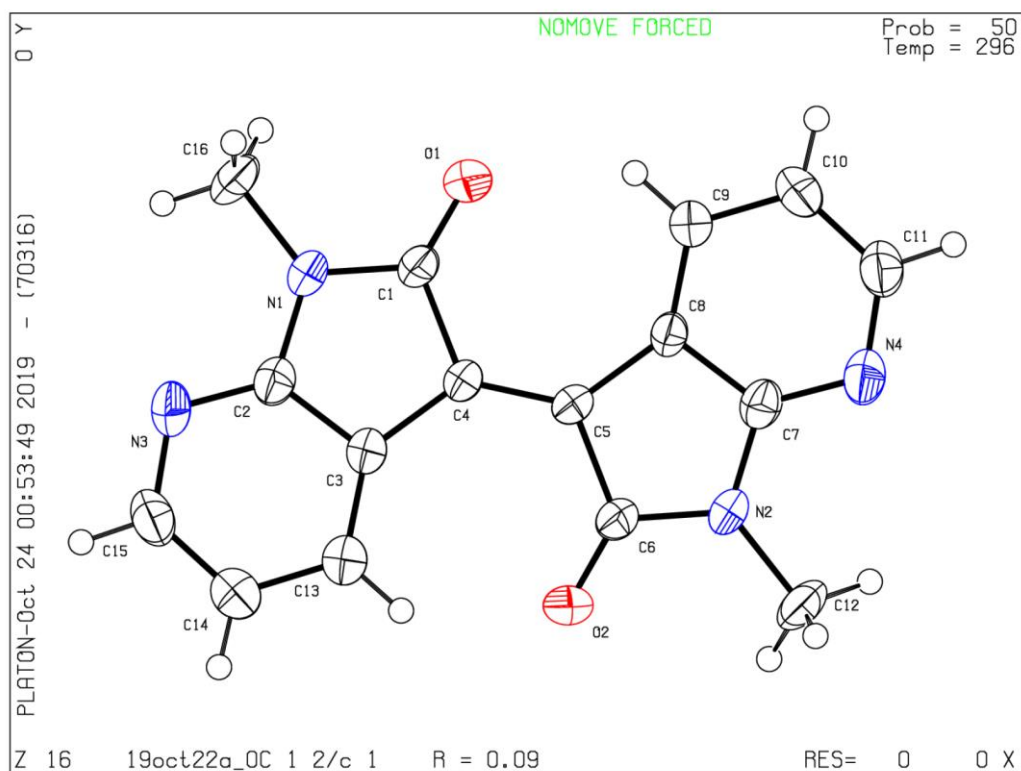

**Figure S2.** ORTEP Single Crystal X-Ray Diffraction of **3z**

**Table S2.** Crystal data and structure refinement for **3z**

|                        |                                            |                                 |             |
|------------------------|--------------------------------------------|---------------------------------|-------------|
| Bond precision:        | C-C = 0.0052 Å                             | Wavelength=0.71073              |             |
| Cell:                  | a=22.659(3)                                | b=8.6862(14)                    | c=15.721(3) |
|                        | alpha=90                                   | beta=121.417(9)                 | gamma=90    |
| Temperature:           | 296 K                                      |                                 |             |
| Volume                 | Calculated                                 | Reported                        |             |
|                        | 2640.6(8)                                  | 2640.6(8)                       |             |
| Space group            | C 2/c                                      | C 1 2/c 1                       |             |
| Hall group             | -C 2yc                                     | -C 2yc                          |             |
| Moiety formula         | C16 H12 N4 O2                              | C16 H12 N4 O2                   |             |
| Sum formula            | C16 H12 N4 O2                              | C16 H12 N4 O2                   |             |
| Mr                     | 292.30                                     | 292.30                          |             |
| Dx, g cm <sup>-3</sup> | 1.470                                      | 1.470                           |             |
| Z                      | 8                                          | 8                               |             |
| Mu (mm <sup>-1</sup> ) | 0.101                                      | 0.101                           |             |
| F000                   | 1216.0                                     | 1216.0                          |             |
| F000'                  | 1216.50                                    |                                 |             |
| h, k, lmax             | 30, 11, 21                                 | 30, 11, 21                      |             |
| Nref                   | 3408                                       | 3348                            |             |
| Tmin, Tmax             |                                            | 0.475, 0.746                    |             |
| Tmin'                  |                                            |                                 |             |
| Correction method=     | # Reported T Limits: Tmin=0.475 Tmax=0.746 |                                 |             |
| AbsCorr =              | MULTI-SCAN                                 |                                 |             |
| Data completeness=     | 0.982                                      | Theta(max)= 28.653              |             |
| R(reflections)=        | 0.0945( 2140)                              | wR2(reflections)= 0.2786( 3348) |             |
| S =                    | 1.074                                      | Npar= 203                       |             |

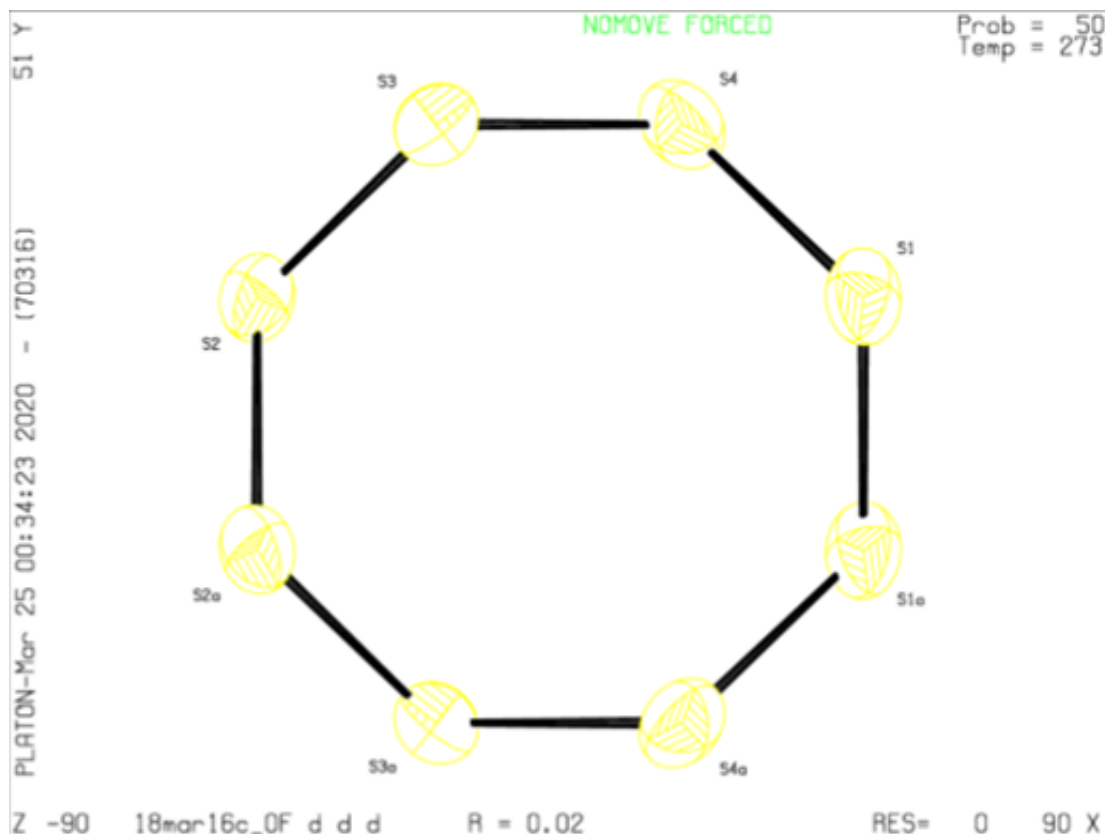

**Figure S3.** ORTEP Single Crystal X-Ray Diffraction of **elemental sulfur**

**Table S3.** Crystal data and structure refinement for **elemental sulfur**

|                                                               |                 |                                  |              |
|---------------------------------------------------------------|-----------------|----------------------------------|--------------|
| Bond precision:                                               | S- S = 0.0006 Å | Wavelength=0.71073               |              |
| Cell:                                                         | a=10.4753 (14)  | b=12.8737 (18)                   | c=24.510 (3) |
|                                                               | alpha=90        | beta=90                          | gamma=90     |
| Temperature:                                                  | 273 K           |                                  |              |
| Volume                                                        | Calculated      | Reported                         |              |
|                                                               | 3305.3 (8)      | 3305.3 (8)                       |              |
| Space group                                                   | F d d d         | F d d d                          |              |
| Hall group                                                    | -F 2uv 2vw      | -F 2uv 2vw                       |              |
| Moiety formula                                                | S8              | S8                               |              |
| Sum formula                                                   | S8              | S8                               |              |
| Mr                                                            | 256.48          | 256.48                           |              |
| Dx, g cm <sup>-3</sup>                                        | 2.062           | 2.062                            |              |
| Z                                                             | 16              | 16                               |              |
| Mu (mm <sup>-1</sup> )                                        | 2.060           | 2.060                            |              |
| F000                                                          | 2048.0          | 2048.0                           |              |
| F000'                                                         | 2063.99         |                                  |              |
| h, k, lmax                                                    | 15, 18, 35      | 15, 18, 34                       |              |
| Nref                                                          | 1336            | 1276                             |              |
| Tmin, Tmax                                                    | 0.814, 0.814    | 0.451, 0.746                     |              |
| Tmin'                                                         | 0.814           |                                  |              |
| Correction method= # Reported T Limits: Tmin=0.451 Tmax=0.746 |                 |                                  |              |
| AbsCorr = MULTI-SCAN                                          |                 |                                  |              |
| Data completeness=                                            | 0.955           | Theta(max)= 31.132               |              |
| R(reflections)=                                               | 0.0200 ( 1153)  | wR2(reflections)= 0.0499 ( 1276) |              |
| S =                                                           | 1.062           | Npar= 38                         |              |



## 5. Mechanistic studies

### 5.1 Control Experiments

In order to clarify the detailed reaction mechanism, several control experiments were designed and performed. As summarized in Scheme S1, in the absence of DBU or COS, and no desired product **3a** was observed (Scheme S1. I and II). Moreover, when changing COS to CO<sub>2</sub> or CS<sub>2</sub> under standard conditions, **3a** still was not observed and only the starting materials **1a** were retained, which indicates that CO<sub>2</sub> or CS<sub>2</sub> could not trigger this process (Scheme S1. III and IV).

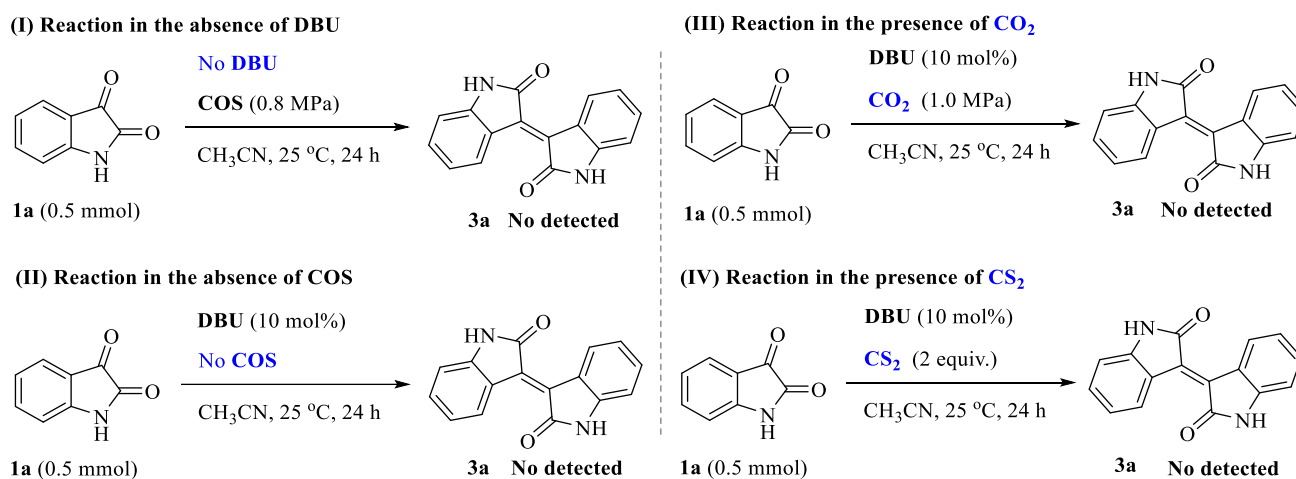

Scheme S1. Control experiments

### 5.2 Detecting the interaction between DBU and COS

#### 5.2.1 The interaction were detected by means of In-situ FTIR

To disclose the interaction between DBU and COS, the following experiments were designed and conducted: In a glove box, a 25 mL flask, equipped with a magnetic stir bar, was charged with DBU (0.5 mmol) and CH<sub>3</sub>CN (2.0 mL), then In-situ FTIR probe was equipped to check the IR signals. As shown in Figure S4, the absorption peak at 1617 cm<sup>-1</sup> is attributable to the C=N band of DBU. When introducing free COS (1.0 atm), the carbonyl peak of DBU-COS adduct at 1650 cm<sup>-1</sup> gradually increased.

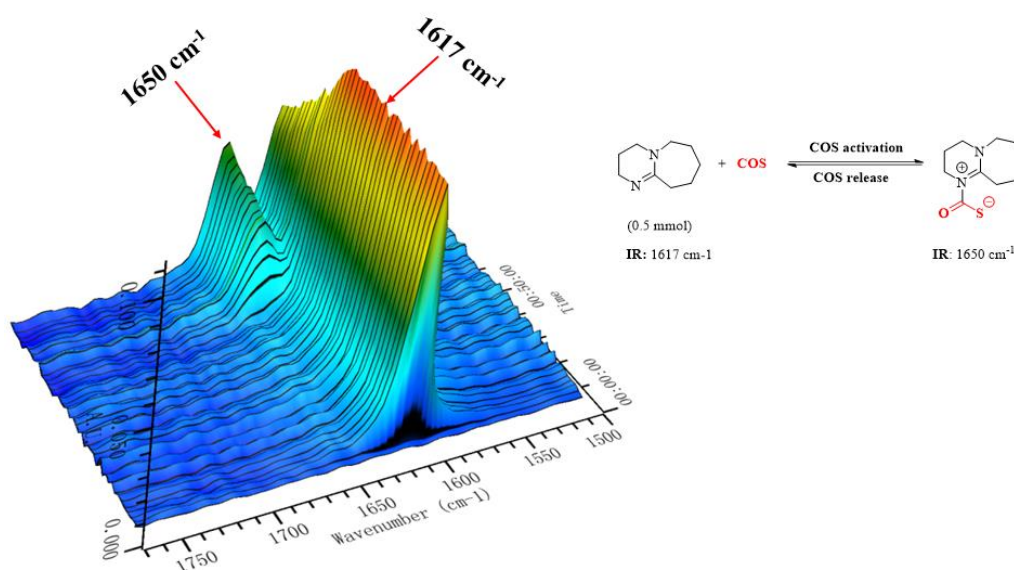

Figure S4. FTIR spectra of DBU with COS in CH<sub>3</sub>CN

## 5.2.2 The interaction were detected by means of NMR control experiments

In a glove box, a dried NMR tube was charged with DBU (0.2 mmol) and CD<sub>3</sub>CN (0.5 mL), which was characterized by <sup>13</sup>C-NMR spectroscopy (Figure S5. I). In the presence of COS atmosphere, a dried NMR tube was charged with DBU (0.2 mmol) and CD<sub>3</sub>CN (0.5 mL), which was characterized by <sup>13</sup>C-NMR spectroscopy (Figure S5. II). Compared with the NMR data, it is obvious that when introducing COS atmosphere, a new signal at 210.1 ppm were observed from <sup>13</sup>C-NMR spectrum (Figure S5), which is attributable to in-situ generated DBU-COS adduct.

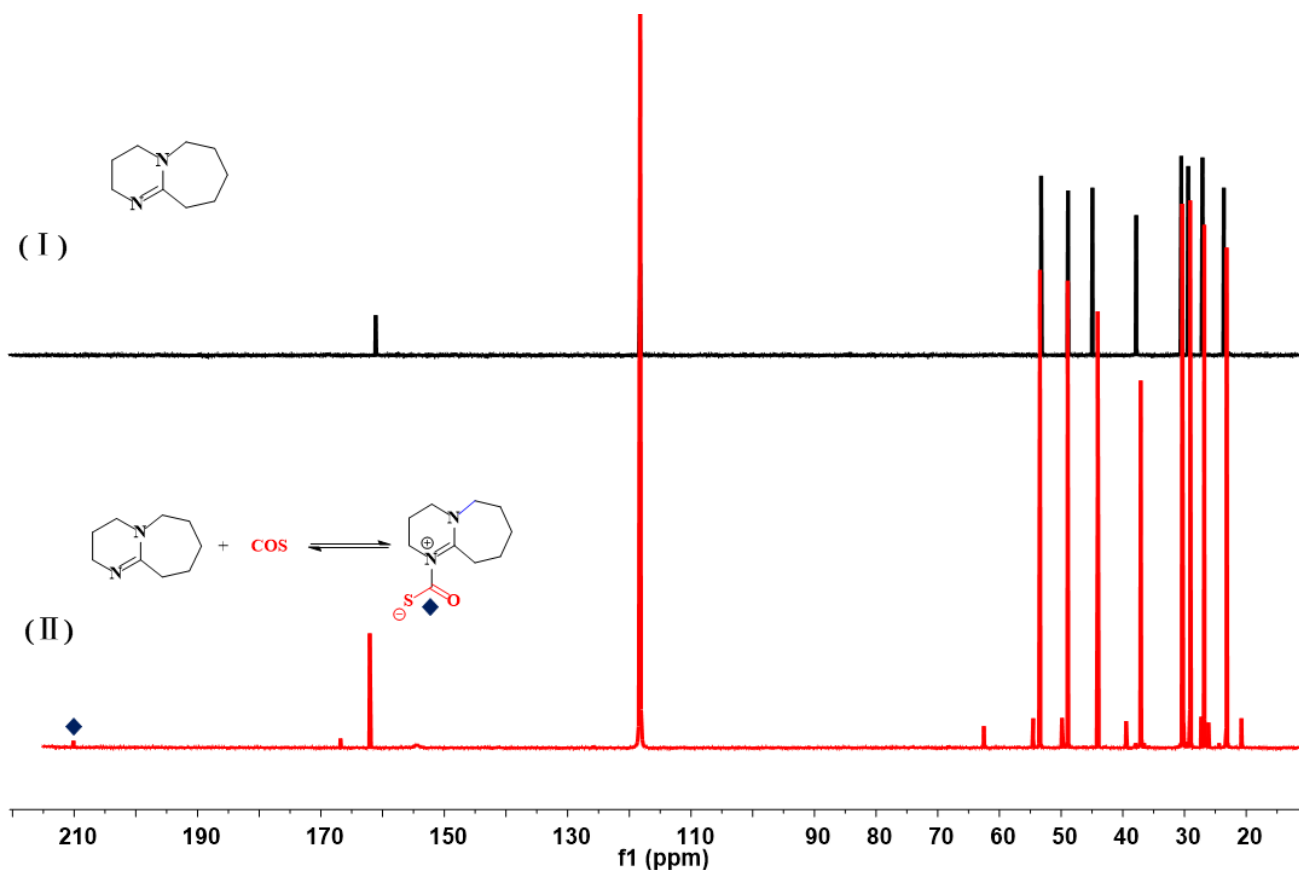

Figure S5. <sup>13</sup>C NMR comparison spectra to determine the interaction between DBU and COS

## 5.3 Detecting by-products experiments

### 5.3.1 Carbon dioxide tracking experiments by <sup>13</sup>C-NMR

The <sup>13</sup>C-NMR spectra of **1p**, CO<sub>2</sub> and **3p** in CD<sub>3</sub>CN were characterized, respectively, as shown in Figure S6. The resonance of free CO<sub>2</sub> appears at 125.8 ppm (Figure S6, II). Due to the poor solubility of **3p** in CD<sub>3</sub>CN, the resulting signals are very weak (Figure S6, III).

In the glove box, a dried NMR tube was charged with **1p** (0.25 mmol), THPE-Bn-<sup>13</sup>COS (0.25 mmol) and CD<sub>3</sub>CN (0.5 mL). After being sealed by NMR cap, the NMR tube was left for 24 h at room temperature. During this process, the insoluble red solid was gradually generated, which was later proved to be isoindigo **3p**. The reaction mixture in NMR tube was further characterized by <sup>13</sup>C-NMR spectroscopy (Figure S6. IV), and a strong <sup>13</sup>C-NMR signal at around 125.8 ppm was appeared. Through vacuum pumping and N<sub>2</sub> backfilling process, the reaction mixture was once again characterized by <sup>13</sup>C-NMR spectroscopy, and the <sup>13</sup>C-NMR signal at around 125.8 ppm was disappeared completely (Figure S6. V), which indicated that CO<sub>2</sub> as by-product occurred during this process.

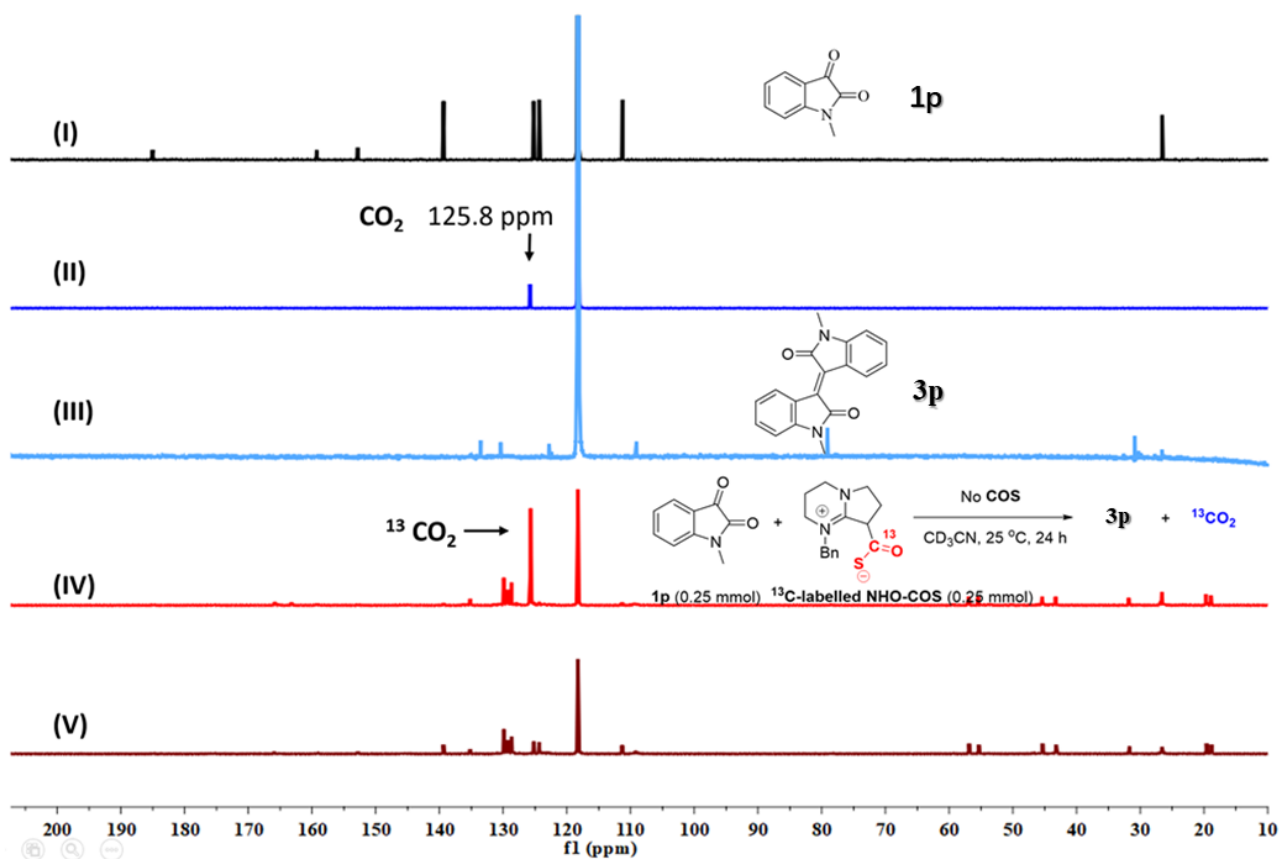

Figure S6.  $^{13}\text{C}$  NMR comparison spectra to determine the presence of  $\text{CO}_2$

### 5.3.2 Detecting Elemental sulfur experiments

In the glove box, a 10 mL oven-dried autoclave containing a stir bar was charged with isatin **1a** (1.5 mmol), DBU (0.15 mmol, 10 mmol%) and  $\text{CH}_3\text{CN}$  (2.0 mL). After purging the autoclave with COS three times. The sealed autoclave was pressurized to 0.8 MPa with COS. The reaction mixture was stirred at 25 °C for 24 h, then the remaining COS in the autoclave was vented slowly. The crude reaction mixture was purified by column chromatography on silica gel (dichloromethane) to give isoindigo (0.73 mmol, 191 mg) in 98% yield and elemental sulfur (1.42 mmol, 45.6 mg) in 95% yield.

### 5.4 Trapping intermediate experiments

In the glove box, a 10 mL oven-dried autoclave containing a stir bar was charged with **1p** (1.0 mmol), DBU (0.1 mmol, 10 mmol%), 2,3-dimethyl-1,3-butadiene (2.0 mmol) and  $\text{CH}_3\text{CN}$  (2.0 mL). After purging the autoclave with COS three times. The sealed autoclave was pressurized to 0.8 MPa with COS. The reaction mixture was stirred at 25 °C for 24 h, then the remaining COS in the autoclave was vented slowly. The crude reaction mixture was purified by column chromatography on silica gel (petroleum ether/EtOAc: 5/1 and hexane) to give the corresponding cyclized product **4pa** (26 mg, 6% yield) [7], the 1,2-dithia-4,5-dimethyl-4-cyclohexene **6** (10.2 mg, 7% yield) and 1,2,3,4-tetrathia-6,7-dimethyl-6-cyclooctene **7** (10.5 mg, 5% yield) [8-9].

### (I) Detection of intermediates using diene

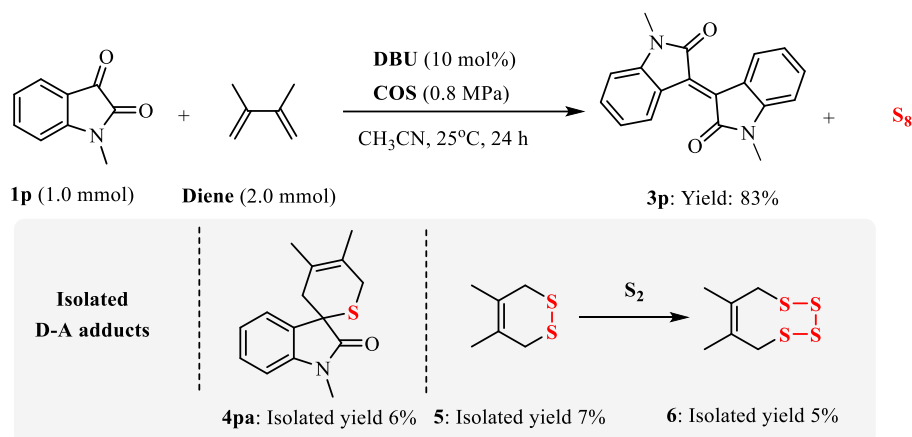

Figure S7. The capture of intermediate

**1,2-dithia-4,5-dimethyl-4-cyclohexene (6).** Colorless oil liquid, 10.2 mg, yield: 7%. <sup>1</sup>H NMR (400 MHz, CDCl<sub>3</sub>) δ 3.21 (s, 4H), 1.76 (s, 6H); <sup>13</sup>C NMR (101 MHz, CDCl<sub>3</sub>) δ 125.1, 34.1, 20.8. All the resonances in <sup>1</sup>H and <sup>13</sup>C NMR spectra were in good agreement with literature values [8].

**1,2,3,4-tetrathia-6,7-dimethyl-6-cyclooctene (7).** White solid, 10.5 mg, yield: 5%. <sup>1</sup>H NMR (600 MHz, CDCl<sub>3</sub>) δ 3.65 (s, 4H), 1.80 (s, 6H). <sup>13</sup>C NMR (151 MHz, CDCl<sub>3</sub>) δ 130.6, 43.0, 18.3. All the resonances in <sup>1</sup>H and <sup>13</sup>C NMR spectra were in good agreement with literature values [8].

### 5.5 The synthesis of 3-thioisatin in-situ

*N*-Chlorosulfenylsuccinimide (SuccNSCl) was firstly prepared according to previous literature [10].

Under N<sub>2</sub> atmosphere, oxindole (**8**) (133 mg, 1.0 mmol) and triethylamine (0.13 mL, 1.0 mmol) were dissolved in dry CH<sub>2</sub>Cl<sub>2</sub> (3.0 mL) at room temperature. Then SuccNSCl (176 mg, 1.1 mmol in 3.0 mL CH<sub>2</sub>Cl<sub>2</sub>) was added dropwise over 15 min at -78 °C. Pyridine (1.7 mL, 3 mmol) was added slowly into the reaction mixture at room temperature for 10 minutes to obtain the CH<sub>2</sub>Cl<sub>2</sub> solution of 3-thioisatin **5**, which was not purified and used directly for the subsequent transformation.

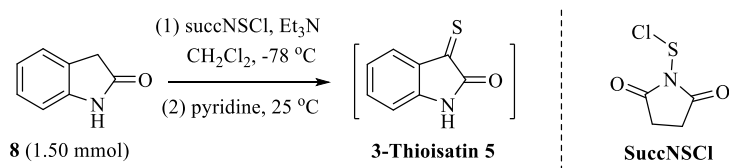

Figure S8. The synthesis of 3-thioisatin **5** in-situ

### 6. Self-condensation of isatin employing COS generated in-situ

In the glove box, a 10 mL oven-dried autoclave containing a stir bar was charged with elemental sulfur (320 mg, 10 mmol), NaH (96 mg, 4.0 mmol), THF (2.0 mL) and a 2 mL tube containing a stir bar was charged with **1a** (18.4 mg, 0.125 mmol), DBU (3.8 mg, 0.025 mmol) and THF (0.5 mL). Then the tube was transferred into autoclave, as shown in Figure S9. After purging the autoclave with CO three times, the sealed autoclave was pressurized to 2.0 MPa with CO. The reaction mixture was stirred at 80 °C for 24 h, then the remaining CO was vented slowly. The crude reaction mixture was purified by column chromatography on silica gel (dichloromethane) to give desired product **3a** (0.06 mmol, 18 mg) in 92% yield.

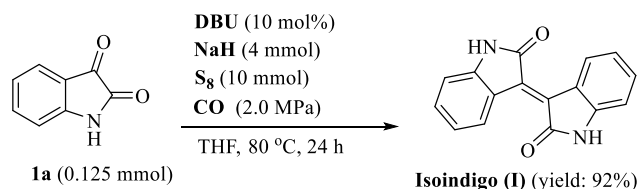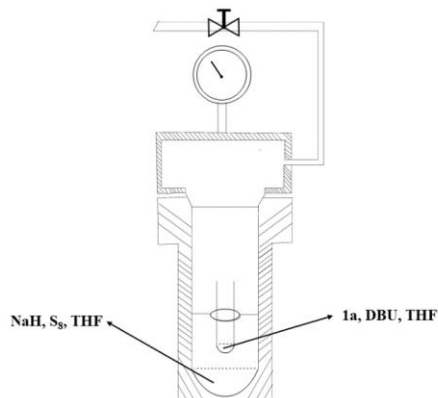

**Figure S9.** Experimental set-up for the formation of COS.

## 7. Synthesis of isoindigo based polymers

### 7.1 Synthesis of isoindigo based polymer **9**

In the glove box, a 10 mL oven-dried autoclave containing a stir bar was charged with isatin-based monomer (120 mg, 0.2 mmol), DBU (30.6 mg, 0.2 mmol) and THF (1.0 mL). After purging the autoclave with COS three times, the sealed autoclave was pressurized to 0.8 MPa with COS. The reaction mixture was stirred at 60 °C for 96 h, then the remaining COS in the autoclave was vented slowly. The crude polymer was purified using Soxhlet extraction with methanol as washing and extracting solvent to give desired product as dark purple solid in 96% yield. GPC (DMF):  $M_n$   $9.70 \times 10^4$  g/mol, PDI 2.20.

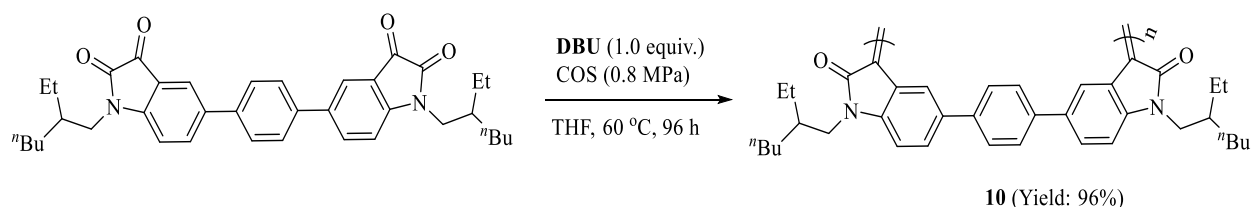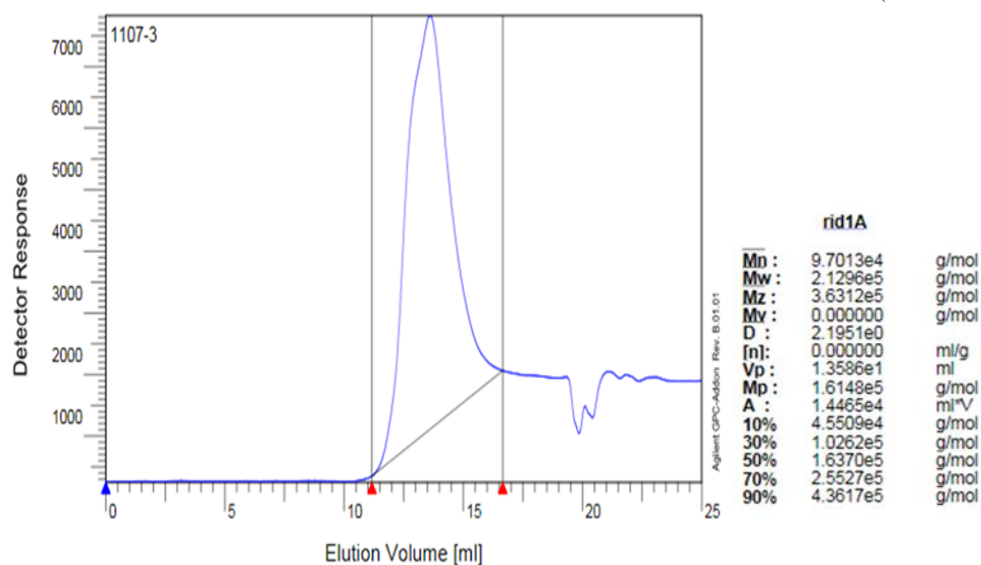

**Figure S10.** Gel-Permeation Chromatogram Analysis of **10**

## 7.2 Synthesis of isoindigo based polymer **11**

In a glove box, a 10 mL oven-dried autoclave containing a stir bar was charged with isatin-based monomer (120 mg, 0.2 mmol), DBU (6.12 mg, 0.04 mmol) and THF (1.0 mL). After purging the autoclave with COS three times, the sealed autoclave was pressurized to 0.8 MPa with COS. The reaction mixture was stirred at 60 °C for 96 h, then the remaining COS in the autoclave was vented slowly. The crude polymer purified by Soxhlet extraction with methanol as washing and extracting solvent to give desired product as dark purple solid in 98% yield. GPC (THF):  $M_n$   $6.11 \times 10^3$  g/mol, PDI 1.62.

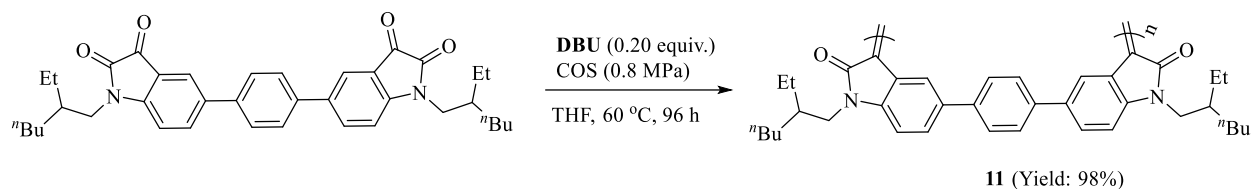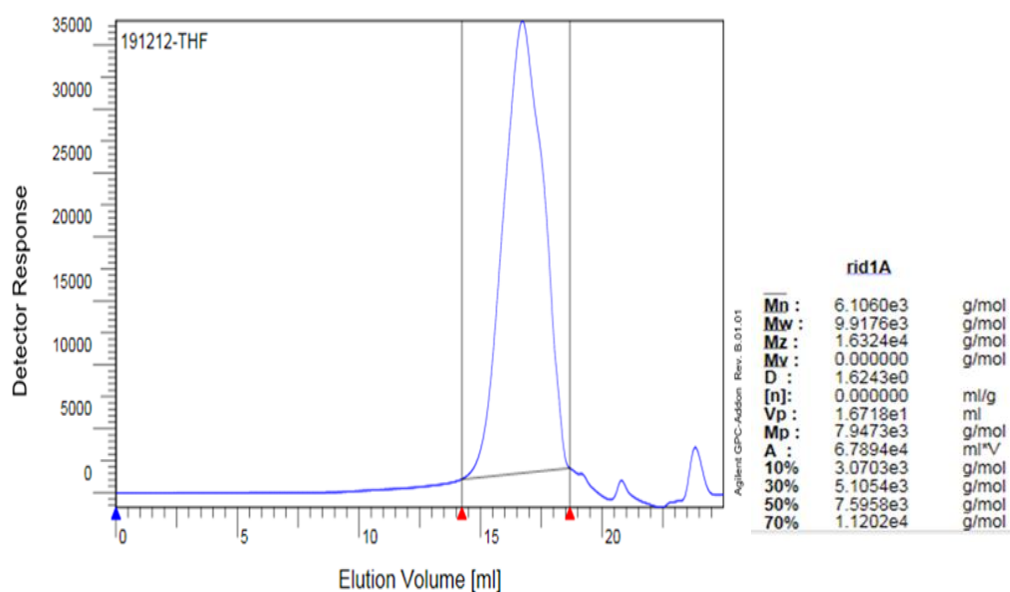

**Figure S11.** Gel-Permeation Chromatogram Analysis of **11**

## 8. Computational investigation of the reaction mechanism

Control experiments showed that 3-thioisatin is a key intermediate for this process. Both DBU and DBU-COS adducts have a certain catalytic activity and might promote the reaction. In terms of this fact, three possible pathways were proposed for the O/S exchange process (Figure S12). In **Pathway 1-1** (Figure S12), DBU acts as nucleophile reagent to activate isatin and further react with free COS to generate thiocarbonate intermediate **A**. Then, the intramolecular nucleophilic cyclization might take place to generate a four-membered cyclic thiocarbonate intermediate **B**. Finally, the selective ring-opening of intermediate **B** via DBU-involved aminolysis process and subsequent rearrangement process allow the production of 3-thioisatin. Alternatively, the four-membered cyclic thiocarbonate intermediate **B** could be generated in **Pathway 1-2** (Figure S12) employing DBU-COS adduct as nucleophile reagent. Meanwhile, a six-membered cyclic intermediate **D** could be selectively formed via the cyclization of intermediate **C** from the thiocarbonate anion to the C=O bond (**Pathway 1-3**, Figure S12). Then, 3-thioisatin could be generated by subsequent rearrangement process.

In order to illustrate the process of O/S exchange, DFT calculation was performed with Gaussian 16 [11]. All geometries of the reactants, products, intermediates (**INT**), and transition states (**TS**) involved in this mechanistic study were fully optimized in CH<sub>3</sub>CN solvent (experimentally used) with the continuum solvation model (SMD) at the M06-2X/6-31(d,p) level of theory. To improve the accuracy of the energy, the single-point energy of each optimized structure and transition state was calculated at the M06-2X (SMD, CH<sub>3</sub>CN)/ 6-311++g(d,p) level.

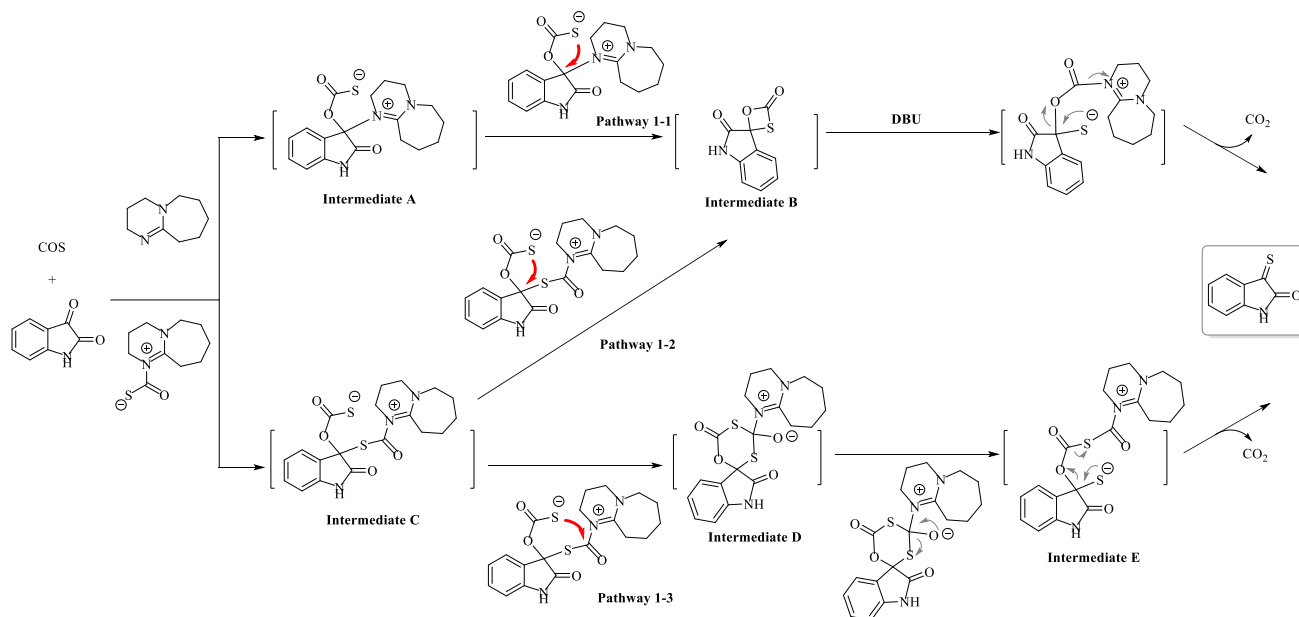

**Figure S12.** Proposed mechanism for the O/S exchange process.

**Pathway 1-1:** The computed potential energy surface of **Pathway 1-1** is presented in [Figure S13](#). Firstly, DBU and free COS could synergistically activate isatin in the transition state **TS1-2** (4.6 kcal/mol), leading to the formation of intermediate **INT2** (-11.1 kcal/mol). Furthermore, the intramolecular nucleophilic cyclization of **INT2** via **TS2-3** produces a four-membered cyclic thiocarbonate **INT3** and releases DBU. Subsequently, the aminolysis process of resultant **INT3** by DBU takes place at **TS3-4** (11.0 kcal/mol), and the intermediate **INT4** (-12.1 kcal/mol) is formed. Finally, the zwitterionic intermediate **INT4** undergoes a rearrangement reaction (**TS4-S-isatin**) to generate 3-thioisatin and release the unstable DBU-CO<sub>2</sub> adduct. The overall process of O/S exchange is exothermic, and **TS2-3** is the highest stationary point with an energy barrier of 31.5 kcal/mol.

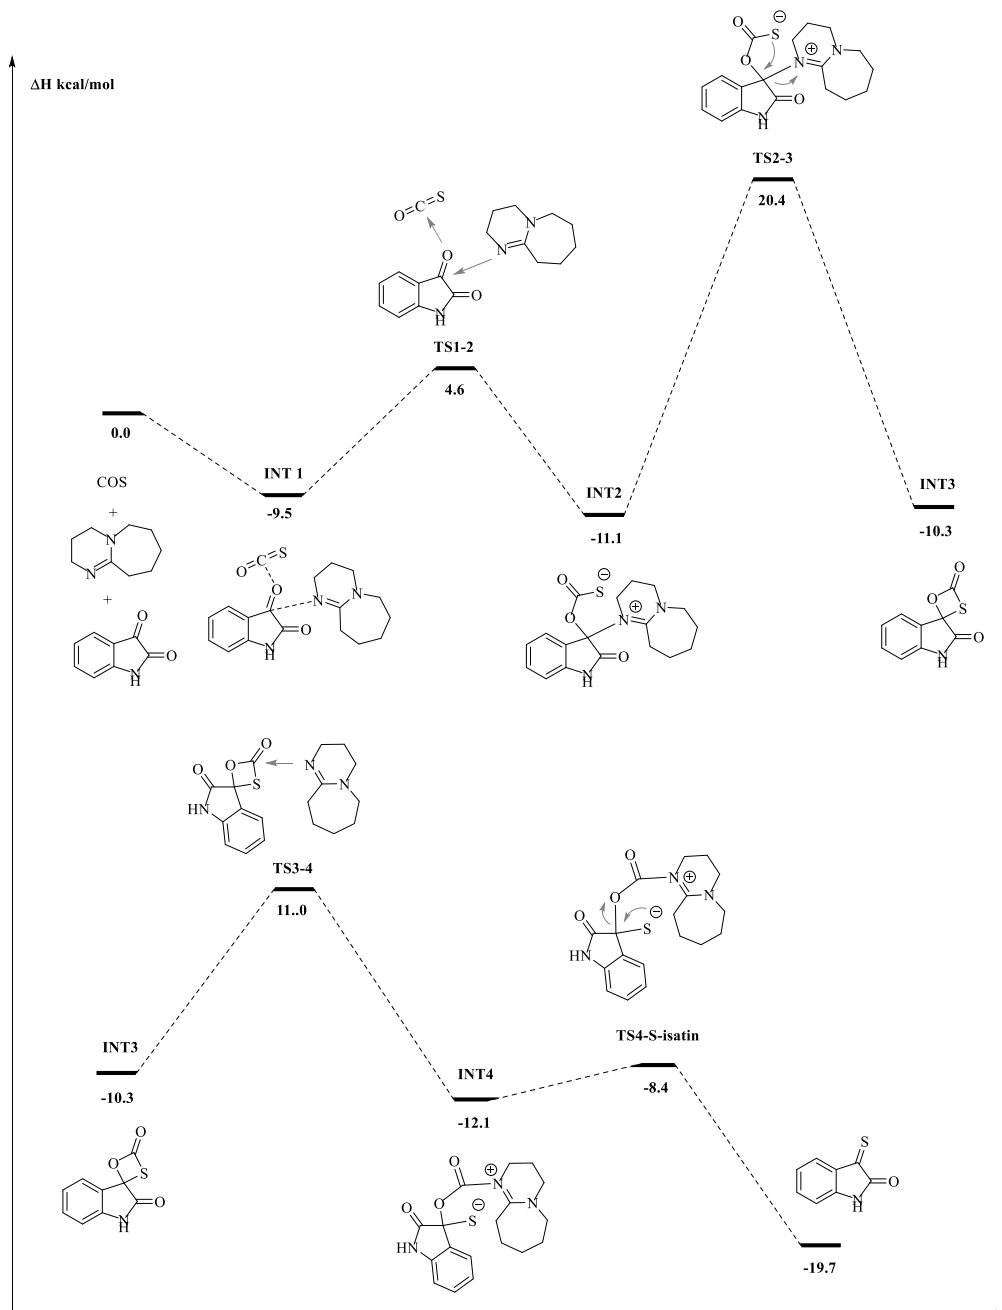

**Figure S13.** DBU-involved O/S exchange process (**Pathway 1-1**)



**Pathway 1-2:** On the other hand, the computed potential energy surface of **Pathway 1-2** is presented in **Figure S14**. Firstly, DBU-COS adduct and another free COS could synergistically activate isatin in the transition state **TS5-6** (4.9 kcal/mol), leading to the formation of intermediate **INT6**. Then, **INT6** can be ready to undergo an intramolecular nucleophilic cyclization from thiocarbonate anion to C-3 position of isatin with the associated energy of 7.9 kcal/mol (**TS6-3**), thus giving a four-membered cyclic thiocarbonate intermediate **INT3** and releasing the DBU-COS adduct. The subsequent reactions are the same as **Pathway 1-1**. Noting that the overall process of O/S exchange is exothermic by 19.7 kcal/mol and the nucleophilic ring opening of intermediate **INT3** is the rate determining step with an energy barrier of 28.5 kcal/mol.

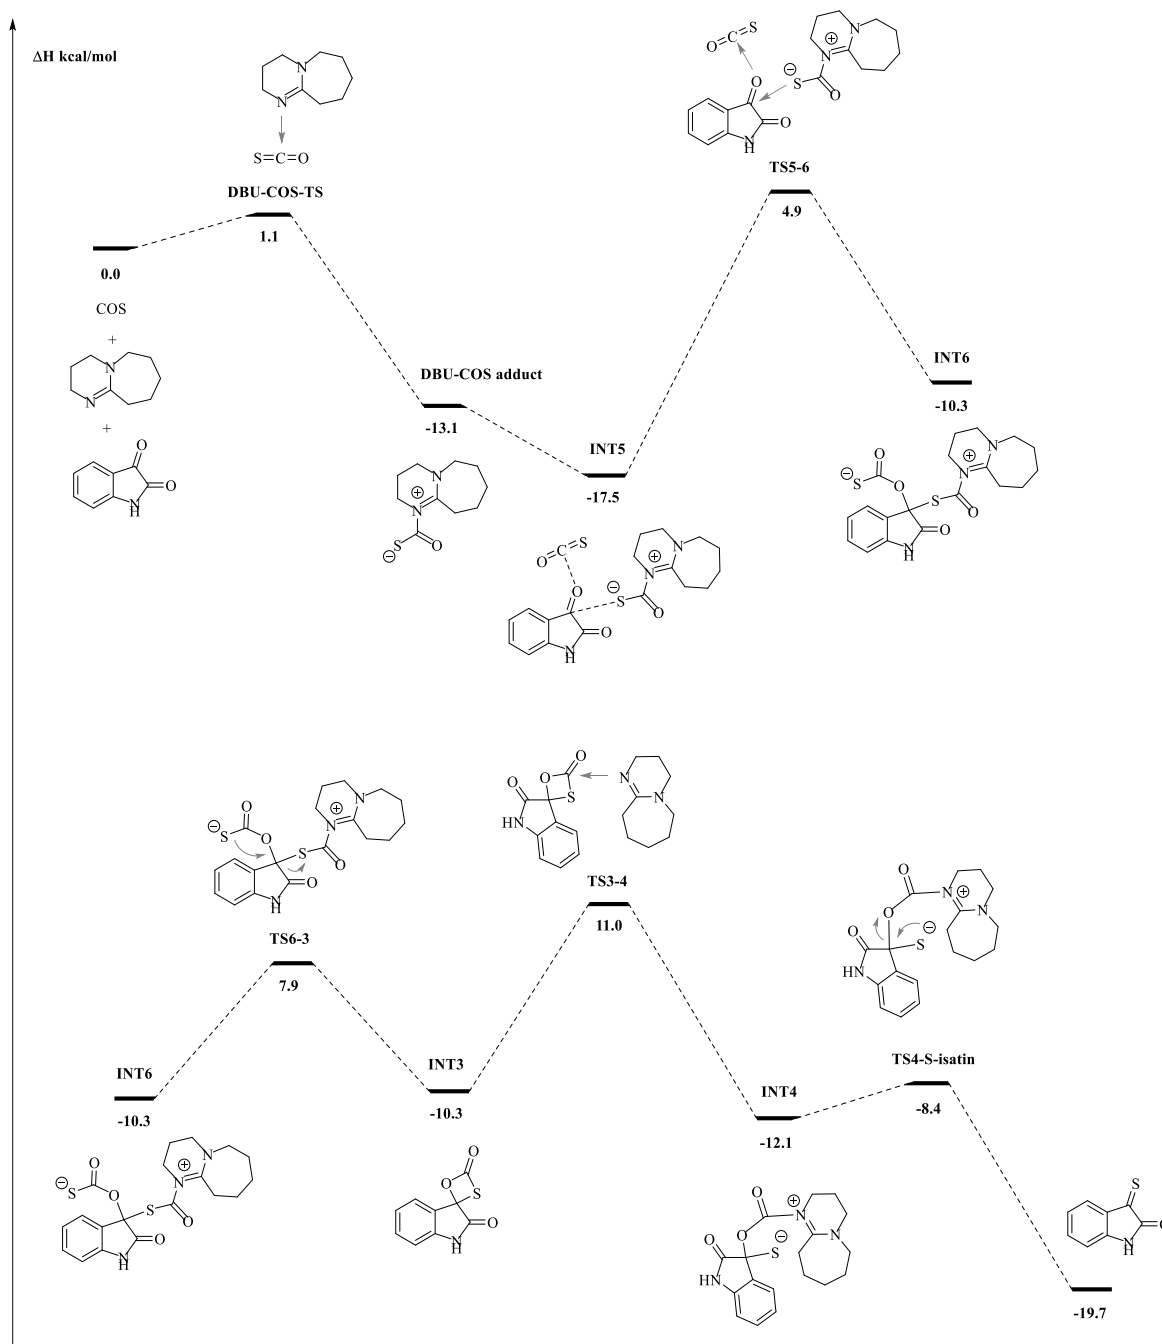

**Figure S14.** DBU-COS adduct-involved O/S exchange process (**Pathway 1-2**)

**Pathway 1-3:** In addition, another intramolecular cyclization process of thiocarbonate **INT 8** were computationally examined (Figure S15). The intramolecular nucleophilic addition from the thiocarboxylate anion to C=O bond takes place via **TS8-9** (8.9 kcal/mol) to give a tetrahedral intermediate **INT 9**. The tetrahedral intermediate **INT 9** also could experience a C-S bond cleavage **TS 9-10** (8.4 kcal/mol) to selectively form zwitterionic **INT10**, which further undergoes a rearrangement reaction (**TS10-S-isatin**: 1.5 kcal/mol) to form 3-thioisatin and release DBU-COS adduct, and free CO<sub>2</sub> (Figure S15). Through the detailed mechanistic studies, we observed that this is the lowest energy pathway for O/S exchange process in Figure S15, and the nucleophilic attack on C=O bond of **INT8** bond is the rate determining step with an energy barrier of 25.8 kcal/mol.

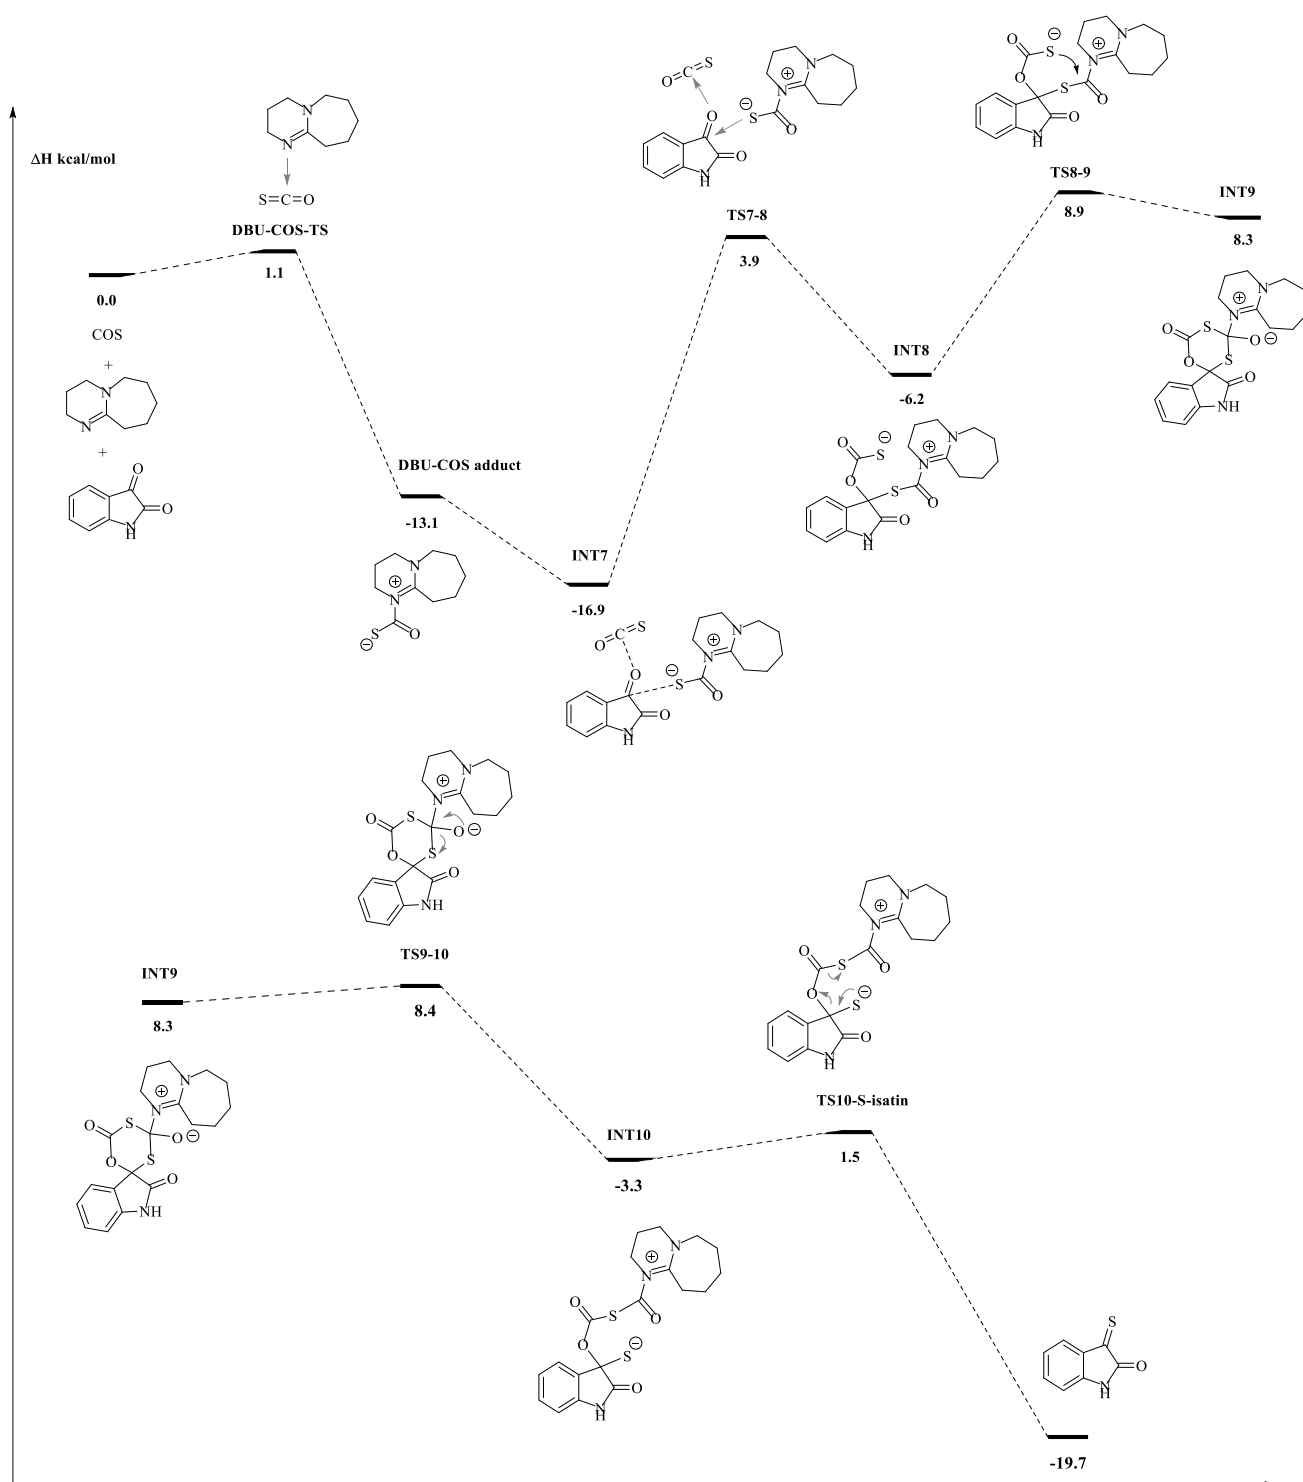

Figure S15. DBU-COS adduct-involved O/S exchange process (Pathway 1-3)

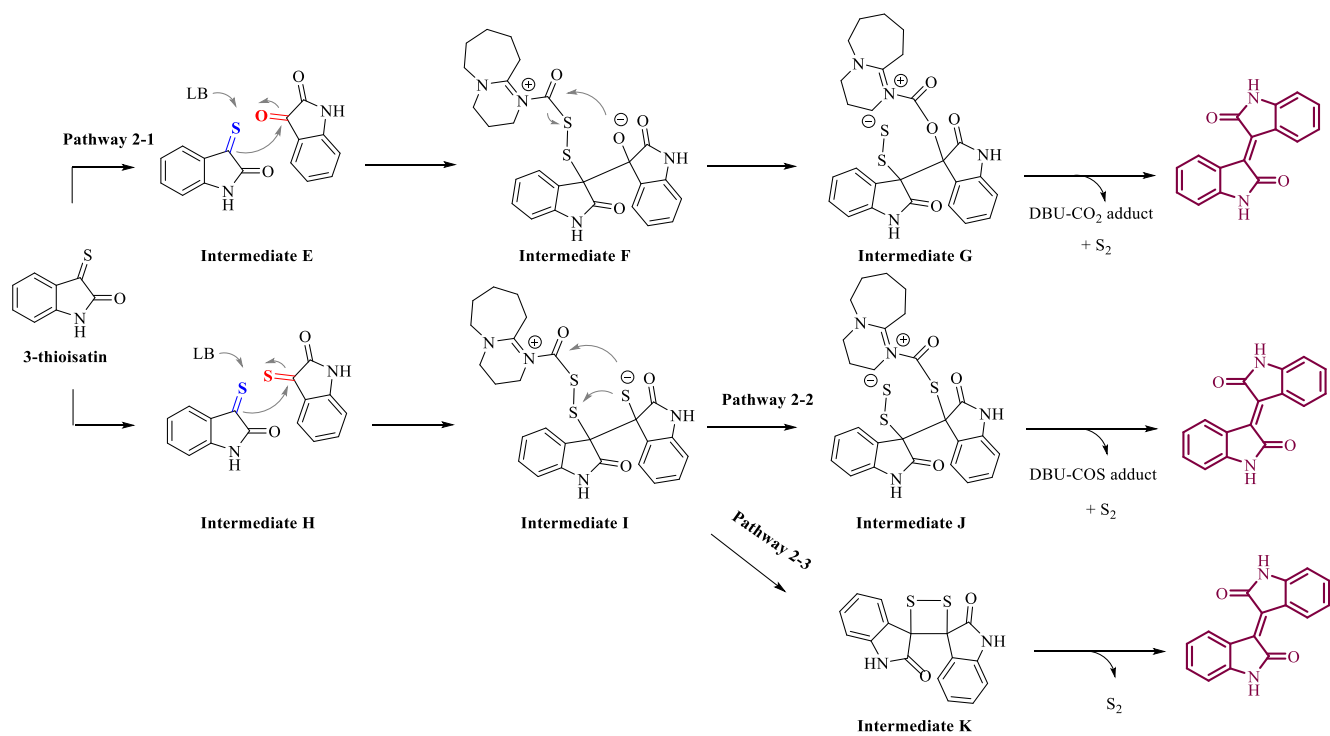

**Figure S16.** Proposed mechanism for the synthesis of isoindigo from 3-thioisatin

As shown in **Figure S16**, three proposed mechanisms for the formation of isoindigo from 3-thioisatin were proposed. As seen from **Pathway 2-1** in **Figure S16**, thiophilic addition to a thiocarbonyl group of 3-thioisatin by DBU-COS adduct could take place firstly to form a carbanion, which further goes through a nucleophilic attack on the carbonyl carbon atom of isatin to generate intermediate **F**. Then intermediate **F** undergoes intramolecular transesterification to generate intermediate **G**. Finally, DBU-CO<sub>2</sub> adduct and diatomic sulfur (S<sub>2</sub>) are eliminated respectively to afford isoindigo.

In addition, the carboanion generated from thiophilic addition of DBU-COS adduct with 3-thioisatin, also could attack the carbon atom of thiocarbonyl group of another 3-thioisatin to form intermediate **I**. There are two possible pathways for the formation of isoindigo from intermediate **I**. In pathway **2-2** (**Figure S17**), intermediate **I** goes through intramolecular transesterification and elimination process to generate isoindigo (similar to **Pathway 2-1**).

In **Pathway 2-3**, an intramolecular ring-closing reaction could proceed from intermediate **I** to afford 1,2-dithietane intermediate **K**. According to reported literatures, 1,2-dithietane derivatives could spontaneously extrude the S<sub>2</sub> fragment under high temperature condition or photochemical conditions, to construct carbon-carbon double bond, thus forming corresponding isoindigo [9].

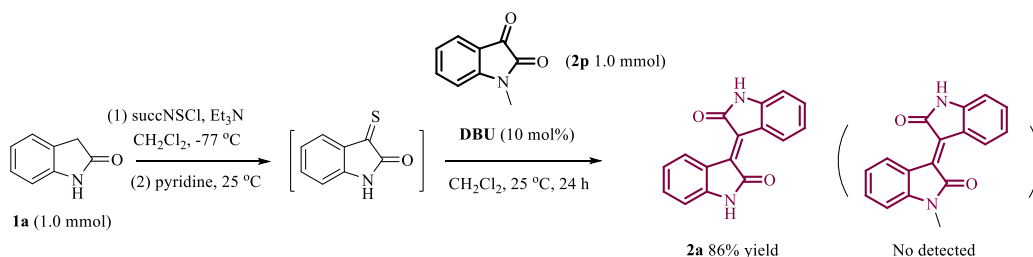

When isatin **1p** was added into the CH<sub>2</sub>Cl<sub>2</sub> solution of 3-thioisatin in the presence of DBU (10 mol%) [10], only **2a** was obtained in 86% yield. Unsymmetrical **Meisoindigo** was not detected. Based on the results, **Pathway 2-1** could be completely ruled out. Furthermore, **Pathway 2-2** and **2-3** were investigated by DFT calculations.

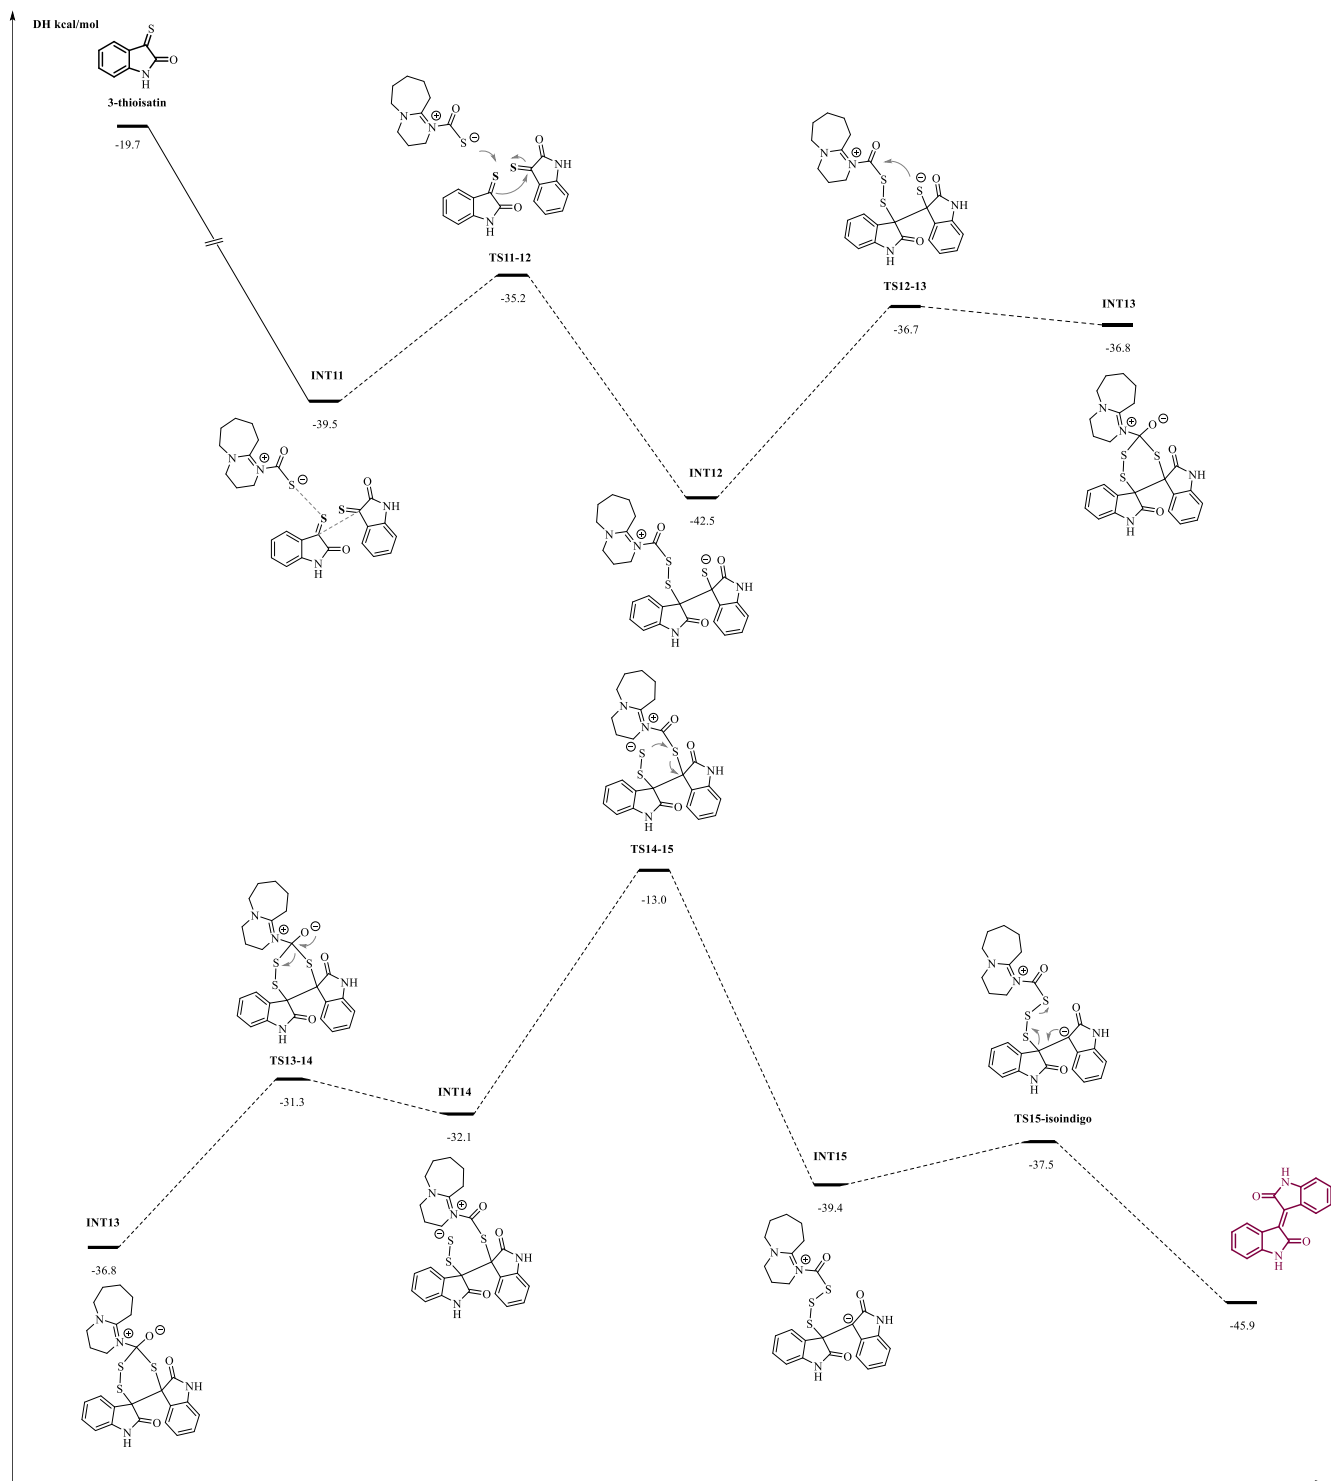

**Figure S17.** DBU-COS adduct-involved self-condensation of thioisatin (**Pathway 2-2**)

After the formation of 3-thioisatin, DBU-COS adduct further complex with two 3-thioisatins to form **INT 11**, as shown in [Figure S17](#). Then **INT11** can traverse **TS11-12** (-35.2 kcal/mol) with an energy barrier of 4.3 kcal/mol to generate **INT 12**. The intramolecular nucleophilic cyclization of **INT 12** could take place via **TS12-13** (-36.7 kcal/mol) to generate a cyclic tetrahedral **INT 13**. Furthermore, **INT 13** could break down via transition state **TS13-14** (-31.3 kcal/mol) to generate **INT 14**, which further undergoes a rearrangement (**TS14-15**, -13.0 kcal/mol) with an energy barrier of 29.5 kcal/mol to form **INT 15**. Finally, the  $S_2$  fragment was ejected from **INT 15** via **TS 15-isoindigo** (-37.5 kcal/mol), to generate isoindigo and release DBU-COS adduct for the next catalytic cycle.

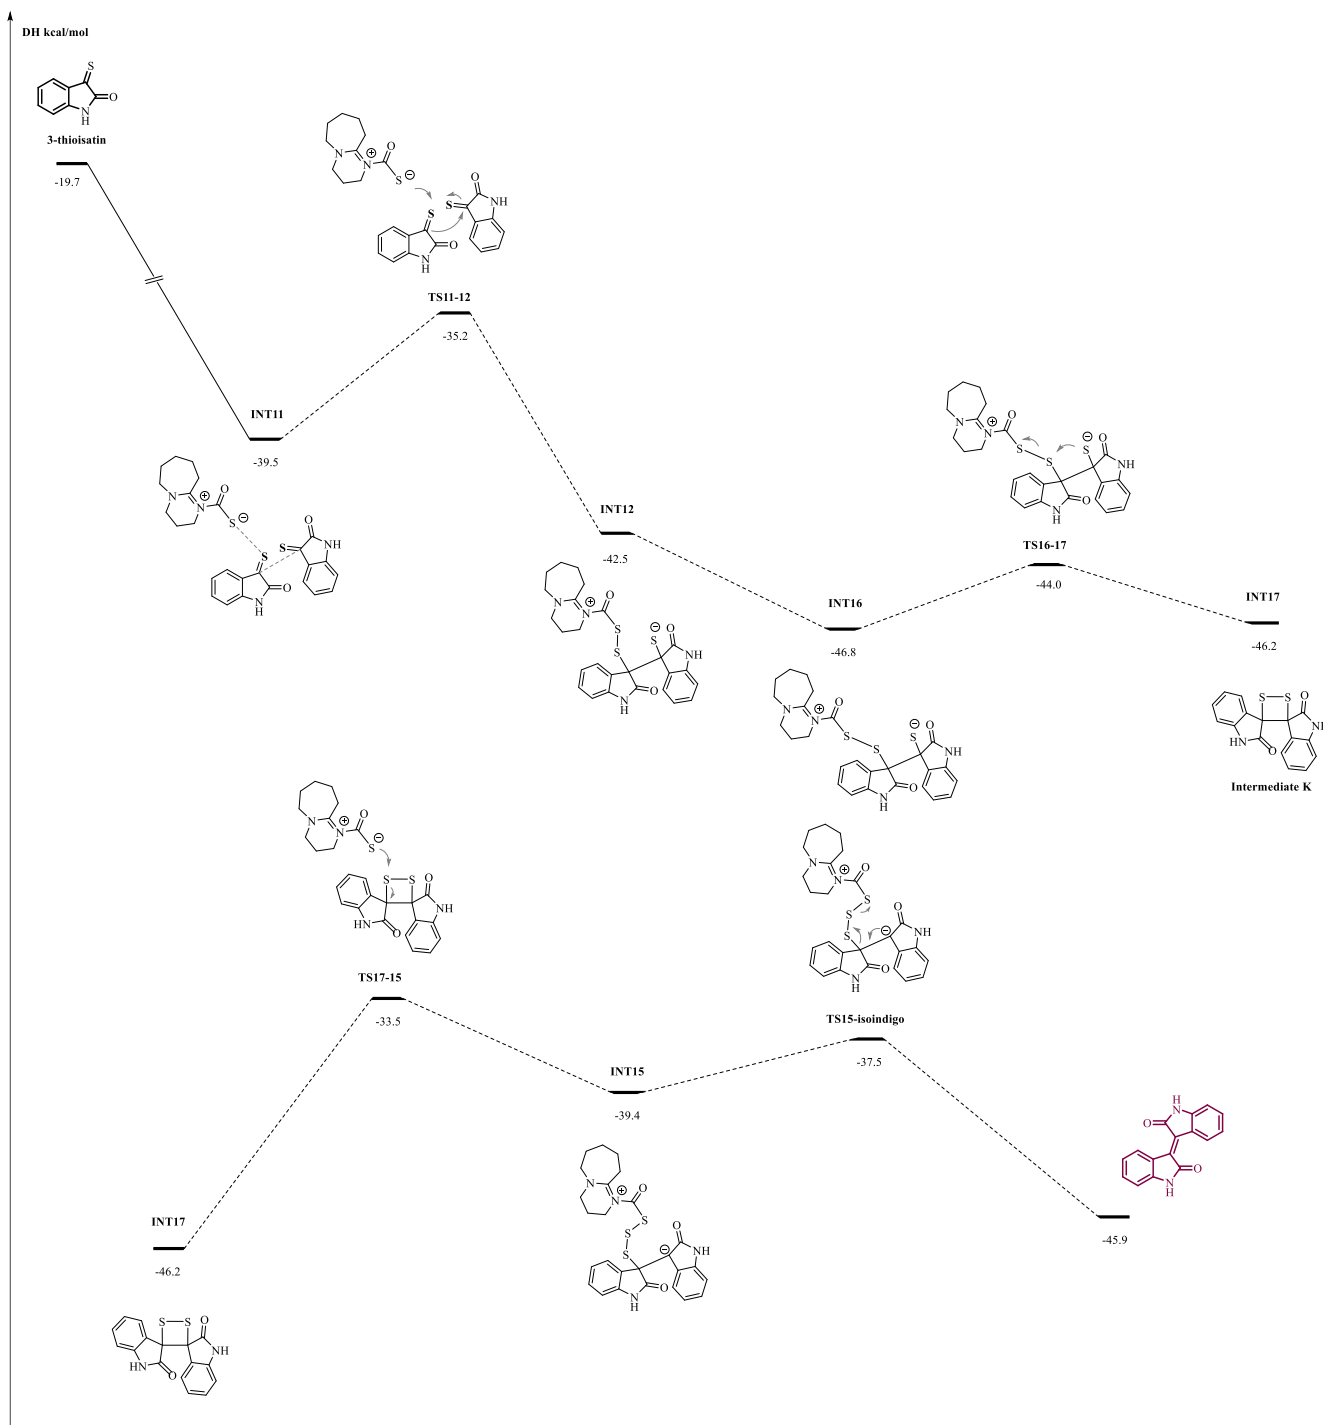

**Figure S18.** DBU-COS adduct-involved self-condensation of thioisatin (**Pathway 2-3**)

On the other hand, **INT 16** could form 1,2-dithietane **INT 17** via **TS 16-17** with an energy barrier of only 2.8 kcal/mol, as shown in **Figure S18**. Subsequently, thiophilic ring opening process of **INT 17** will take place via **TS17-15** (-33.5 kcal/mol) to form **INT 15**. Because the energy barrier for the rate determining step (**TS17-15**) is only 13.3 kcal/mol in **Pathway 2-3**, the self-condensation of 3-thioisatin prefers to proceed via **Pathway 2-3** than **Pathway 2-2**.

## 9. Characterization data of products

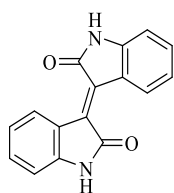

**3a**

**(E)-[3,3'-biindolinylidene]-2-one.** Red solid, 60.8 mg, yield: 98%.  $^1\text{H NMR}$  (400 MHz,  $\text{DMSO-}d_6$ )  $\delta$  10.90 (s, 2H), 9.05 (d,  $J = 7.1$  Hz, 2H), 7.38 – 7.30 (m, 2H), 6.96 (t,  $J = 7.5$  Hz, 2H), 6.84 (d,  $J = 6.6$  Hz, 2H);  $^{13}\text{C NMR}$  (126 MHz,  $\text{DMSO-}d_6$ )  $\delta$  169.0, 144.2, 133.4, 132.7, 129.4, 121.8, 121.2, 109.6; **IR** (KBr  $\text{cm}^{-1}$ ): 3075, 1703, 1650, 1618, 1575, 1463, 870, 778; **HRMS**(ESI): calcd. for  $\text{C}_{16}\text{H}_{11}\text{N}_2\text{O}_2$ :  $[\text{M}+\text{H}]^+$   $m/z$  263.0821, found: 263.0824.

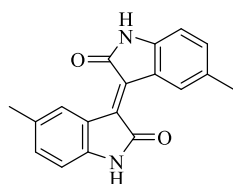

**3b**

**(E)-5,5'-dimethyl-[3,3'-biindolinylidene]-2,2'-dione.** Dark red solid, 63.8 mg, yield: 88%.  $^1\text{H NMR}$  (400 MHz,  $\text{DMSO-}d_6$ )  $\delta$  10.73 (s, 2H), 8.89 (s, 2H), 7.15 (d,  $J = 7.9$  Hz, 2H), 6.73 (d,  $J = 7.9$  Hz, 2H), 2.26 (s, 6H);  $^{13}\text{C NMR}$  (101 MHz,  $\text{DMSO-}d_6$ )  $\delta$  169.6, 142.4, 133.9, 133.2, 130.1, 122.6, 109.6, 21.3; **IR** (KBr  $\text{cm}^{-1}$ ): 3182, 1704, 1621, 1484, 1327, 1258, 1221, 1139, 809, 771; **HRMS**(EI): calcd. for  $\text{C}_{18}\text{H}_{14}\text{N}_2\text{O}_2$ :  $[\text{M}]$   $m/z$  290.1055, found: 290.1059.

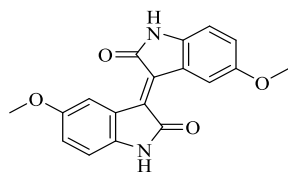

**3c**

**(E)-5,5'-dimethoxy-[3,3'-biindolinylidene]-2,2'-dione.** Blue-green solid, 63.8 mg, yield: 73%.  $^1\text{H NMR}$  (400 MHz,  $\text{DMSO-}d_6$ )  $\delta$  10.69 (s, 2H), 8.85 (d,  $J = 2.2$  Hz, 2H), 6.97 (dd,  $J = 8.4, 2.4$  Hz, 2H), 6.75 (d,  $J = 8.5$  Hz, 2H), 3.73 (s, 6H);  $^{13}\text{C NMR}$  (101 MHz,  $\text{DMSO-}d_6$ )  $\delta$  168.7, 153.9, 137.8, 133.6, 122.1, 118.4, 115.4, 109.2, 55.4; **IR** (KBr  $\text{cm}^{-1}$ ): 3157, 1684, 1651, 1623, 1593, 1478, 1447, 1317, 1223, 1150, 818, 774. **HRMS**(EI): calcd. for  $\text{C}_{18}\text{H}_{14}\text{N}_2\text{O}_4$ :  $[\text{M}]$   $m/z$  322.0954, found: 322.0952.

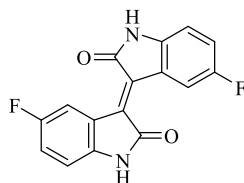

**3d**

**(E)-5,5'-difluoro-[3,3'-biindolinylidene]-2,2'-dione.** Dark red solid. 73 mg, yield: 98%.  $^1\text{H NMR}$  (400 MHz,  $\text{DMSO-}d_6$ )  $\delta$  10.99 (s, 2H), 8.99 (dd,  $J = 11.3, 2.4$  Hz, 2H), 7.24 (td,  $J = 8.6, 2.4$  Hz, 2H), 6.84 (dd,  $J = 8.5, 4.9$  Hz, 2H);  $^{13}\text{C NMR}$  (126 MHz,  $\text{DMSO-}d_6$ )  $\delta$  169.1, 157.1 (d,  $J = 233.2$  Hz), 140.9, 134.0 (d,  $J = 2.5$  Hz), 122.2 (d,  $J = 10.2$  Hz), 119.6 (d,  $J = 24.2$  Hz), 116.3 (d,  $J = 28.2$  Hz), 110.3 (d,  $J = 8.3$  Hz). All the resonances in  $^1\text{H}$  and  $^{13}\text{C}$  NMR spectra were in good agreement with literature values [12].

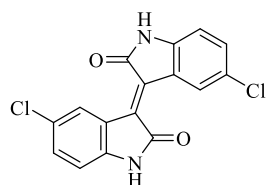

**3e**

**(E)-5,5'-dichloro-[3,3'-biindolinylidene]-2,2'-dione.** Dark red solid, 80 mg, yield: 98%.  $^1\text{H NMR}$  (400 MHz,  $\text{DMSO-}d_6$ )  $\delta$  11.12 (s, 2H), 9.19 (d,  $J = 1.7$  Hz, 2H), 7.43 (dd,  $J = 8.3, 2.0$  Hz, 2H), 6.88 (d,  $J = 8.3$  Hz, 2H);  $^{13}\text{C NMR}$  (126 MHz,  $\text{DMSO-}d_6$ )  $\delta$  168.7, 143.1, 133.4, 132.4, 128.9, 125.1, 122.7, 111.0. All the resonances in  $^1\text{H}$  and  $^{13}\text{C}$  NMR spectra were in good agreement with literature values [13].

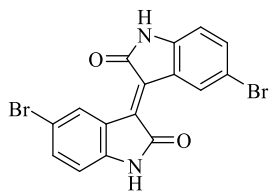

**3f**

**(E)-5,5'-dibromo-[3,3'-biindolinylidene]-2,2'-dione.** Purple-red solid, 102.4 mg, yield: 98%.  $^1\text{H NMR}$  (400 MHz,  $\text{DMSO-}d_6$ )  $\delta$  11.06 (s, 2H), 9.31 (s, 2H), 7.54 (d,  $J = 6.5$  Hz, 2H), 6.83 (d,  $J = 5.7$  Hz, 2H); **IR** ( $\text{KBr cm}^{-1}$ ): 3112, 1701, 1614, 1448, 1319, 1181, 862, 813, 730; **HRMS**(EI): calcd. for  $\text{C}_{16}\text{H}_8\text{Br}_2\text{N}_2\text{O}_2$ :  $[\text{M}]^+ m/z$  417.8953, found: 417.8938.

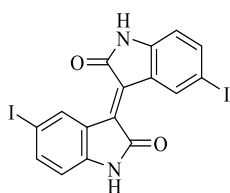

**3g**

**(E)-5,5'-diiodo-[3,3'-biindolinylidene]-2,2'-dione.** Dark red solid, 125.9 mg, yield: 98%.  $^1\text{H NMR}$  (400 MHz,  $\text{DMSO-}d_6$ )  $\delta$  11.02 (s, 2H), 9.46 (s, 2H), 7.69 (d,  $J = 7.5$  Hz, 2H), 6.72 (d,  $J = 8.1$  Hz, 2H);  $^{13}\text{C NMR}$  (151 MHz,  $\text{DMSO-}d_6$ )  $\delta$  183.3, 165.6, 158.9, 150.1, 146.1, 132.6, 120.1, 114.9; **IR** ( $\text{KBr cm}^{-1}$ ): 3184, 1692, 1673, 1610, 1444, 1317, 1183, 1120, 881, 814, 771; **HRMS**(EI) calcd. for  $\text{C}_{16}\text{H}_8\text{I}_2\text{N}_2\text{O}_2$   $[\text{M}]^+ m/z$  513.8675. found: 513.8669.

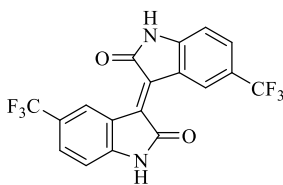

**3h**

**(E)-5,5'-bis(trifluoromethyl)-[3,3'-biindolinylidene]-2,2'-dione.** Red solid, 97.5 mg, yield: 98%.  $^1\text{H NMR}$  (400 MHz,  $\text{DMSO-}d_6$ )  $\delta$  11.32 (s, 2H), 9.54 (s, 2H), 7.71 (d,  $J = 8.1$  Hz, 2H), 7.03 (d,  $J = 8.2$  Hz, 2H);  $^{13}\text{C NMR}$  (101 MHz,  $\text{DMSO-}d_6$ )  $\delta$  168.8, 147.2, 133.2, 129.6 (dd,  $J = 7.5, 3.8$  Hz), 126.4 (q,  $J = 4.1$  Hz), 124.5 (q,  $J = 272.7$  Hz), 122.3 (s), 121.83 (d,  $J = 31.8$  Hz), 110.0; **IR** ( $\text{KBr cm}^{-1}$ ): 3125, 1699, 1624, 1412, 1330, 1162, 1126, 855, 834; **HRMS**(ESI): calcd. for  $\text{C}_{18}\text{H}_7\text{F}_6\text{O}_2\text{N}_2$ : 397.0412  $[\text{M-H}]^-$ , found: 397.0422.

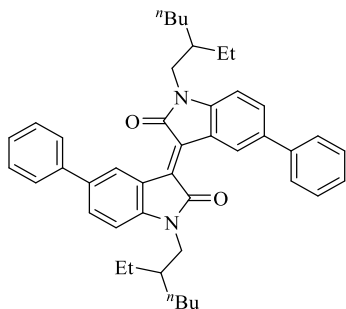

**3i**

**(E)-1,1'-bis(2-ethylhexyl)-5,5'-diphenyl-[3,3'-biindolinylidene]-2,2'-dione.** Red oil liquid. 156.4 mg, yield: 98%.  $^1\text{H NMR}$  (400 MHz,  $\text{CDCl}_3$ )  $\delta$  9.49 (s, 2H), 7.67 (d,  $J = 7.9$  Hz, 4H), 7.59 (d,  $J = 8.1$  Hz, 2H), 7.47 (t,  $J = 7.6$  Hz, 4H), 7.35 (t,  $J = 7.0$  Hz, 2H), 6.83 (d,  $J = 8.1$  Hz, 2H), 3.76 – 3.63 (m, 4H), 1.93 – 1.84 (m, 2H), 1.43 – 1.28 (m, 16H), 0.99 – 0.89 (m, 12H);

$^{13}\text{C}$  NMR (101 MHz,  $\text{CDCl}_3$ )  $\delta$  168.4, 144.6, 141.2, 135.4, 134.0, 131.2, 128.9, 128.7, 127.0, 122.3, 108.5, 44.3, 37.7, 30.8, 28.8, 24.2, 23.2, 14.2, 10.9; **IR** (neat  $\text{cm}^{-1}$ ): 2959, 1689, 1608, 1598, 1478, 1456, 1347, 1220, 1175, 1113, 810, 757; **HRMS**(ESI): calcd. for  $\text{C}_{44}\text{H}_{51}\text{N}_2\text{O}_2$   $[\text{M}+\text{H}]^+$   $m/z$  639.3951, found: 639.3938.

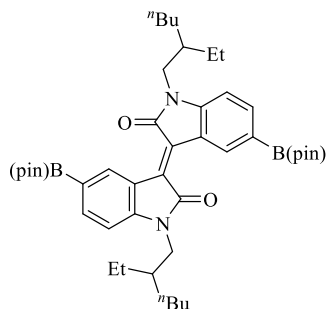

**3j**

**(E)-1,1'-bis(2-ethylhexyl)-5,5'-bis(4,4,5,5-tetramethyl-1,3,2-dioxaborolan-2-yl)-[3,3'-biindolinylidene]-2,2'-dione.**

Red oil liquid, 180.9 mg, yield: 98%.  $^1\text{H}$  NMR (400 MHz,  $\text{CDCl}_3$ )  $\delta$  9.39 (s, 2H), 7.80 (d,  $J = 7.3$  Hz, 2H), 6.77 (d,  $J = 7.7$  Hz, 2H), 3.69 (m, 4H), 1.86 (m, 2H), 1.38 – 1.28 (m, 40H), 0.94 – 0.87 (m, 12H);  $^{13}\text{C}$  NMR (151 MHz,  $\text{CDCl}_3$ )  $\delta$  168.5, 147.8, 139.5, 135.8, 133.5, 130.0, 121.5, 107.9, 83.9, 44.3, 37.7, 30.8, 28.9, 25.0, 24.3, 23.3, 14.2, 10.9; **IR** (neat  $\text{cm}^{-1}$ ): 2951, 1739, 1612, 1470, 1352, 1191, 1126, 1073, 974, 756; **HRMS**(ESI): calcd. for  $\text{C}_{44}\text{H}_{64}\text{B}_2\text{N}_2\text{O}_6$   $[\text{M}+\text{H}]^+$   $m/z$  739.5029, found: 739.5029.

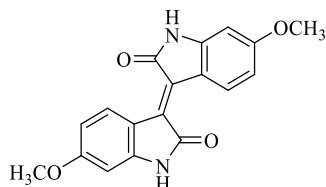

**3k**

**(E)-6,6'-dimethoxy-[3,3'-biindolinylidene]-2,2'-dione.** Red solid, 40.3 mg, yield: 50%.  $^1\text{H}$  NMR (400 MHz,  $\text{DMSO}-d_6$ )  $\delta$  10.79 (s, 2H), 9.00 (s, 2H), 6.45 (d,  $J = 58.2$  Hz, 4H), 3.81 (s, 6H);  $^{13}\text{C}$  NMR (101 MHz,  $\text{DMSO}-d_6$ )  $\delta$  170.0, 162.4, 145.7, 130.8, 129.7, 115.1, 106.64, 95.4, 55.4; **IR** (KBr  $\text{cm}^{-1}$ ): 3161, 1685, 1630, 1508, 1453, 1334, 1199, 1125, 836, 617; **HRMS**(ESI): calcd. for  $\text{C}_{18}\text{H}_{15}\text{N}_2\text{O}_4$   $[\text{M}+\text{H}]^+$   $m/z$  323.1032, found: 323.1026.

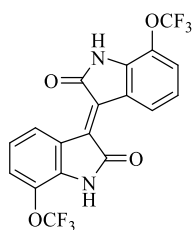

**3l**

**(E)-7,7'-bis(trifluoromethoxy)-[3,3'-biindolinylidene]-2,2'-dione.** Red solid, 84.9 mg, yield: 79%.  $^1\text{H}$  NMR (400 MHz,  $\text{DMSO}-d_6$ )  $\delta$  11.70 (s, 2H), 7.64 (d,  $J = 8.3$  Hz, 2H), 7.55 (d,  $J = 7.4$  Hz, 2H), 7.15 (t,  $J = 7.9$  Hz, 2H);  $^{13}\text{C}$  NMR (151 MHz,  $\text{CDCl}_3$ )  $\delta$  168.6, 137.3, 133.6, 131.1, 128.5, 125.6, 123.9, 121.6, 120.3 (d,  $J = 257.4$  Hz); **IR** (KBr  $\text{cm}^{-1}$ ): 3197, 1697, 1636, 1579, 1491, 1452, 1325, 1160, 865, 740; **HRMS**(EI) calcd. for  $\text{C}_{18}\text{H}_8\text{F}_6\text{N}_2\text{O}_4$   $[\text{M}]^+$   $m/z$  430.0388, found: 430.0381.

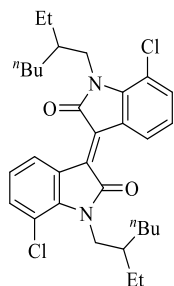

**3m**



**(E)-7,7'-dichloro-1,1'-bis(2-ethylhexyl)-[3,3'-biindolinylidene]-2,2'-dione.** Dark red solid, 135.7 mg, yield: 98%. <sup>1</sup>H NMR (400 MHz, CDCl<sub>3</sub>) δ 8.97 (d, *J* = 7.9 Hz, 2H), 7.27 (d, *J* = 8.2 Hz, 2H), 6.94 (t, *J* = 8.0 Hz, 2H), 4.07 (d, *J* = 7.5 Hz, 4H), 2.10 – 1.80 (m, 2H), 1.42 – 1.16 (m, 16H), 1.00 – 0.74 (m, 12H); <sup>13</sup>C NMR (101 MHz, CDCl<sub>3</sub>) δ 168.3, 140.8, 135.3, 133.5, 128.1, 124.7, 123.0, 115.1, 46.0, 39.2, 30.2, 28.5, 23.4, 23.2, 14.2, 10.7; IR (neat cm<sup>-1</sup>): 2958, 1697, 1591, 1466, 1451, 1217, 786, 729; HRMS(ESI): calcd. for C<sub>32</sub>H<sub>41</sub>Cl<sub>2</sub>N<sub>2</sub>O<sub>2</sub> [M+H]<sup>+</sup> m/z 555.2545, found: 555.2539.

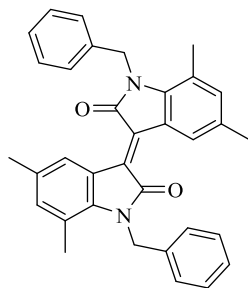

**3n**

**(E)-1,1'-dibenzyl-5,5',7,7'-tetramethyl-[3,3'-biindolinylidene]-2,2'-dione.** Purple-red solid, 122.1 mg, yield: 98%. <sup>1</sup>H NMR (400 MHz, CDCl<sub>3</sub>) δ 8.85 (s, 2H), 7.34 (t, *J* = 7.3 Hz, 4H), 7.24 (t, *J* = 8.6 Hz, 6H), 6.87 (s, 2H), 5.32 (d, *J* = 5.1 Hz, 4H), 2.30 (s, 6H), 2.26 (s, 6H); <sup>13</sup>C NMR (101 MHz, CDCl<sub>3</sub>) δ 169.1, 140.4, 137.7, 137.6, 133.7, 131.6, 129.0, 128.0, 127.3, 125.8, 123.0, 119.0, 45.4, 21.1, 19.0. IR (neat cm<sup>-1</sup>): 2920, 1736, 1687, 1593, 1446, 1340, 1350, 869, 742; HRMS(ESI): calcd. for C<sub>34</sub>H<sub>31</sub>N<sub>2</sub>O<sub>2</sub> [M+H]<sup>+</sup> m/z 499.2386, found: 499.2378.

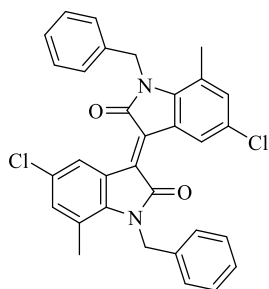

**3o**

**(E)-1,1'-dibenzyl-5,5'-dichloro-7,7'-dimethyl-[3,3'-biindolinylidene]-2,2'-dione.** Dark red solid, 131.8 mg, yield: 98%. <sup>1</sup>H NMR (400 MHz, CDCl<sub>3</sub>) δ 9.12 (s, 2H), 7.33 (t, *J* = 7.5 Hz, 4H), 7.27 (d, *J* = 6.6 Hz, 2H), 7.17 (d, *J* = 7.5 Hz, 4H), 7.05 (s, 2H), 5.30 (s, 4H), 2.26 (s, 6H); <sup>13</sup>C NMR (101 MHz, CDCl<sub>3</sub>) δ 168.6, 141.4, 137.1, 136.4, 133.5, 129.2, 127.6, 127.6, 127.6, 125.7, 123.7, 120.8, 45.5, 19.00; IR (neat cm<sup>-1</sup>): 2920, 1692, 1631, 1535, 1446, 1382, 1219, 1073, 912, 772; HRMS(ESI): calcd. for C<sub>32</sub>H<sub>25</sub>Cl<sub>2</sub>N<sub>2</sub>O<sub>2</sub> [M+H]<sup>+</sup> m/z 539.1293, found: 539.1265.

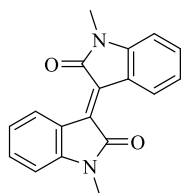

**3p**

**(E)-1,1'-dimethyl-[3,3'-biindolinylidene]-2,2'-dione.** Red solid, 65.9 mg, yield: 91%. <sup>1</sup>H NMR (400 MHz, CDCl<sub>3</sub>) δ 9.22 (d, *J* = 7.4 Hz, 1H), 7.38 (td, *J* = 7.7, 1.1 Hz, 1H), 7.07 (td, *J* = 7.9, 1.0 Hz, 1H), 6.79 (d, *J* = 7.7 Hz, 1H), 3.29 (s, 3H); <sup>13</sup>C NMR (101 MHz, CDCl<sub>3</sub>) δ 168.1, 145.3, 133.5, 132.5, 130.0, 122.5, 121.7, 107.8, 26.2. All the resonances in <sup>1</sup>H and <sup>13</sup>C NMR spectra were in good agreement with literature values [14].

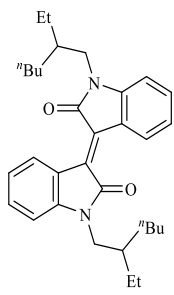

**3q**

**(E)-1,1'-bis(2-ethylhexyl)-[3,3'-biindolinylidene]-2,2'-dione.** Red oil liquid, 114.3 mg, yield: 94%.  $^1\text{H NMR}$  (400 MHz,  $\text{CDCl}_3$ )  $\delta$  9.16 (d,  $J = 8.0$  Hz, 2H), 7.34 (t,  $J = 7.7$  Hz, 2H), 7.04 (t,  $J = 7.8$  Hz, 2H), 6.77 (d,  $J = 7.8$  Hz, 2H), 3.74 – 3.60 (m, 4H), 1.91 – 1.81 (m, 2H), 1.41 – 1.26 (m, 16H), 0.91 (dt,  $J = 13.7, 7.2$  Hz, 12H);  $^{13}\text{C NMR}$  (101 MHz,  $\text{CDCl}_3$ )  $\delta$  168.4, 145.3, 133.7, 132.4, 129.9, 122.3, 121.9, 108.3, 44.4, 37.7, 30.9, 28.9, 24.2, 23.2, 14.2, 10.9; **IR** (neat  $\text{cm}^{-1}$ ): 2953, 2921, 2851, 1691, 1607, 1463, 1349, 1194, 1100, 747, 593; **HRMS**(ESI) calcd. for  $\text{C}_{32}\text{H}_{43}\text{N}_2\text{O}_2$   $[\text{M}+\text{H}]^+$   $m/z$  487.3325, found: 487.3315.

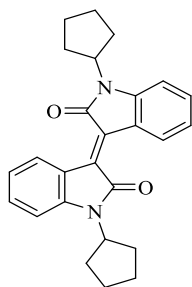

**3r**

**(E)-1,1'-dicyclopentyl-[3,3'-biindolinylidene]-2,2'-dione.** Red solid, 97.5 mg, yield: 98%.  $^1\text{H NMR}$  (400 MHz,  $\text{CDCl}_3$ )  $\delta$  9.13 (d,  $J = 7.9$  Hz, 2H), 7.32 (t,  $J = 7.7$  Hz, 2H), 7.03 (t,  $J = 7.8$  Hz, 2H), 6.87 (d,  $J = 7.9$  Hz, 2H), 4.90 – 4.81 (m, 2H), 2.23 – 2.08 (m, 4H), 2.02 – 1.89 (m, 8H), 1.79 – 1.68 (m, 8H);  $^{13}\text{C NMR}$  (101 MHz,  $\text{CDCl}_3$ )  $\delta$  167.9, 144.0, 133.8, 132.1, 130.0, 122.1, 121.9, 109.2, 52.4, 27.6, 25.3; **IR** (neat  $\text{cm}^{-1}$ ): 3129, 2972, 2912, 1691, 1600, 1462, 1363, 1104, 741, 600, 458; **HRMS**(ESI) calcd. for  $\text{C}_{26}\text{H}_{27}\text{N}_2\text{O}_2$   $[\text{M}+\text{H}]^+$   $m/z$  399.2073, found: 399.2069.

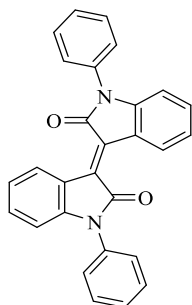

**3s**

**(E)-1,1'-dibenzyl-[3,3'-biindolinylidene]-2,2'-dione.** Red solid, 108.3 mg, yield: 98%.  $^1\text{H NMR}$  (400 MHz,  $\text{CDCl}_3$ )  $\delta$  9.22 (d,  $J = 7.4$  Hz, 2H), 7.36 – 7.26 (m, 12H), 7.09 – 7.01 (m, 2H), 6.72 (d,  $J = 7.8$  Hz, 2H), 5.02 (s, 4H);  $^{13}\text{C NMR}$  (101 MHz,  $\text{CDCl}_3$ )  $\delta$  168.2, 144.6, 135.9, 132.6, 130.1, 129.0, 127.8, 127.4, 122.6, 121.9, 108.8, 43.8. All the resonances in  $^1\text{H}$  and  $^{13}\text{C NMR}$  spectra were in good agreement with literature values [12].

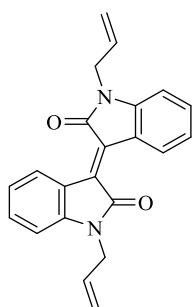

**3t**

**(E)-1,1'-dibenzyl-[3,3'-biindolinylidene]-2,2'-dione.** Red solid, 83.8 mg, yield: 98%.  $^1\text{H NMR}$  (400 MHz,  $\text{CDCl}_3$ )  $\delta$  9.20 (d,  $J = 8.0$  Hz, 2H), 7.34 (t,  $J = 7.6$  Hz, 2H), 7.06 (t,  $J = 7.6$  Hz, 2H), 6.79 (d,  $J = 7.8$  Hz, 2H), 5.88 (ddd,  $J = 22.3, 10.3, 5.1$  Hz, 2H), 5.25 (t,  $J = 13.0$  Hz, 4H), 4.44 (d,  $J = 5.1$  Hz, 4H);  $^{13}\text{C NMR}$  (101 MHz,  $\text{CDCl}_3$ )  $\delta$  167.8, 144.6, 133.5, 132.5, 131.3, 130.1, 122.5, 121.7, 117.7, 108.6, 42.4. All the resonances in  $^1\text{H}$  and  $^{13}\text{C}$  NMR spectra were in good agreement with literature values [12].

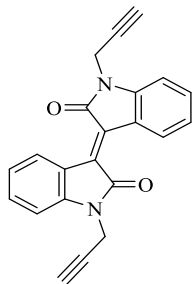

**3u**

**(E)-1,1'-di(prop-2-yn-1-yl)-[3,3'-biindolinylidene]-2,2'-dione.** Red solid, 82.8 mg, yield: 98%.  $^1\text{H NMR}$  (400 MHz,  $\text{DMSO-}d_6$ )  $\delta$  9.10 (d,  $J = 8.0$  Hz, 2H), 7.51 (t,  $J = 7.7$  Hz, 2H), 7.17 – 7.09 (m, 4H), 4.66 (d,  $J = 2.1$  Hz, 4H), 3.30 (s, 2H);  $^{13}\text{C NMR}$  (151 MHz,  $\text{DMSO-}d_6$ )  $\delta$  166.4, 143.3, 133.1, 132.6, 129.3, 122.4, 120.9, 109.3, 77.9, 74.5, 29.0; **IR** (neat  $\text{cm}^{-1}$ ): 3283, 2970, 1692, 1609, 1471, 1357, 1188, 1107, 1078, 774, 653, 464; **HRMS**(ESI) calcd. for  $\text{C}_{22}\text{H}_{15}\text{N}_2\text{O}_2$   $[\text{M}+\text{H}]^+$   $m/z$  339.1143, found: 339.1133.

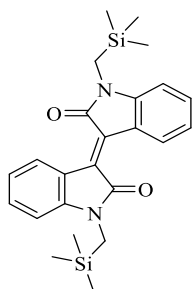

**3v**

**(E)-1,1'-bis(trimethylsilyl)methyl-[3,3'-biindolinylidene]-2,2'-dione.** Red solid, 106.4 mg, yield: 98%.  $^1\text{H NMR}$  (400 MHz,  $\text{CDCl}_3$ )  $\delta$  9.17 (d,  $J = 8.0$  Hz, 2H), 7.32 (t,  $J = 7.7$  Hz, 2H), 7.02 (t,  $J = 7.8$  Hz, 2H), 6.70 (d,  $J = 7.8$  Hz, 2H), 3.30 (s, 4H), 0.14 (s, 18H);  $^{13}\text{C NMR}$  (101 MHz,  $\text{CDCl}_3$ )  $\delta$  167.6, 145.6, 133.5, 132.2, 129.6, 122.3, 122.1, 108.2, 31.5, -1.2; **IR** (neat  $\text{cm}^{-1}$ ): 3130, 2953, 2851, 1687, 1605, 1467, 1353, 1176, 1101, 857, 844, 744; **HRMS**(ESI) calcd. for  $\text{C}_{24}\text{H}_{31}\text{N}_2\text{O}_2\text{Si}_2$   $[\text{M}+\text{H}]^+$   $m/z$  435.1924, found: 435.1916.

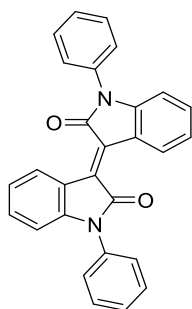

**3w**

**(E)-1,1'-diphenyl-[3,3'-biindolinylidene]-2,2'-dione.** Red solid, 101.4 mg, yield: 98%.  $^1\text{H NMR}$  (400 MHz,  $\text{CDCl}_3$ )  $\delta$  9.23 (d,  $J = 8.0$  Hz, 2H), 7.58 (dd,  $J = 9.9, 5.6$  Hz, 4H), 7.50 – 7.43 (m, 6H), 7.31 – 7.26 (m, 2H), 7.09 – 7.02 (m, 2H), 6.75 (d,  $J = 7.8$  Hz, 2H);  $^{13}\text{C NMR}$  (126 MHz,  $\text{CDCl}_3$ )  $\delta$  167.6, 145.5, 132.7, 130.4, 129.9, 128.5, 127.3, 123.0, 121.7, 109.2. All the resonances in  $^1\text{H}$  and  $^{13}\text{C}$  NMR spectra were in good agreement with literature values [12].

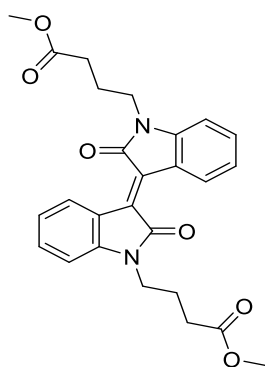

**3x**

**Dimethyl 4,4'-(2,2'-dioxo-[3,3'-biindolinylidene]-1,1'-diyl)(E)-dibutyrate.** Red solid,  $^1\text{H NMR}$  (400 MHz,  $\text{CDCl}_3$ )  $\delta$  9.16 (d,  $J = 7.9$  Hz, 2H), 7.37 (t,  $J = 7.7$  Hz, 2H), 7.05 (t,  $J = 7.8$  Hz, 2H), 6.88 (d,  $J = 7.8$  Hz, 2H), 3.85 (t,  $J = 7.2$  Hz, 4H), 3.67 (s, 6H), 2.44 (t,  $J = 7.1$  Hz, 4H), 2.05 (p,  $J = 7.2$  Hz, 4H);  $^{13}\text{C NMR}$  (101 MHz,  $\text{CDCl}_3$ )  $\delta$  173.4, 168.1, 144.6, 133.6, 132.7, 130.1, 122.5, 121.8, 108.1, 51.9, 39.2, 31.1, 22.7; **IR** (neat  $\text{cm}^{-1}$ ): 2919, 2852, 1733, 1687, 1603, 1464, 1355, 1161, 1077, 773, 750; **HRMS**(ESI) calcd. for  $\text{C}_{26}\text{H}_{27}\text{N}_2\text{O}_6$   $[\text{M}+\text{H}]^+$   $m/z$  463.1869, found: 463.1857.

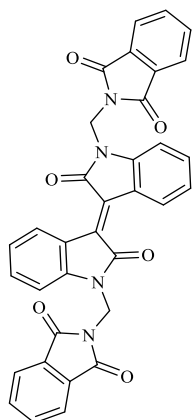

**3y**

**(E)-2,2'-((2,2'-dioxo-[3,3'-biindolinylidene]-1,1'-diyl)bis(methylene))bis(isoindoline-1,3-dione).** Red solid, 142.1 mg, yield: 98%.  $^1\text{H NMR}$  (400 MHz,  $\text{DMSO}-d_6$ )  $\delta$  9.10 (d,  $J = 8.0$  Hz, 2H), 7.88 – 7.84 (m, 8H), 7.45 (t,  $J = 7.7$  Hz, 2H), 7.26 (d,  $J = 7.9$  Hz, 2H), 7.10 (t,  $J = 7.8$  Hz, 2H), 5.69 (s, 4H); **IR** ( $\text{KBr cm}^{-1}$ ): 3429, 1776, 1726, 1611, 1470, 1405, 1326, 1301, 1101, 1022, 925, 779, 749, 724, 709; **HRMS**(ESI) calcd. for  $\text{C}_{34}\text{H}_{21}\text{N}_4\text{O}_6$   $[\text{M}+\text{H}]^+$   $m/z$  581.1461, found: 581.1454.

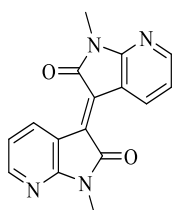

**3z**

**(E)-1,1'-dimethyl-[3,3'-bipyrrolo[2,3-b]pyridinylidene]-2,2'(1H,1'H)-dione.** Red solid, 66.4 mg, yield: 91%.  $^1\text{H NMR}$  (400 MHz,  $\text{CDCl}_3$ )  $\delta$  9.46 (d,  $J = 7.7$  Hz, 2H), 8.24 (d,  $J = 4.5$  Hz, 2H), 7.02 (dd,  $J = 7.6, 5.3$  Hz, 2H), 3.38 (s, 6H);  $^{13}\text{C NMR}$  (126 MHz,  $\text{CDCl}_3$ )  $\delta$  167.8, 157.8, 150.4, 137.6, 132.3, 118.8, 116.2, 25.5; **IR** (neat  $\text{cm}^{-1}$ ): 2921, 1705, 1598, 1463, 1339, 1260, 1194, 1020, 803, 759; **HRMS**(ESI) calcd. for  $\text{C}_{16}\text{H}_{13}\text{N}_4\text{O}_2$   $[\text{M}+\text{H}]^+$   $m/z$  293.1039, found: 293.1034  $[\text{M}+\text{H}]^+$ .

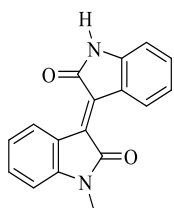

**9**

**(E)-1-methyl-[3,3'-biindolinylidene]-2,2'-dione.** Red solid, 20 mg, yield: 29%.  $^1\text{H NMR}$  (400 MHz,  $\text{DMSO-}d_6$ )  $\delta$  10.89 (s, 1H), 9.07 (d,  $J = 7.7$  Hz, 2H), 7.41 (t,  $J = 7.4$  Hz, 1H), 7.34 (t,  $J = 7.4$  Hz, 1H), 7.06 – 6.92 (m, 3H), 6.83 (d,  $J = 7.6$  Hz, 1H), 3.21 (s, 3H);  $^{13}\text{C NMR}$  (101 MHz,  $\text{DMSO-}d_6$ )  $\delta$  168.9, 167.2, 145.0, 144.2, 133.8, 132.9, 132.6, 132.3, 129.5, 129.0, 121.8, 121.7, 121.2, 120.8, 109.6, 108.5, 26.1. All the resonances in  $^1\text{H}$  and  $^{13}\text{C}$  NMR spectra were in good agreement with literature values [13].

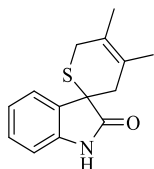

**4aa**

**4',5'-dimethyl-3',6'-dihydrospiro[indoline-3,2'-thiopyran]-2-one.** Pale yellow solid, 111.5 mg, yield: 91%.  $^1\text{H NMR}$  (400 MHz,  $\text{CDCl}_3$ )  $\delta$  7.88 (s, 1H), 7.27 – 7.20 (m, 2H), 7.05 (dd,  $J = 15.5, 7.9$  Hz, 1H), 6.91 (d,  $J = 7.8$  Hz, 1H), 3.80 (d,  $J = 16.7$  Hz, 1H), 3.07 (d,  $J = 16.8$  Hz, 1H), 2.64 – 2.47 (m, 2H), 1.91 (s, 3H), 1.78 (s, 3H);  $^{13}\text{C NMR}$  (151 MHz,  $\text{CDCl}_3$ )  $\delta$  178.6, 139.8, 132.2, 128.9, 124.8, 123.9, 123.8, 122.9, 110.0, 47.1, 37.8, 30.2, 20.5, 19.7; **IR** (neat  $\text{cm}^{-1}$ ): 2920, 1710, 1601, 1471, 1372, 1279, 1180, 1225, 1141, 1108, 1017, 724; **HRMS**(APCI): calcd. for  $\text{C}_{14}\text{H}_{16}\text{NOS}$ :  $[\text{M}+\text{H}]^+$   $m/z$  246.0953, found: 246.0947.

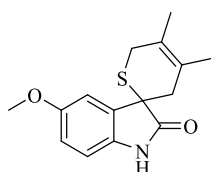

**4ca**

**5-methoxy-4',5'-dimethyl-3',6'-dihydrospiro[indoline-3,2'-thiopyran]-2-one.** Pale yellow solid, 119.7 mg, yield: 87%.  $^1\text{H NMR}$  (400 MHz,  $\text{CDCl}_3$ )  $\delta$  8.76 (s, 1H), 6.82 (dd,  $J = 12.4, 5.4$  Hz, 2H), 6.76 (dd,  $J = 8.4, 2.6$  Hz, 1H), 3.75 (d,  $J = 17.6$  Hz, 4H), 3.08 (d,  $J = 16.7$  Hz, 1H), 2.61 – 2.45 (m, 2H), 1.88 (s, 3H), 1.76 (s, 3H);  $^{13}\text{C NMR}$  (151 MHz,  $\text{CDCl}_3$ )  $\delta$  179.3, 156.0, 133.7, 133.4, 124.9, 123.9, 113.4, 110.9, 110.6, 55.9, 47.8, 37.9, 30.2, 20.5, 19.7; **IR** (neat  $\text{cm}^{-1}$ ): 1720, 1609, 1595, 1499, 1480, 1370, 1180, 1075, 753; **HRMS**(ESI): calcd. for  $\text{C}_{15}\text{H}_{16}\text{NO}_2\text{S}$ :  $[\text{M}-\text{H}]^-$   $m/z$  274.0902, found: 274.0906.

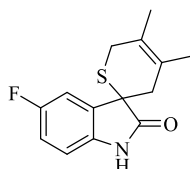

**4da**

**5-fluoro-4',5'-dimethyl-3',6'-dihydrospiro[indoline-3,2'-thiopyran]-2-one.** Pale yellow solid, 117.1 mg, yield: 89%.  $^1\text{H NMR}$  (400 MHz,  $\text{CDCl}_3$ )  $\delta$  9.13 (s, 1H), 7.02 – 6.61 (m, 3H), 3.68 (d,  $J = 16.8$  Hz, 1H), 3.12 (d,  $J = 16.8$  Hz, 1H), 2.52 (dd,  $J = 57.7, 17.3$  Hz, 2H), 1.89 (s, 3H), 1.76 (s, 3H);  $^{13}\text{C NMR}$  (151 MHz,  $\text{CDCl}_3$ )  $\delta$  179.4, 160.0, 158.4, 135.9 (d,  $J = 3.0$  Hz), 134.1 (d,  $J = 9.1$  Hz), 124.8, 124.0, 113.4 (dd,  $J = 90.6$  Hz), 110.9 (d,  $J = 3.0$  Hz), 48.1, 37.7, 30.1, 20.6, 19.7; **IR** (neat  $\text{cm}^{-1}$ ): 1711, 1629, 1487, 1180, 1142, 815; **HRMS**(ESI): calcd. for  $\text{C}_{14}\text{H}_{13}\text{FNOS}$ :  $[\text{M}-\text{H}]^-$   $m/z$  262.0702, found: 262.0713.

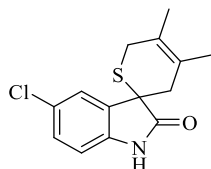

**4ea**

**5-chloro-4',5'-dimethyl-3',6'-dihydrospiro[indoline-3,2'-thiopyran]-2-one.** Pale yellow solid, 128.4 mg, yield: 92%.  $^1\text{H NMR}$  (400 MHz,  $\text{CDCl}_3$ )  $\delta$  8.28 (s, 1H), 7.21 (dd,  $J = 8.3, 1.8$  Hz, 1H), 7.16 (s, 1H), 6.84 (d,  $J = 8.3$  Hz, 1H), 3.72 (d,  $J = 16.8$  Hz, 1H), 3.07 (d,  $J = 16.8$  Hz, 1H), 2.59 – 2.44 (m, 2H), 1.89 (s, 3H), 1.76 (s, 3H);  $^{13}\text{C NMR}$  (151 MHz,  $\text{CDCl}_3$ )  $\delta$  178.9, 137.4, 132.4, 132.2, 129.3, 124.7, 124.6, 123.8, 109.7, 47.1, 37.8, 30.2, 20.5, 19.8; **IR** (neat  $\text{cm}^{-1}$ ): 3223, 1712, 1617, 1478, 1439, 1307, 1180, 1142, 1075, 811; **HRMS**(ESI): calcd. for  $\text{C}_{14}\text{H}_{13}\text{ClNOS}$ :  $[\text{M}-\text{H}]^-$   $m/z$  278.0406, found: 278.0412.

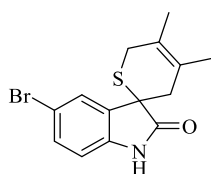

**4fa**

**5-bromo-4',5'-dimethyl-3',6'-dihydrospiro[indoline-3,2'-thiopyran]-2-one.** Pale yellow solid, 148.6 mg, yield: 92%.  $^1\text{H NMR}$  (600 MHz,  $\text{CDCl}_3$ )  $\delta$  8.50 (s, 1H), 7.36 (d,  $J = 8.2$  Hz, 1H), 7.29 (s, 1H), 6.80 (d,  $J = 8.2$  Hz, 1H), 3.73 (d,  $J = 16.8$  Hz, 1H), 3.07 (d,  $J = 16.7$  Hz, 1H), 2.57 – 2.45 (m, 2H), 1.89 (s, 3H), 1.76 (s, 3H);  $^{13}\text{C NMR}$  (151 MHz,  $\text{CDCl}_3$ )  $\delta$  178.5, 138.9, 134.4, 131.8, 127.1, 124.6, 124.0, 115.4, 111.6, 47.5, 37.6, 30.1, 20.5, 19.7; **IR** (neat  $\text{cm}^{-1}$ ): 1711, 1616, 1474, 1306, 1180, 1142, 1076, 810; **HRMS**(ESI): calcd. for  $\text{C}_{14}\text{H}_{13}\text{BrNOS}$ :  $[\text{M}-\text{H}]^-$   $m/z$  323.9881, found: 323.9884.

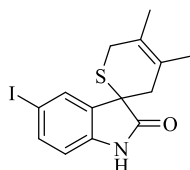

**4ga**

**5-iodo-4',5'-dimethyl-3',6'-dihydrospiro[indoline-3,2'-thiopyran]-2-one.** Pale yellow solid, 165.1 mg, yield: 89%.  $^1\text{H NMR}$  (400 MHz,  $\text{CDCl}_3$ )  $\delta$  7.90 (s, 1H), 7.55 (dd,  $J = 8.2, 1.6$  Hz, 1H), 7.48 (d,  $J = 1.3$  Hz, 1H), 6.68 (d,  $J = 8.2$  Hz, 1H), 3.76 (d,  $J = 16.8$  Hz, 1H), 3.03 (d,  $J = 16.7$  Hz, 1H), 2.57 – 2.43 (m, 2H), 1.88 (s, 3H), 1.76 (s, 3H);  $^{13}\text{C NMR}$  (151 MHz,  $\text{CDCl}_3$ )  $\delta$  177.9, 139.5, 137.7, 134.6, 132.8, 124.5, 123.9, 112.0, 47.0, 37.6, 30.1, 20.5, 19.7; **IR** (neat  $\text{cm}^{-1}$ ): 1713, 1610, 1473, 1229, 1180, 1132, 1076; **HRMS**(ESI): calcd. for  $\text{C}_{14}\text{H}_{13}\text{INOS}$ :  $[\text{M}-\text{H}]^-$   $m/z$  369.9763, found: 369.9763.

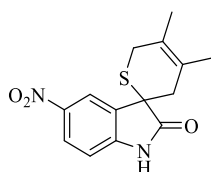

**4a\*a**

**4',5'-dimethyl-5-nitro-3',6'-dihydrospiro[indoline-3,2'-thiopyran]-2-one.** Pale yellow solid, 130.5 mg, yield: 90%.  $^1\text{H NMR}$  (400 MHz,  $\text{CDCl}_3$ )  $\delta$  9.12 (s, 1H), 8.23 (dd,  $J = 8.6, 2.3$  Hz, 1H), 8.09 (d,  $J = 2.2$  Hz, 1H), 7.05 (d,  $J = 8.6$  Hz, 1H), 3.73 (d,  $J = 16.7$  Hz, 1H), 3.13 (d,  $J = 16.8$  Hz, 1H), 2.58 (s, 2H), 1.93 (s, 3H), 1.79 (s, 3H);  $^{13}\text{C NMR}$  (151 MHz,  $\text{CDCl}_3$ )  $\delta$  179.3, 145.7, 143.8, 133.3, 126.0, 124.4, 124.2, 119.9, 110.1, 47.4, 37.4, 30.1, 20.6, 19.7; **IR** (neat  $\text{cm}^{-1}$ ): 1721, 1624, 1604, 1523, 1337, 1180, 734; **HRMS**(ESI): calcd. for  $\text{C}_{14}\text{H}_{13}\text{N}_2\text{O}_3\text{S}$ :  $[\text{M}-\text{H}]^-$   $m/z$  289.0647, found: 289.0654.

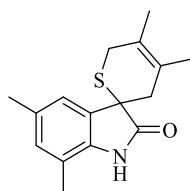

**4b\*a**

**4',5,5',7-tetramethyl-3',6'-dihydrospiro[indoline-3,2'-thiopyran]-2-one.** Yellow solid, 127.0 mg, yield: 93%.  $^1\text{H NMR}$  (400 MHz,  $\text{CDCl}_3$ )  $\delta$  9.20 (s, 1H), 6.86 (d,  $J = 6.7$  Hz, 2H), 3.80 (d,  $J = 16.7$  Hz, 1H), 3.04 (d,  $J = 16.7$  Hz, 1H), 2.53 (q,  $J = 17.6$  Hz, 2H), 2.29 (s, 3H), 2.25 (s, 3H), 1.87 (s, 3H), 1.76 (s, 3H);  $^{13}\text{C NMR}$  (151 MHz,  $\text{CDCl}_3$ )  $\delta$  179.9, 136.4, 132.2, 131.8, 130.8, 124.6, 123.6, 121.7, 119.3, 47.5, 37.9, 30.2, 21.3, 20.5, 19.6, 16.4; **IR** (neat  $\text{cm}^{-1}$ ): 1699, 1622, 1473, 1180, 1142, 1075; **HRMS**(ESI): calcd. for  $\text{C}_{16}\text{H}_{18}\text{NOS}$ :  $[\text{M}-\text{H}]^-$   $m/z$  272.1109, found: 272.1123.

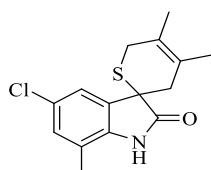

**4c\*a**

**5-chloro-4',5',7-trimethyl-3',6'-dihydrospiro[indoline-3,2'-thiopyran]-2-one.** White solid, 133.3 mg, yield: 91%.  $^1\text{H NMR}$  (600 MHz,  $\text{CDCl}_3$ )  $\delta$  7.96 (s, 1H), 7.04 (d,  $J = 27.6$  Hz, 2H), 3.74 (d,  $J = 16.6$  Hz, 1H), 3.06 (d,  $J = 16.7$  Hz, 1H), 2.51 (s, 2H), 2.24 (s, 3H), 1.87 (s, 3H), 1.76 (s, 3H);  $^{13}\text{C NMR}$  (151 MHz,  $\text{CDCl}_3$ )  $\delta$  179.0, 137.3, 133.4, 130.1, 127.9, 124.5, 123.8, 121.6, 121.0, 47.7, 31.0, 30.2, 20.5, 19.6, 16.4; **IR** (neat  $\text{cm}^{-1}$ ): 1709, 1624, 1463, 1307, 1198, 1180, 1142, 1075; **HRMS**(ESI): calcd. for  $\text{C}_{15}\text{H}_{16}\text{ClNOS}$ :  $[\text{M}-\text{H}]^-$   $m/z$  292.0563, found: 292.0565.

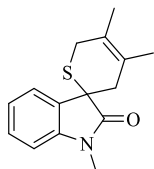

**4pa**

**1,4',5'-trimethyl-3',6'-dihydrospiro[indoline-3,2'-thiopyran]-2-one.** White solid, 107.5 mg, yield: 83%.  $^1\text{H NMR}$  (400 MHz,  $\text{CDCl}_3$ )  $\delta$  7.30 (t,  $J = 7.7$  Hz, 1H), 7.22 (d,  $J = 7.4$  Hz, 1H), 7.06 (t,  $J = 7.5$  Hz, 1H), 6.85 (d,  $J = 7.8$  Hz, 1H), 3.78 (d,  $J = 16.4$  Hz, 1H), 3.22 (s, 3H), 3.06 (d,  $J = 16.8$  Hz, 1H), 2.58 – 2.43 (m, 2H), 1.88 (s, 3H), 1.75 (s, 3H);  $^{13}\text{C NMR}$  (126 MHz,  $\text{CDCl}_3$ )  $\delta$  176.9, 142.8, 131.8, 129.0, 124.7, 123.7, 123.5, 122.9, 108.4, 46.7, 38.0, 30.3, 26.5, 20.6, 19.7; **IR**(neat  $\text{cm}^{-1}$ ): 2922, 1715, 1610, 1492, 1469, 1372, 1342, 1260, 1086, 752; **HRMS**(ESI): calcd for  $\text{C}_{15}\text{H}_{17}\text{NOS}$   $[\text{M}+\text{H}]^+$   $m/z$  260.1109, found: 260.1106  $[\text{M}+\text{H}]^+$ .

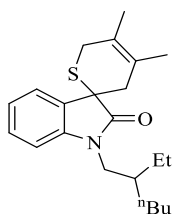

**4qa**

**1-(2-ethylhexyl)-4',5'-dimethyl-3',6'-dihydrospiro[indoline-3,2'-thiopyran]-2-one.** Colorless oil liquid, 151.8 mg, yield: 85%.  $^1\text{H NMR}$  (400 MHz,  $\text{CDCl}_3$ )  $\delta$  7.33 – 7.21 (m, 1H), 7.05 (t,  $J = 7.5$  Hz, 1H), 6.86 (d,  $J = 7.8$  Hz, 1H), 3.80 (d,  $J = 16.8$  Hz, 1H), 3.67 (ddd,  $J = 13.9, 7.9, 5.9$  Hz, 1H), 3.59 – 3.47 (m, 1H), 3.05 (d,  $J = 16.8$  Hz, 1H), 2.53 (q,  $J = 17.5$  Hz, 1H), 1.89 (s, 2H), 1.77 (s, 1H), 1.37 (dt,  $J = 12.5, 9.9, 3.8$  Hz, 4H), 0.93 (ddd,  $J = 19.3, 10.8, 5.9$  Hz, 3H);  $^{13}\text{C NMR}$  (101 MHz,  $\text{CDCl}_3$ )  $\delta$  177.1, 142.6, 131.8, 128.8, 124.66 (d,  $J = 3.03$  Hz), 123.67 (d,  $J = 2.02$  Hz), 123.5, 122.5, 108.8, 46.5, 44.0, 37.96 (d,  $J = 9.09$  Hz), 37.45 (d,  $J = 11.11$  Hz), 30.68 (d,  $J = 10.1$  Hz), 30.20 (d,  $J = 5.05$  Hz), 28.69 (d,  $J = 36.36$  Hz), 24.08 (d,  $J = 9.09$  Hz), 23.13 (d,  $J = 3.03$  Hz), 20.5, 19.7, 14.1, 10.73 (d,  $J = 36.36$  Hz); **IR** (neat  $\text{cm}^{-1}$ ): 2958, 1715, 1610, 1487, 1466, 1348, 1178, 751; **HRMS**(ESI): calcd. for  $\text{C}_{22}\text{H}_{31}\text{NOS}$ :  $[\text{M}+\text{H}]^+$   $m/z$  358.2205, found: 358.2205.

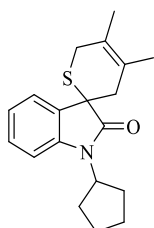

**4ra**

**1-cyclopentyl-4',5'-dimethyl-3',6'-dihydrospiro[indoline-3,2'-thiopyran]-2-one.** White solid, 134.6 mg, yield: 86%.  $^1\text{H NMR}$  (600 MHz,  $\text{CDCl}_3$ )  $\delta$  7.27 – 7.20 (m, 2H), 7.02 (t,  $J = 7.5$  Hz, 1H), 6.93 (d,  $J = 7.9$  Hz, 1H), 3.77 (d,  $J = 16.7$  Hz, 1H), 3.03 (d,  $J = 16.8$  Hz, 1H), 2.58 – 2.44 (m, 2H), 2.12 – 2.02 (m, 2H), 1.93 (dt,  $J = 14.7, 7.5$  Hz, 4H), 1.87 (s, 3H), 1.75 (s, 3H), 1.69 (dd,  $J = 7.2, 4.2$  Hz, 2H);  $^{13}\text{C NMR}$  (151 MHz,  $\text{CDCl}_3$ )  $\delta$  176.6, 141.2, 132.0, 128.4, 124.6, 123.6, 123.5, 122.2, 109.7, 52.4, 46.4, 38.0, 30.1, 27.7, 27.6, 25.3, 20.4, 19.5; **IR** (neat  $\text{cm}^{-1}$ ): 2958, 1708, 1607, 1483, 1465, 1358, 752; **HRMS**(ESI): calcd. for  $\text{C}_{19}\text{H}_{24}\text{NOS}$ :  $[\text{M}+\text{H}]^+$   $m/z$  314.1579, found: 314.1574.

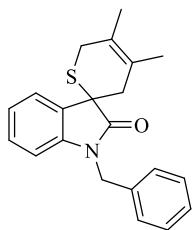

**4sa**

**1-benzyl-4',5'-dimethyl-3',6'-dihydrospiro[indoline-3,2'-thiopyran]-2-one.** Pale yellow solid, 142.4 mg, yield: 85%. <sup>1</sup>H NMR (600 MHz, CDCl<sub>3</sub>) δ 7.29 – 7.24 (m, 4H), 7.22 – 7.19 (m, 2H), 7.13 (td, *J* = 7.8, 1.0 Hz, 1H), 6.98 (t, *J* = 7.5 Hz, 1H), 6.67 (d, *J* = 7.8 Hz, 1H), 4.94 (d, *J* = 15.8 Hz, 1H), 4.80 (d, *J* = 15.8 Hz, 1H), 3.81 (d, *J* = 16.7 Hz, 1H), 3.02 (d, *J* = 16.8 Hz, 1H), 2.58 (d, *J* = 17.5 Hz, 1H), 2.50 (d, *J* = 17.5 Hz, 1H), 1.85 (s, 3H), 1.74 (s, 3H); <sup>13</sup>C NMR (151 MHz, CDCl<sub>3</sub>) δ 176.9, 141.9, 135.9, 131.6, 128.9, 128.9, 127.7, 127.3, 124.7, 124.5, 123.8, 123.6, 123.6, 123.2, 122.9, 109.4, 46.7, 43.7, 37.9, 30.3, 20.6, 19.7; IR (neat cm<sup>-1</sup>): 1721, 1611, 1466, 1348, 1258, 1142, 1076, 801, 751; HRMS(ESI): calcd. for C<sub>21</sub>H<sub>22</sub>NOS: [M+H]<sup>+</sup> m/z 336.1422, found: 336.1416.

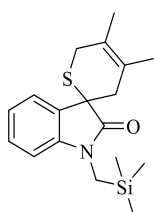

**4va**

**4',5'-dimethyl-1-((trimethylsilyl)methyl)-3',6'-dihydrospiro[indoline-3,2'-thiopyran]-2-one.** White solid, 142.4 mg, yield: 86%. <sup>1</sup>H NMR (600 MHz, CDCl<sub>3</sub>) δ 7.16 (ddd, *J* = 7.7, 6.6, 1.0 Hz, 7H), 7.09 (d, *J* = 7.3 Hz, 6H), 6.90 (t, *J* = 7.5 Hz, 6H), 6.67 (d, *J* = 7.8 Hz, 6H), 3.65 (d, *J* = 16.8 Hz, 6H), 3.18 (d, *J* = 15.4 Hz, 6H), 3.01 (d, *J* = 15.4 Hz, 6H), 2.94 (d, *J* = 16.8 Hz, 6H), 2.06 (s, 1H), 1.76 (s, 18H), 1.63 (s, 18H), -0.00 (s, 52H); <sup>13</sup>C NMR (151 MHz, CDCl<sub>3</sub>) δ 176.2, 143.1, 132.1, 128.7, 124.8, 123.7, 123.3, 122.3, 108.7, 46.5, 37.9, 31.3, 30.2, 20.5, 19.7, -1.3; IR (neat cm<sup>-1</sup>): 1704, 1609, 1196, 1180, 1142, 1075, 848; HRMS(ESI): calcd. for C<sub>18</sub>H<sub>26</sub>NOSSi: [M+H]<sup>+</sup> m/z 332.1504, found: 332.1500.

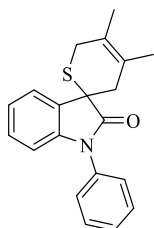

**4wa**

**4',5'-dimethyl-1-phenyl-3',6'-dihydrospiro[indoline-3,2'-thiopyran]-2-one.** Pale yellow solid, 134.9 mg, yield: 84%. <sup>1</sup>H NMR (400 MHz, CDCl<sub>3</sub>) δ 7.51 (dd, *J* = 10.7, 4.6 Hz, 2H), 7.44 (t, *J* = 4.3 Hz, 2H), 7.41 – 7.35 (m, 1H), 7.30 (dd, *J* = 7.4, 0.7 Hz, 1H), 7.23 (td, *J* = 8.2, 1.6 Hz, 1H), 7.10 (dd, *J* = 10.9, 4.1 Hz, 1H), 6.86 (d, *J* = 7.9 Hz, 1H), 3.85 (d, *J* = 16.8 Hz, 1H), 3.04 (d, *J* = 16.8 Hz, 1H), 2.71 (d, *J* = 17.5 Hz, 1H), 2.58 (d, *J* = 17.5 Hz, 1H), 1.87 (s, 3H), 1.78 (s, 3H); <sup>13</sup>C NMR (151 MHz, CDCl<sub>3</sub>) δ 175.9, 142.7, 134.4, 131.3, 129.6, 128.9, 128.1, 126.6, 124.4, 123.8, 123.8, 123.3, 109.7, 46.6, 38.1, 30.4, 20.5, 19.6; IR (neat cm<sup>-1</sup>): 1721, 1670, 1594, 1499, 1465, 1369, 1323, 1164, 752; HRMS(ESI): calcd. for C<sub>20</sub>H<sub>19</sub>BNOS: [M+H]<sup>+</sup> m/z 322.1266, found: 322.1270..

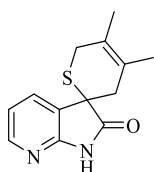

**4d\*a**

**4',5'-dimethyl-3',6'-dihydrospiro[pyrrolo[2,3-b]pyridine-3,2'-thiopyran]-2(1H)-one.** Pale yellow solid, 110.7 mg, yield: 90%. <sup>1</sup>H NMR (600 MHz, CDCl<sub>3</sub>) δ 8.22 – 8.17 (m, 2H), 7.44 (dd, *J* = 7.4, 1.4 Hz, 2H), 6.97 (td, *J* = 7.6, 3.7 Hz, 2H), 3.71



(d,  $J = 16.8$  Hz, 2H), 3.09 (t,  $J = 16.5$  Hz, 2H), 2.62 (d,  $J = 17.3$  Hz, 2H), 2.49 (d,  $J = 17.3$  Hz, 2H), 1.92 – 1.85 (m, 7H), 1.76 (s, 6H);  $^{13}\text{C NMR}$  (151 MHz,  $\text{CDCl}_3$ )  $\delta$  177.4, 155.5, 146.9, 131.6, 127.2, 124.7, 123.9, 118.4, 47.2, 37.4, 30.2, 20.5, 19.7; **IR** (neat  $\text{cm}^{-1}$ ): 1731, 1606, 1519, 1471, 1435, 1216, 1110, 778; **HRMS**(ESI): calcd. for  $\text{C}_{13}\text{H}_{13}\text{N}_2\text{OS}$ .  $[\text{M}+\text{H}]^+$   $m/z$  245.0749, found: 245.0756.

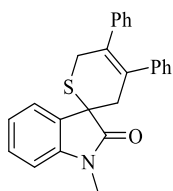

**4pb**

**1-methyl-4',5'-diphenyl-3',6'-dihydrospiro[indoline-3,2'-thiopyran]-2-one.** Pale yellow solid, 160.9 mg, yield: 84%.  $^1\text{H NMR}$  (400 MHz,  $\text{CDCl}_3$ )  $\delta$  7.41 – 7.29 (m, 2H), 7.09 (dtd,  $J = 21.5, 14.7, 7.7$  Hz, 11H), 6.90 (d,  $J = 7.8$  Hz, 1H), 4.24 (d,  $J = 17.0$  Hz, 1H), 3.59 (d,  $J = 17.0$  Hz, 1H), 3.28 (s, 3H), 3.12 – 2.93 (m, 2H);  $^{13}\text{C NMR}$  (151 MHz,  $\text{CDCl}_3$ )  $\delta$  176.8, 142.9, 142.7, 142.1, 134.0, 133.7, 131.4, 129.3, 129.3, 129.2, 128.1, 127.9, 126.7, 126.5, 123.8, 123.0, 108.5, 47.2, 39.1, 31.1, 26.6; **IR** (neat  $\text{cm}^{-1}$ ): 1712, 1611, 1491, 1470, 1442, 1418, 1371, 1344, 1180, 752; **HRMS**(ESI): calcd. for  $\text{C}_{25}\text{H}_{22}\text{NOS}$ .  $[\text{M}+\text{H}]^+$   $m/z$  384.1422, found: 384.1413.

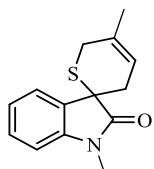

**4pc**

**1,5'-dimethyl-3',6'-dihydrospiro[indoline-3,2'-thiopyran]-2-one.** Pale yellow solid.  $^1\text{H NMR}$  (400 MHz,  $\text{CDCl}_3$ )  $\delta$  7.43 – 7.12 (m, 2H), 7.06 (tdd,  $J = 7.6, 2.1, 1.0$  Hz, 1H), 6.85 (d,  $J = 7.8$  Hz, 1H), 5.66 (ddd,  $J = 4.7, 3.1, 1.6$  Hz, 1H), 3.82 – 3.71 (m, 1H), 3.22 (s, 3H), 3.02 (d,  $J = 16.8$  Hz, 1H), 2.62 (m, 3H), 1.90 (s, 3H);  $^{13}\text{C NMR}$  (151 MHz,  $\text{CDCl}_3$ )  $\delta$  176.7, 142.9, 131.3, 131.0, 129.1, 123.5, 122.8, 119.5, 108.4, 44.9, 32.2, 28.8, 26.4, 24.5; **HRMS**(ESI): calcd. for  $\text{C}_{14}\text{H}_{15}\text{NOS}$ .  $[\text{M}+\text{H}]^+$   $m/z$  246.0953, found: 246.0952.

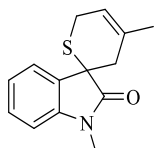

**4pc'**

**1,4'-dimethyl-3',6'-dihydrospiro[indoline-3,2'-thiopyran]-2-one.** Pale yellow solid.  $^1\text{H NMR}$  (400 MHz,  $\text{CDCl}_3$ )  $\delta$  7.43 – 7.12 (m, 2H), 7.06 (tdd,  $J = 7.6, 2.1, 1.0$  Hz, 1H), 6.85 (d,  $J = 7.8$  Hz, 1H), 5.86 (ddd,  $J = 4.9, 3.2, 1.6$  Hz, 1H), 3.76 (d,  $J = 1.0$  Hz, 1H), 3.22 (s,  $J = 1.2$  Hz, 3H), 3.16 (m, 1H), 3.00 (s, 1H), 2.45 (t,  $J = 14.8$  Hz, 2H), 1.81 (s, 3H);  $^{13}\text{C NMR}$  (151 MHz,  $\text{CDCl}_3$ )  $\delta$  176.5, 142.7, 132.5, 131.4, 128.9, 123.4, 122.8, 117.8, 108.2, 46.1, 35.8, 26.3, 25.2, 24.8; **HRMS**(ESI): calcd. for  $\text{C}_{14}\text{H}_{15}\text{NOS}$ .  $[\text{M}+\text{H}]^+$   $m/z$  246.0953, found: 246.0952.

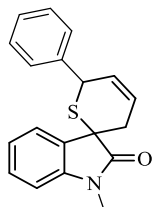

**4pd**

**1-methyl-6'-phenyl-3',6'-dihydrospiro[indoline-3,2'-thiopyran]-2-one.** Pale yellow solid, 84.5 mg, yield: 55%.  $^1\text{H NMR}$  (400 MHz,  $\text{CDCl}_3$ )  $\delta$  7.47 (d,  $J = 7.3$  Hz, 1H), 7.26 (dd,  $J = 14.2, 6.6$  Hz, 1H), 7.19 – 6.99 (m, 4H), 6.91 (d,  $J = 6.9$  Hz, 2H), 6.56 (d,  $J = 7.7$  Hz, 1H), 6.34 – 6.17 (m, 1H), 5.99 (d,  $J = 10.9$  Hz, 1H), 4.29 (t,  $J = 15.3$  Hz, 1H), 4.24 (s, 1H), 3.21 – 3.05 (m, 1H), 2.86 (s, 3H);  $^{13}\text{C NMR}$  (151 MHz,  $\text{CDCl}_3$ )  $\delta$  174.8, 143.3, 138.3, 129.4, 129.2, 129.2, 127.7, 127.1, 124.8, 123.8,

122.5, 107.9, 49.0, 48.2, 25.8, 25.1; **IR** (neat  $\text{cm}^{-1}$ ): 3446, 1708, 1611, 1493, 1470, 1373, 1180, 1142, 753; **HRMS**(ESI): calcd. for  $\text{C}_{19}\text{H}_{17}\text{NNaOS}$ :  $[\text{M}+\text{Na}]^+$   $m/z$  330.0929, found: 330.0929.

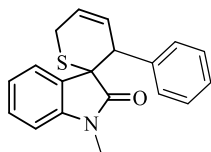

**4pd'**

**1-methyl-3'-phenyl-3',6'-dihydrospiro[indoline-3,2'-thiopyran]-2-one.** Pale yellow solid, 53.7 mg, yield: 35%.  **$^1\text{H}$  NMR** (600 MHz,  $\text{CDCl}_3$ )  $\delta$  7.16 (tt,  $J = 7.4, 3.7$  Hz, 1H), 7.14 – 7.09 (m, 3H), 7.07 – 7.02 (m, 2H), 6.88 – 6.83 (m, 1H), 6.72 (d,  $J = 7.4$  Hz, 1H), 6.65 (d,  $J = 7.8$  Hz, 1H), 6.32 – 6.21 (m, 1H), 6.10 – 6.04 (m, 1H), 4.22 – 4.07 (m, 1H), 3.66 (tt,  $J = 36.1, 18.0$  Hz, 1H), 3.56 (dd,  $J = 17.9, 1.2$  Hz, 1H), 3.10 (s, 3H);  **$^{13}\text{C}$  NMR** (151 MHz,  $\text{CDCl}_3$ )  $\delta$  175.5, 142.5, 139.0, 130.5, 130.1, 129.7, 127.7, 127.3, 125.2, 124.4, 122.2, 108.2, 50.9, 45.9, 26.5, 25.1; **IR** (neat  $\text{cm}^{-1}$ ): 3441, 1710, 1609, 1491, 1470, 1372, 1180, 1141, 753; **HRMS**(ESI): calcd. for  $\text{C}_{19}\text{H}_{17}\text{NNaOS}$ :  $[\text{M}+\text{Na}]^+$   $m/z$  330.0929, found: 330.0930.

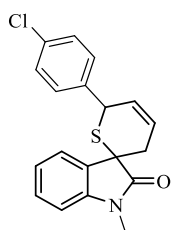

**4pe**

**6'-(4-chlorophenyl)-1-methyl-3',6'-dihydrospiro[indoline-3,2'-thiopyran]-2-one.** Pale yellow solid, 104.0 mg, yield: 61%.  **$^1\text{H}$  NMR** (600 MHz,  $\text{CDCl}_3$ )  $\delta$  7.41 (d,  $J = 7.3$  Hz, 1H), 7.23 (t,  $J = 7.7$  Hz, 1H), 7.10 (t,  $J = 7.5$  Hz, 1H), 6.99 (d,  $J = 8.4$  Hz, 1H), 6.82 (d,  $J = 8.4$  Hz, 1H), 6.57 (d,  $J = 7.7$  Hz, 1H), 6.28 – 6.17 (m, 1H), 5.88 (d,  $J = 10.9$  Hz, 1H), 4.25 (d,  $J = 17.4$  Hz, 1H), 4.18 (s, 1H), 3.14 – 3.01 (m, 1H), 2.87 (s, 1H);  **$^{13}\text{C}$  NMR** (151 MHz,  $\text{CDCl}_3$ )  $\delta$  174.5, 143.1, 136.9, 132.9, 130.7, 129.3, 128.8, 128.5, 127.8, 125.1, 123.6, 122.5, 48.7, 47.3, 25.8, 25.0; **IR** (neat  $\text{cm}^{-1}$ ): 3446, 1712, 1605, 1490, 1470, 1409, 1372, 1193, 1180, 1142, 1076, 753; **HRMS**(ESI): calcd. for  $\text{C}_{19}\text{H}_{17}\text{ClNOS}$ :  $[\text{M}+\text{H}]^+$   $m/z$  342.0719, found: 342.0715.

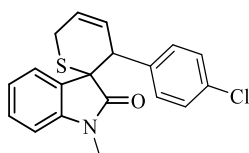

**4pe'**

**3'-(4-chlorophenyl)-1-methyl-3',6'-dihydrospiro[indoline-3,2'-thiopyran]-2-one.** Pale yellow solid, 52.9 mg, yield: 31%.  **$^1\text{H}$  NMR** (600 MHz,  $\text{CDCl}_3$ )  $\delta$  7.18 (td,  $J = 7.7, 1.1$  Hz, 1H), 7.07 (d,  $J = 8.5$  Hz, 2H), 6.97 (d,  $J = 8.4$  Hz, 2H), 6.89 (td,  $J = 7.6, 0.8$  Hz, 1H), 6.80 (d,  $J = 7.2$  Hz, 1H), 6.68 (d,  $J = 7.7$  Hz, 1H), 6.32 – 6.24 (m, 1H), 6.02 (dd,  $J = 10.8, 2.9$  Hz, 1H), 4.19 (d,  $J = 23.6$  Hz, 1H);  **$^{13}\text{C}$  NMR** (151 MHz,  $\text{CDCl}_3$ )  $\delta$  175.17, 142.46, 137.57, 133.15, 131.36, 130.07, 129.44, 128.75, 127.91, 125.01, 124.84, 122.36, 108.44, 50.79, 45.36, 26.53, 25.11; **IR** (neat  $\text{cm}^{-1}$ ): 3444, 1709, 1609, 1490, 1470, 1409, 1372, 1180, 1142, 1076, 753; **HRMS**(ESI): calcd. for  $\text{C}_{19}\text{H}_{17}\text{ClNOS}$ :  $[\text{M}+\text{H}]^+$   $m/z$  342.0719, found: 342.0712.

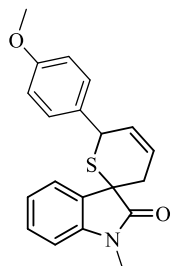

**4pf**

**6'-(4-methoxyphenyl)-1-methyl-3',6'-dihydrospiro[indoline-3,2'-thiopyran]-2-one.** Pale yellow solid, 97.4 mg, yield: 76%.  **$^1\text{H}$  NMR** (400 MHz,  $\text{CDCl}_3$ )  $\delta$  7.45 (d,  $J = 7.3$  Hz, 1H), 7.26 (d,  $J = 6.6$  Hz, 1H), 7.12 (t,  $J = 7.5$  Hz, 1H), 6.82 (d,  $J =$

8.7 Hz, 2H), 6.58 (d,  $J = 8.6$  Hz, 3H);  $^{13}\text{C}$  NMR (101 MHz,  $\text{CDCl}_3$ )  $\delta$  175.0, 158.6, 143.4, 130.5, 130.5, 129.6, 129.4, 129.2, 124.7, 123.8, 122.5, 113.1, 108.0, 55.2, 49.0, 47.3, 25.9, 25.1; IR (neat  $\text{cm}^{-1}$ ): 3445, 1635, 1609, 1510, 1257, 1180, 1142; HRMS(ESI): calcd. for  $\text{C}_{20}\text{H}_{19}\text{NnaO}_2\text{S}$ :  $[\text{M}+\text{Na}]^+$   $m/z$  360.1034, found: 360.1026.

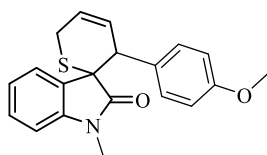

**4pf'**

**3'-(4-methoxyphenyl)-1-methyl-3',6'-dihydrospiro[indoline-3,2'-thiopyran]-2-one.** Pale yellow solid, 16.7 mg, yield: 13%.  $^1\text{H}$  NMR (400 MHz,  $\text{CDCl}_3$ )  $\delta$  7.22 – 7.11 (m, 1H), 6.96 (d,  $J = 8.6$  Hz, 2H), 6.87 (t,  $J = 7.6$  Hz, 1H), 6.75 (d,  $J = 7.5$  Hz, 1H), 6.65 (t,  $J = 9.2$  Hz, 3H), 6.25 (ddd,  $J = 10.6, 6.5, 3.8$  Hz, 1H), 6.05 (dd,  $J = 10.9, 2.9$  Hz, 1H), 4.11 (dd,  $J = 7.4, 4.8$  Hz, 1H), 3.72 (s, 3H), 3.66 (ddd,  $J = 8.5, 4.4, 2.1$  Hz, 1H), 3.58 – 3.48 (m, 1H);  $^{13}\text{C}$  NMR (101 MHz,  $\text{CDCl}_3$ )  $\delta$  175.6, 158.8, 142.6, 131.2, 131.2, 130.8, 129.9, 128.5, 125.3, 124.2, 122.2, 113.1, 108.2, 55.3, 51.0, 45.1, 26.5, 25.2; IR (neat  $\text{cm}^{-1}$ ): 3445, 1709, 1609, 1491, 1470, 1372, 1180, 1142, 753; HRMS(ESI): calcd. for  $\text{C}_{20}\text{H}_{19}\text{NnaO}_2\text{S}$ :  $[\text{M}+\text{Na}]^+$   $m/z$  360.1034, found: 360.1028.

## 10. References

- [1] Zhou H, Zhang R, Zhang H, et al., *Catal. Sci. Technol.*, 2019, **9**, 1457-1463.
- [2] Vazdar K, Kunetskiy R, Saame J, et al., Jahn, *Angew. Chem., Int. Ed.*, 2014, **53**, 1435-1438.
- [3] Mironova E V, Bogdanov A V, Krivolapov D B, et al., *J Mol Struct.*, 2015, **1079**, 87-93.
- [4] Yasukawa N, Yokoyama H, Masuda M, et al., *Green Chem.*, 2018, **20**, 1213-1217.
- [5] SHELXTL PC; Siemens Analytical X-ray Instruments, Madison, WI, **1993**.
- [6] Sheldrick, G. M. SHELXTL Structure Determination Programs, version 5.0, PC; Siemens Analytical Systems, Madison, WI, **1994**.
- [7] (a) Vedejs E, Stults J S, Wilde R G, *J. Am. Chem. Soc.*, 1988, **110**, 5452-5460; (b) Metzner P, *Synthesis.*, 1992, **12**, 1185-1199; (c) Maciejewski A, Steer R P, *Chem. Rev.*, 1993, **93**, 67-98; (d) Heras M, Gulea M, Masson S, et al., *Eur. J. Org. Chem.*, 2004, **2004**, 160-172.
- [8] (a) Wang M, Jiang X, *Top. Curr. Chem.*, 2018, **376**, 14; (b) Williams C R, Harpp D N, *Tetrahedron Lett.*, 1991, **32**, 7651-7654.
- [9] (a) K. Steliou, P. Salama, D. Brodeur and Y. Gareau, *J. Am. Chem. Soc.*, 1987, **109**, 926-927; (b) S. L. Tardif, C. R. Williams and D. N. Harpp, *J. Am. Chem. Soc.*, 1995, **117**, 9067-9068.
- [10] Davison E K, Hume P A, Sperry J, *Org. Lett.*, 2018, **20**, 3545-3548.
- [11] M. J. Frisch, G. W. Trucks, H. B. Schlegel, G. E. Scuseria, M. A. Robb, J. R. Cheeseman, G. Scalmani, V. Barone, G. A. Petersson, H. Nakatsuji, X. Li, M. Caricato, A. V. Marenich, J. Bloino, B. G. Janesko, R. Gomperts, B. Mennucci, H. P. Hratchian, J. V. Ortiz, A. F. Izmaylov, J. L. Sonnenberg, D. Williams-Young, F. Ding, F. Lipparini, F. Egidi, J. Goings, B. Peng, A. Petrone, T. Henderson, D. Ranasinghe, V. G. Zakrzewski, J. Gao, N. Rega, G. Zheng, W. Liang, M. Hada, M. Ehara, K. Toyota, R. Fukuda, J. Hasegawa, M. Ishida, T. Nakajima, Y. Honda, O. Kitao, H. Nakai, T. Vreven, K. Throssell, J. A. Montgomery, Jr., J. E. Peralta, F. Ogliaro, M. J. Bearpark, J. J. Heyd, E. N. Brothers, K. N. Kudin, V. N. Staroverov, T. A. Keith, R. Kobayashi, J. Normand, K. Raghavachari, A. P. Rendell, J. C. Burant, S. S. Iyengar, J. Tomasi, M. Cossi, J. M. Millam, M. Klene, C. Adamo, R. Cammi, J. W. Ochterski, R. L. Martin, K. Morokuma, O. Farkas, J. B. Foresman, and D. J. Fox, Gaussian, Inc., Wallingford CT, 2016.
- [12] Zhang H-h, Wang Y-q, Huang L-t, et al., *Chem Comm.*, 2018, **54**, 8265-8268.
- [13] M. Liu, S. Qiu, Y. Ye, G. Yin, *Tetrahedron Lett.*, 2016, **57**, 5856-5858.
- [14] Y. Y. Gui, J. Yang, L. W. Qi, X. Wang, F. Tian, X. N. Li, L. Peng, L. X. Wang, *Org. Biomol. Chem.*, 2015, **9**, 6371-6379

# 11. NMR spectra

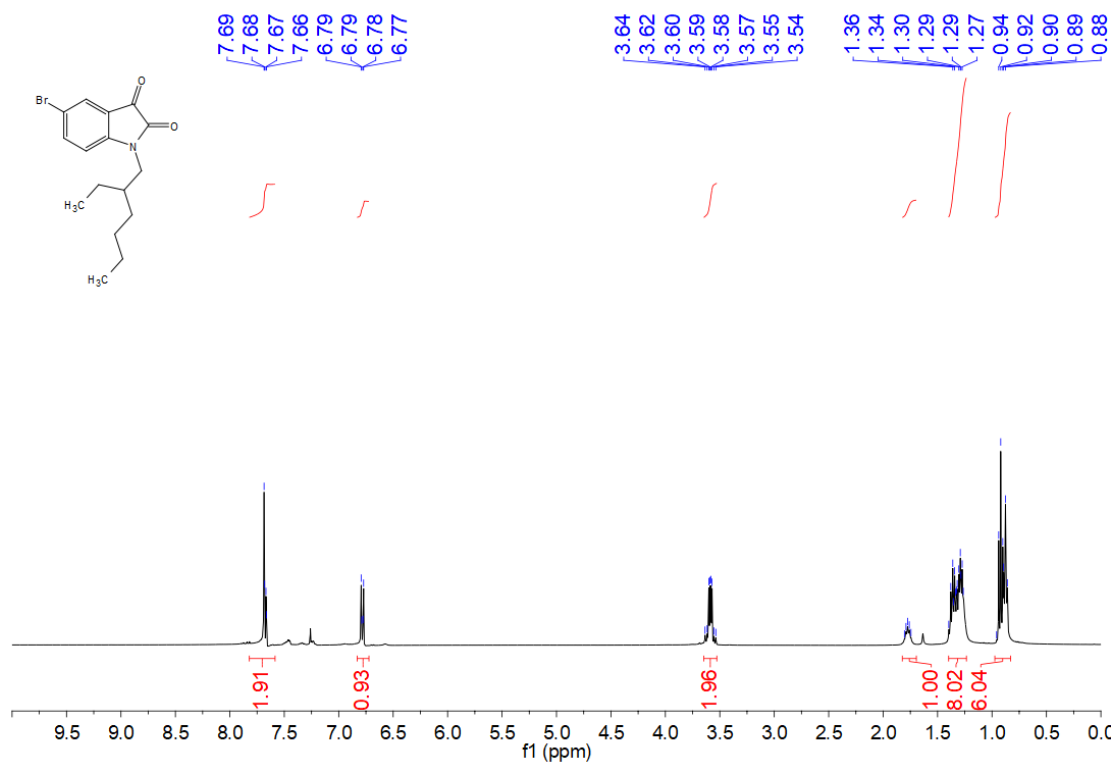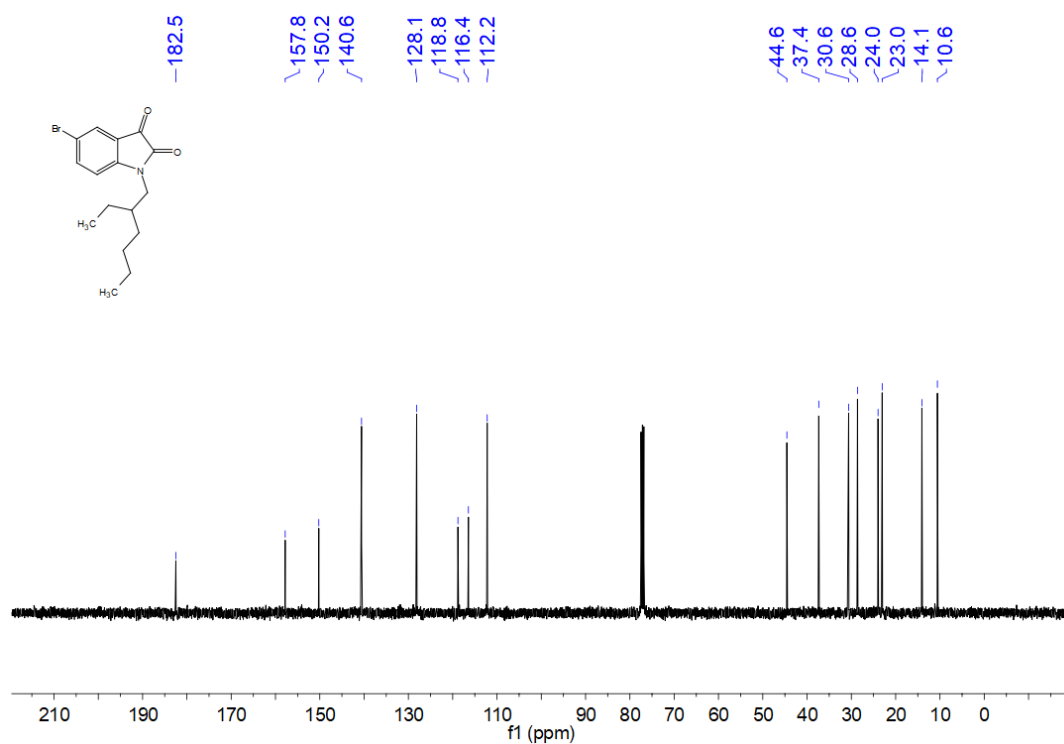

**<sup>13</sup>C NMR spectrum of *N*-(2-ethylhexyl)-5-bromoisatin (101 MHz, CDCl<sub>3</sub>)**

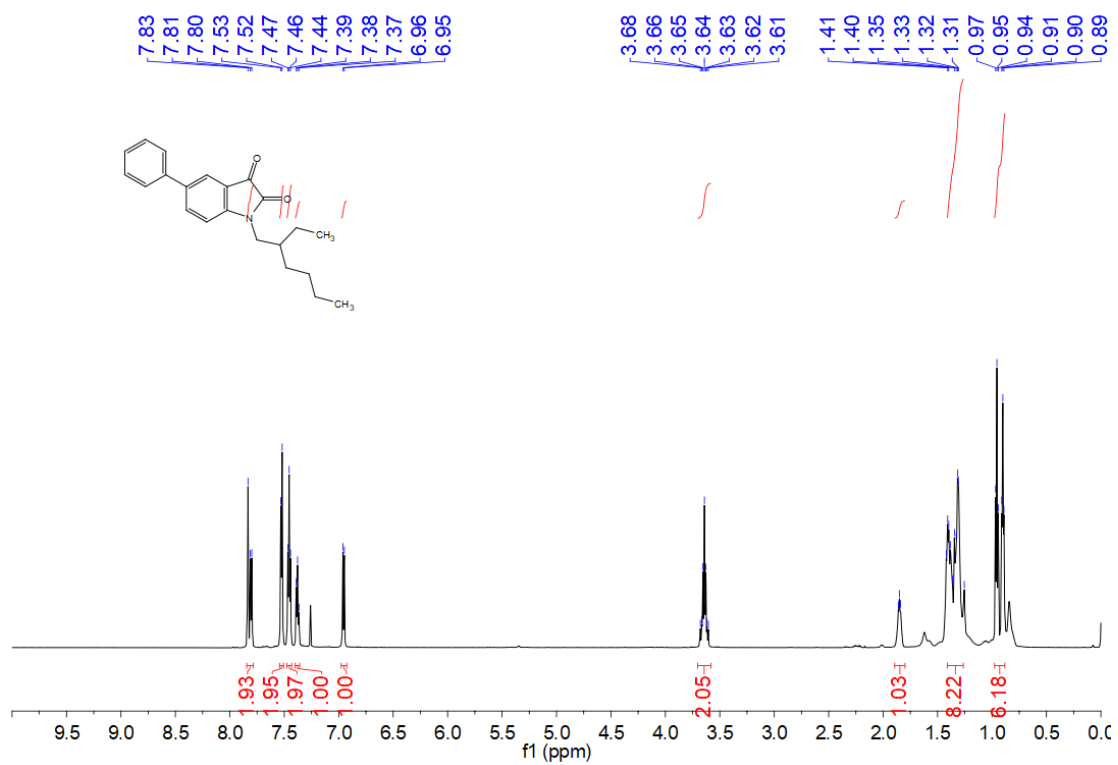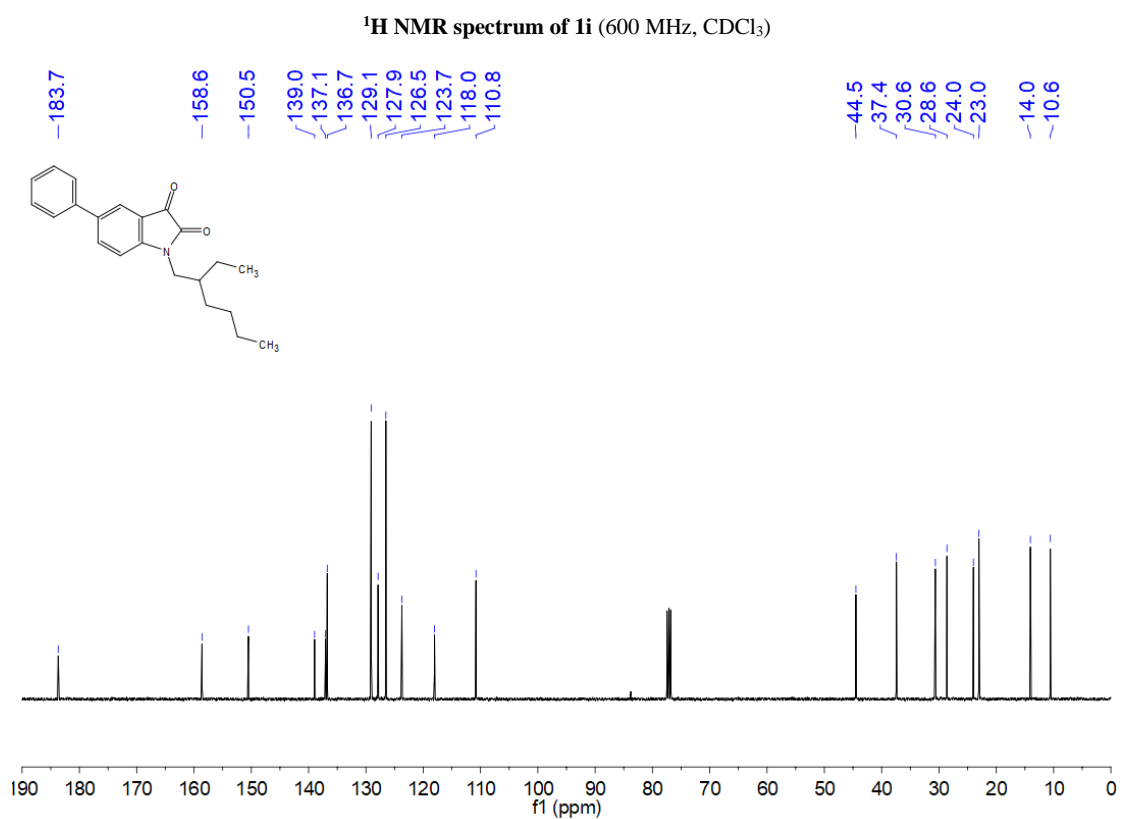

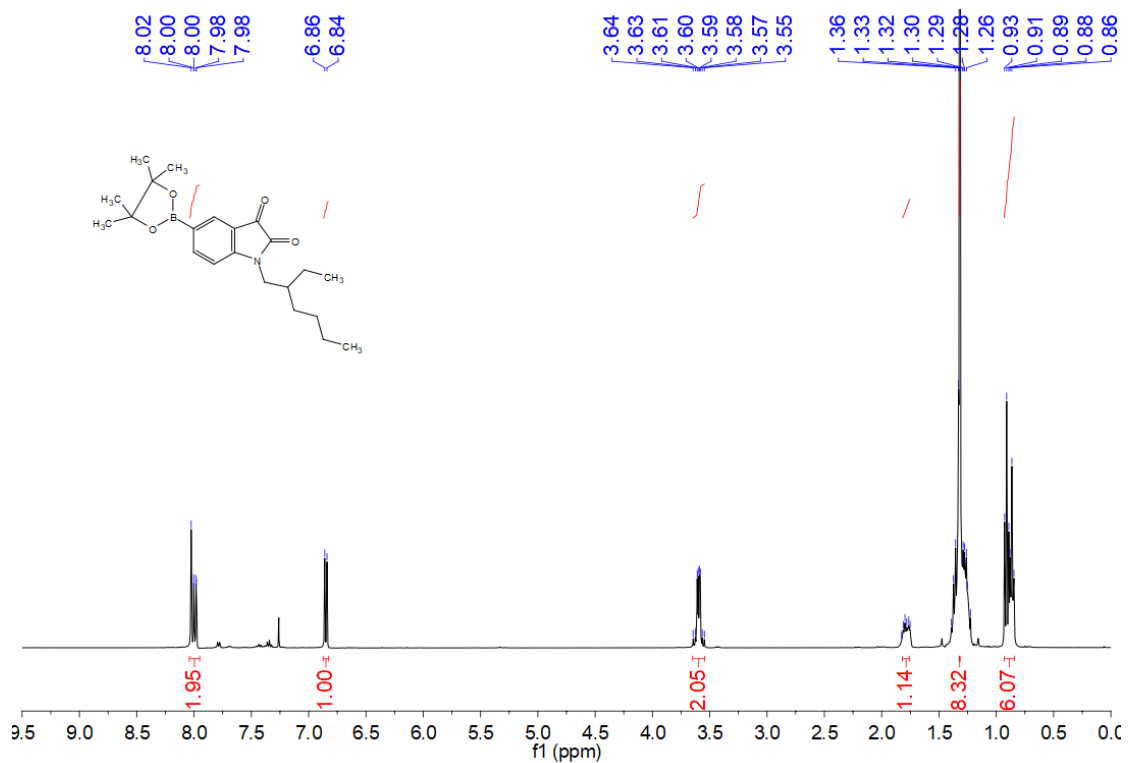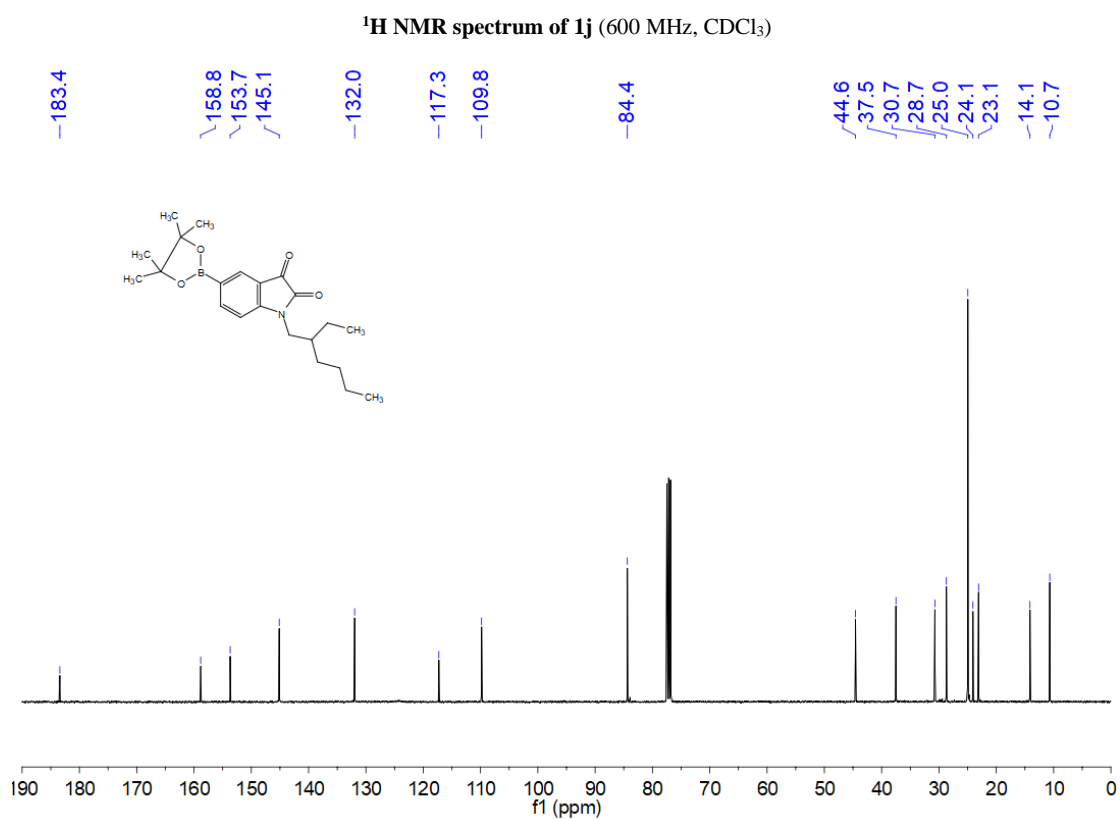

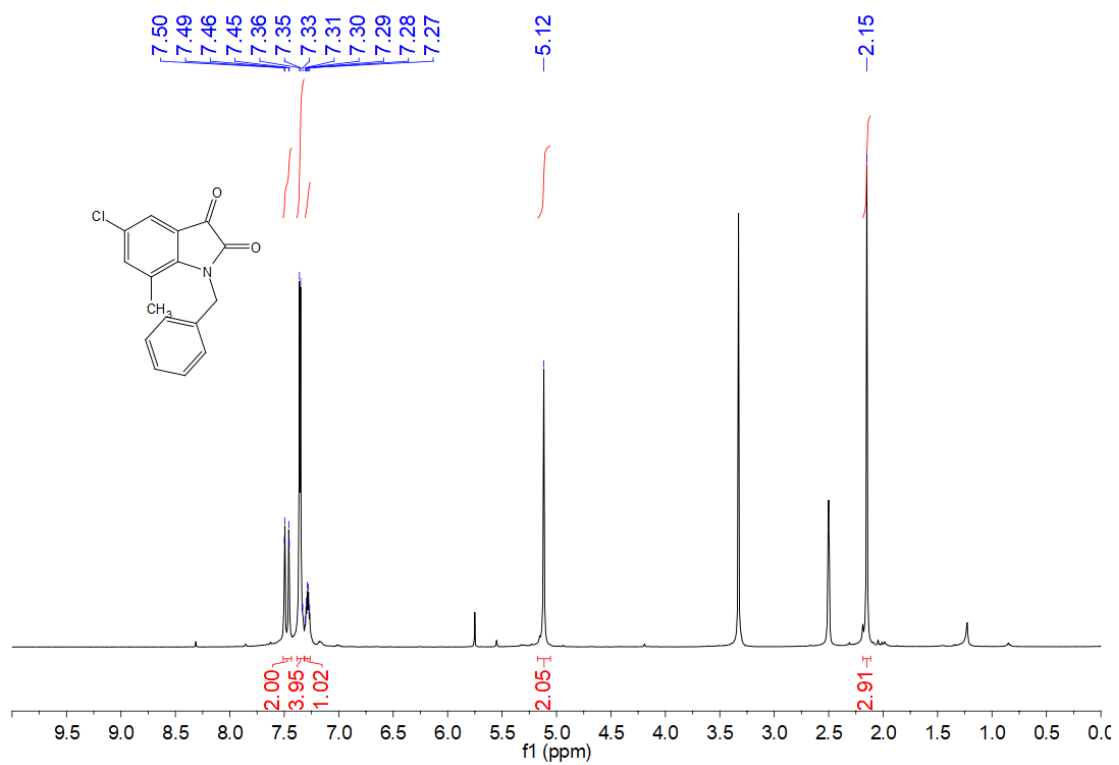

<sup>1</sup>H NMR spectrum of 1o (400 MHz, CDCl<sub>3</sub>)

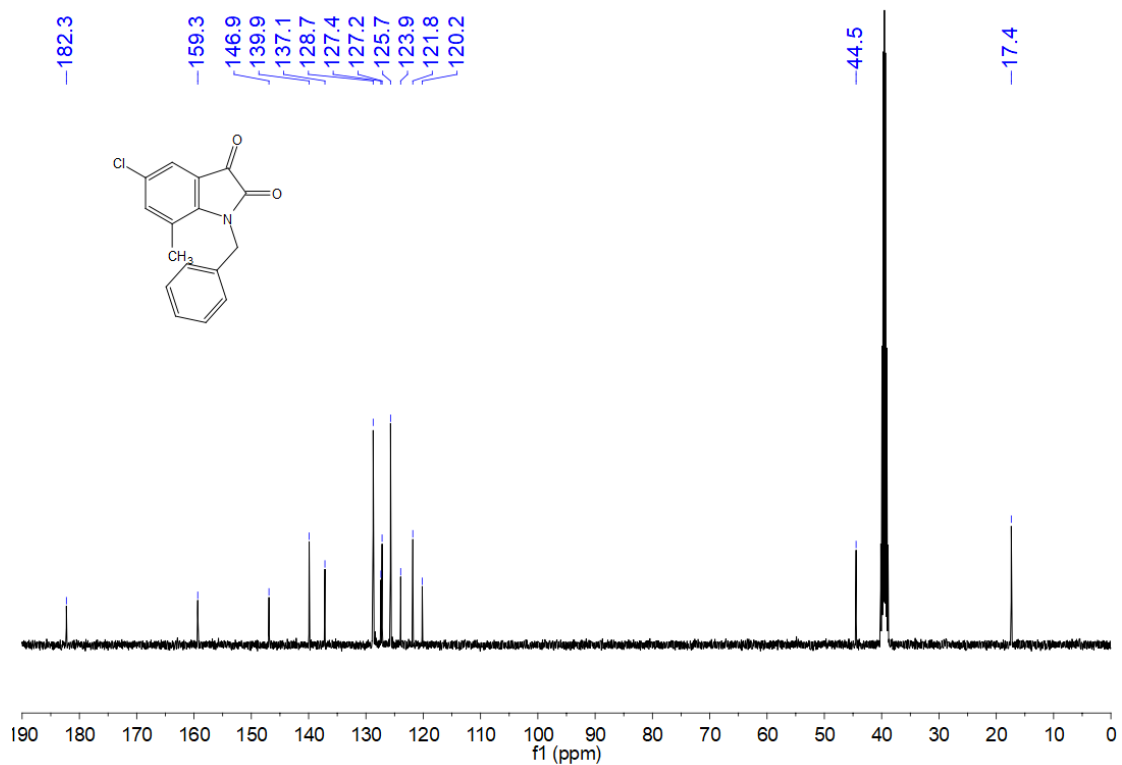

<sup>13</sup>C NMR spectrum of 1o (101 MHz, CDCl<sub>3</sub>)

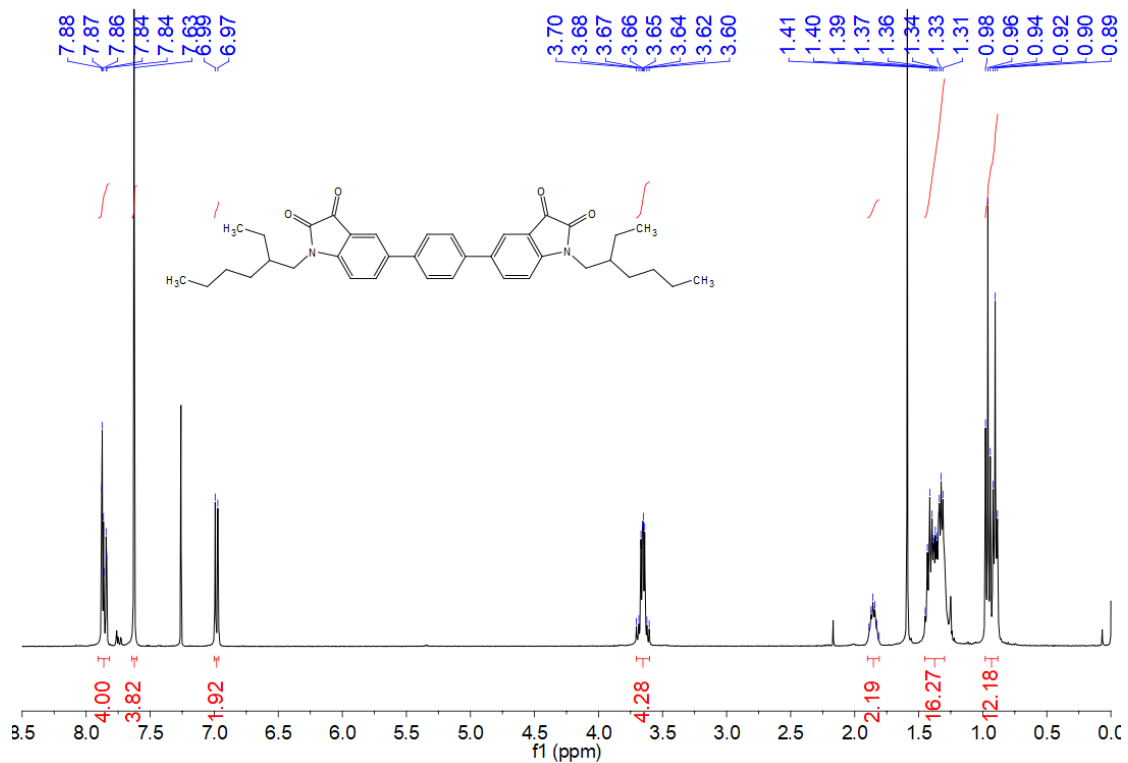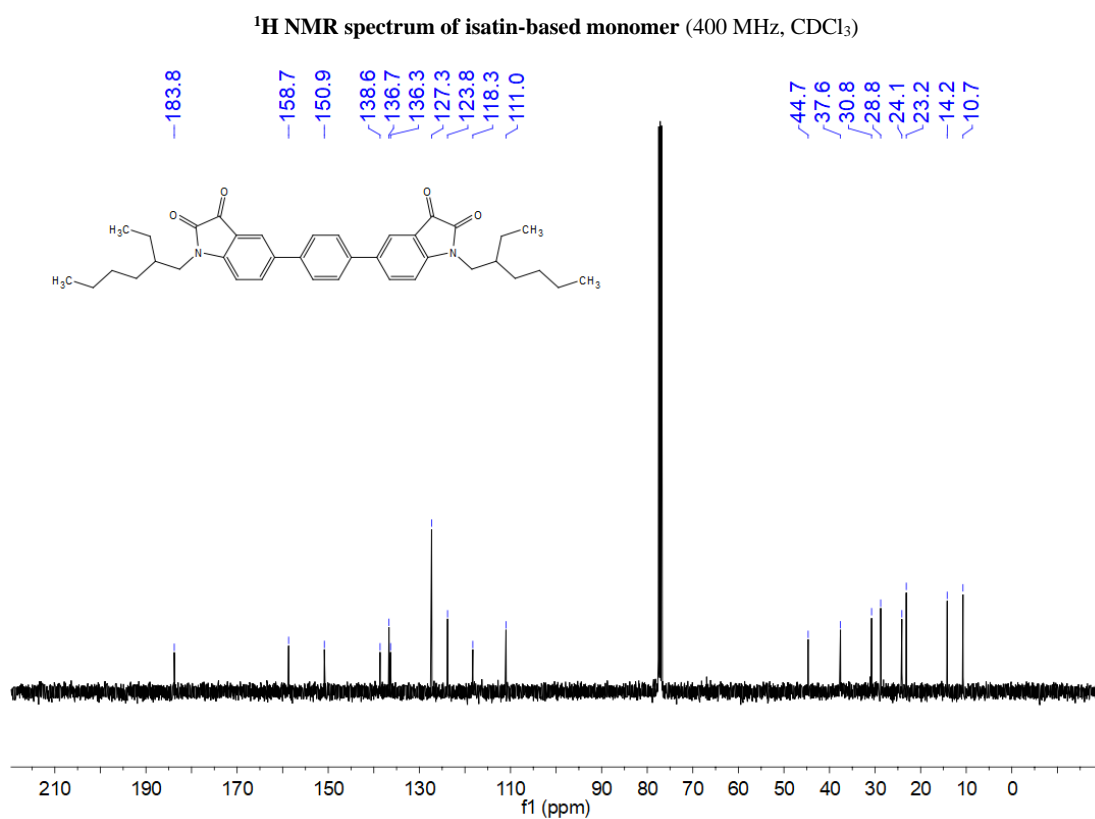



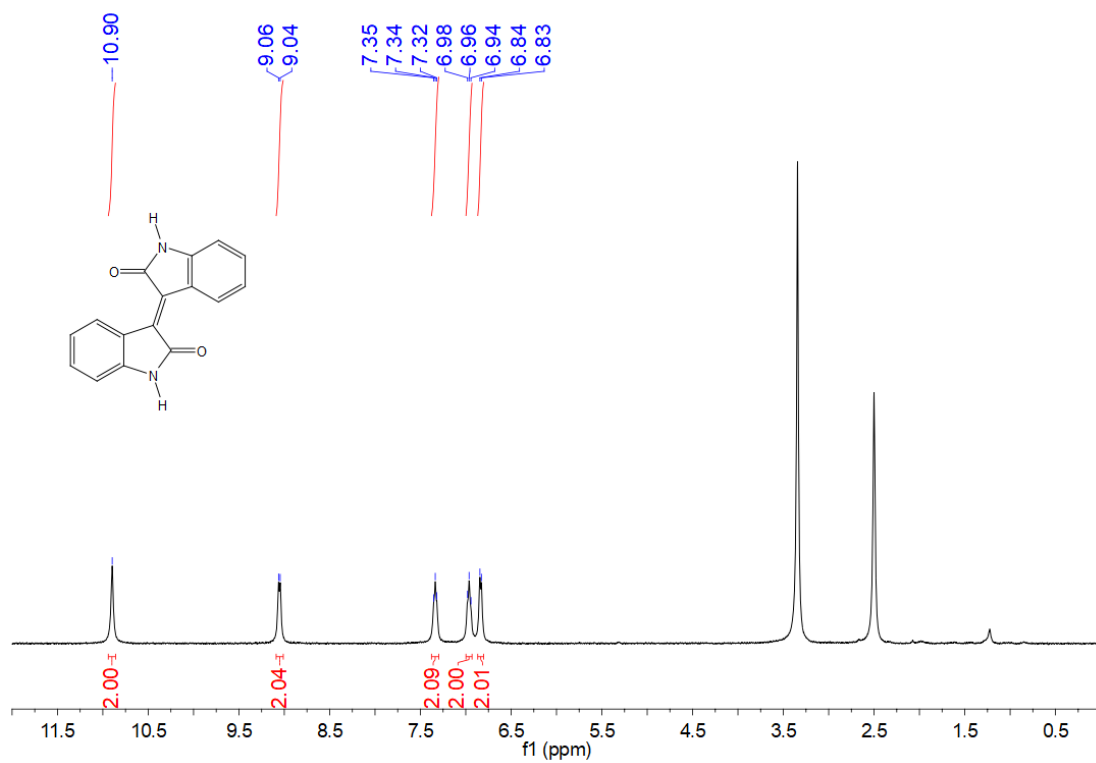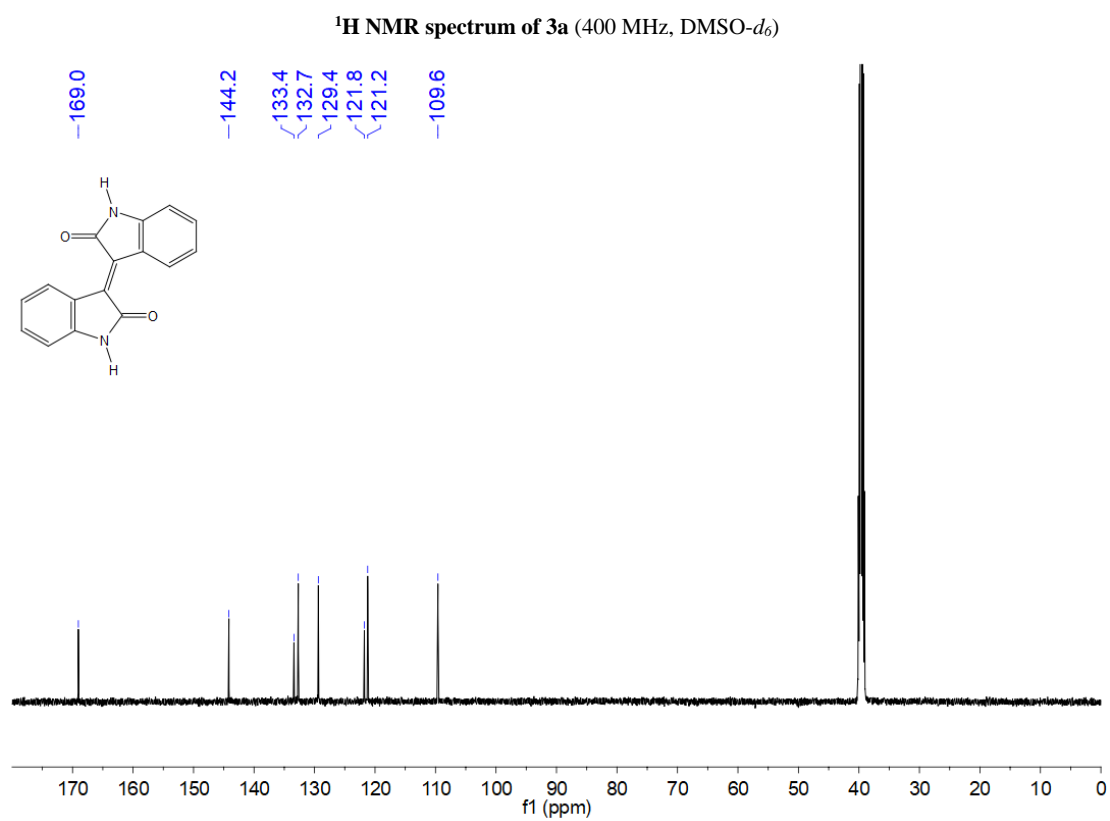

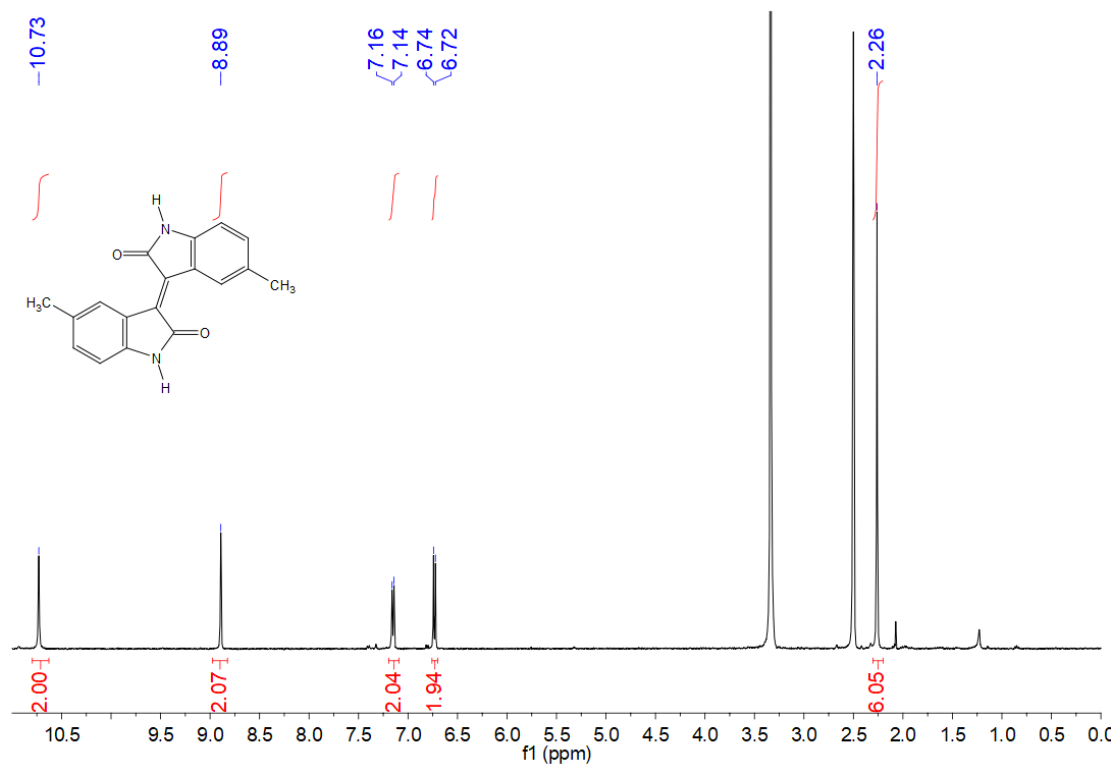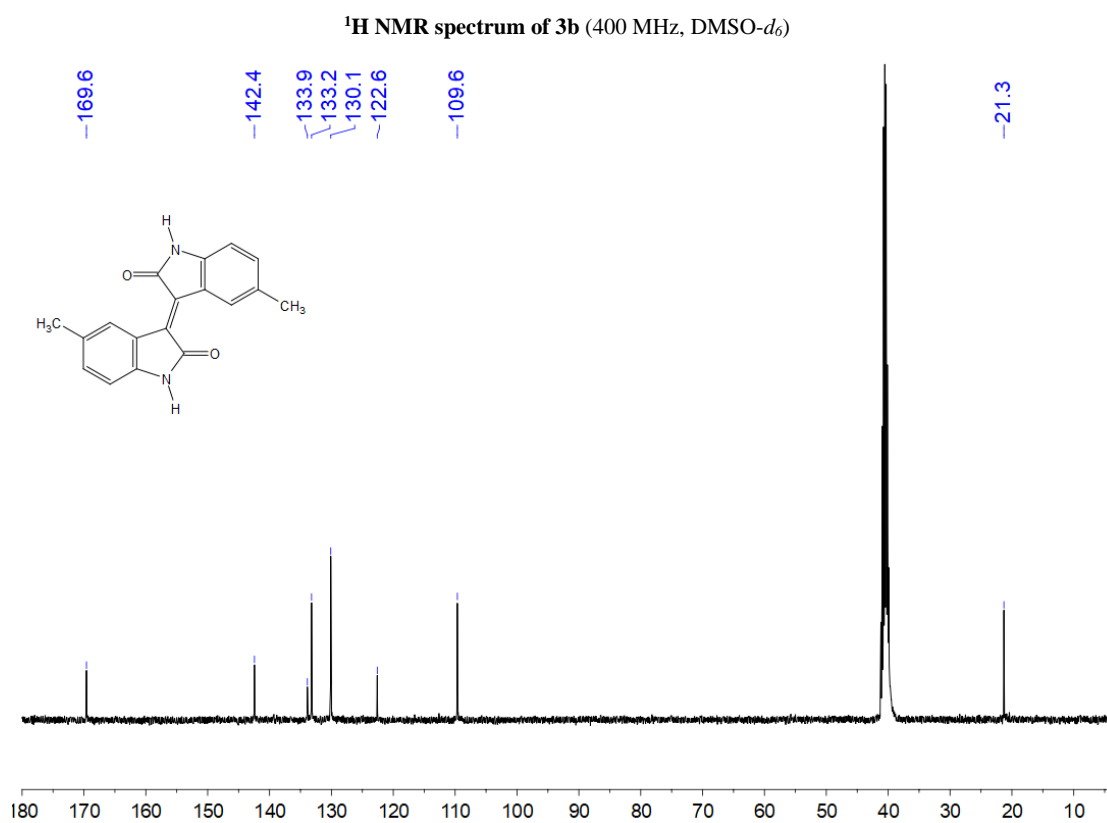

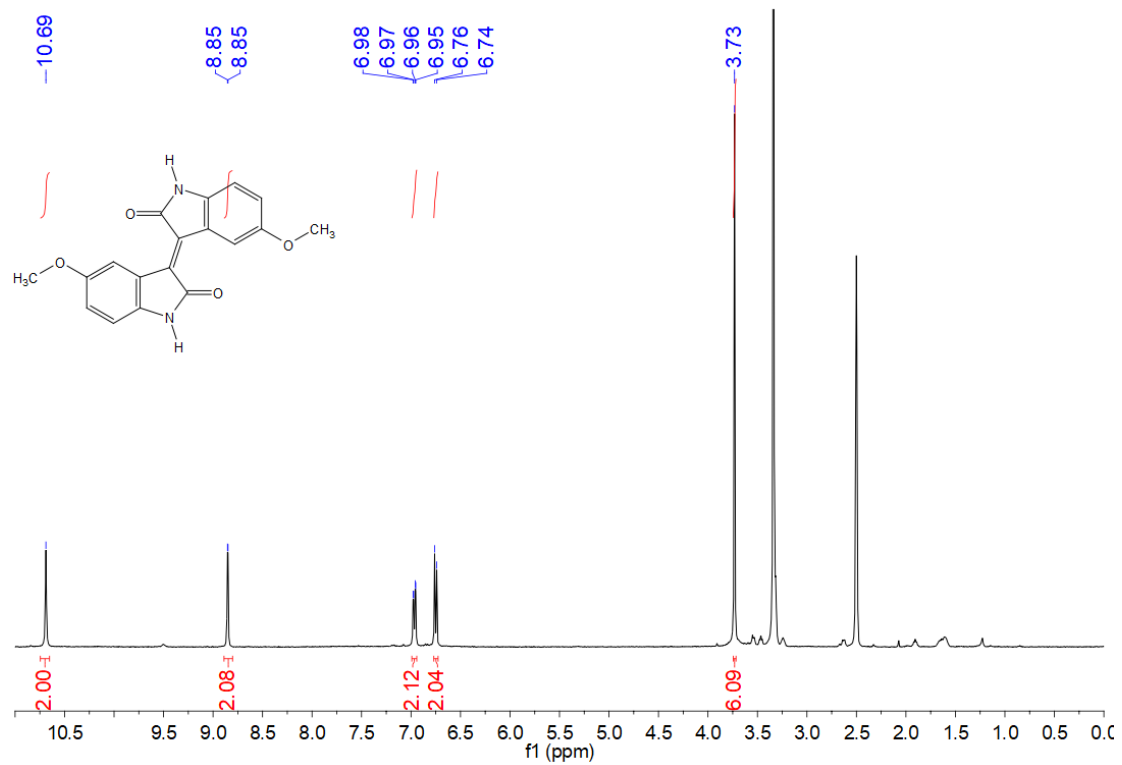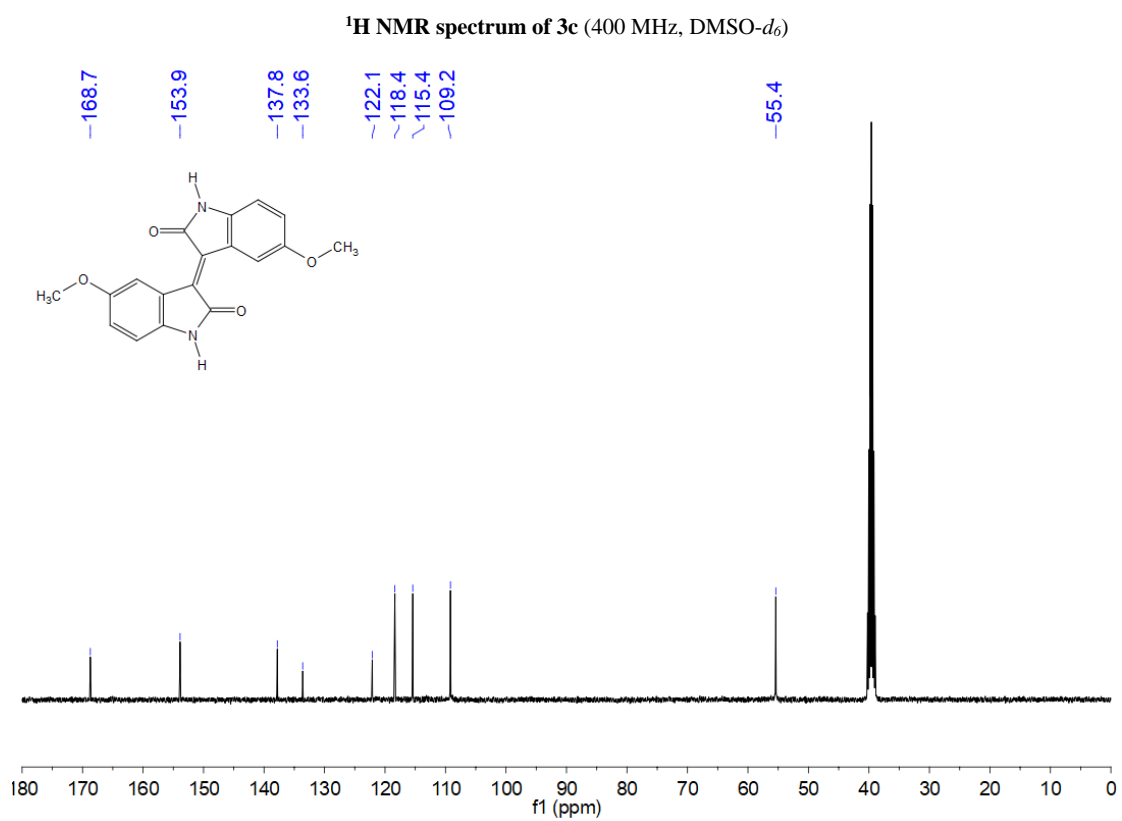

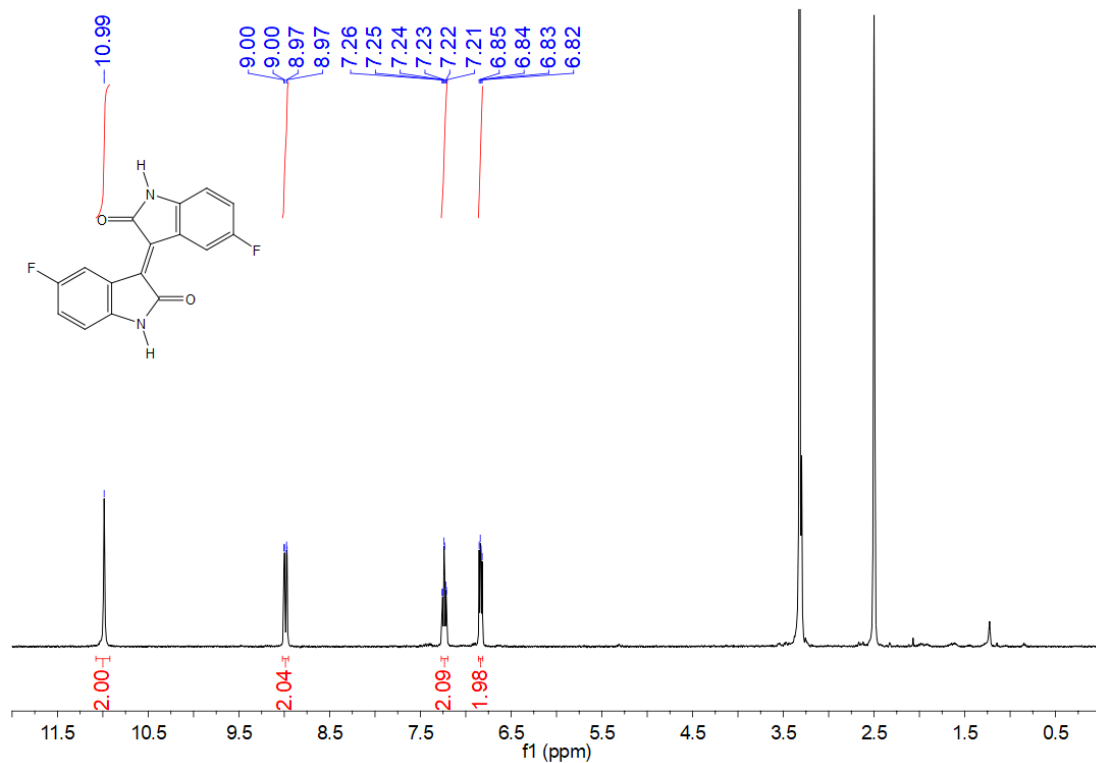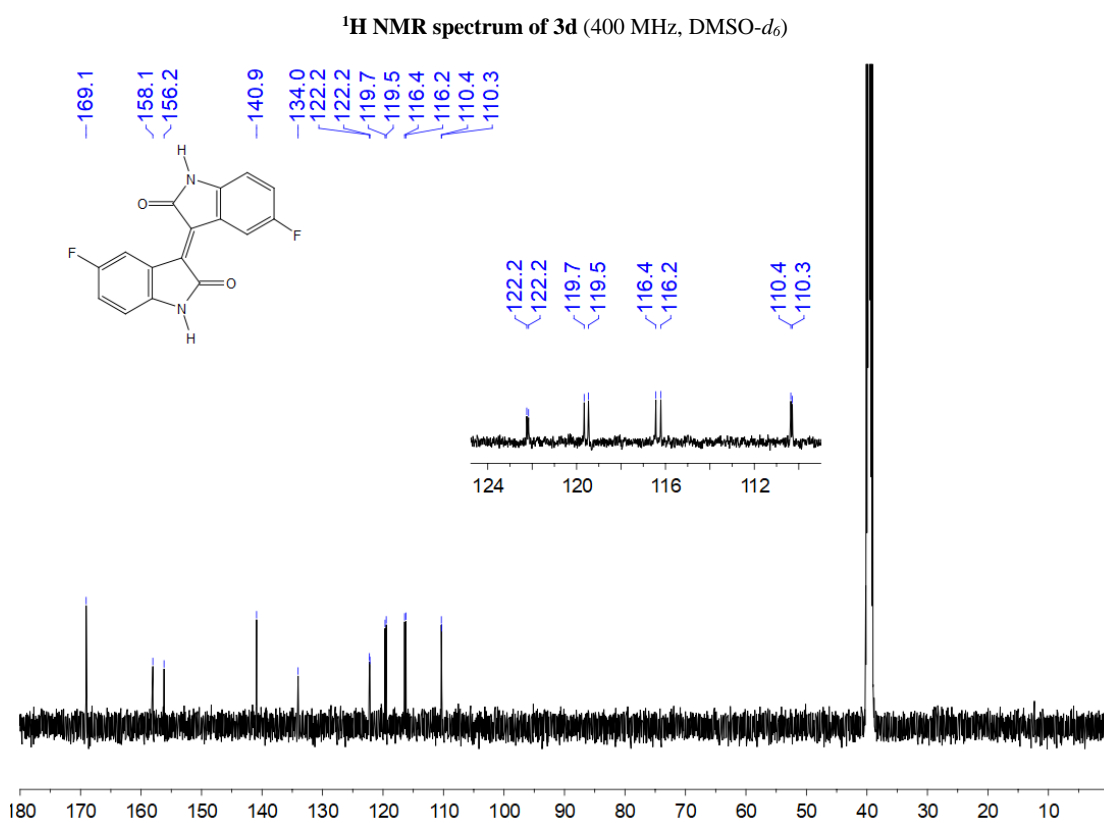

**<sup>13</sup>C NMR spectrum of 3d (126 MHz, DMSO-*d*<sub>6</sub>)**

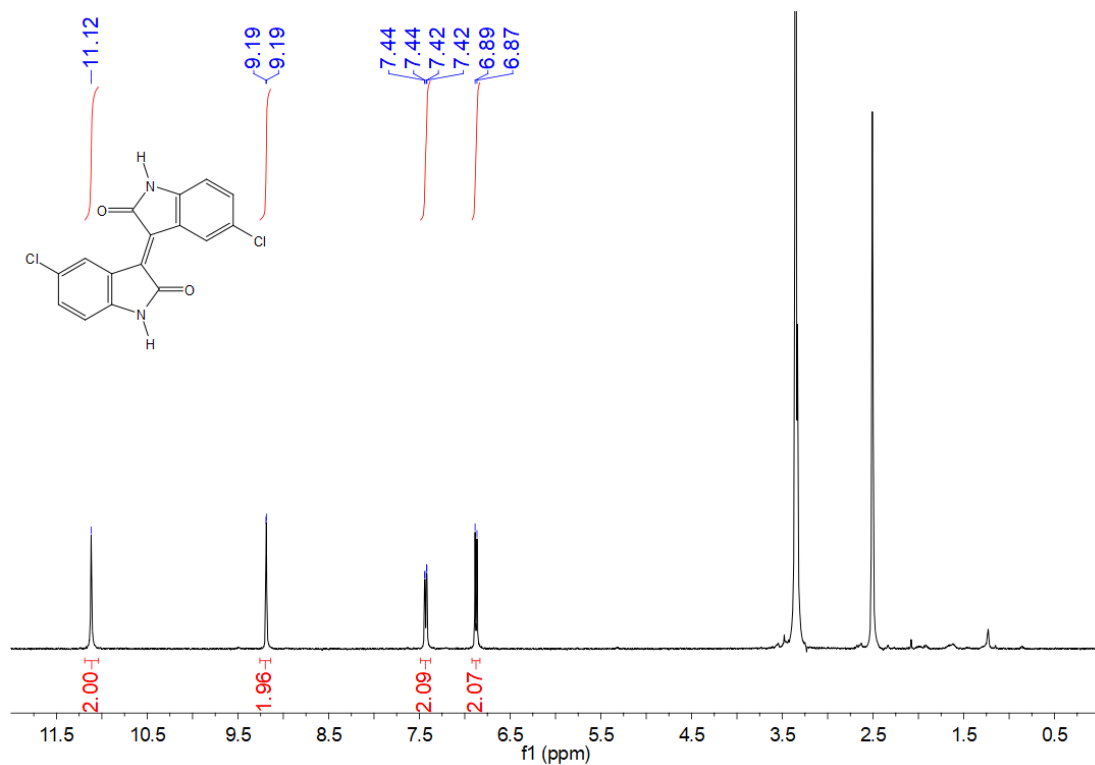

<sup>1</sup>H NMR spectrum of 3e (400 MHz, DMSO-*d*<sub>6</sub>)

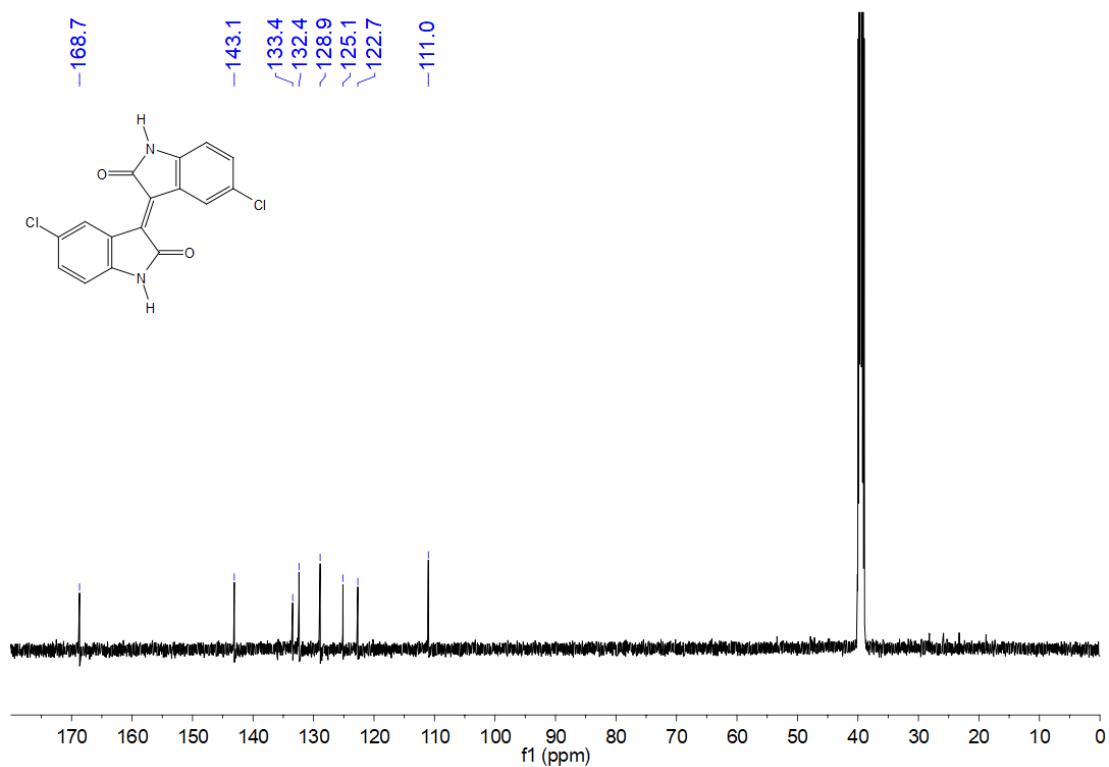

<sup>13</sup>C NMR spectrum of 3e (126 MHz, DMSO-*d*<sub>6</sub>)

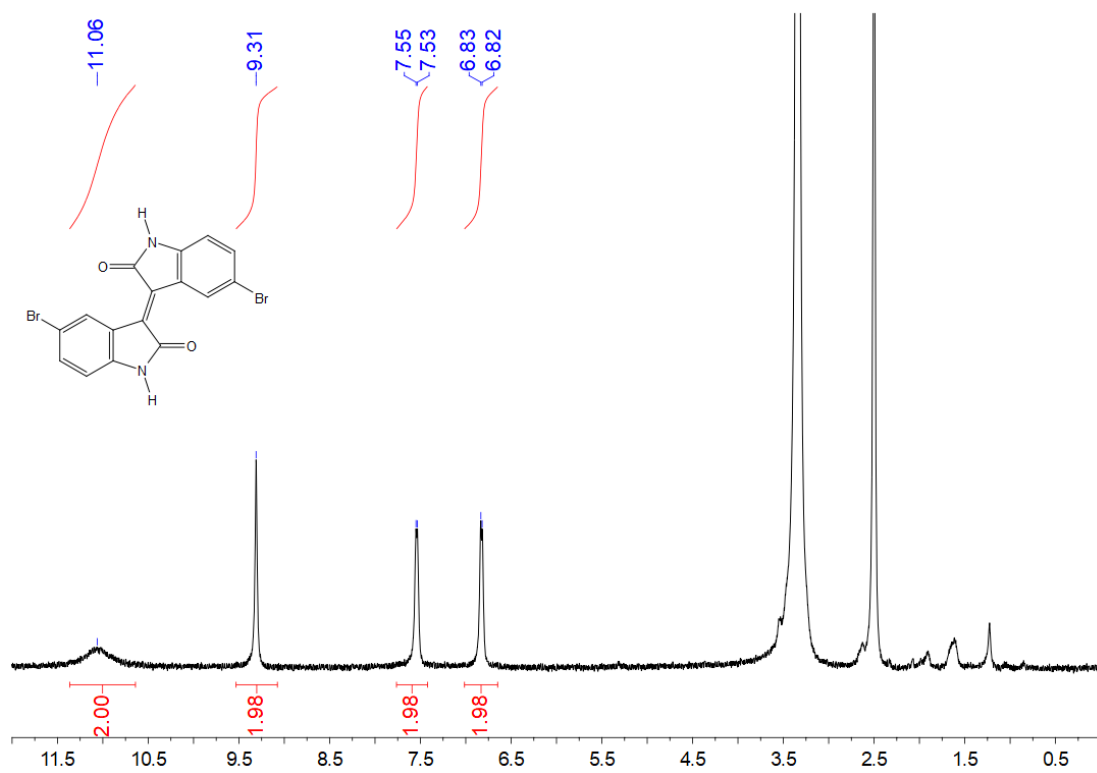

**<sup>1</sup>H NMR spectrum of 3f (400 MHz, DMSO-*d*<sub>6</sub>)**

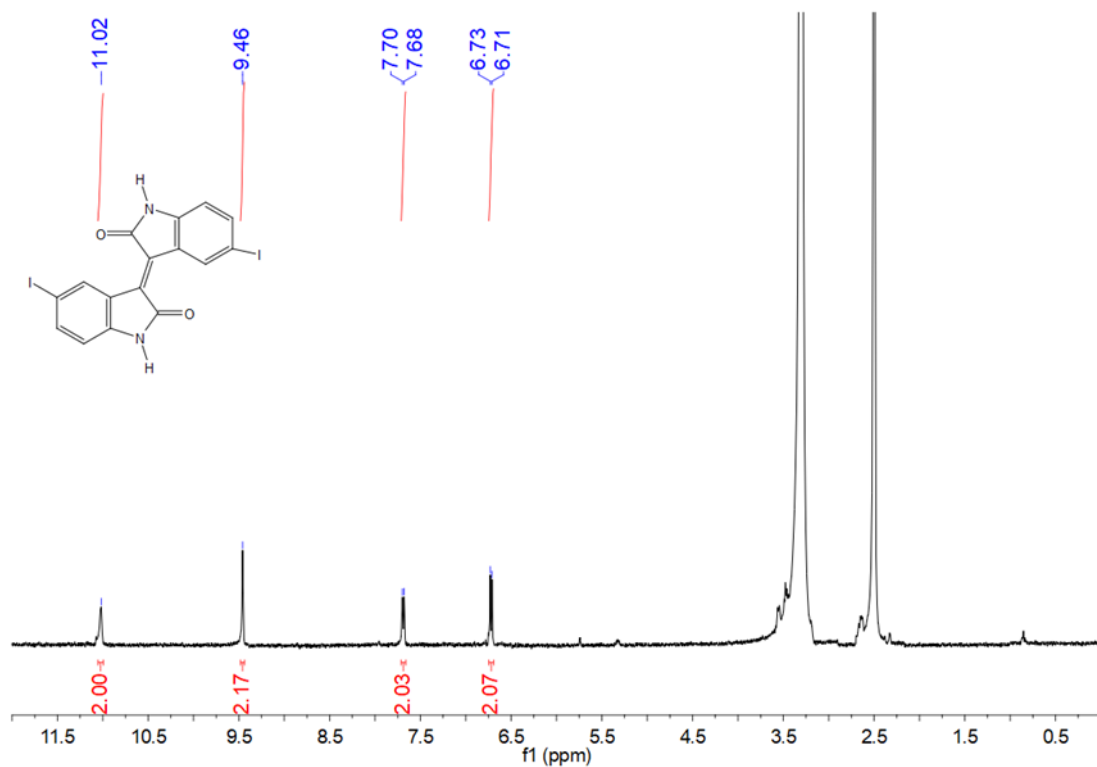

**<sup>1</sup>H NMR spectrum of 3g (400 MHz, DMSO-*d*<sub>6</sub>)**

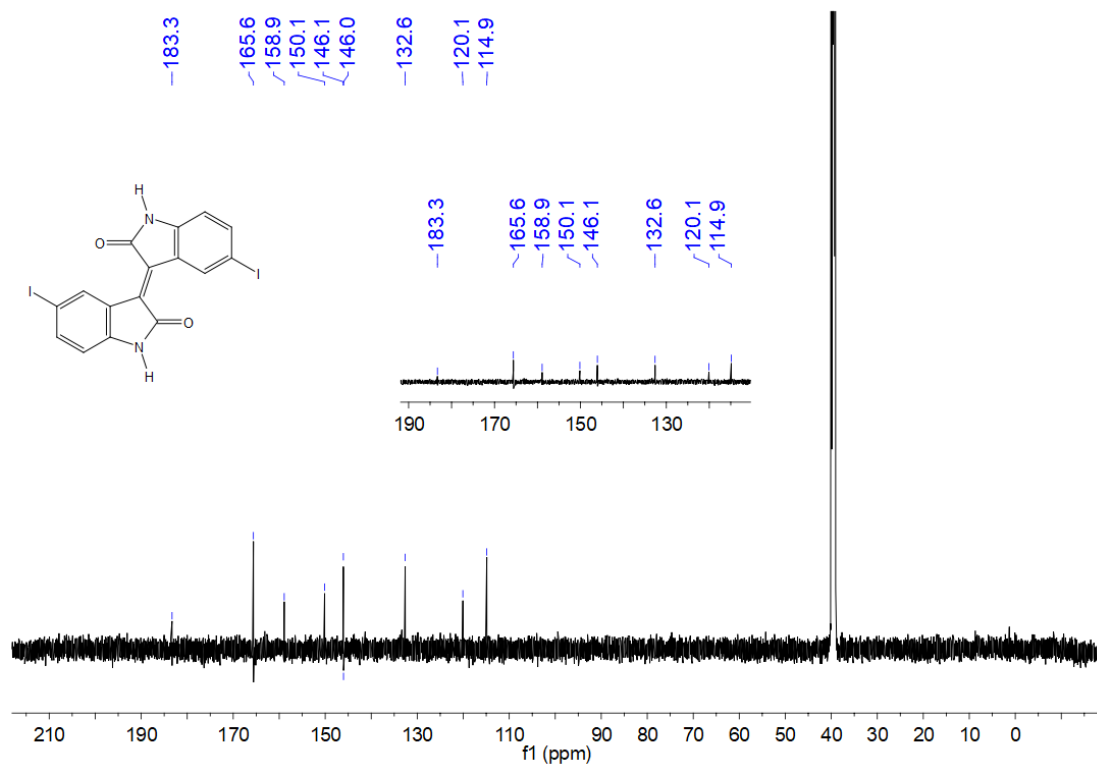

<sup>13</sup>C NMR spectrum of 3g (151 MHz, DMSO-*d*<sub>6</sub>)

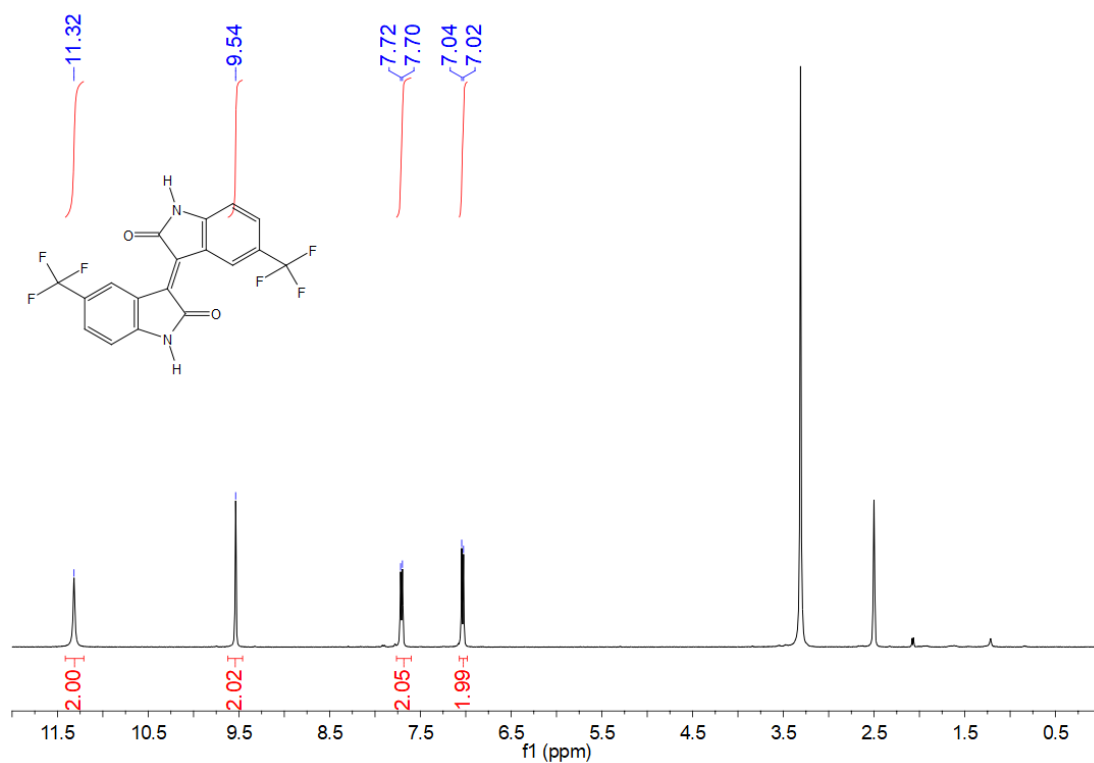

<sup>1</sup>H NMR spectrum of 3h (400 MHz, DMSO-*d*<sub>6</sub>)

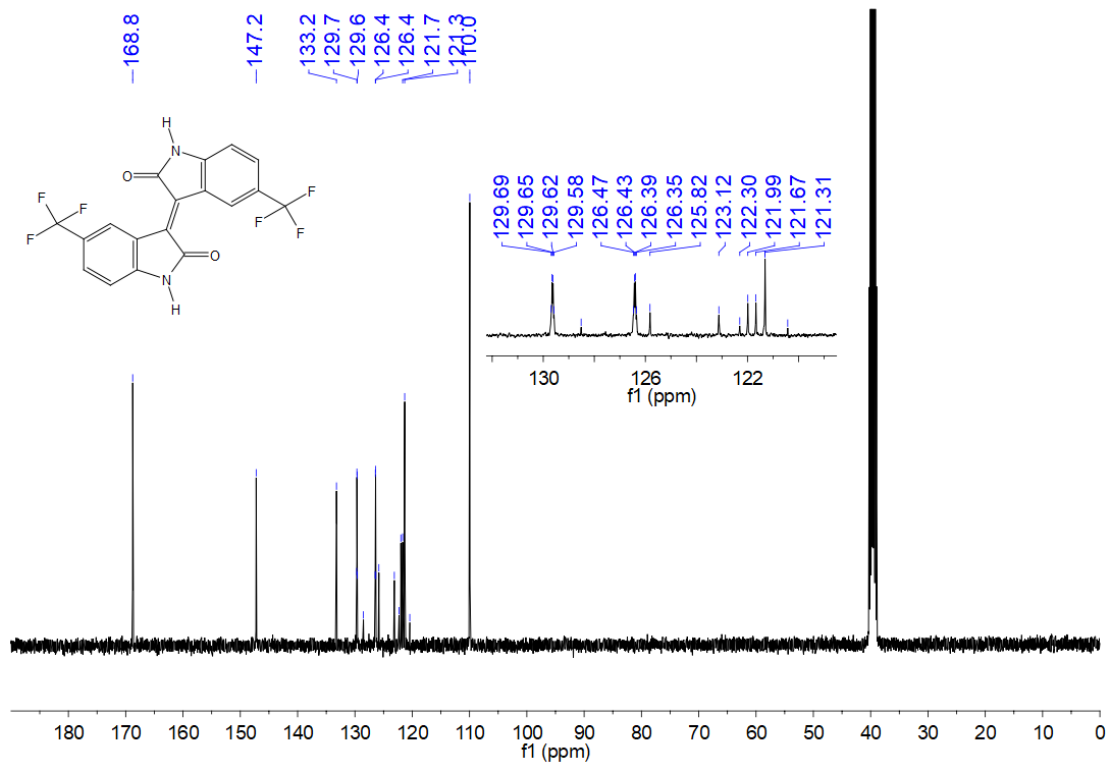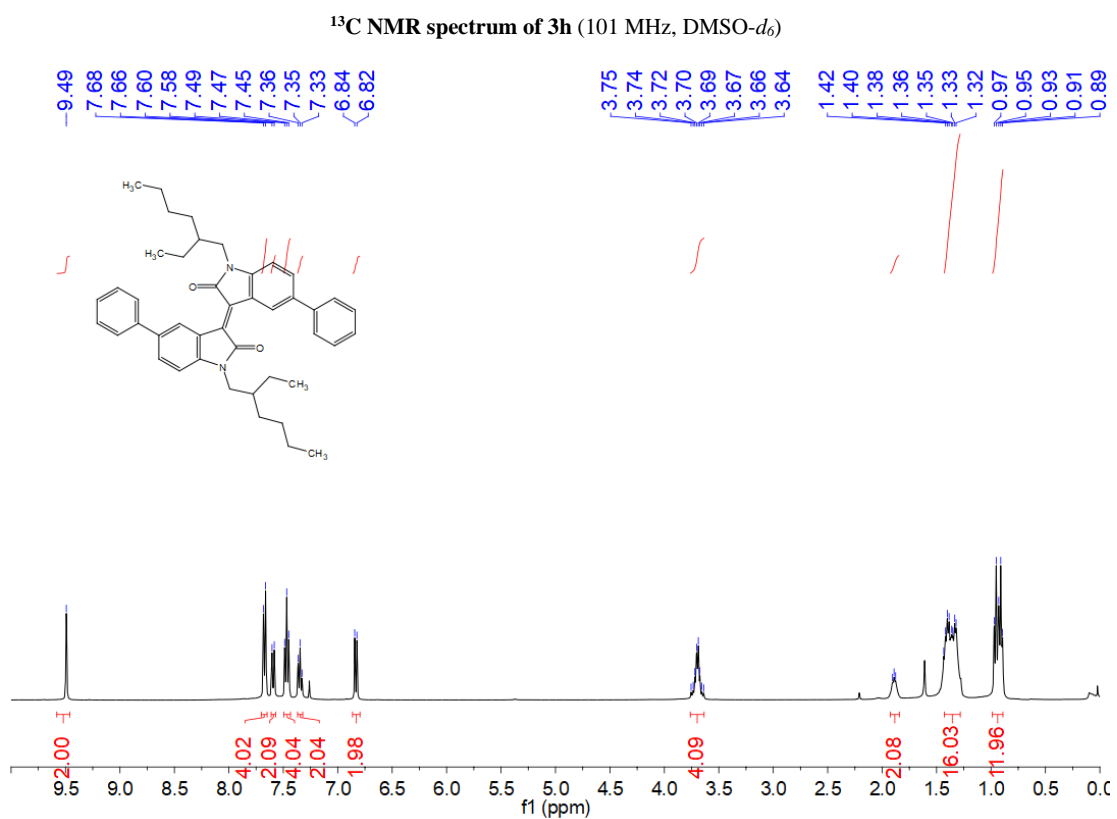

**<sup>1</sup>H NMR spectrum of 3i (400 MHz, CDCl<sub>3</sub>)**



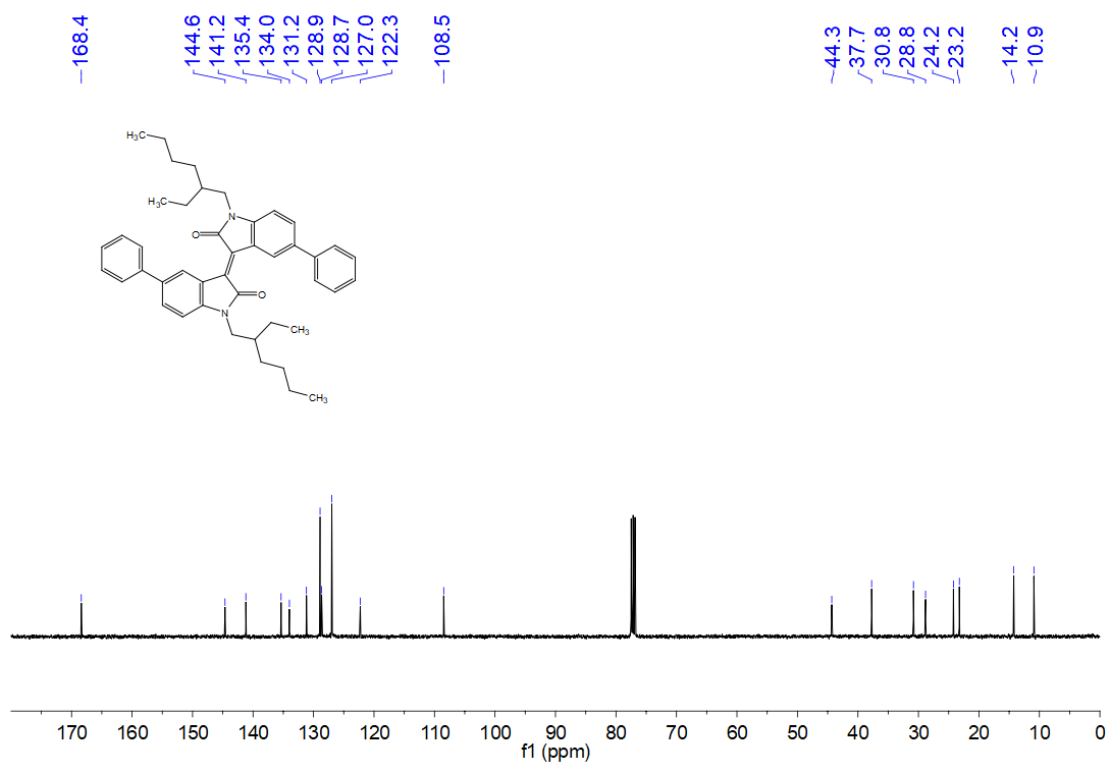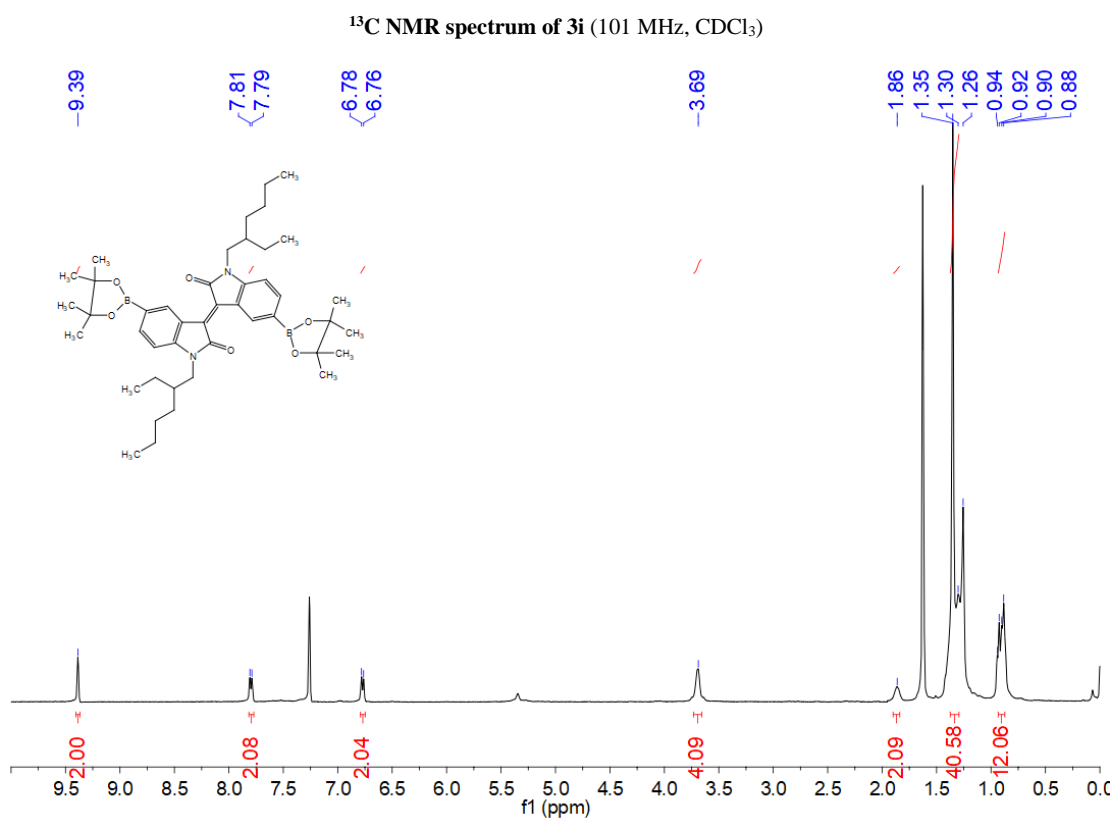

**<sup>1</sup>H NMR spectrum of 3j (400 MHz, CDCl<sub>3</sub>)**

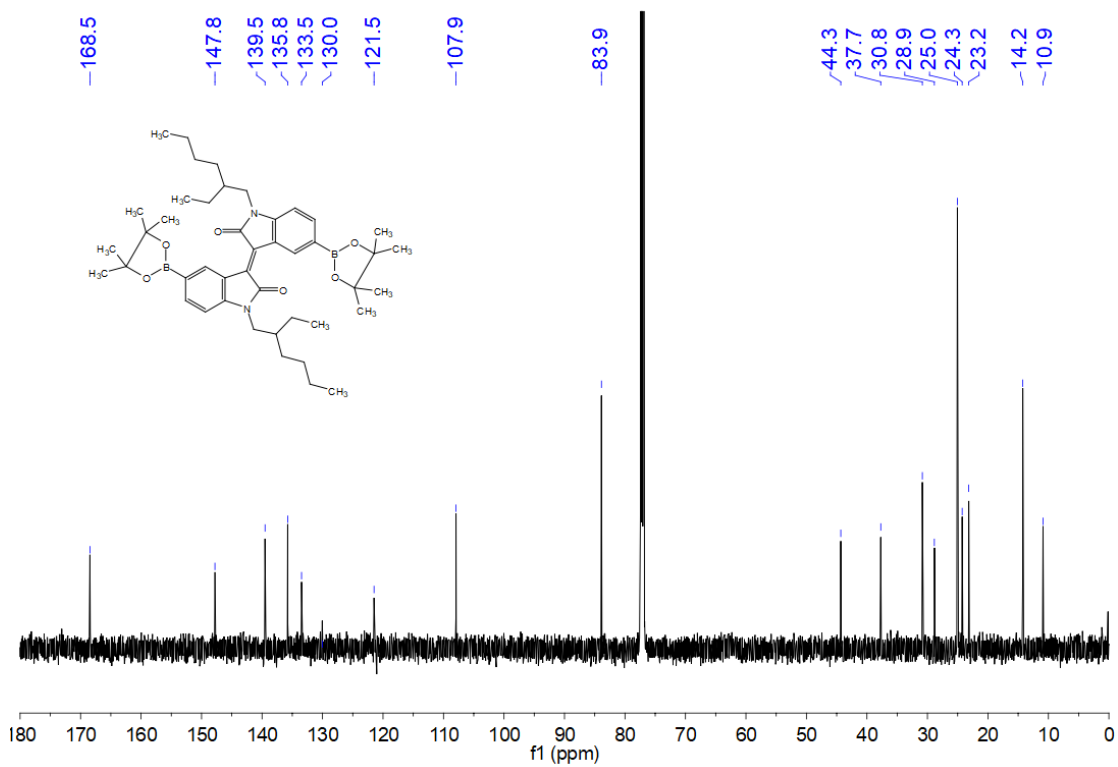

$^{13}\text{C}$  NMR spectrum of 3j (151 MHz,  $\text{CDCl}_3$ )

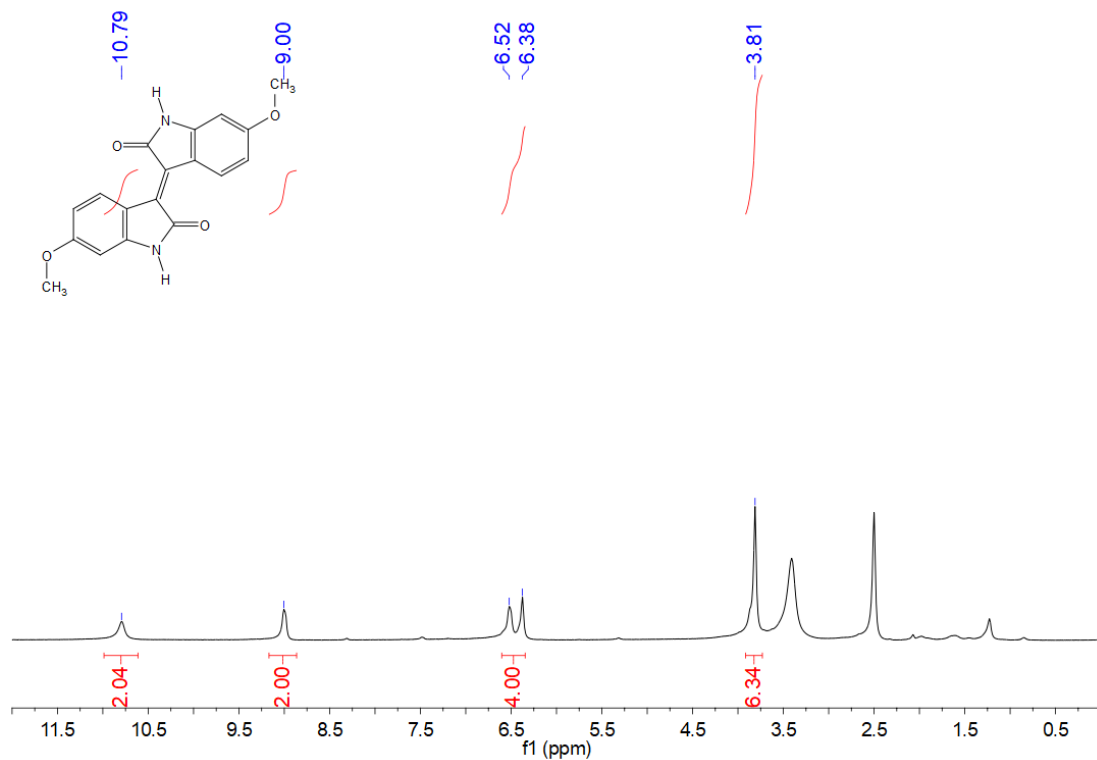

$^1\text{H}$  NMR spectrum of 3k (400 MHz,  $\text{DMSO-}d_6$ )

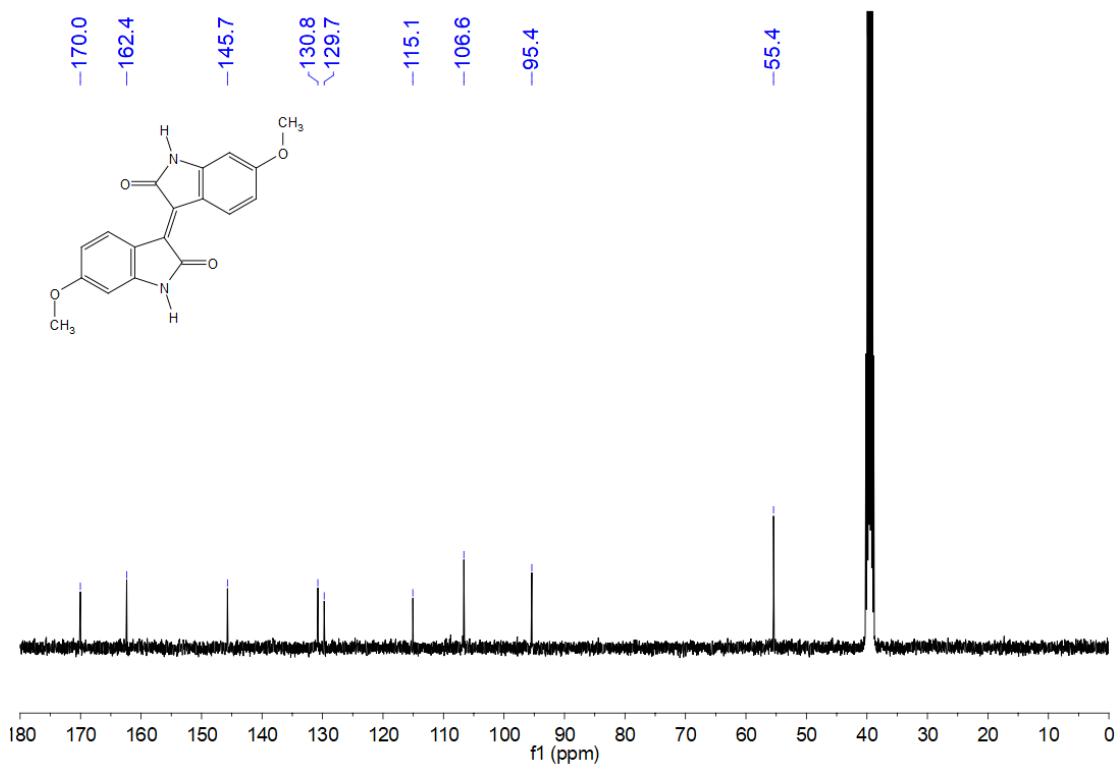

<sup>13</sup>C NMR spectrum of 3k (101 MHz, DMSO-*d*<sub>6</sub>)

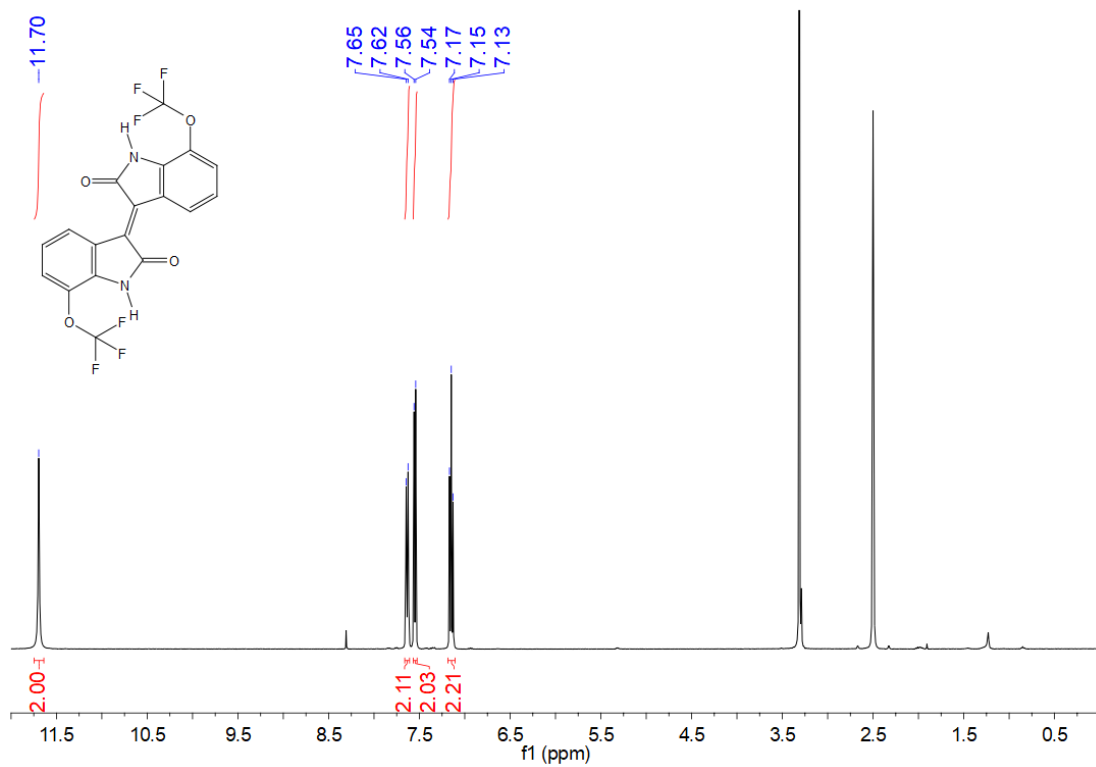

<sup>1</sup>H NMR spectrum of 3l (400 MHz, DMSO-*d*<sub>6</sub>)

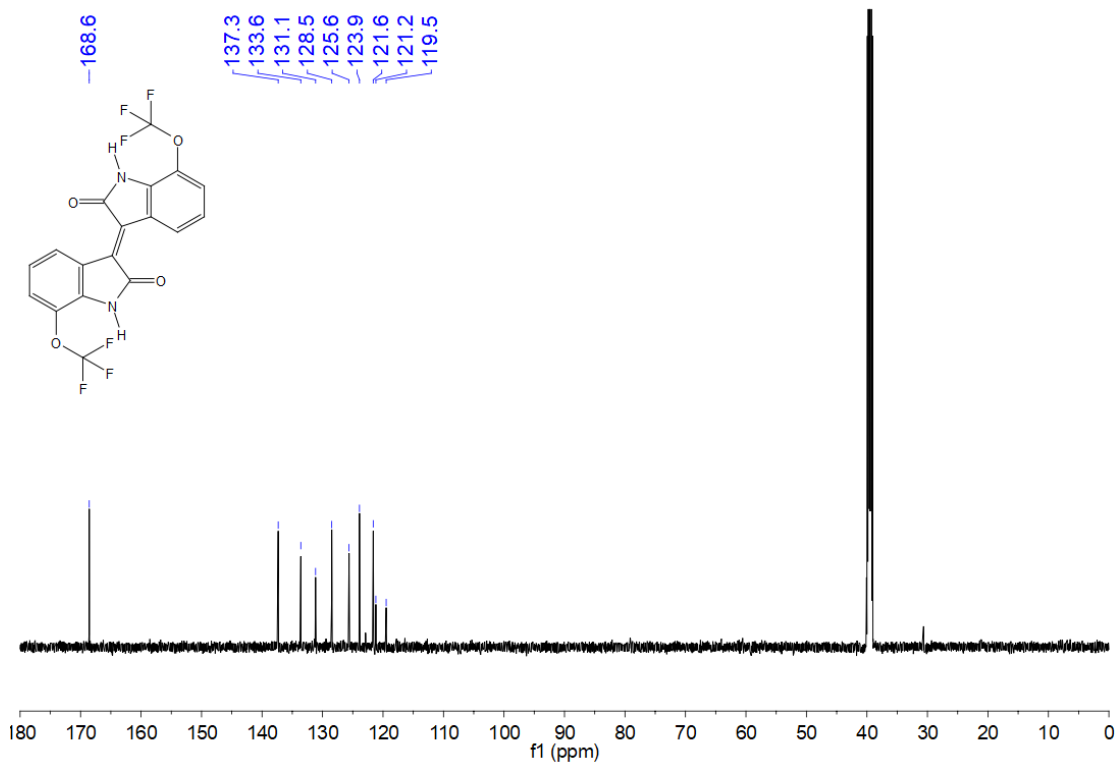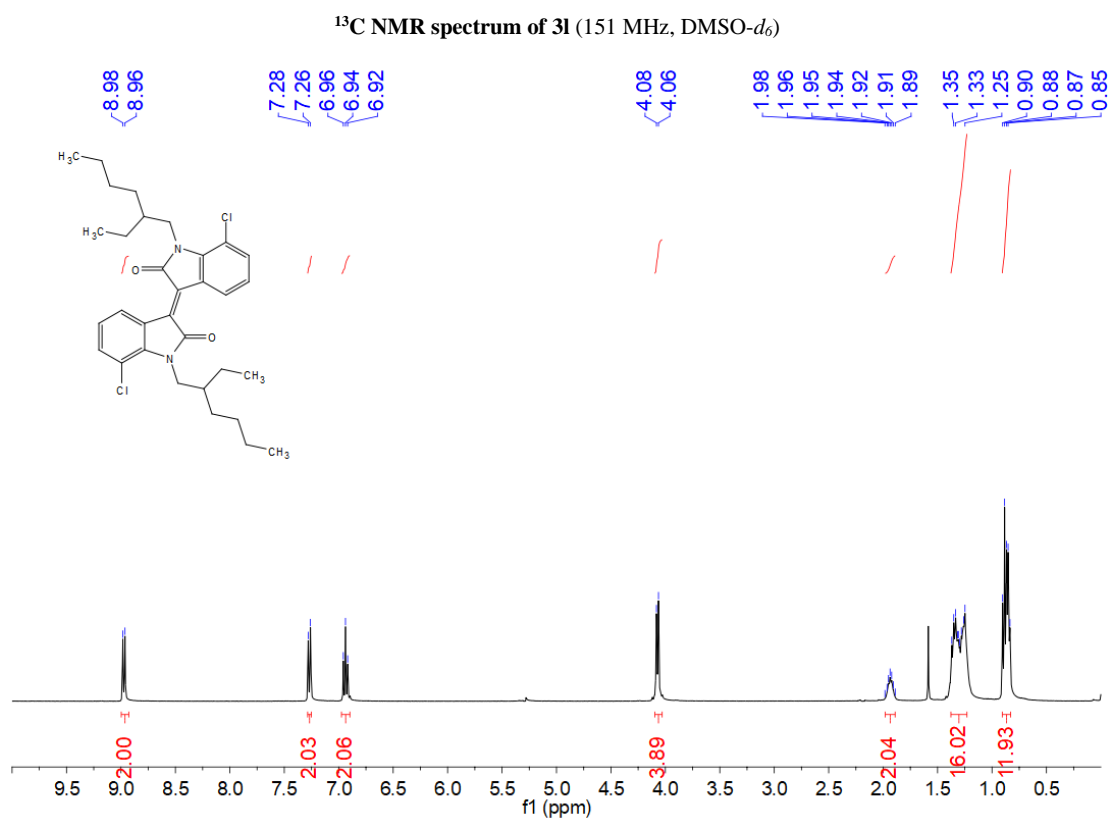

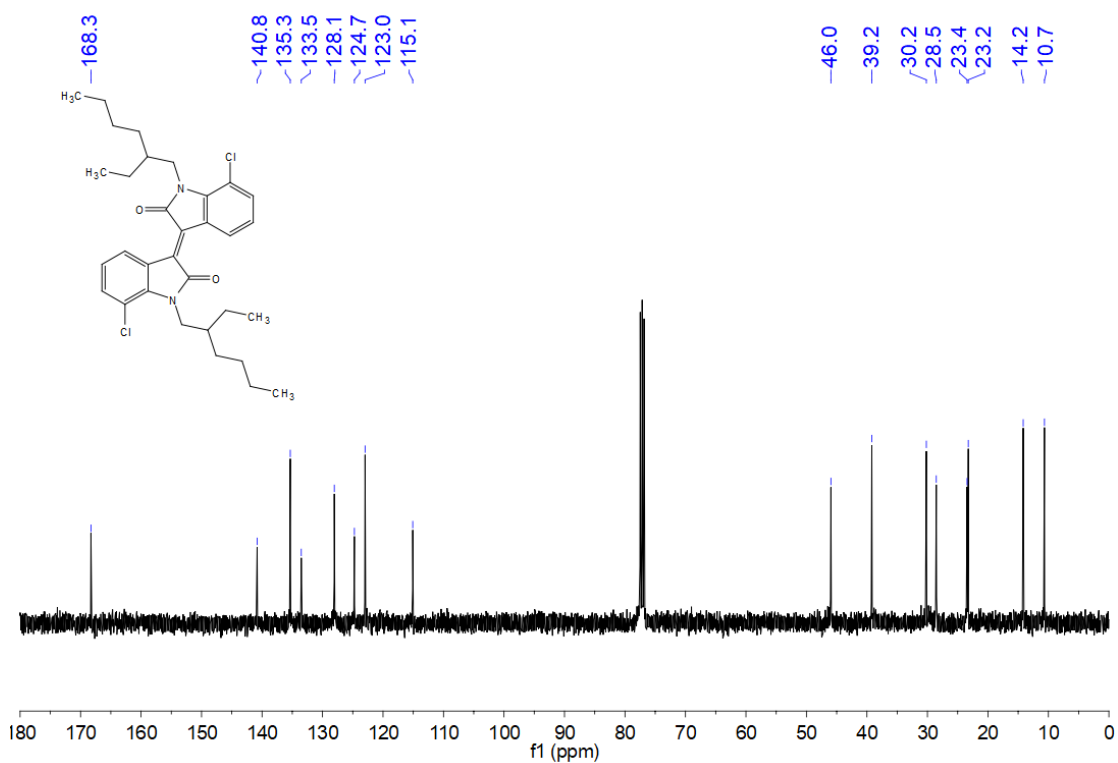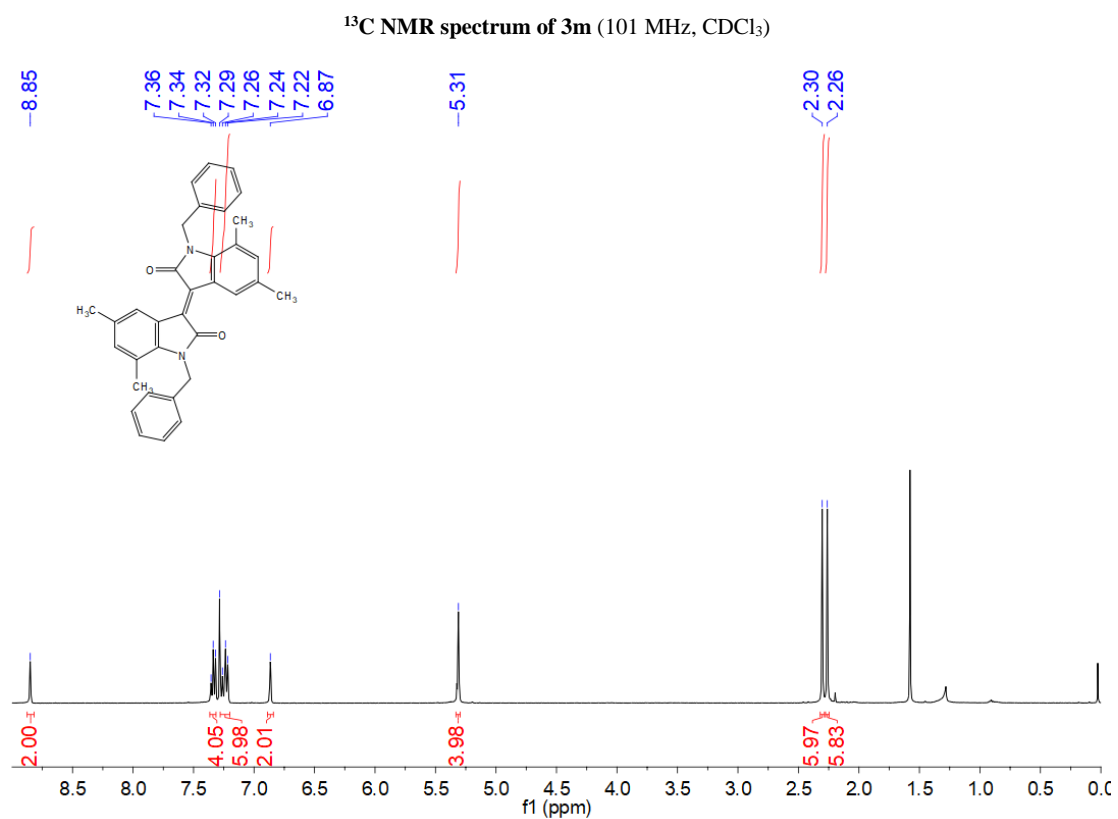

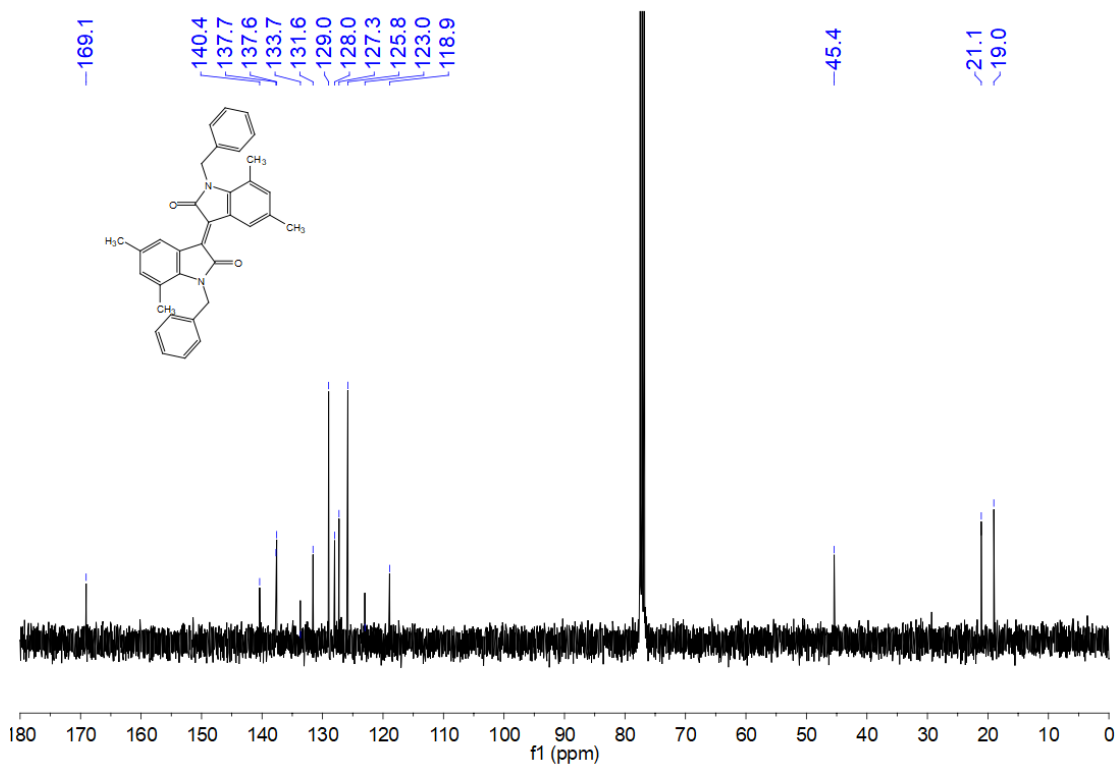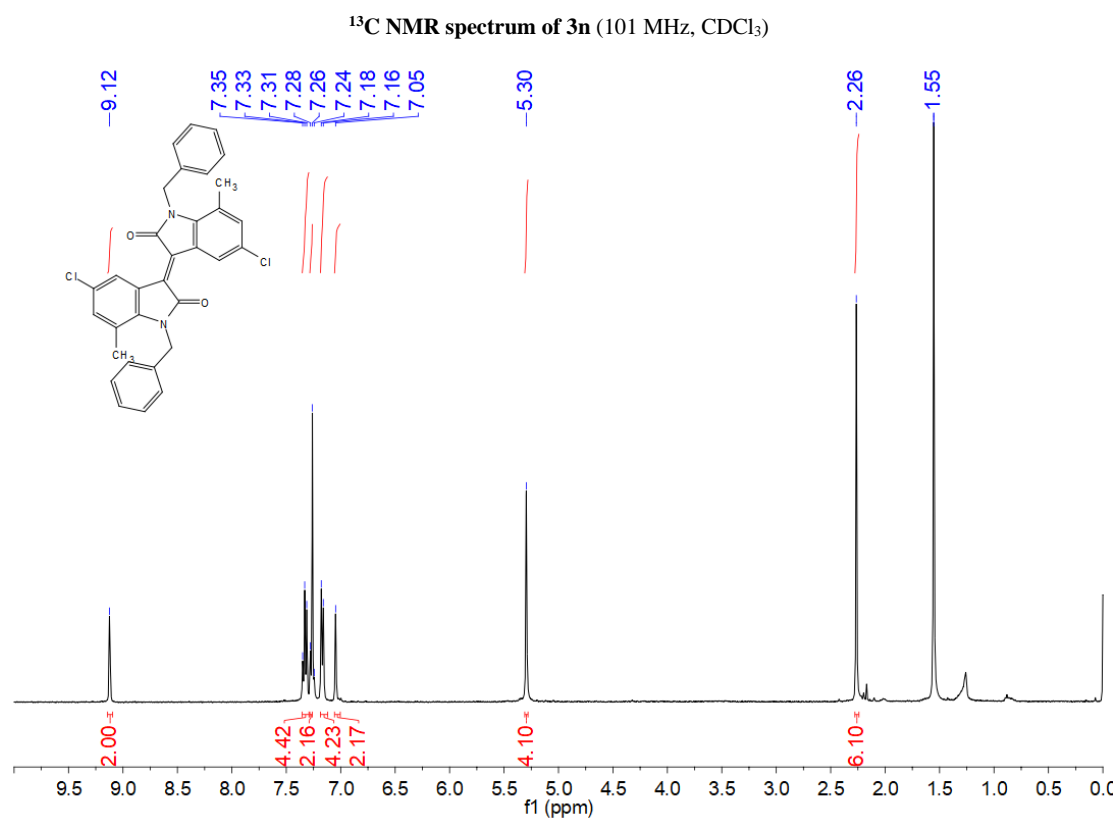

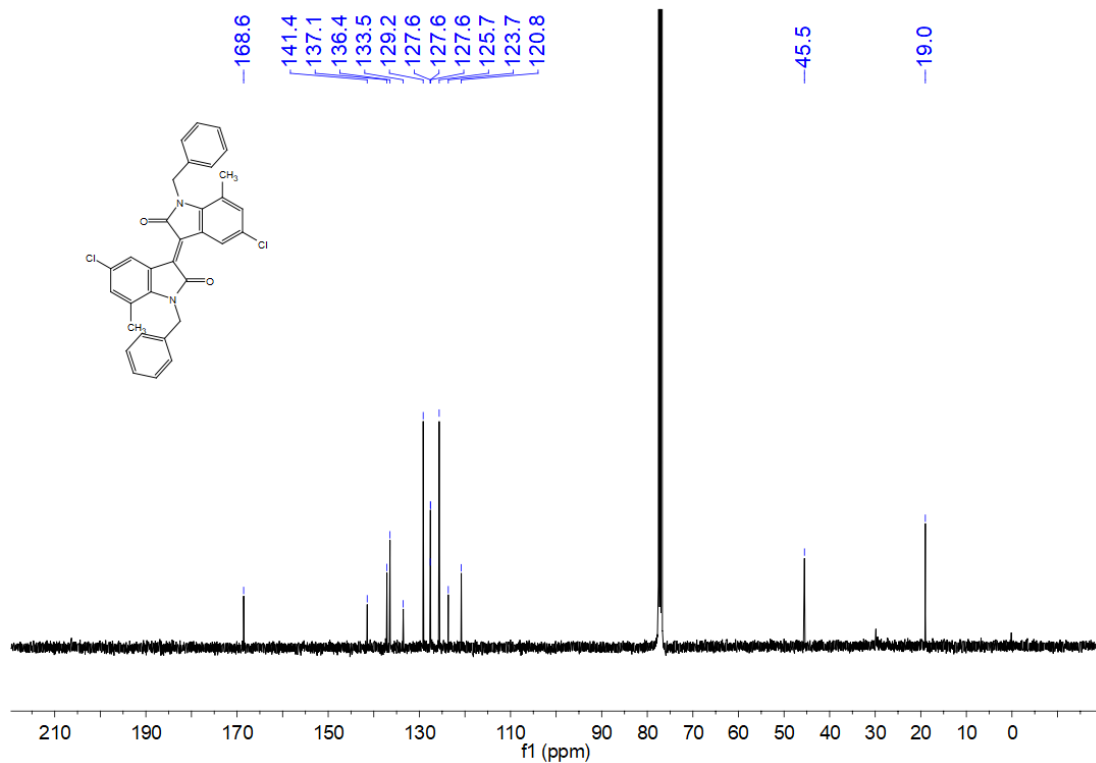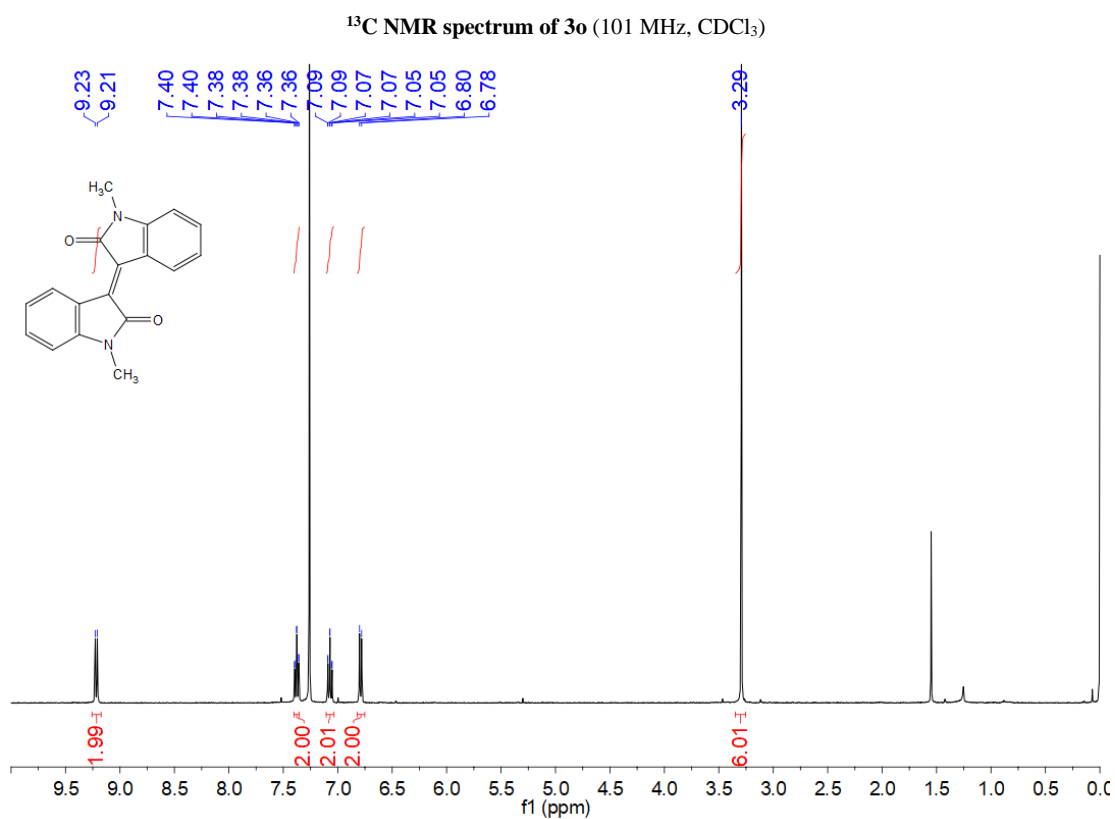

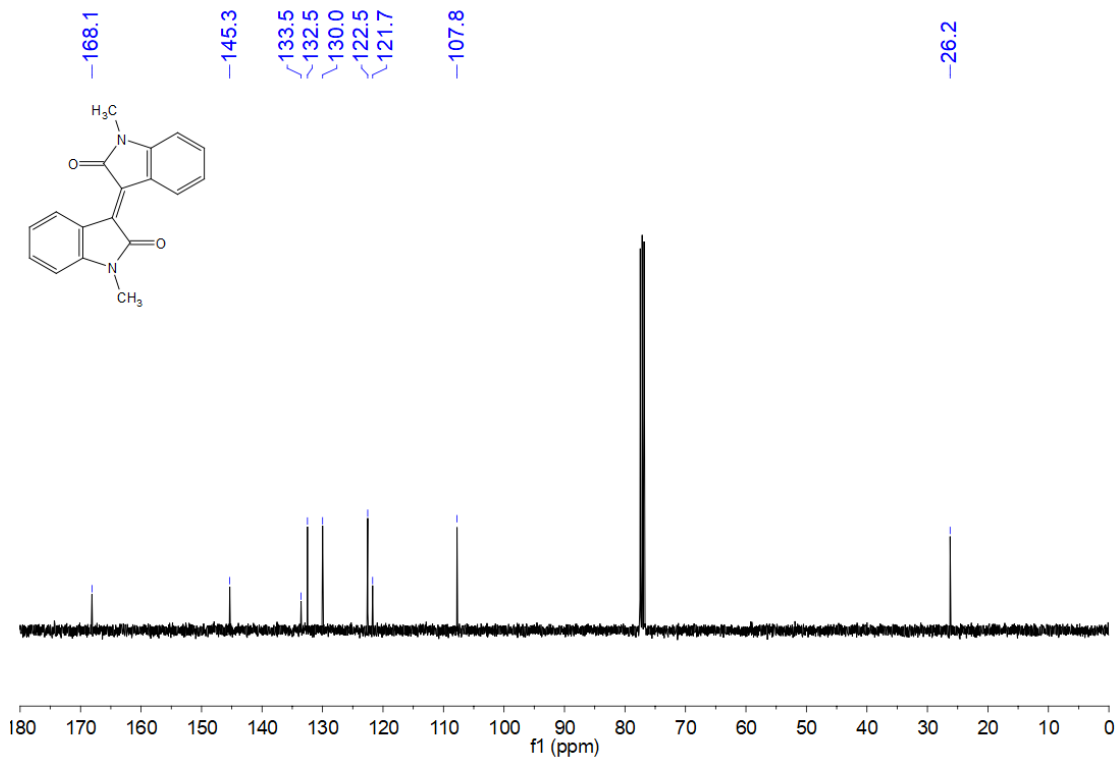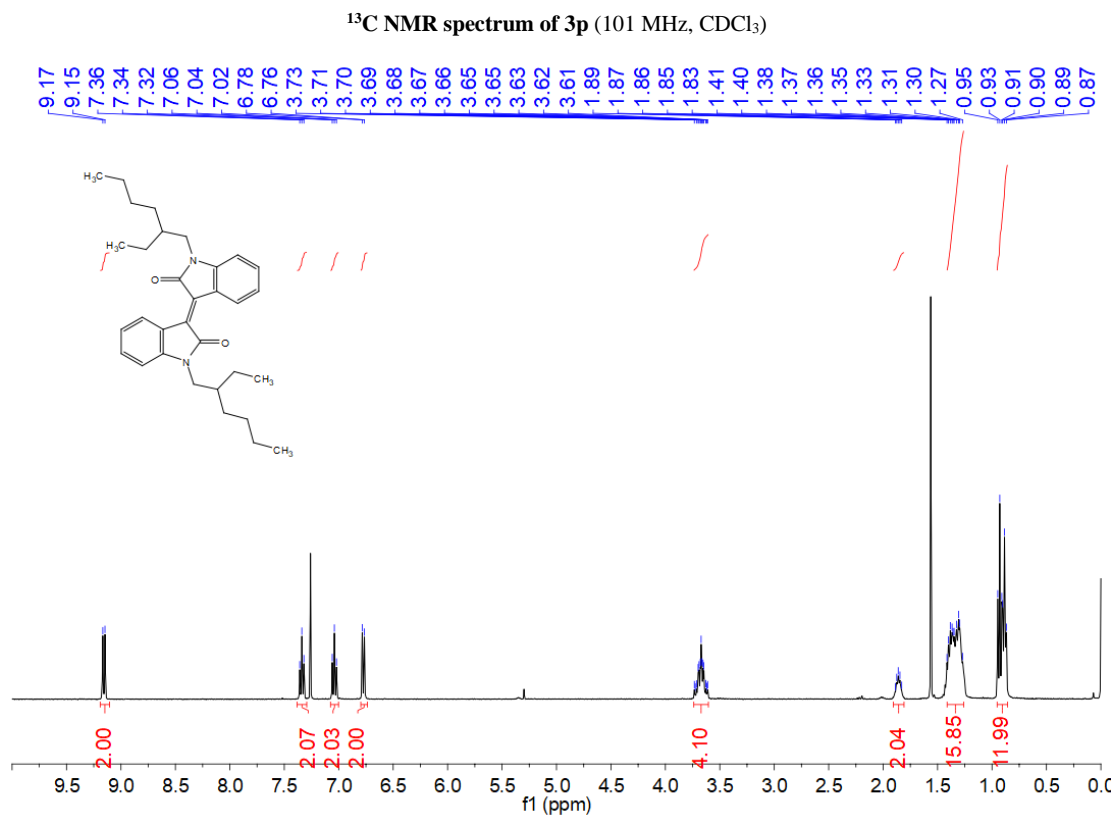



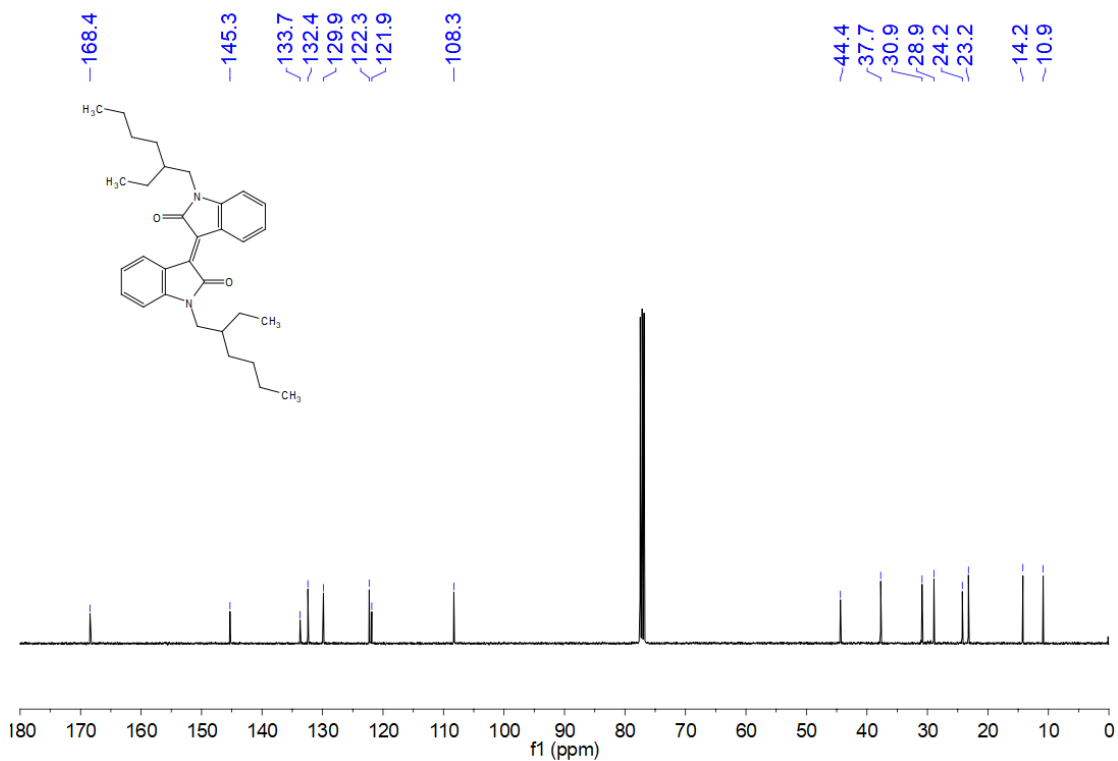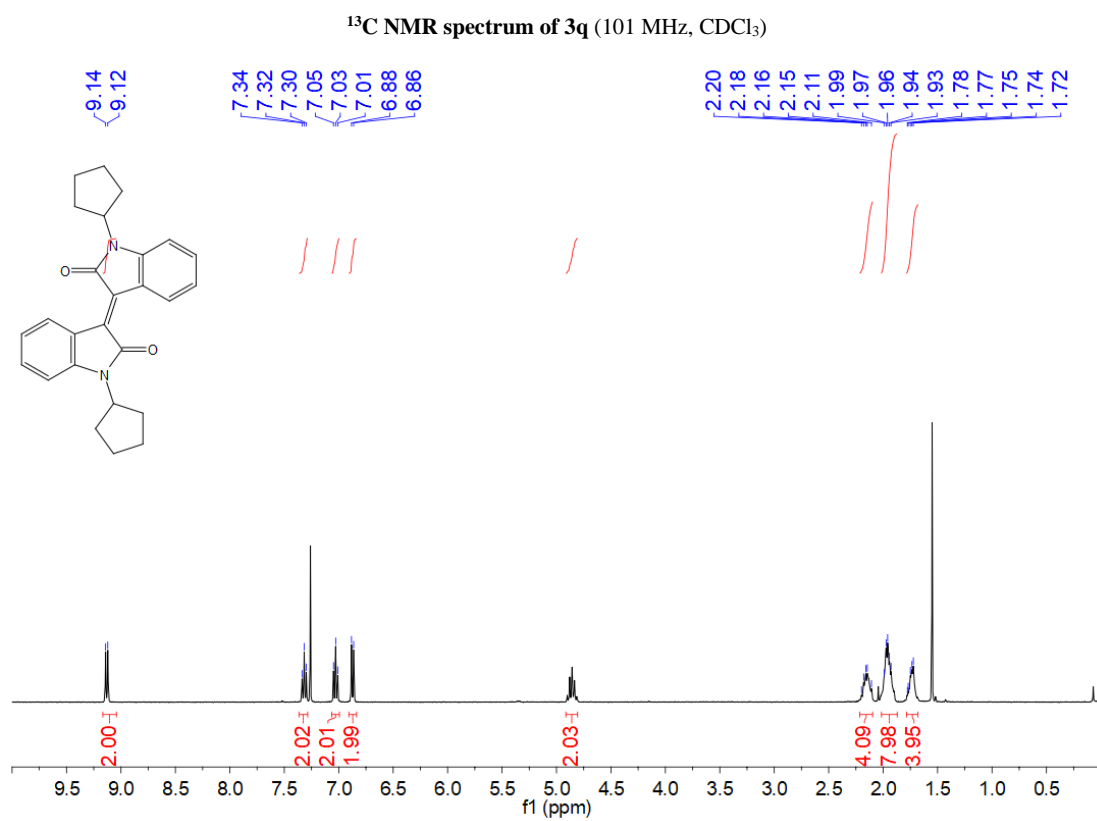

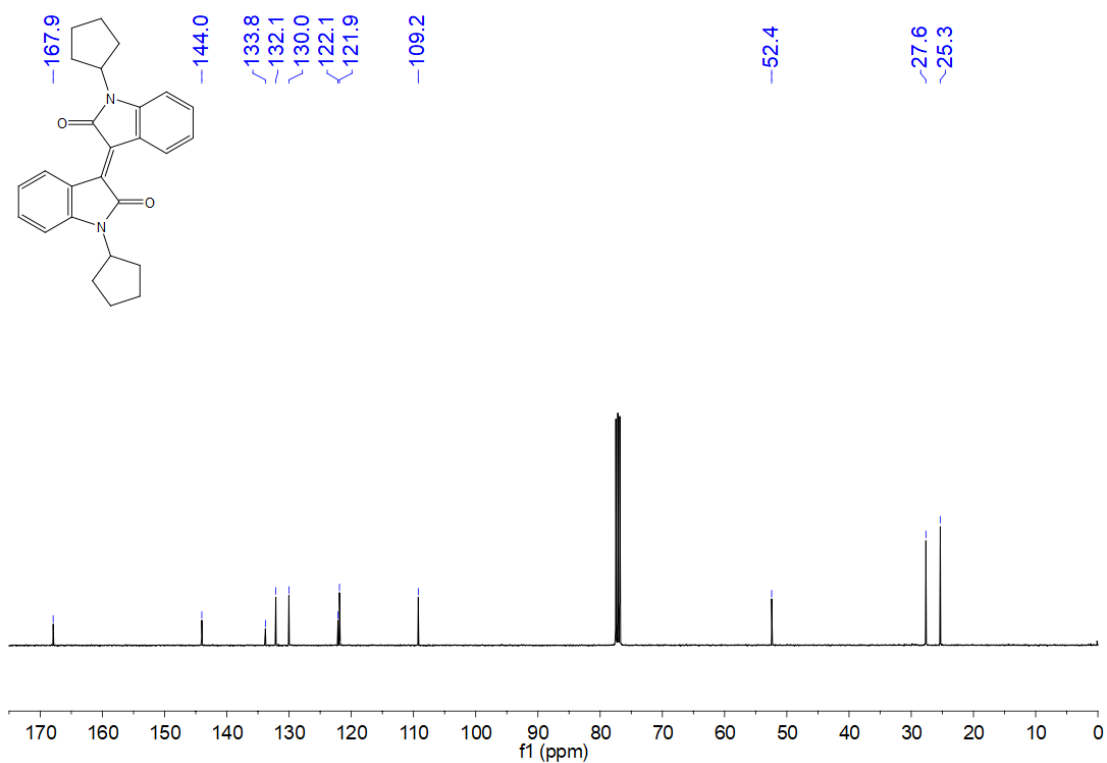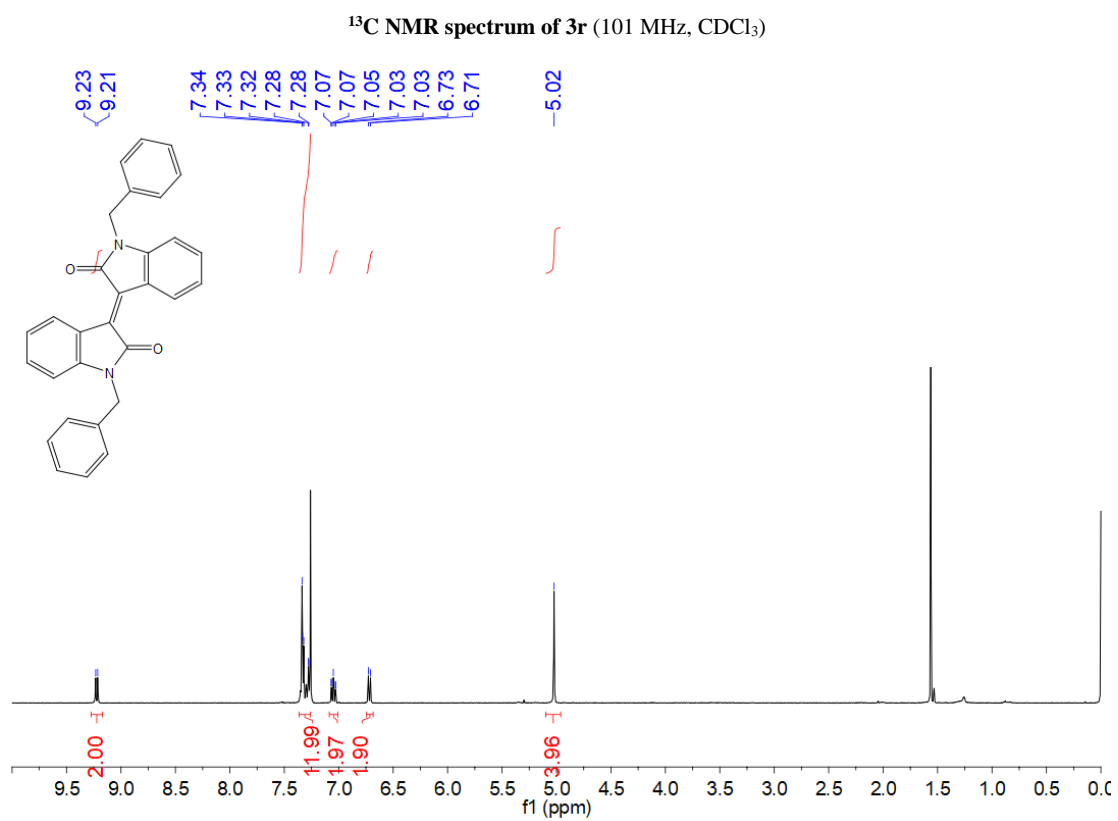

**<sup>1</sup>H NMR spectrum of 3s (400 MHz, CDCl<sub>3</sub>)**

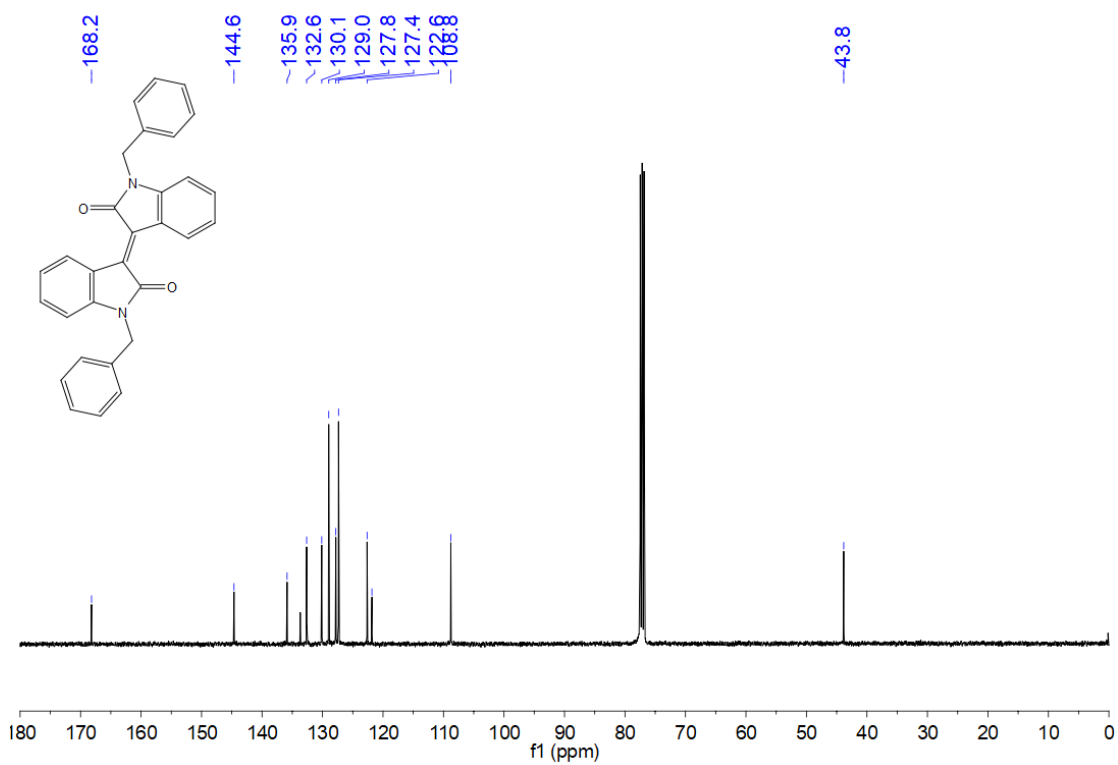

<sup>13</sup>C NMR spectrum of 3s (101 MHz, CDCl<sub>3</sub>)

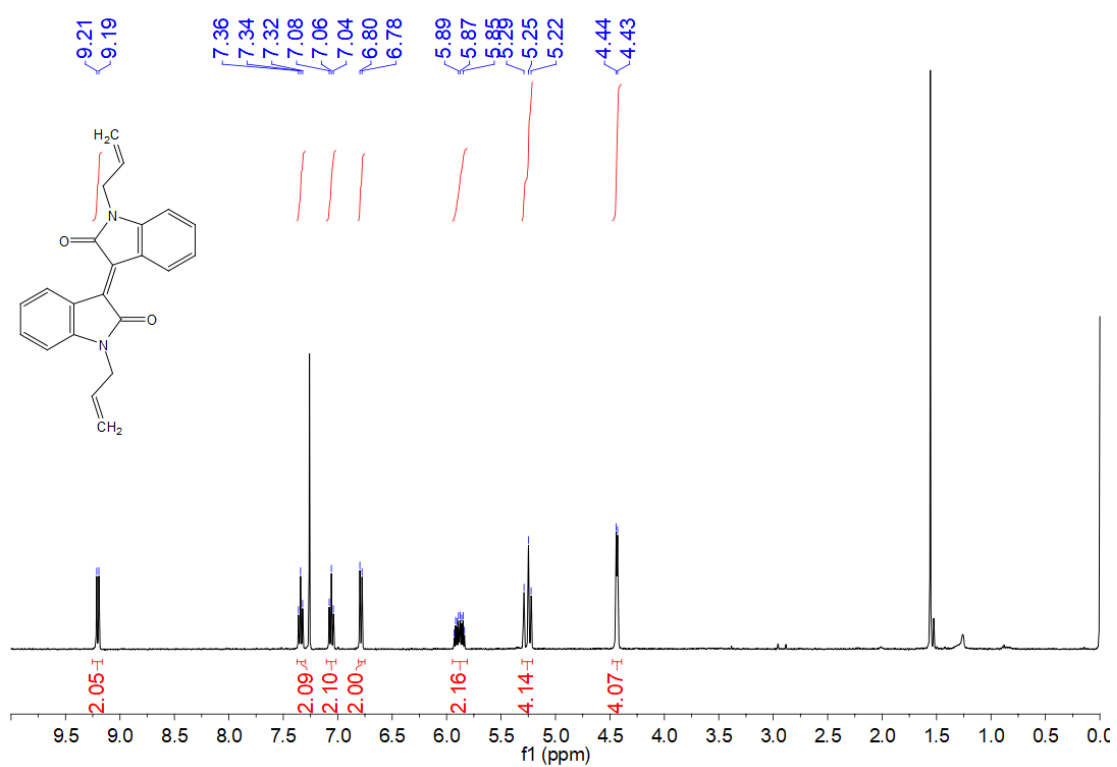

<sup>1</sup>H NMR spectrum of 3t (400 MHz, CDCl<sub>3</sub>)

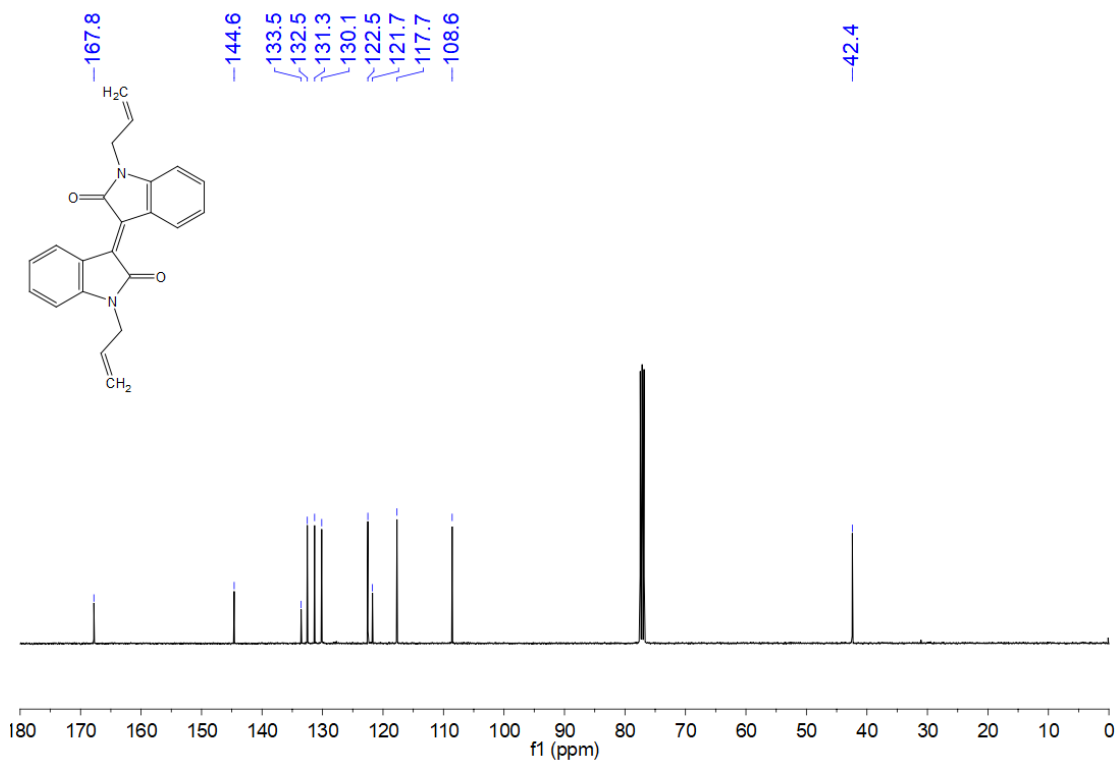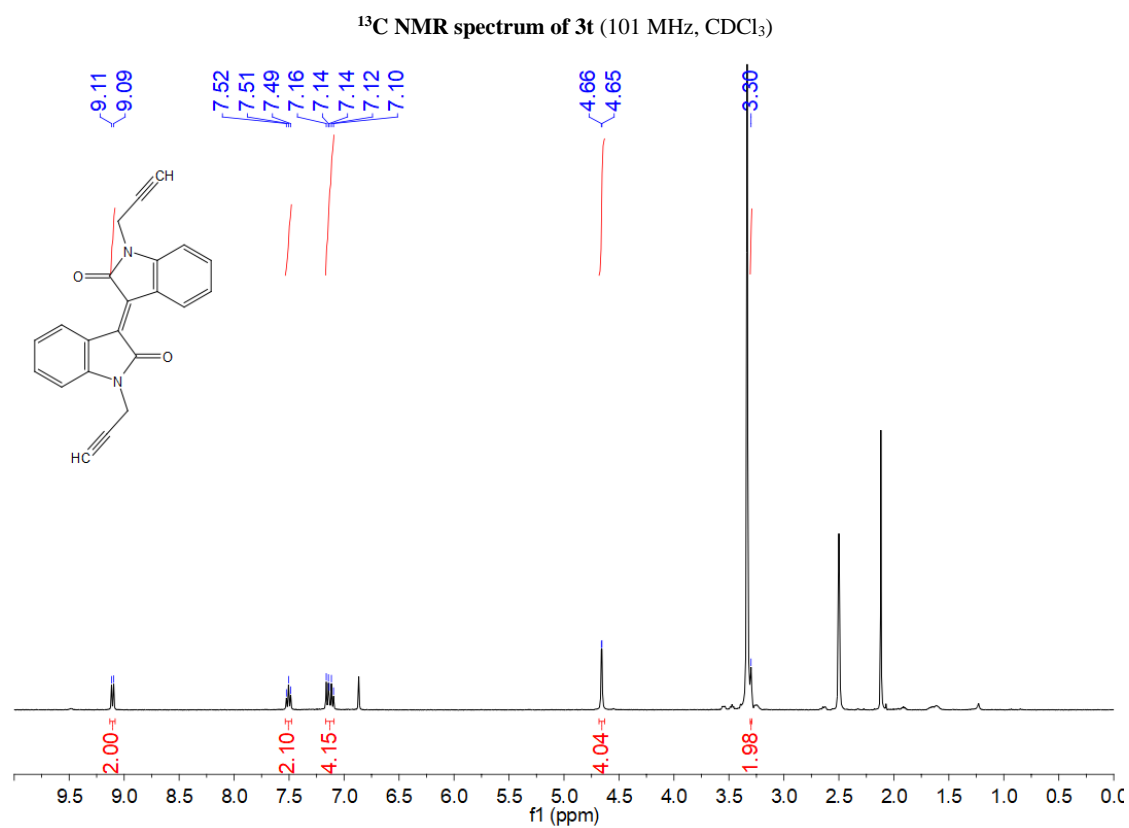

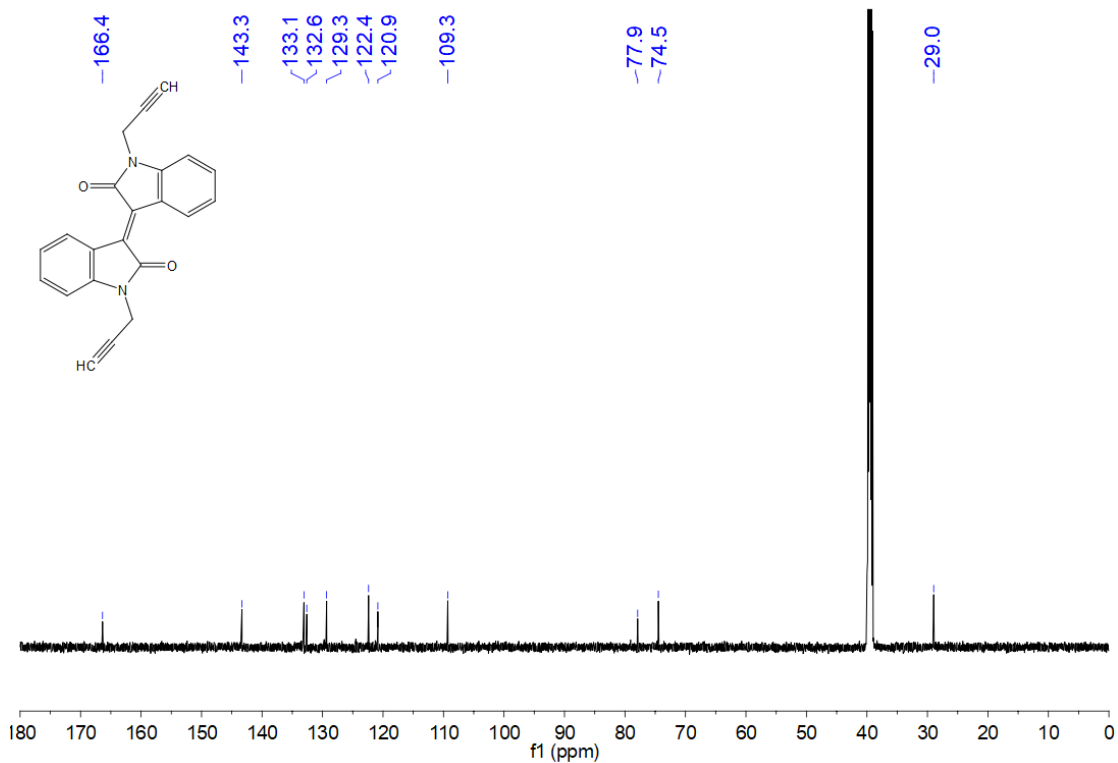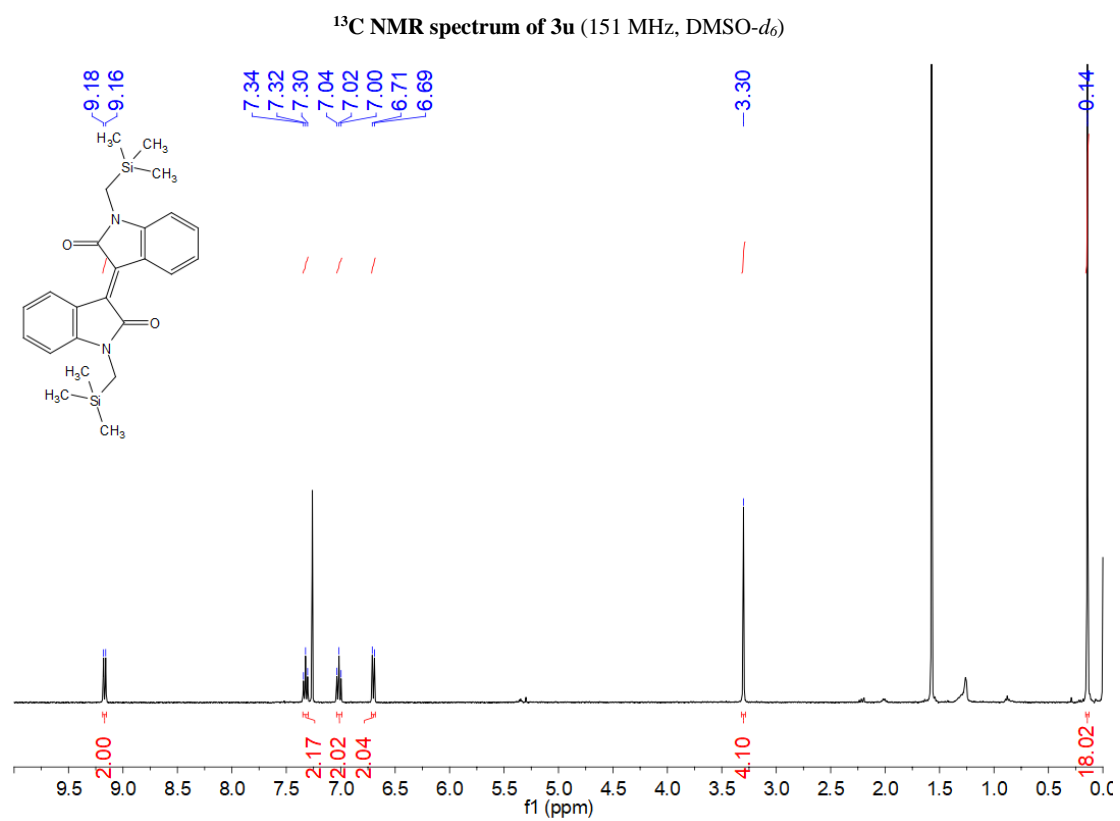

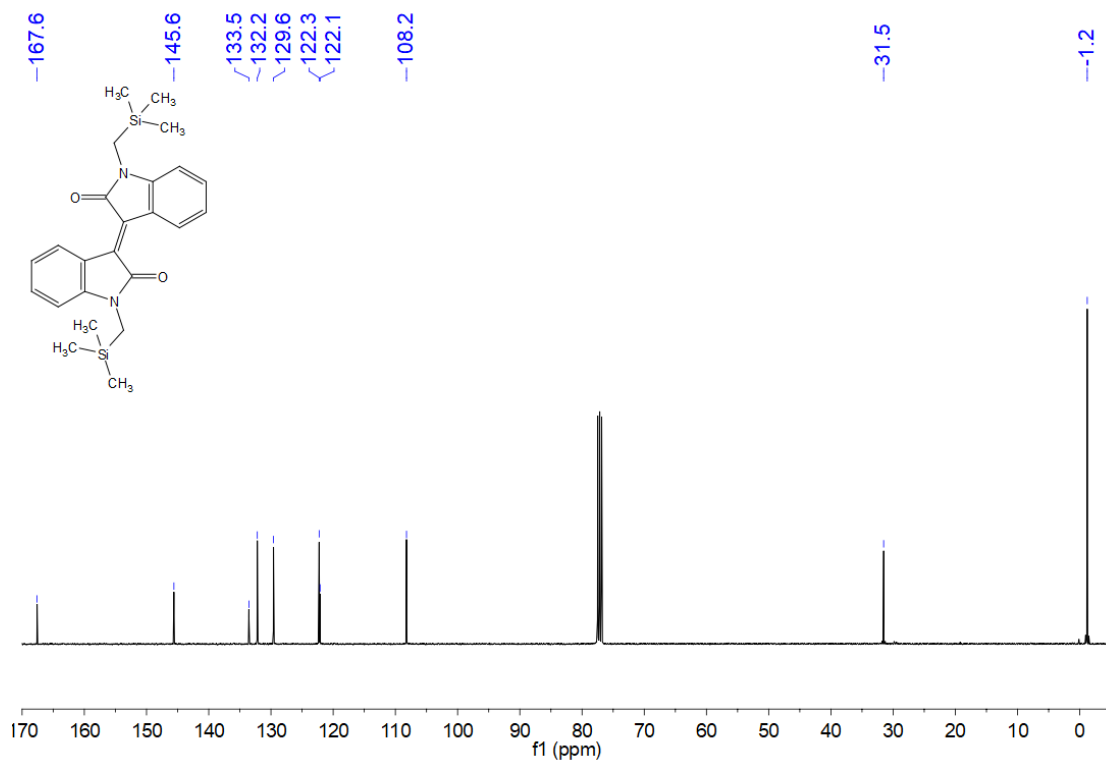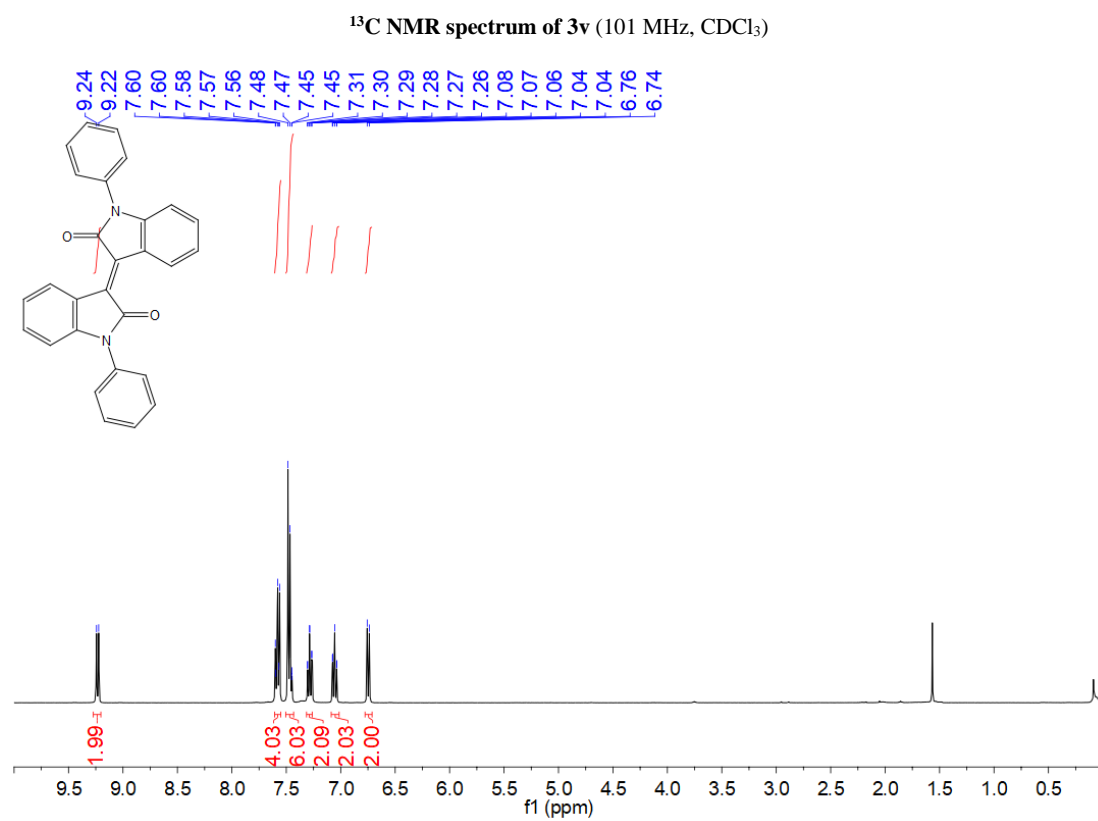

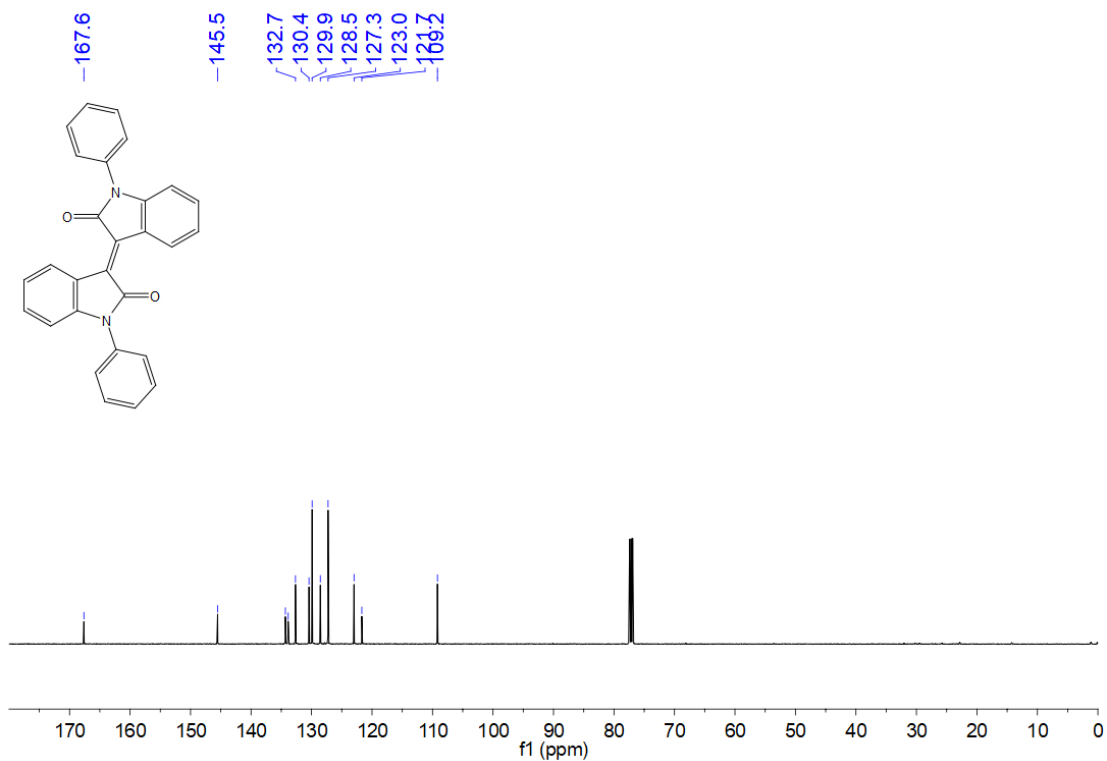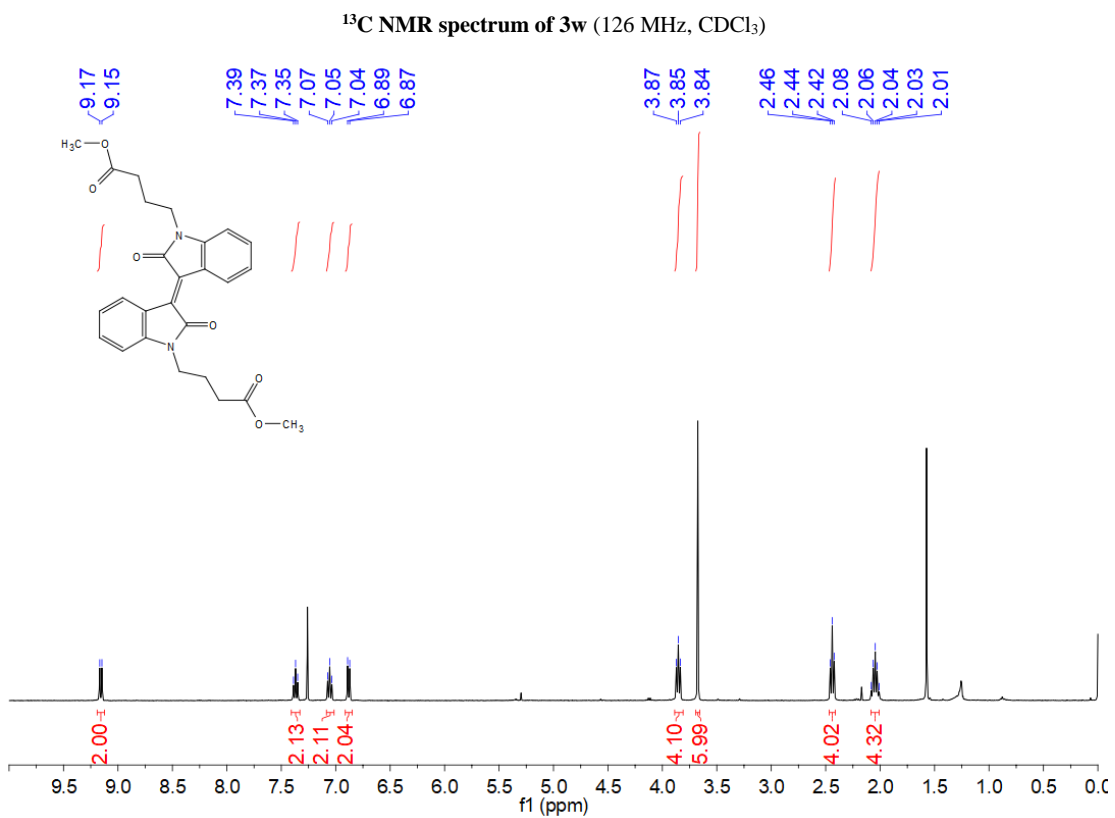

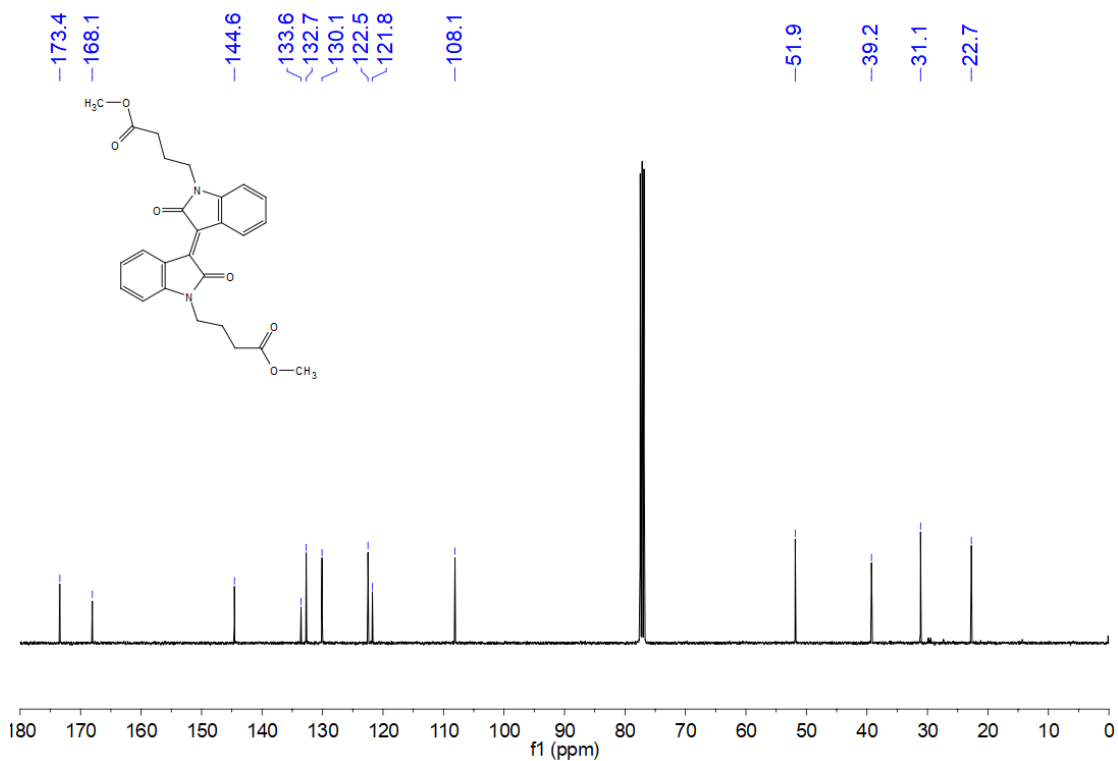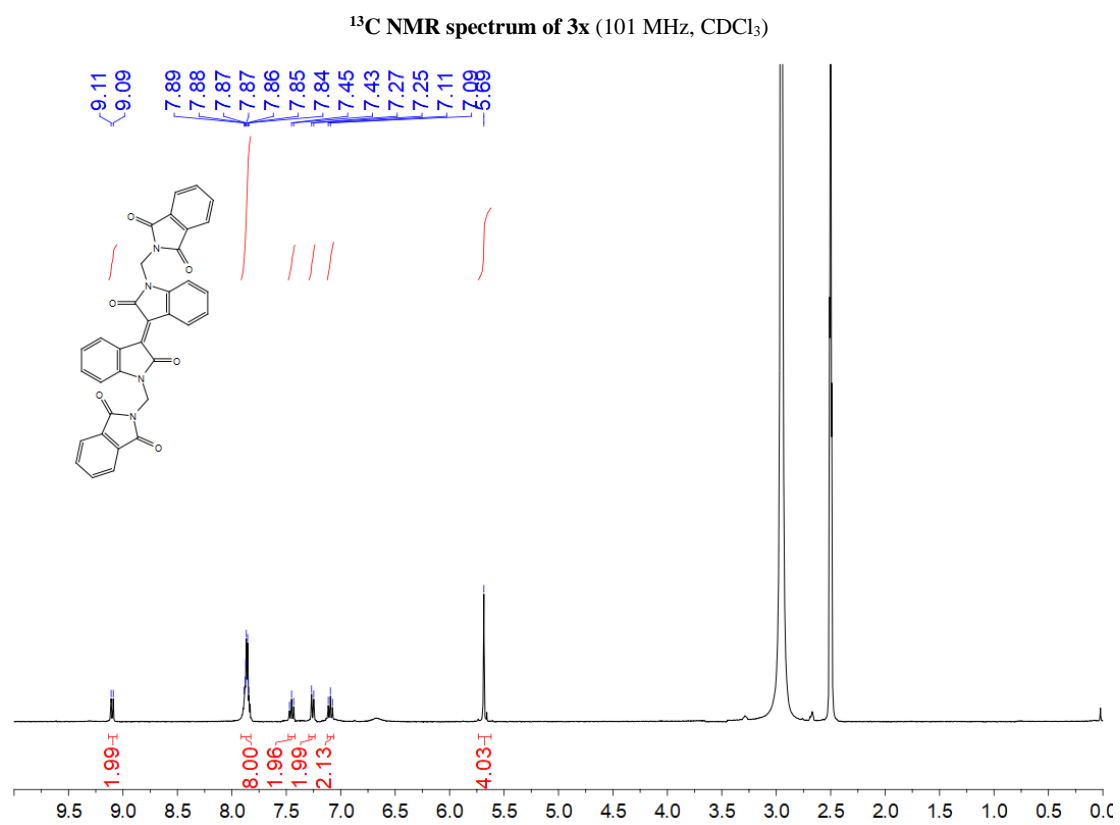



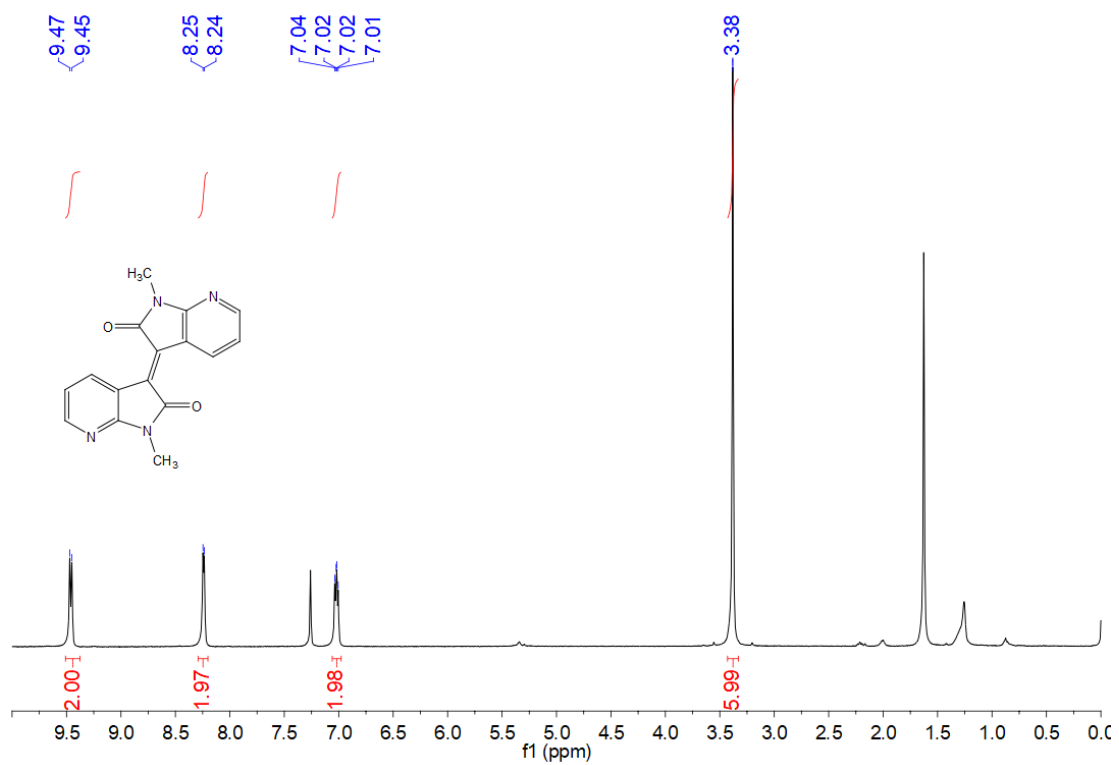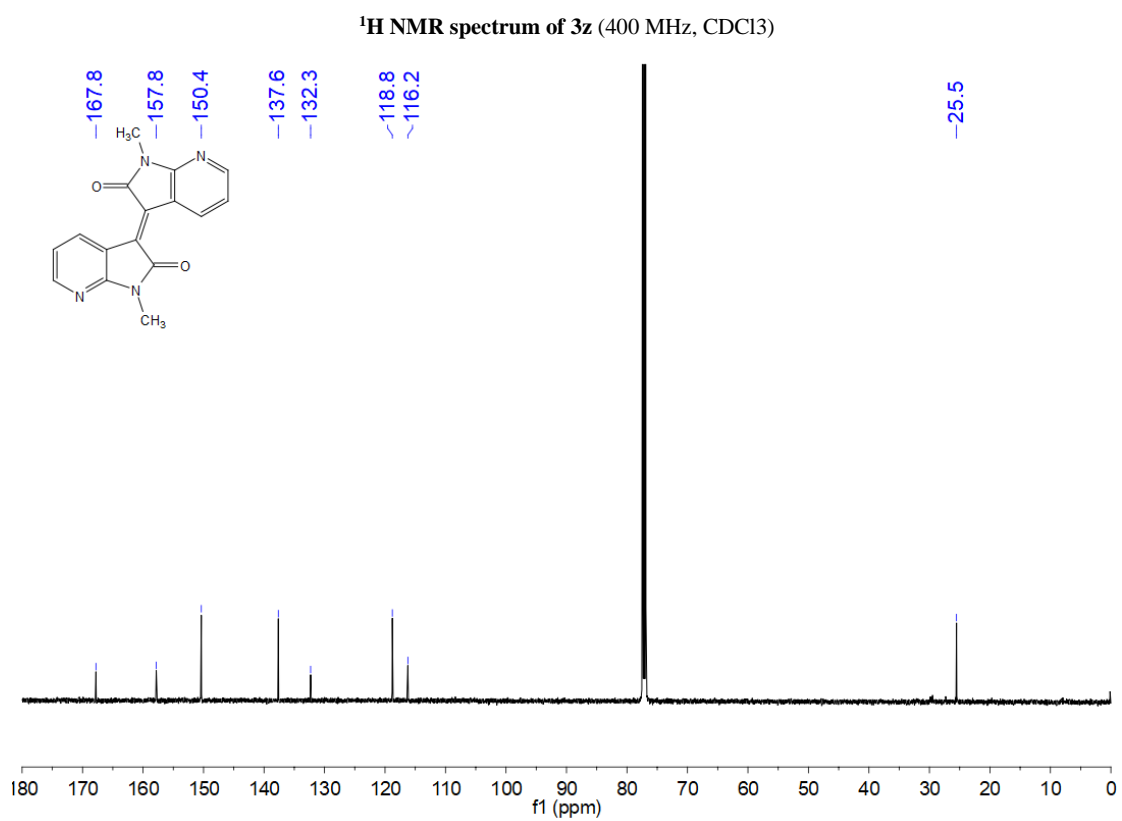

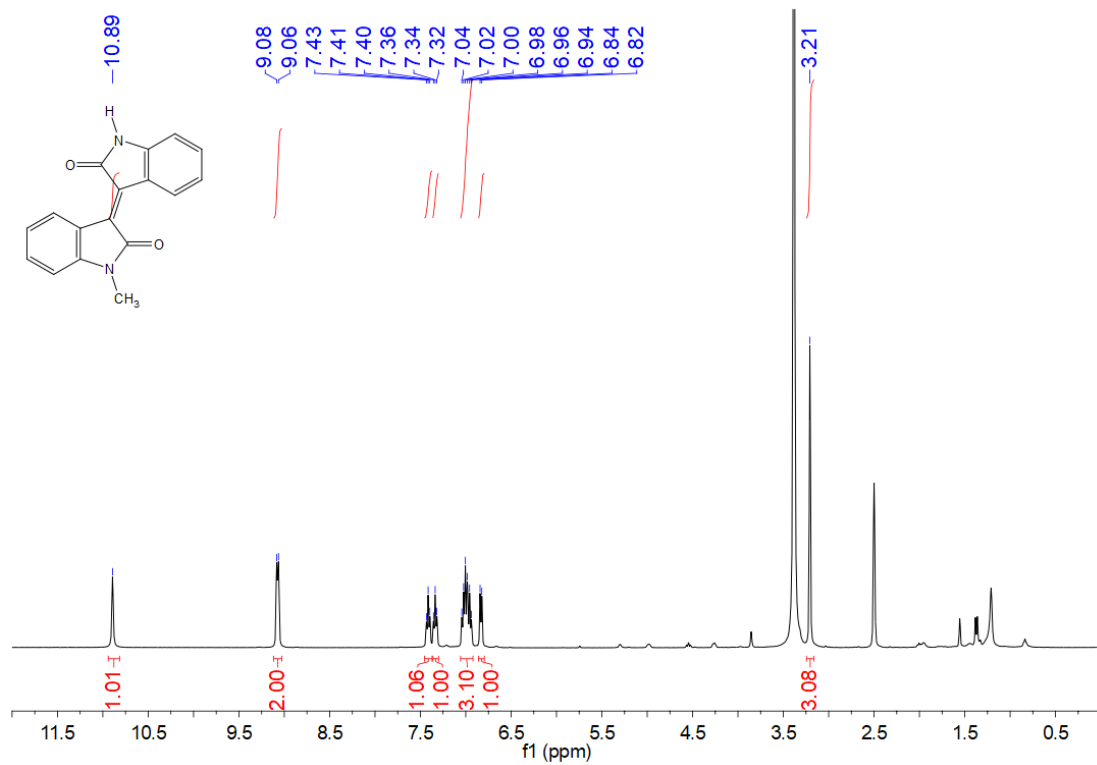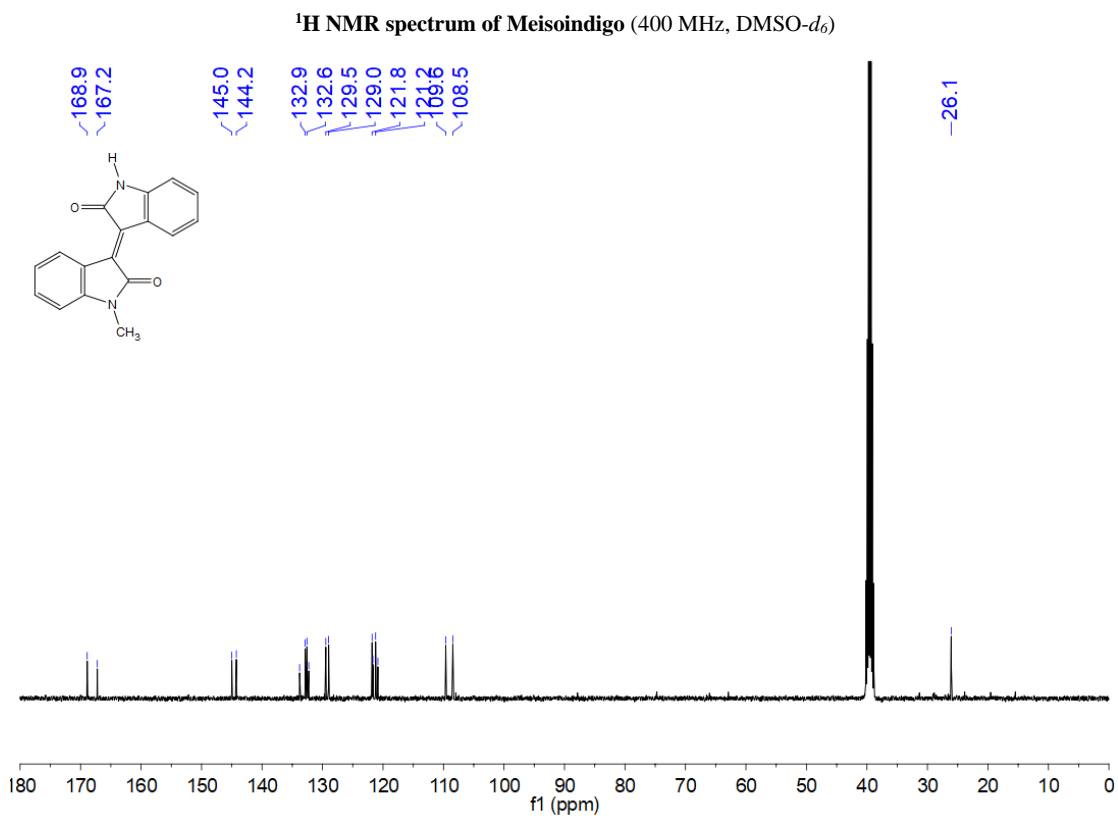

**<sup>13</sup>C NMR spectrum of Meisoindigo (101 MHz, DMSO-*d*<sub>6</sub>)**

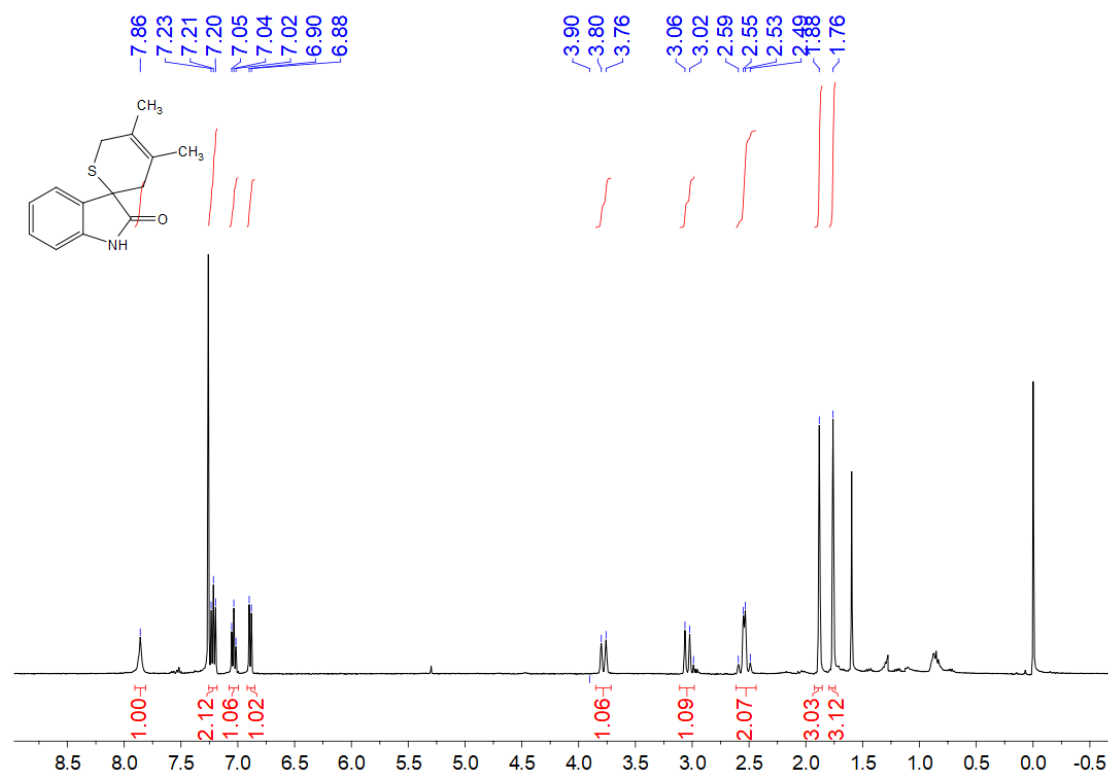

<sup>1</sup>H NMR spectrum of 4aa (400 MHz, CDCl<sub>3</sub>)

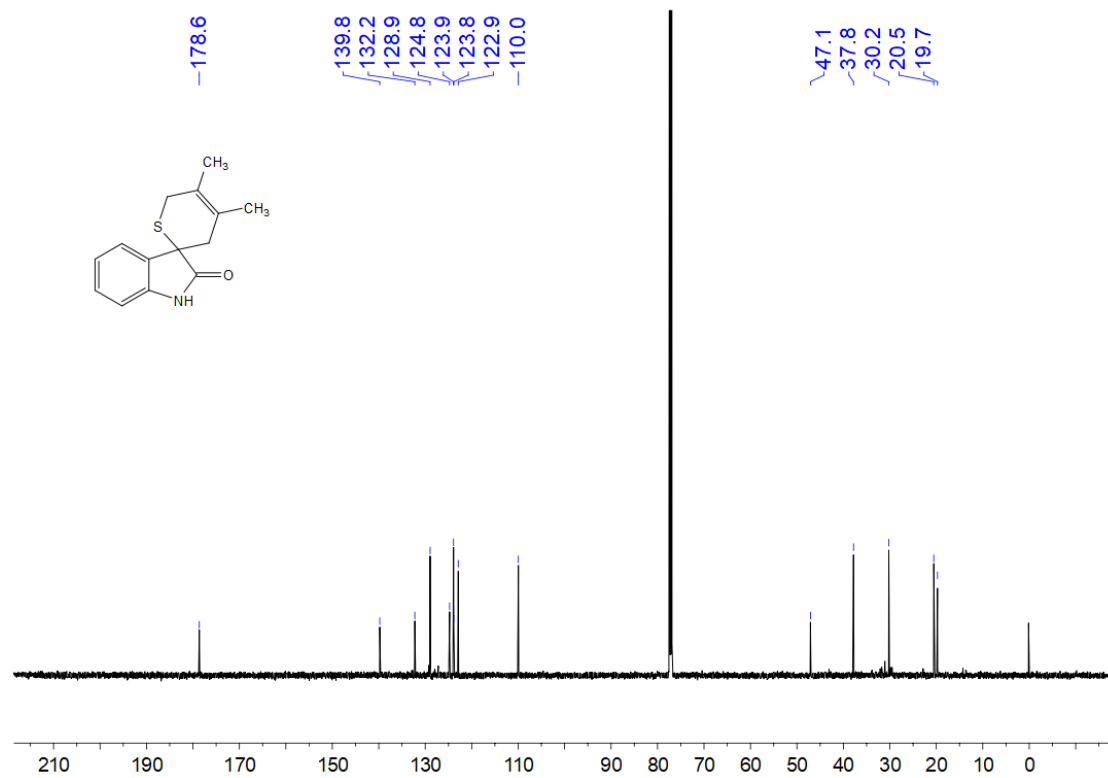

<sup>13</sup>C NMR spectrum of 4aa (151 MHz, CDCl<sub>3</sub>)

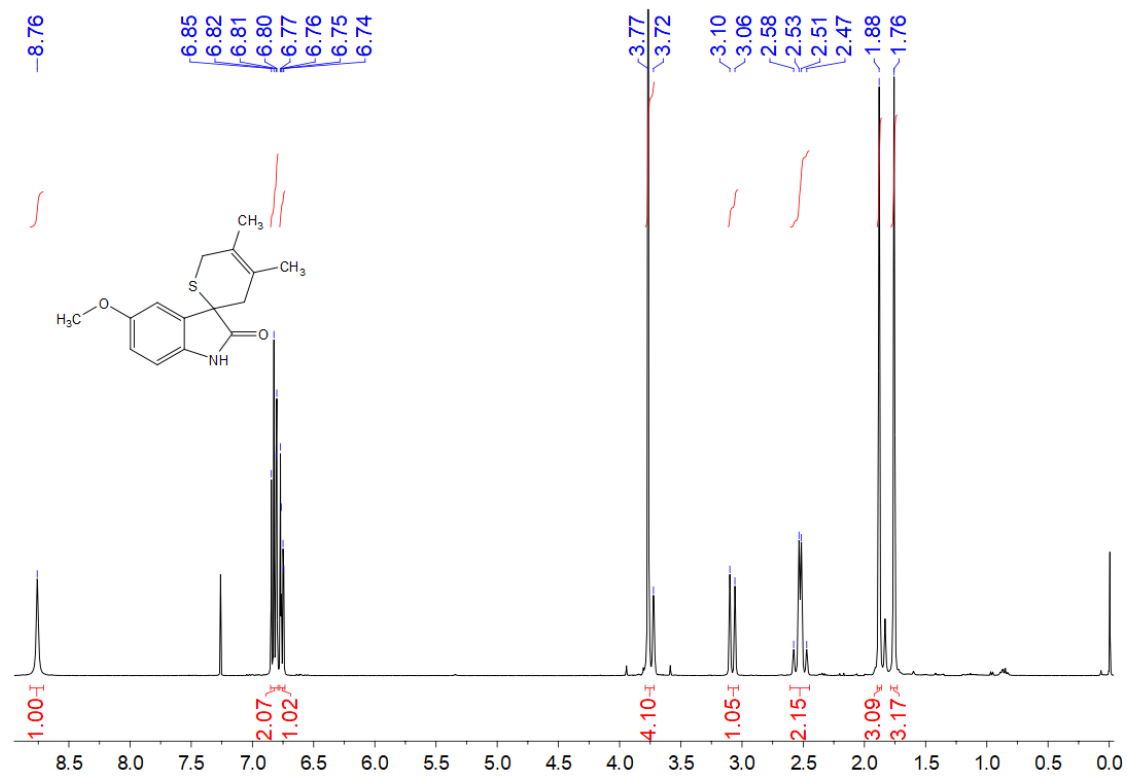

<sup>1</sup>H NMR spectrum of 4ca (400 MHz, CDCl<sub>3</sub>)

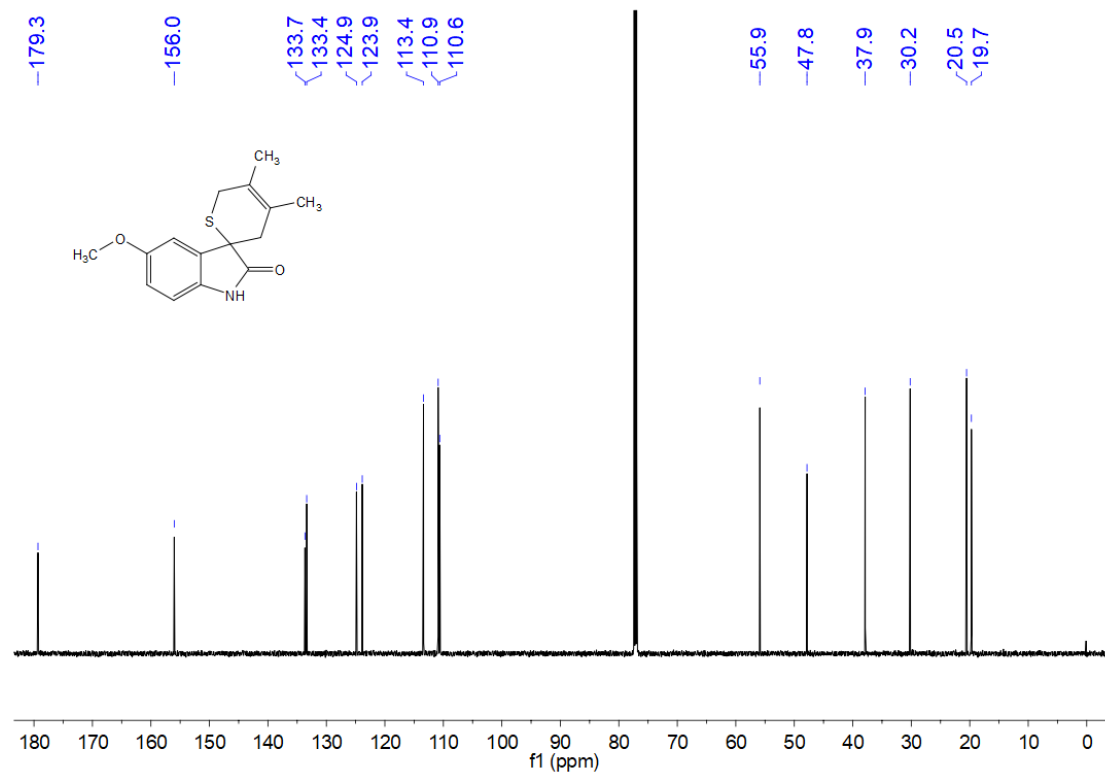

<sup>13</sup>C NMR spectrum of 4ca (151 MHz, CDCl<sub>3</sub>)

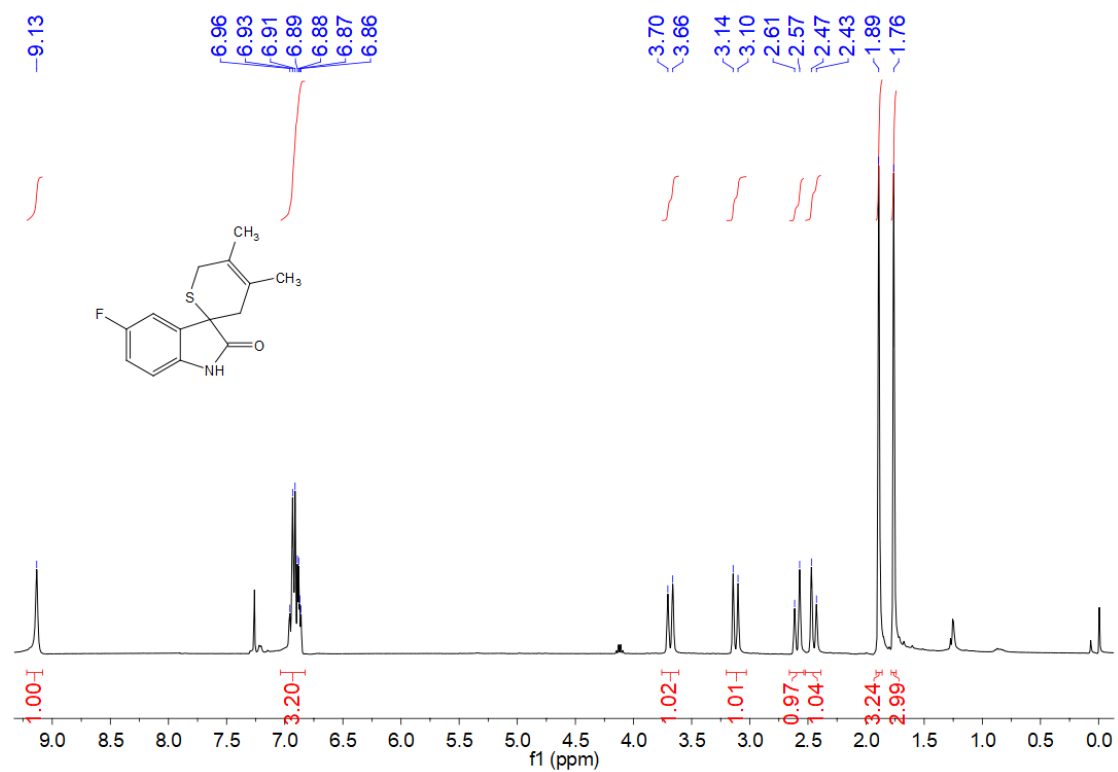

<sup>1</sup>H NMR spectrum of 4da (400 MHz, CDCl<sub>3</sub>)

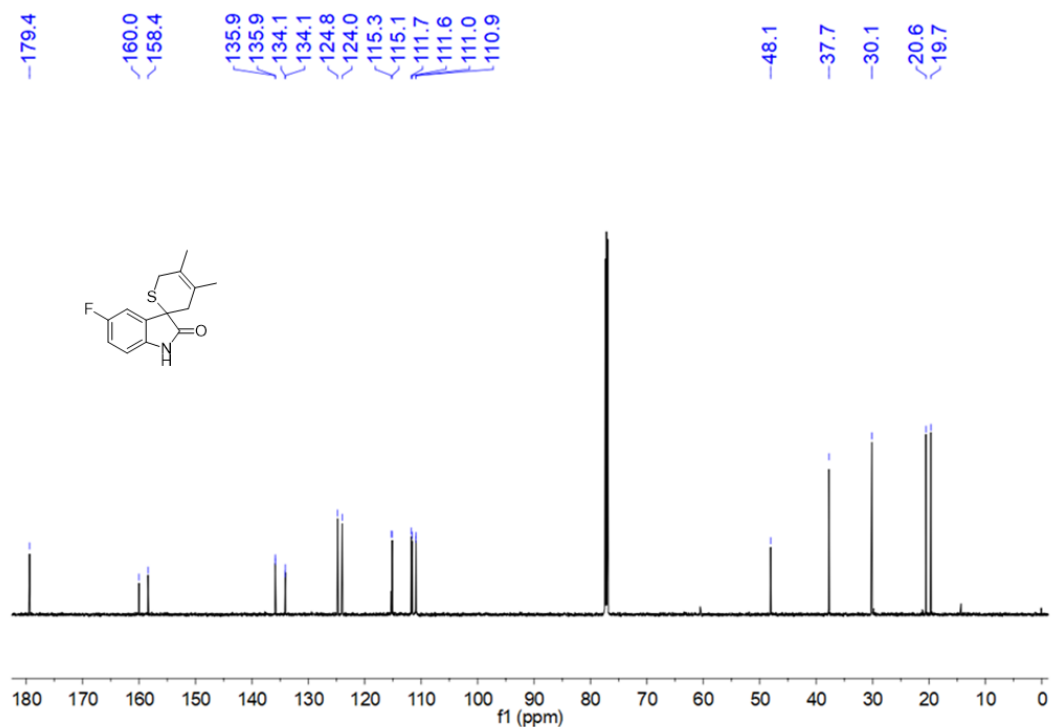

<sup>13</sup>C NMR spectrum of 4da (151 MHz, CDCl<sub>3</sub>)

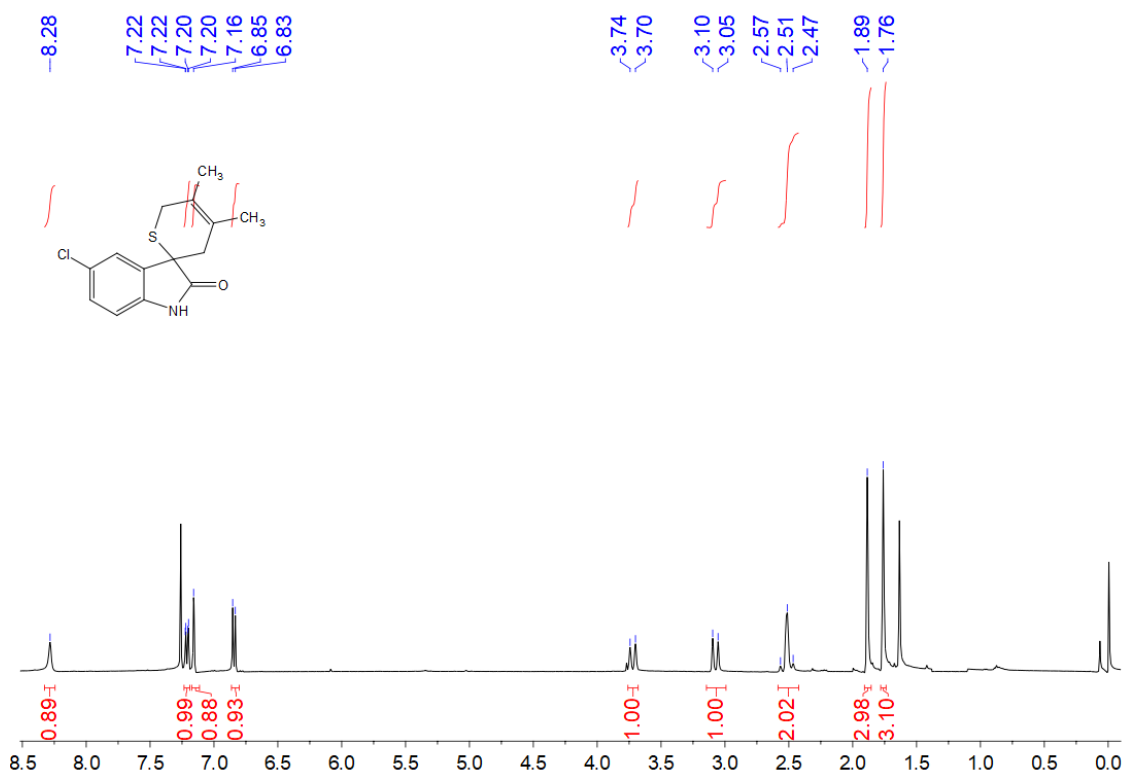

$^1\text{H}$  NMR spectrum of 4ea (400 MHz,  $\text{CDCl}_3$ )

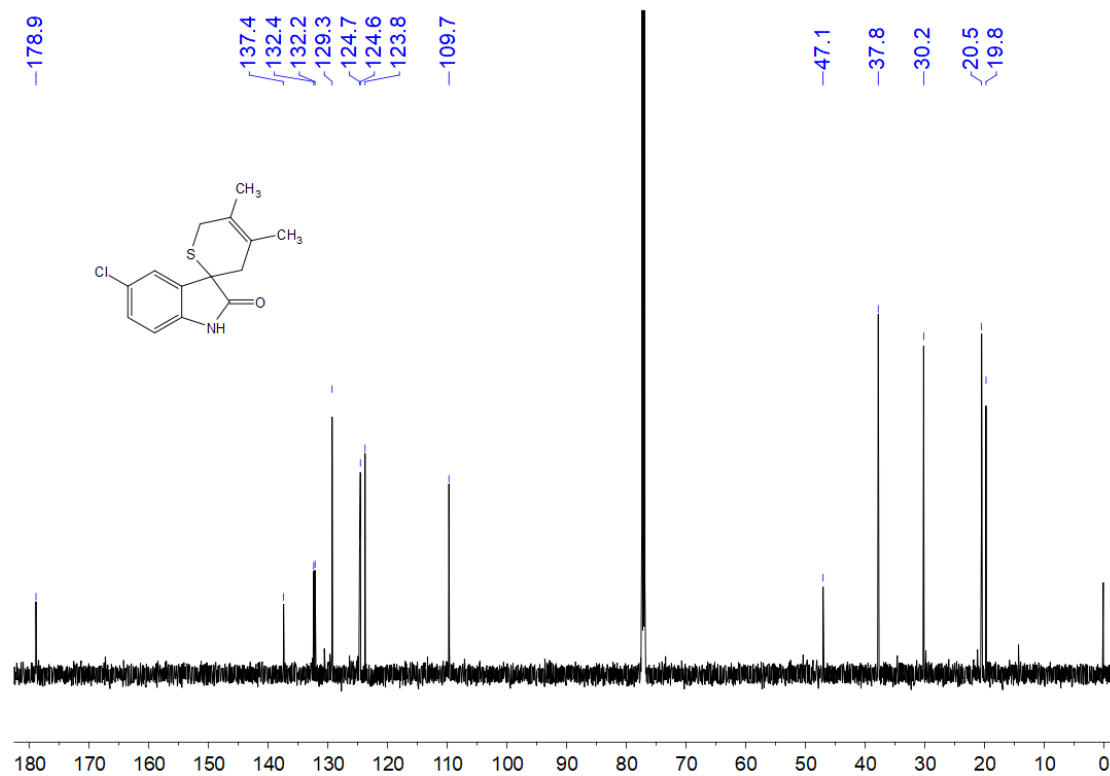

$^{13}\text{C}$  NMR spectrum of 4ea (151 MHz,  $\text{CDCl}_3$ )

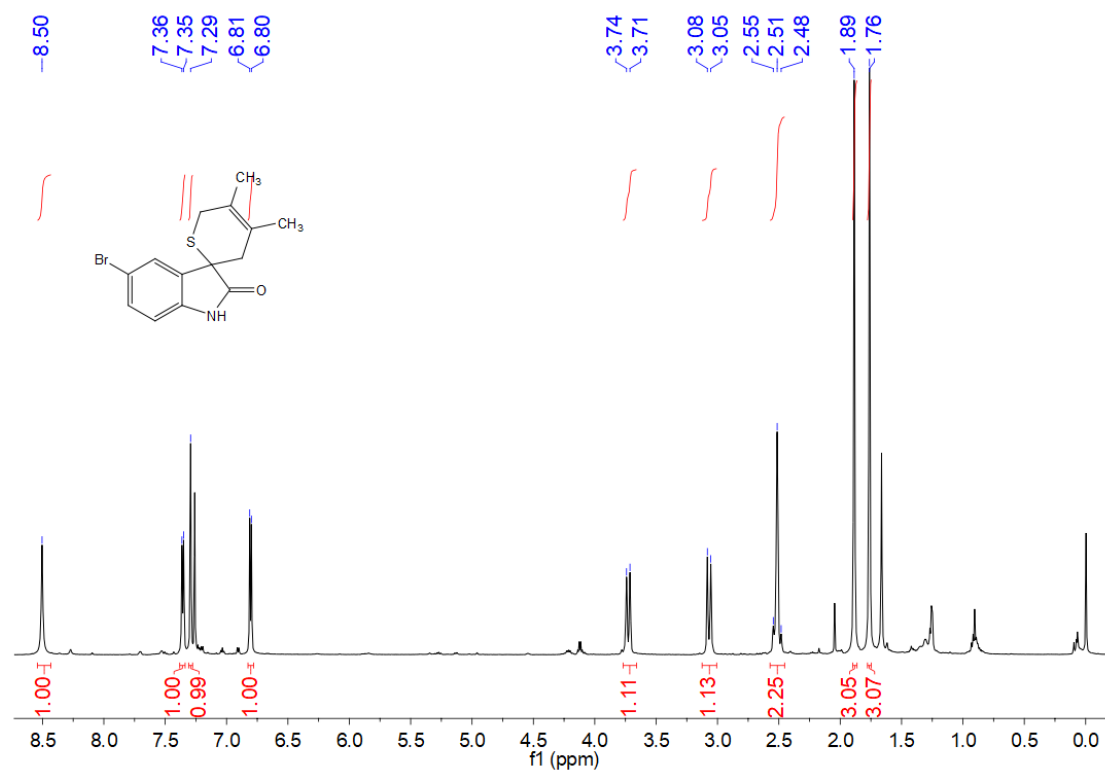

**<sup>1</sup>H NMR spectrum of 4fa (600 MHz, CDCl<sub>3</sub>)**

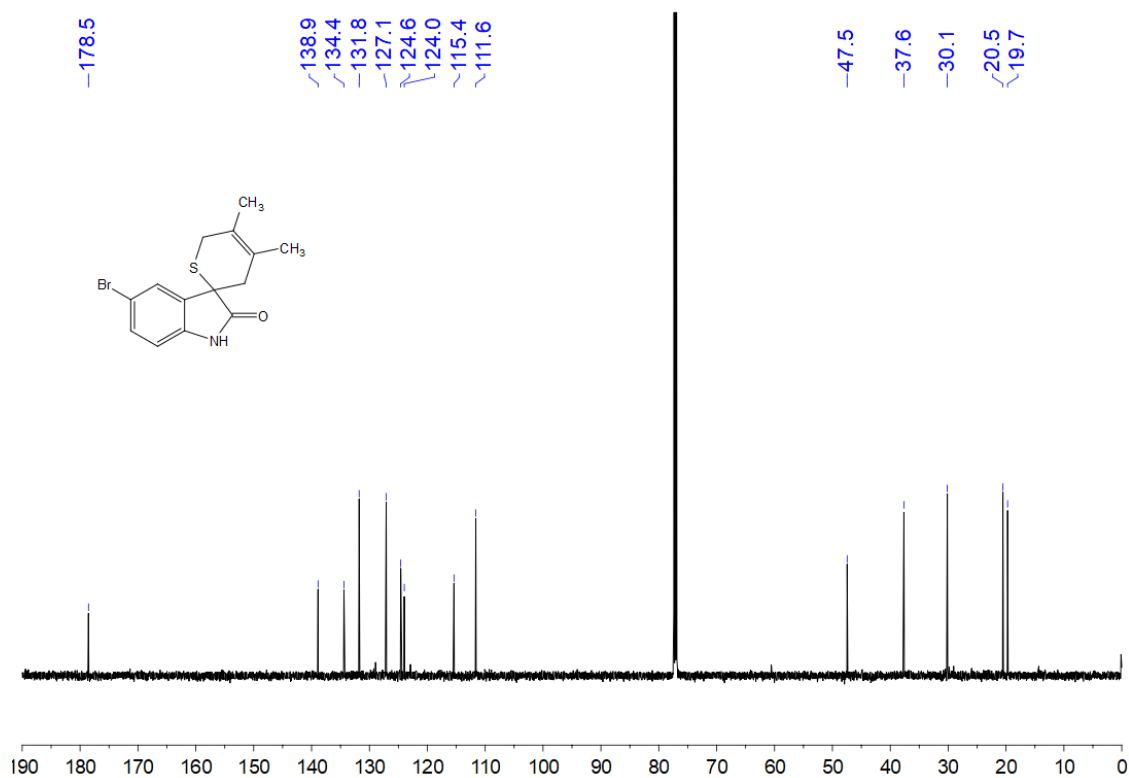

**<sup>13</sup>C NMR spectrum of 4fa (151 MHz, CDCl<sub>3</sub>)**

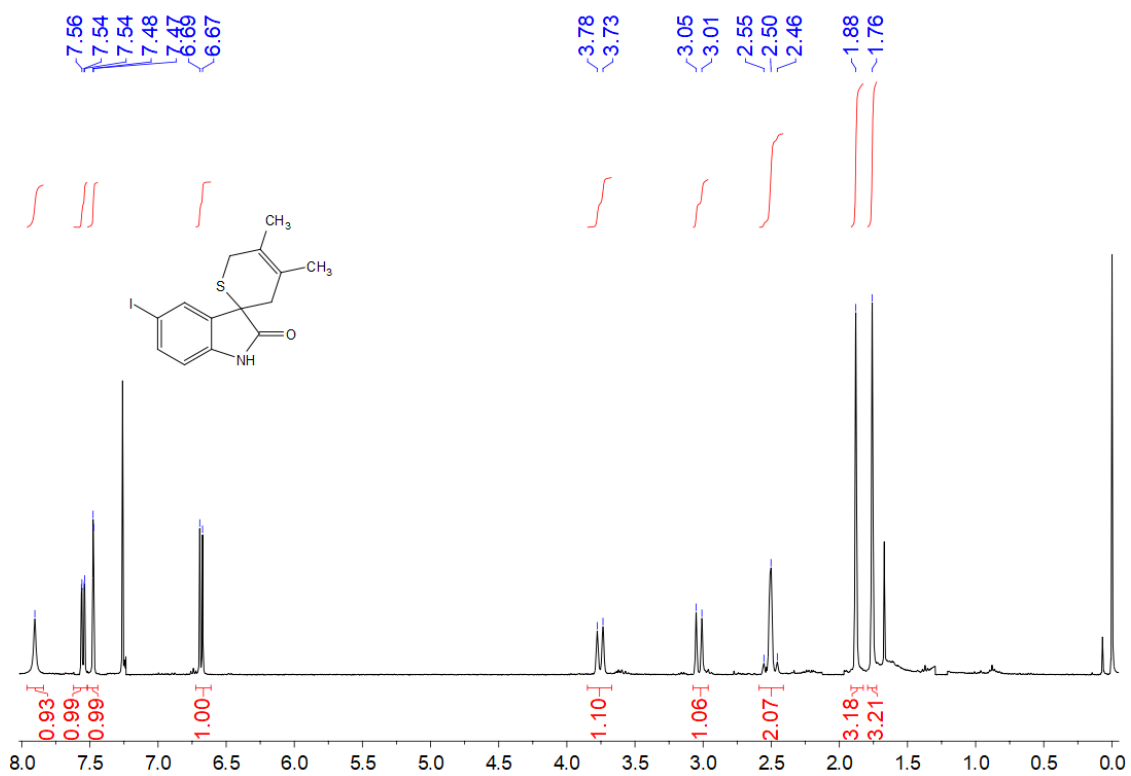

<sup>1</sup>H NMR spectrum of 4ga (400 MHz, CDCl<sub>3</sub>)

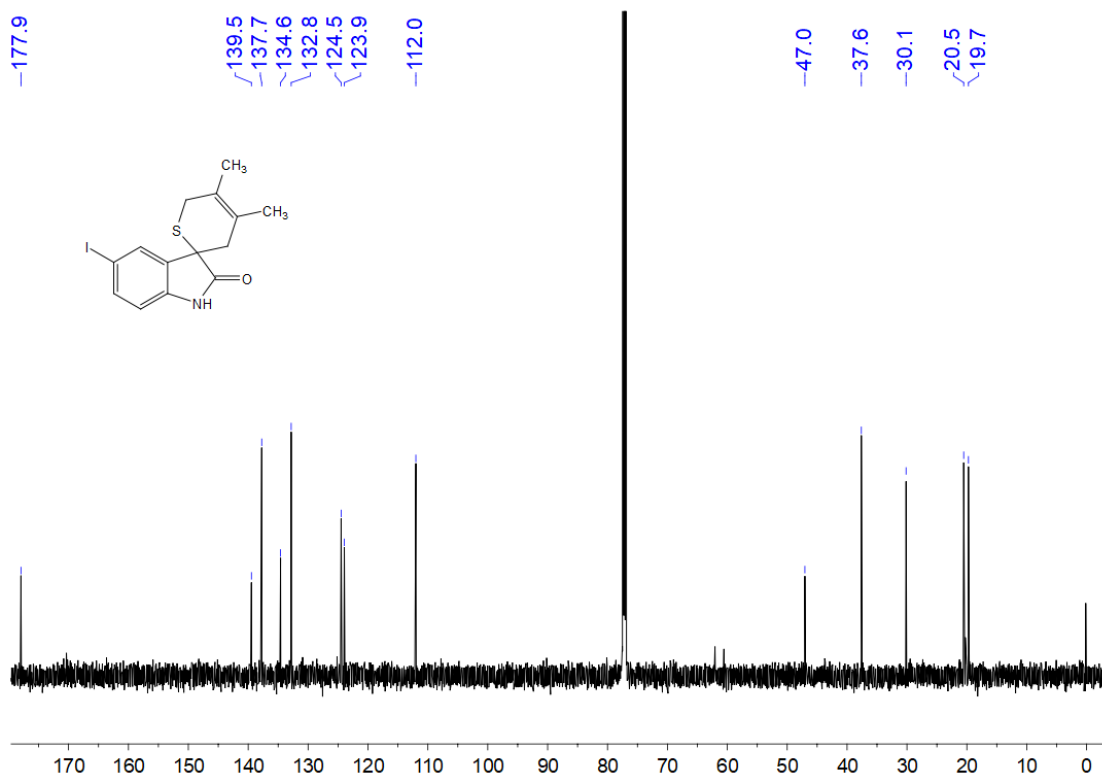

<sup>13</sup>C NMR spectrum of 4ga (151 MHz, CDCl<sub>3</sub>)



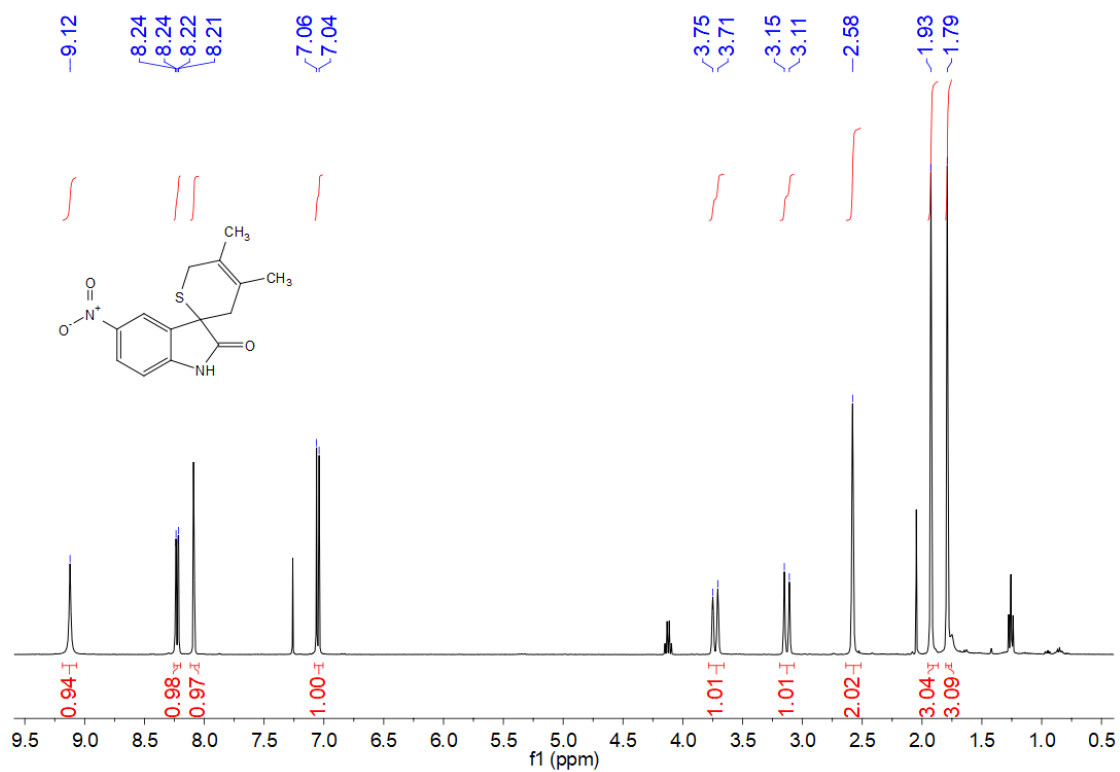

<sup>1</sup>H NMR spectrum of 4a\*a (400 MHz, CDCl<sub>3</sub>)

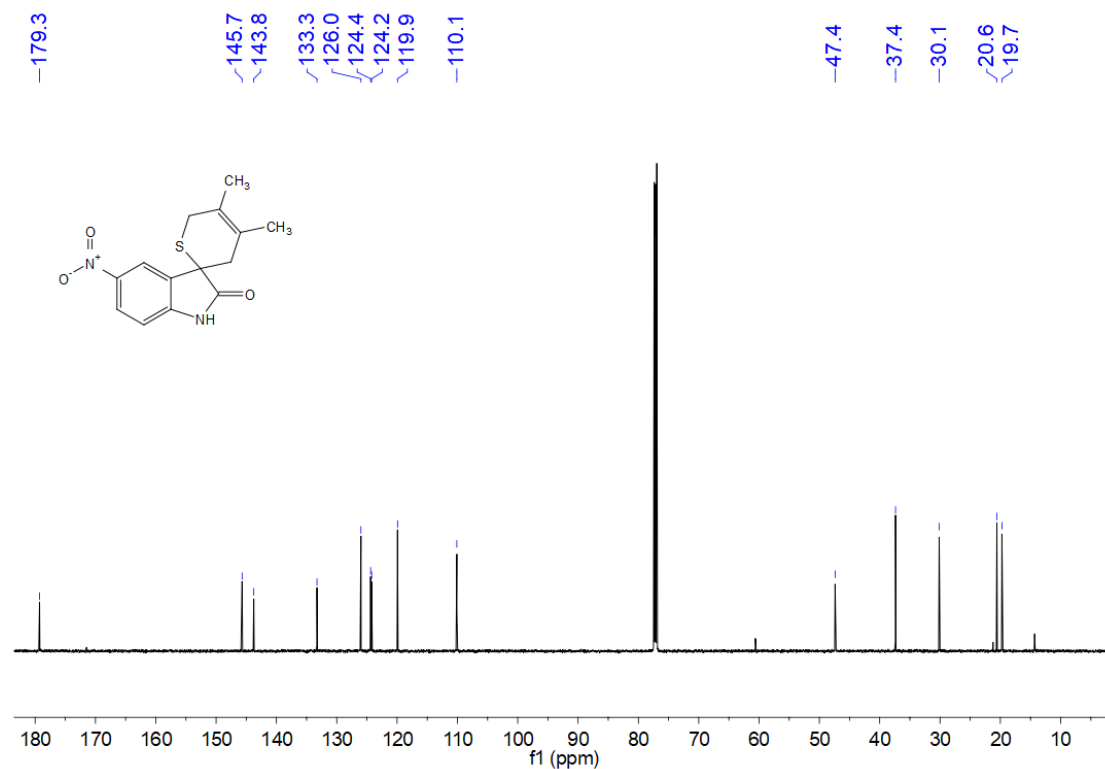

<sup>13</sup>C NMR spectrum of 4a\*a (151 MHz, CDCl<sub>3</sub>)

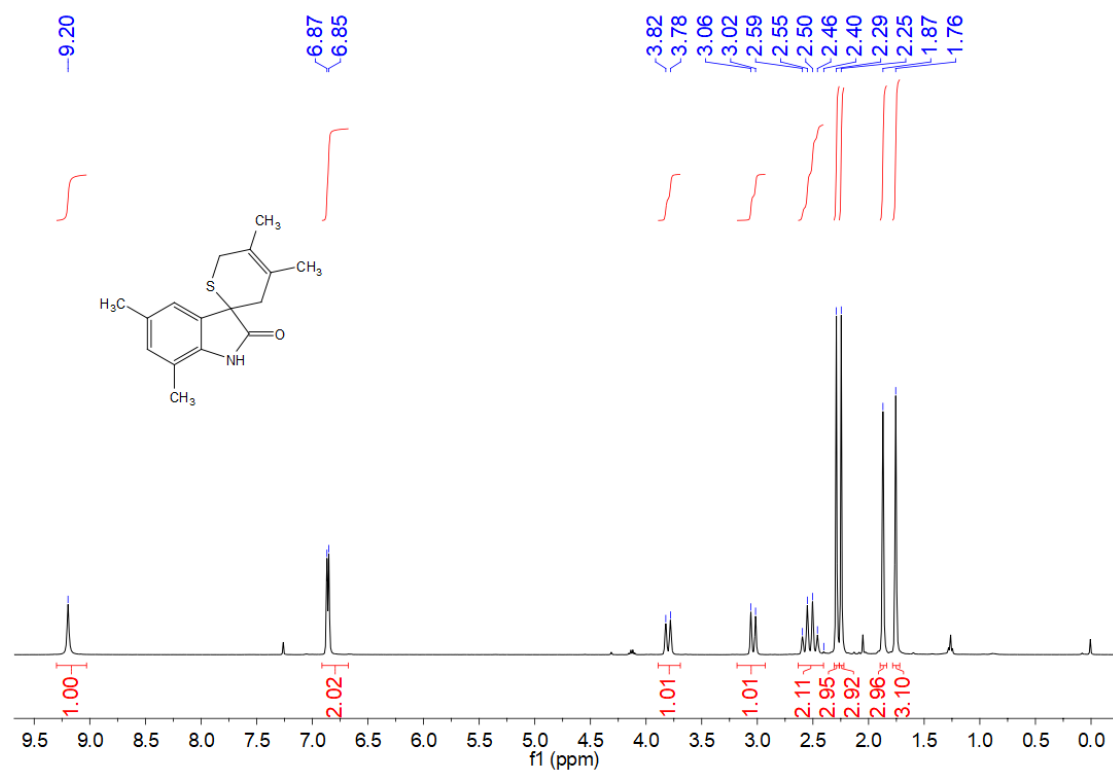

<sup>1</sup>H NMR spectrum of 4b\*a (400 MHz, CDCl<sub>3</sub>)

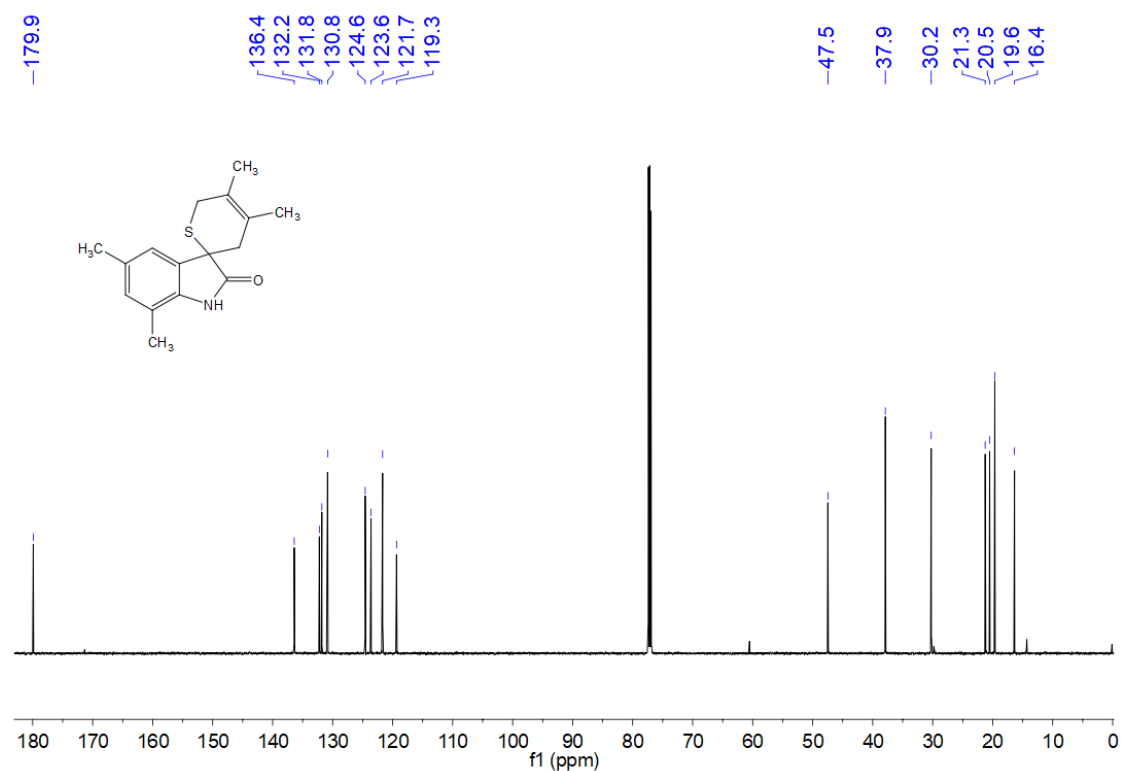

<sup>13</sup>C NMR spectrum of 4b\*a (151 MHz, CDCl<sub>3</sub>)

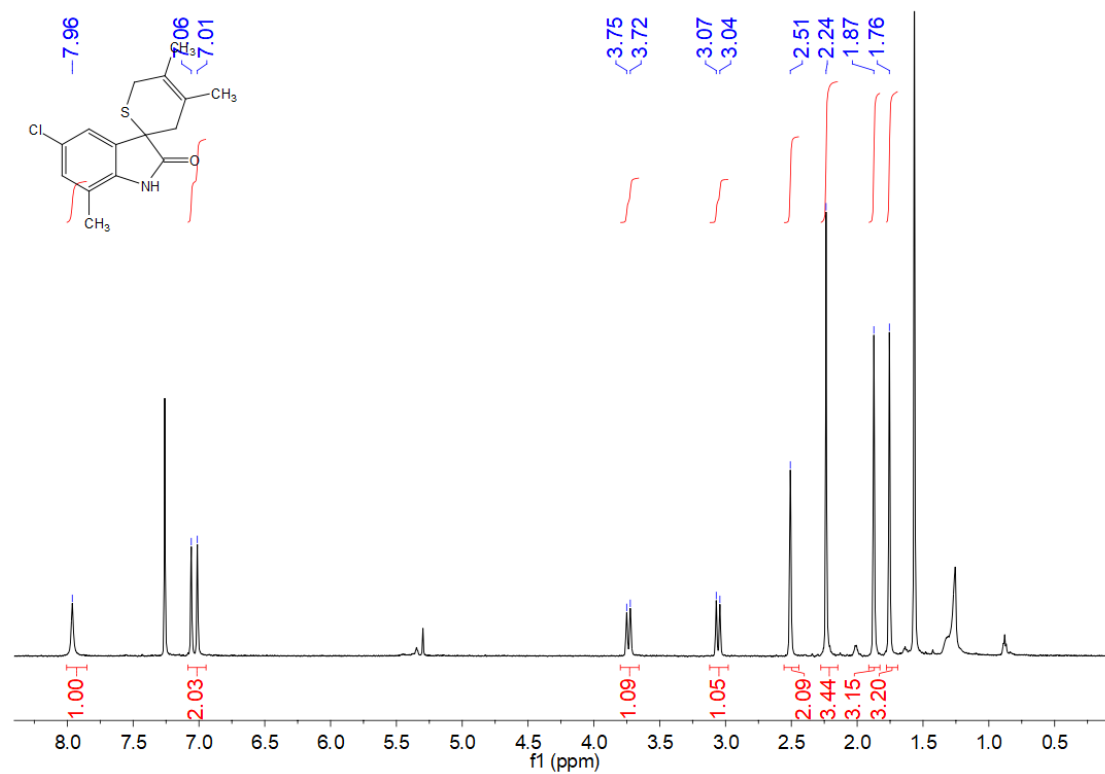

<sup>1</sup>H NMR spectrum of 4c\*a (600 MHz, CDCl<sub>3</sub>)

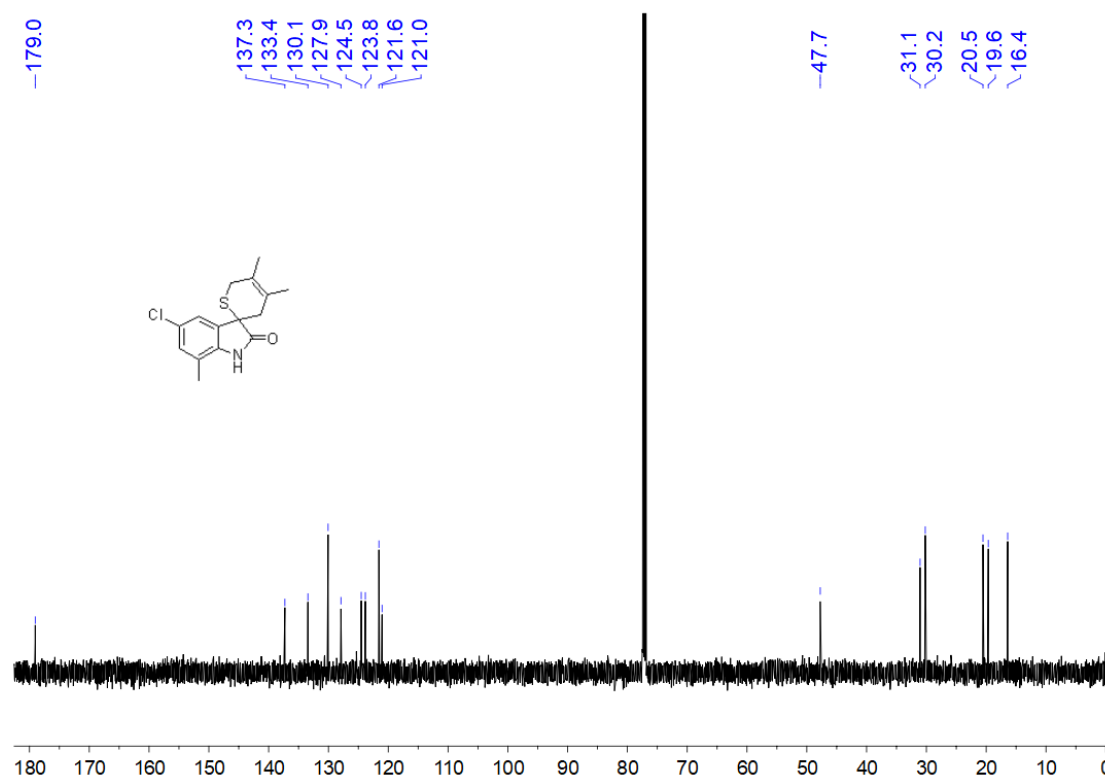

<sup>13</sup>C NMR spectrum of 4c\*a (151 MHz, CDCl<sub>3</sub>)

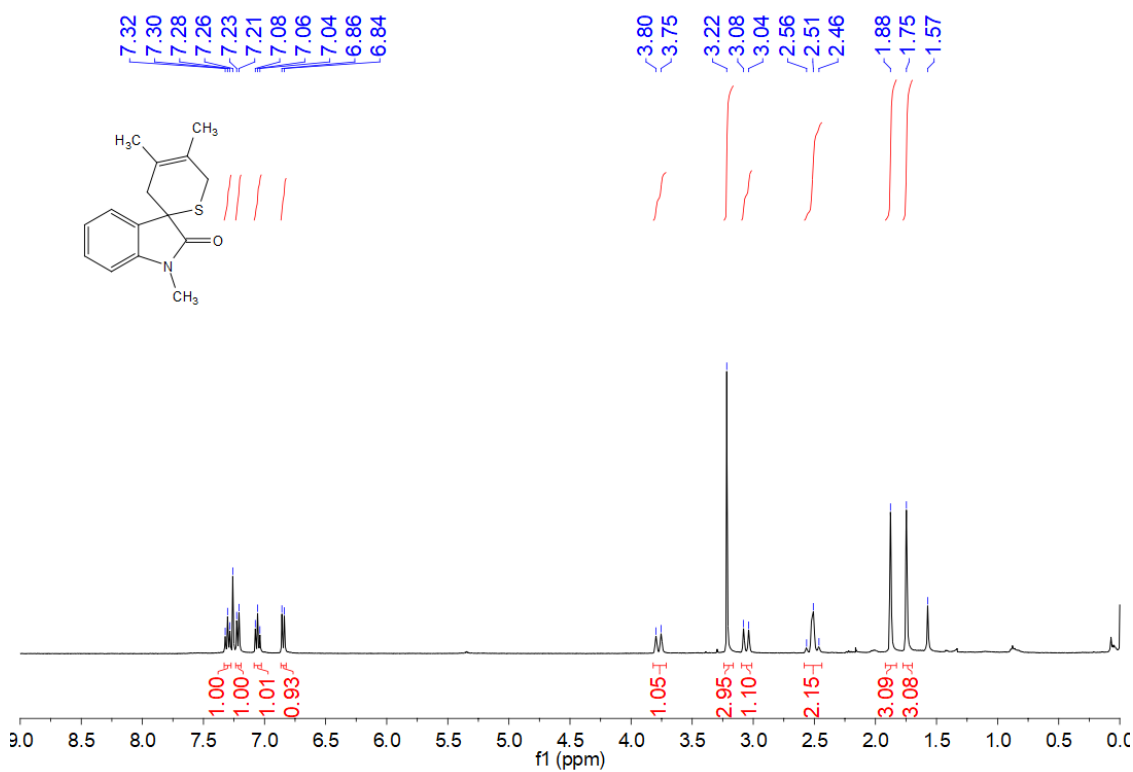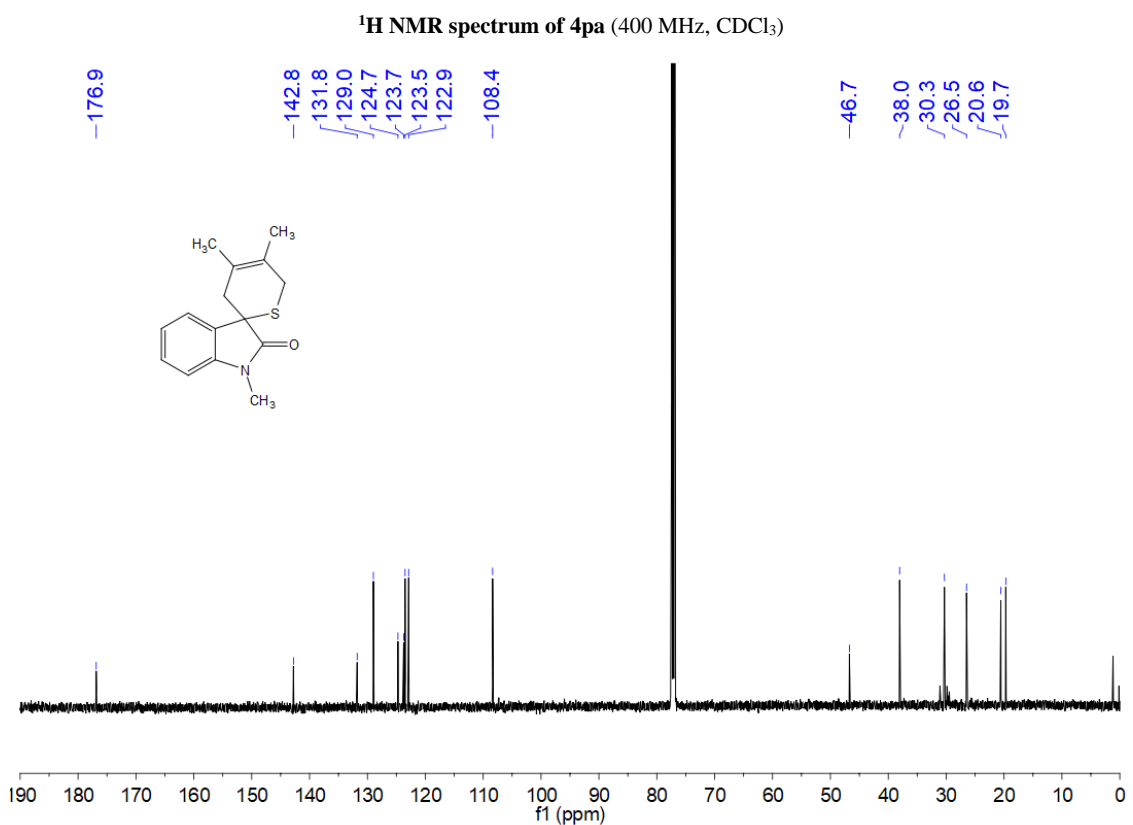

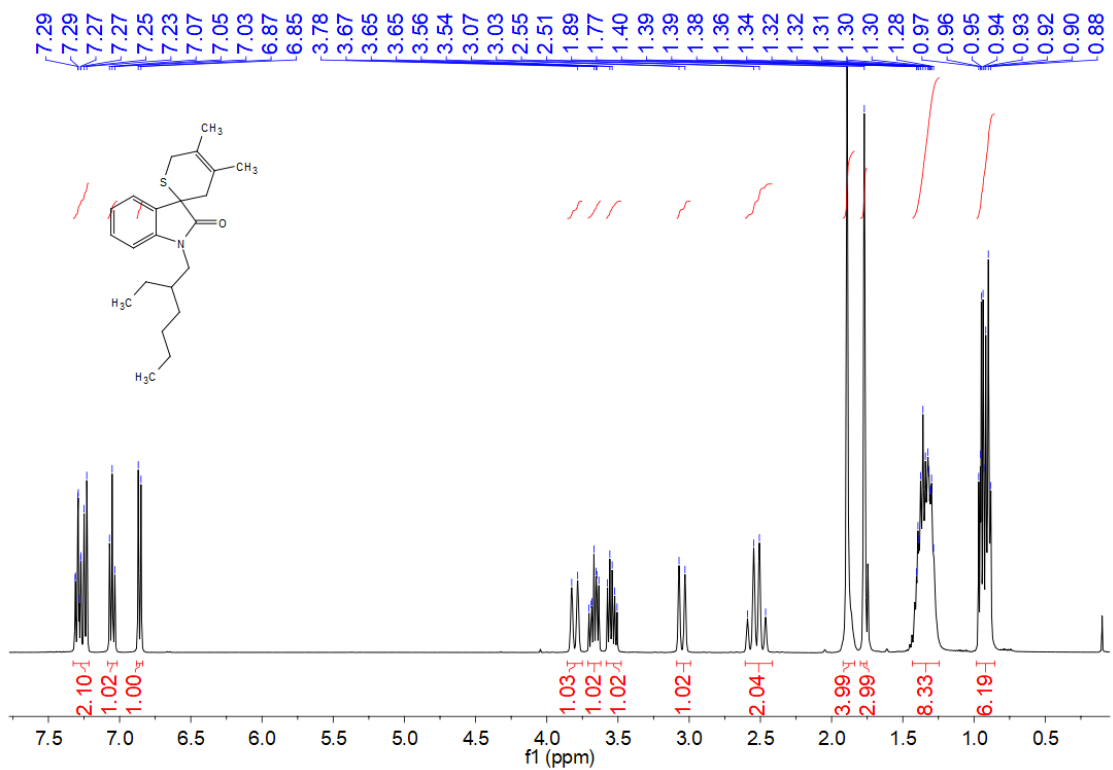

<sup>1</sup>H NMR spectrum of 4qa (400 MHz, CDCl<sub>3</sub>)

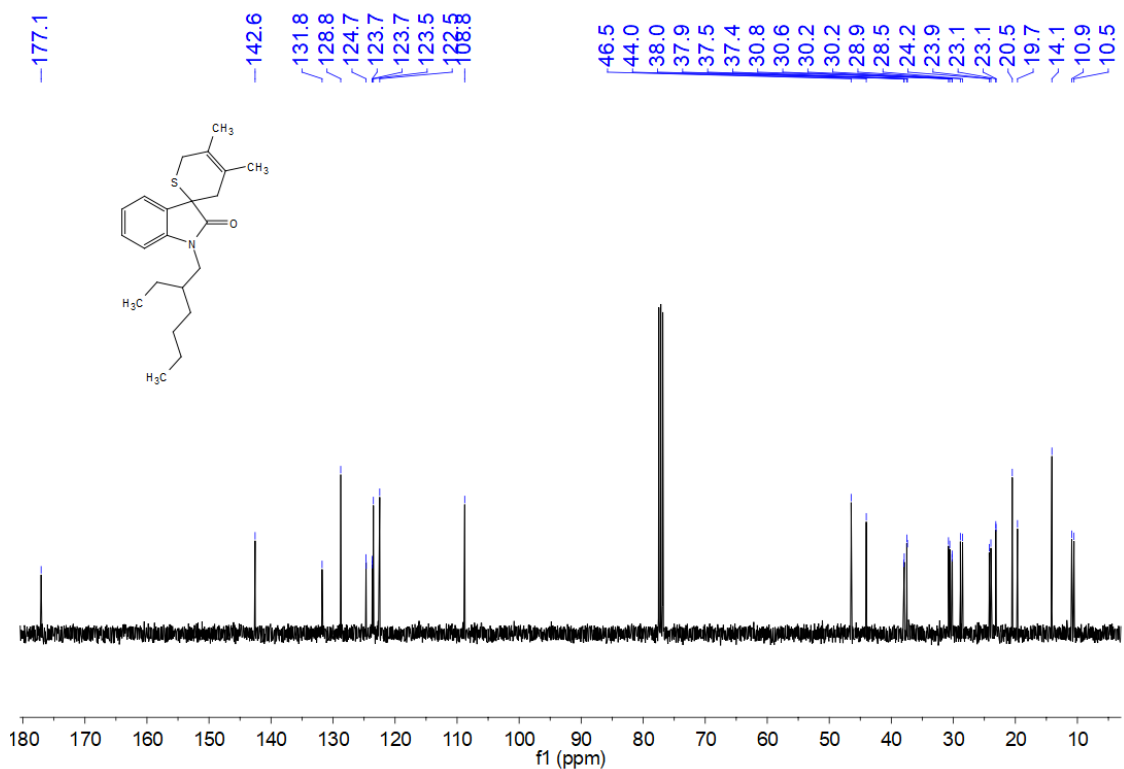

<sup>13</sup>C NMR spectrum of 4qa (101 MHz, CDCl<sub>3</sub>)

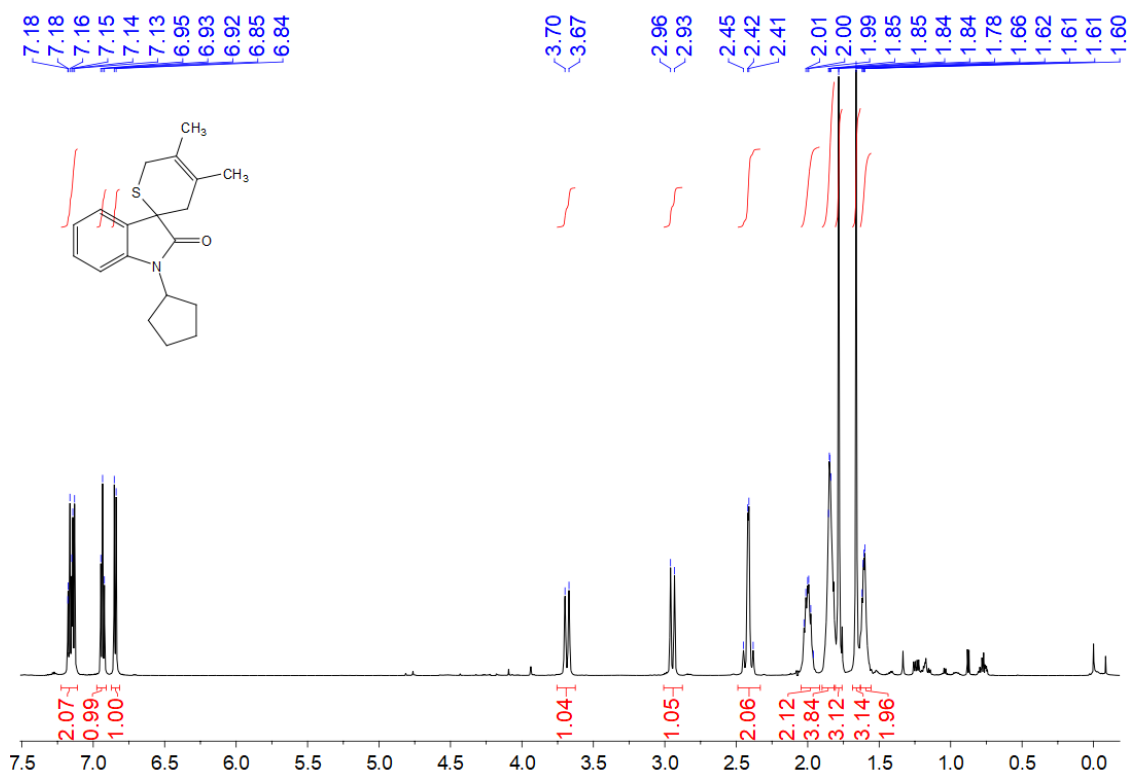

<sup>1</sup>H NMR spectrum of 4ra (600 MHz, CDCl<sub>3</sub>)

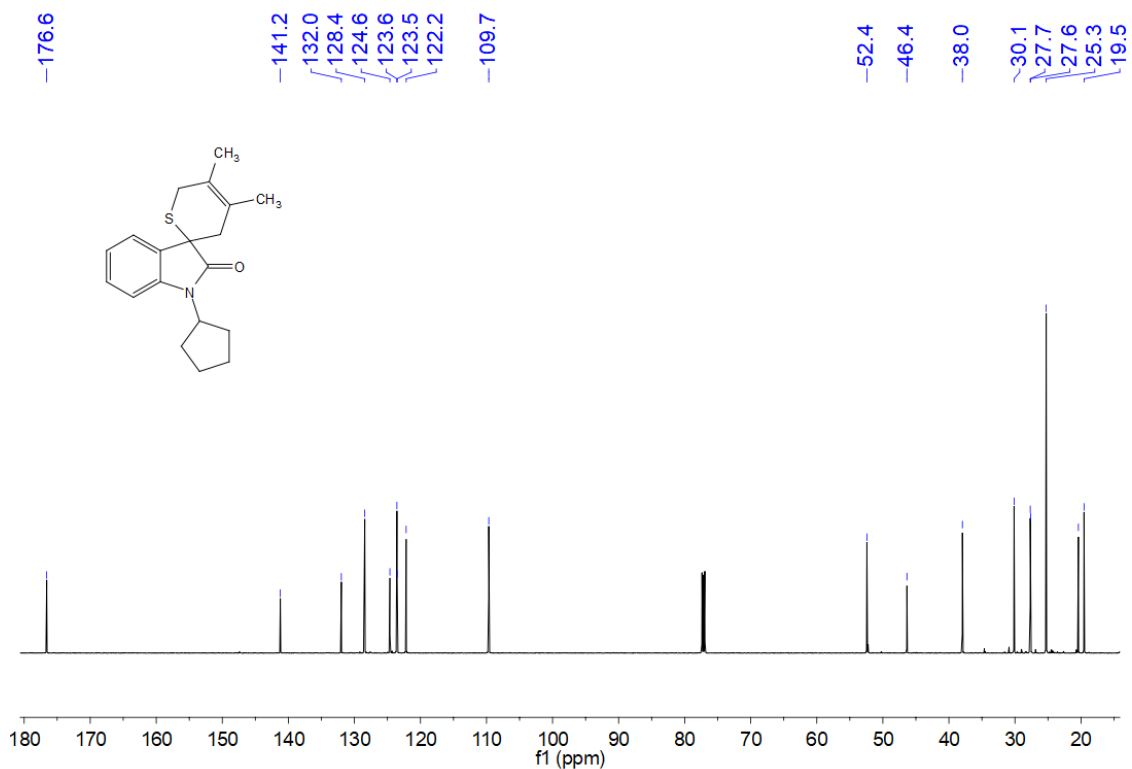

<sup>13</sup>C NMR spectrum of 4ra (151 MHz, CDCl<sub>3</sub>)

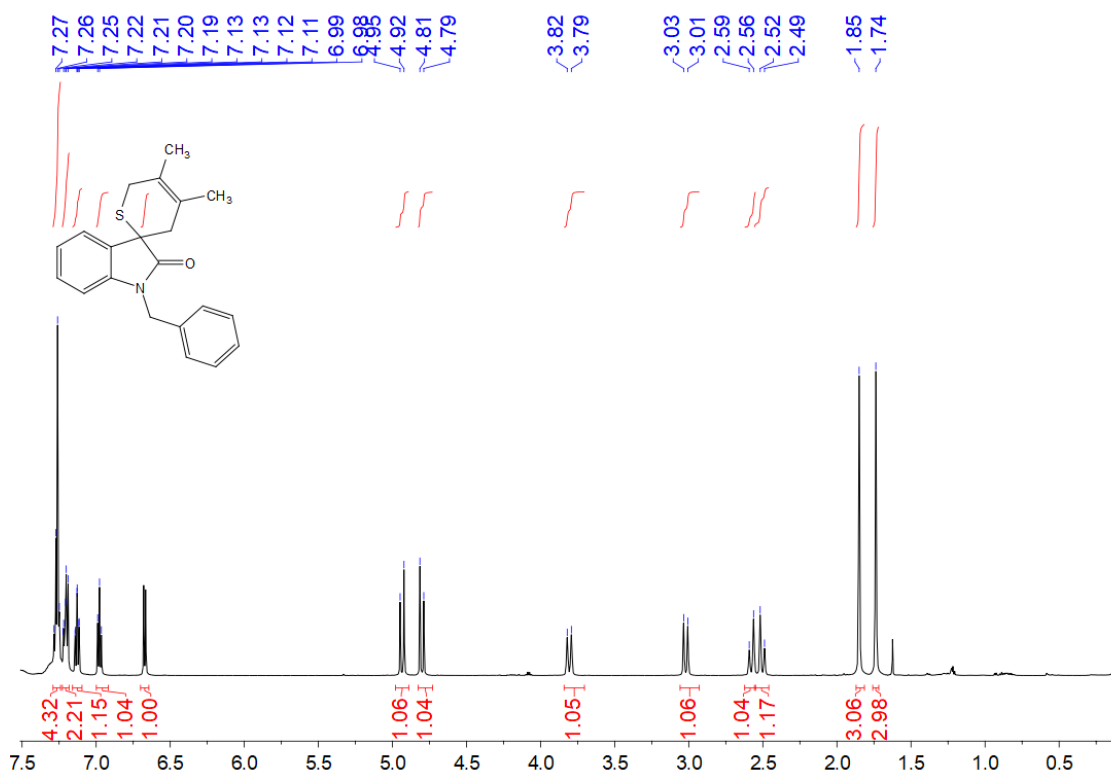

<sup>1</sup>H NMR spectrum of 4sa (600 MHz, CDCl<sub>3</sub>)

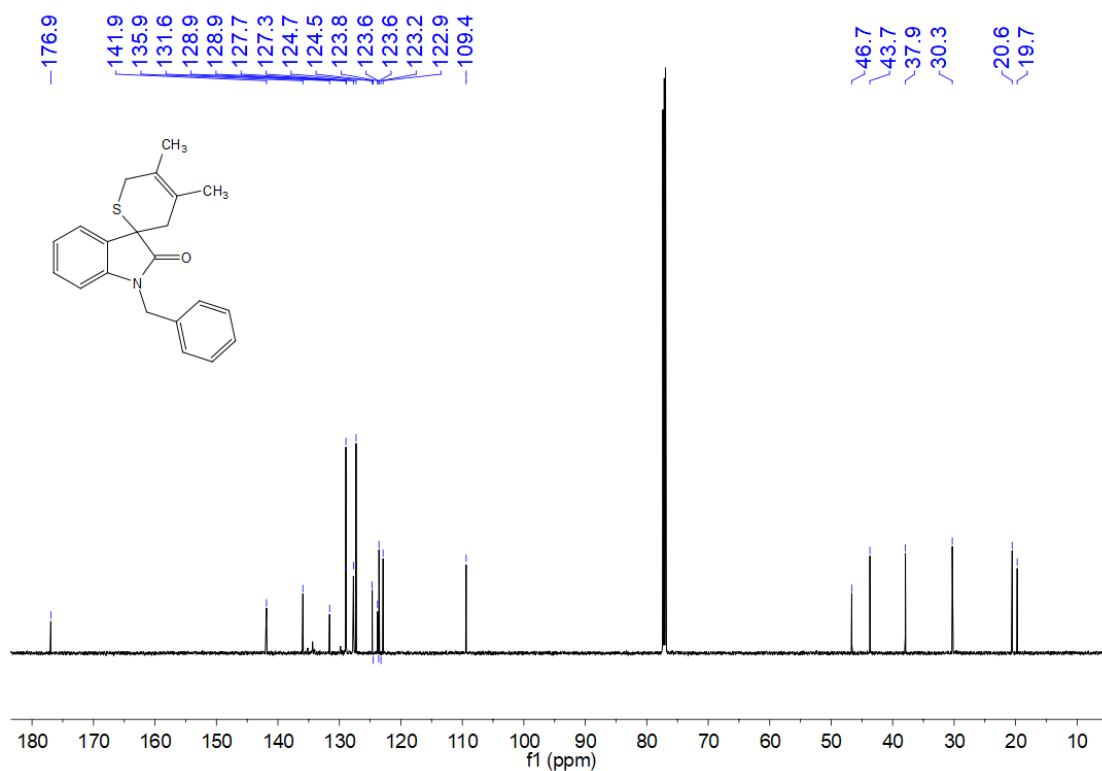

<sup>13</sup>C NMR spectrum of 4sa (151MHz, CDCl<sub>3</sub>)

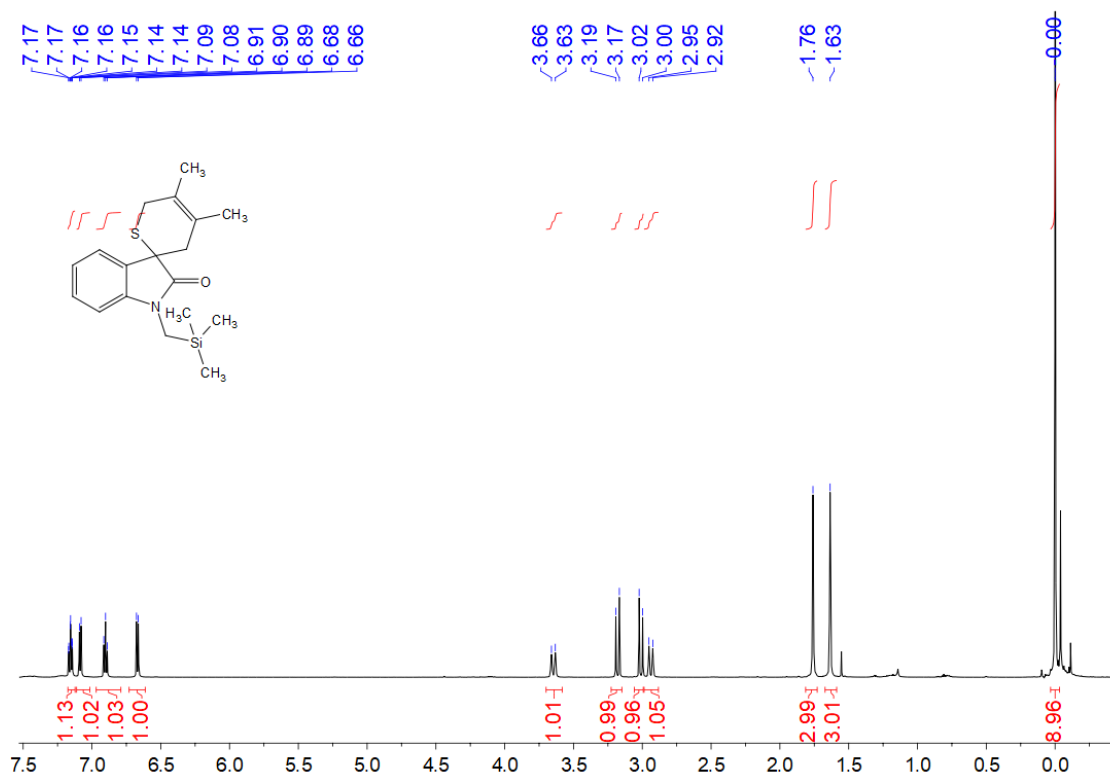

<sup>1</sup>H NMR spectrum of 4va (600 MHz, CDCl<sub>3</sub>)

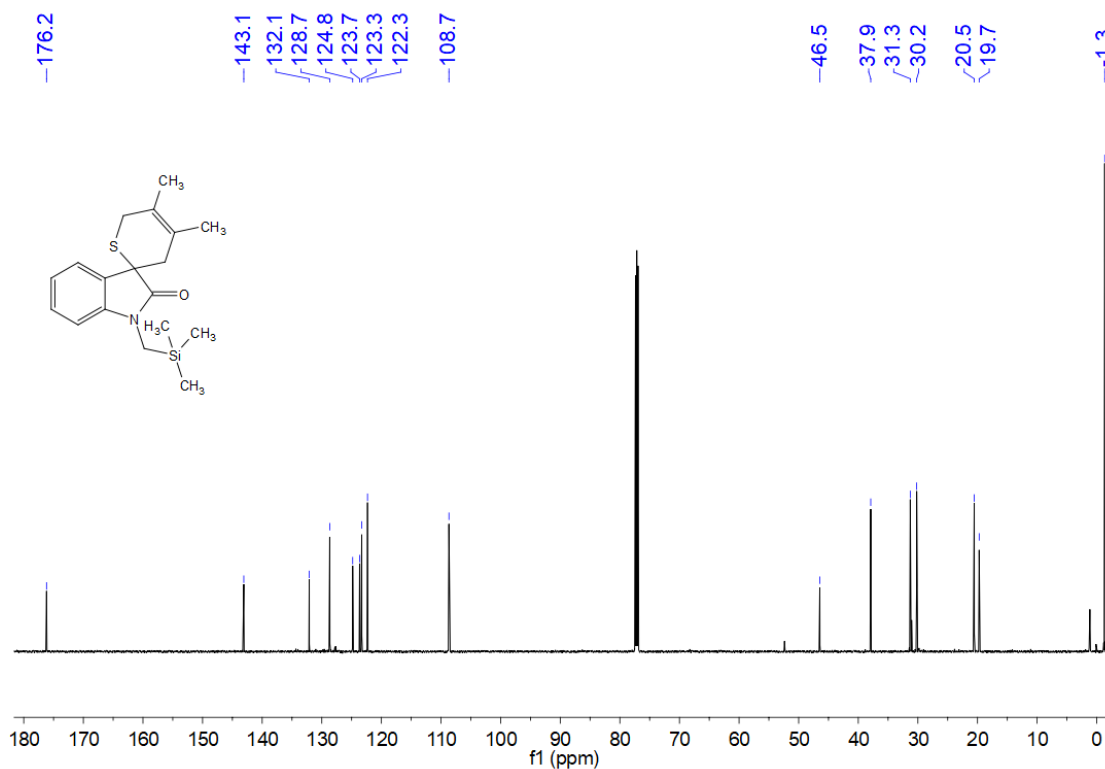

<sup>13</sup>C NMR spectrum of 4va (151 MHz, CDCl<sub>3</sub>)



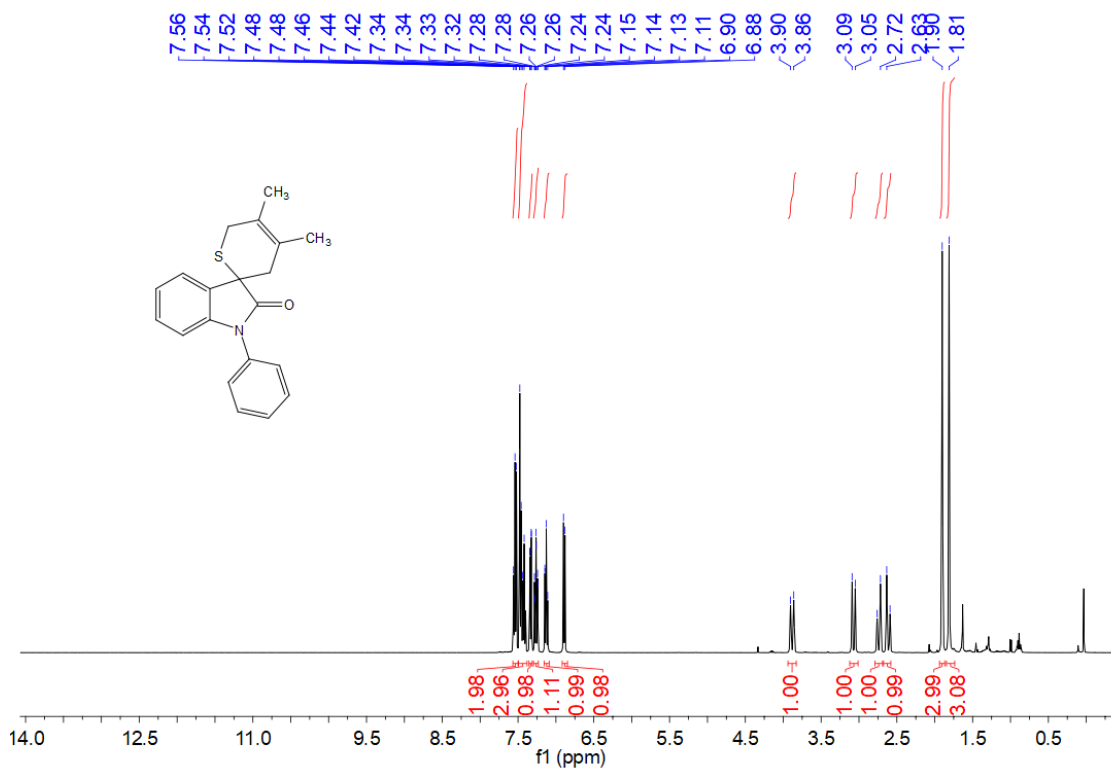

<sup>1</sup>H NMR spectrum of 4wa (400 MHz, CDCl<sub>3</sub>)

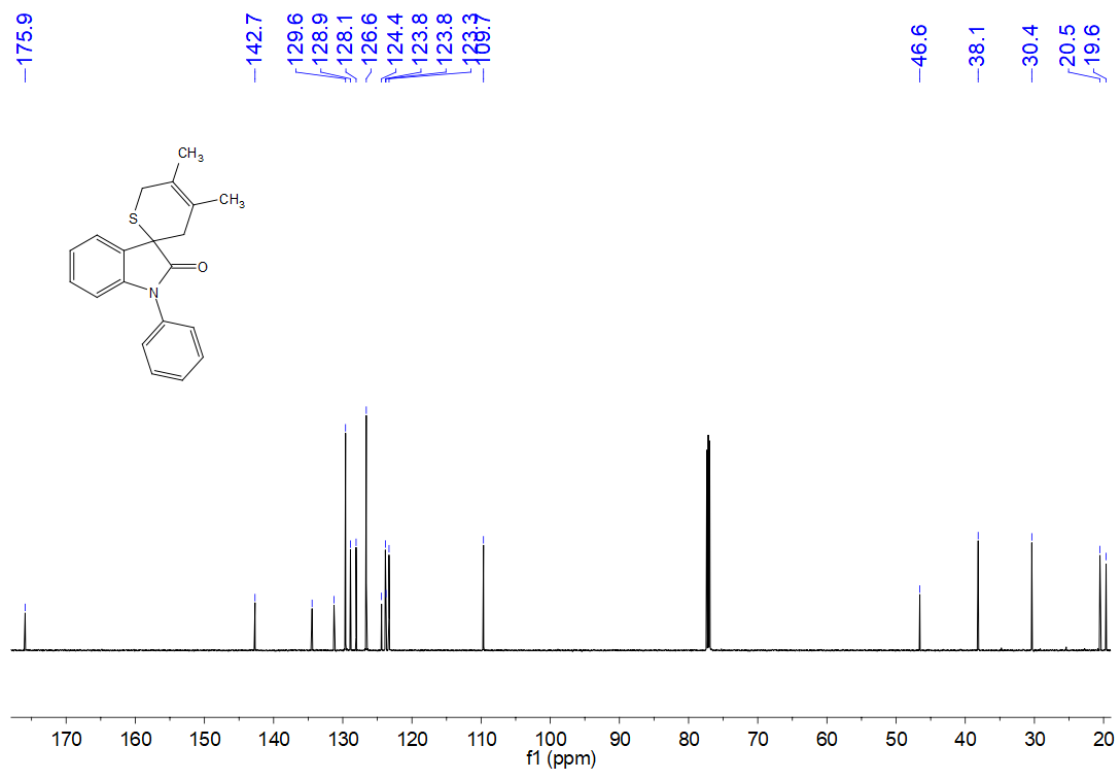

<sup>13</sup>C NMR spectrum of 4wa (151 MHz, CDCl<sub>3</sub>)

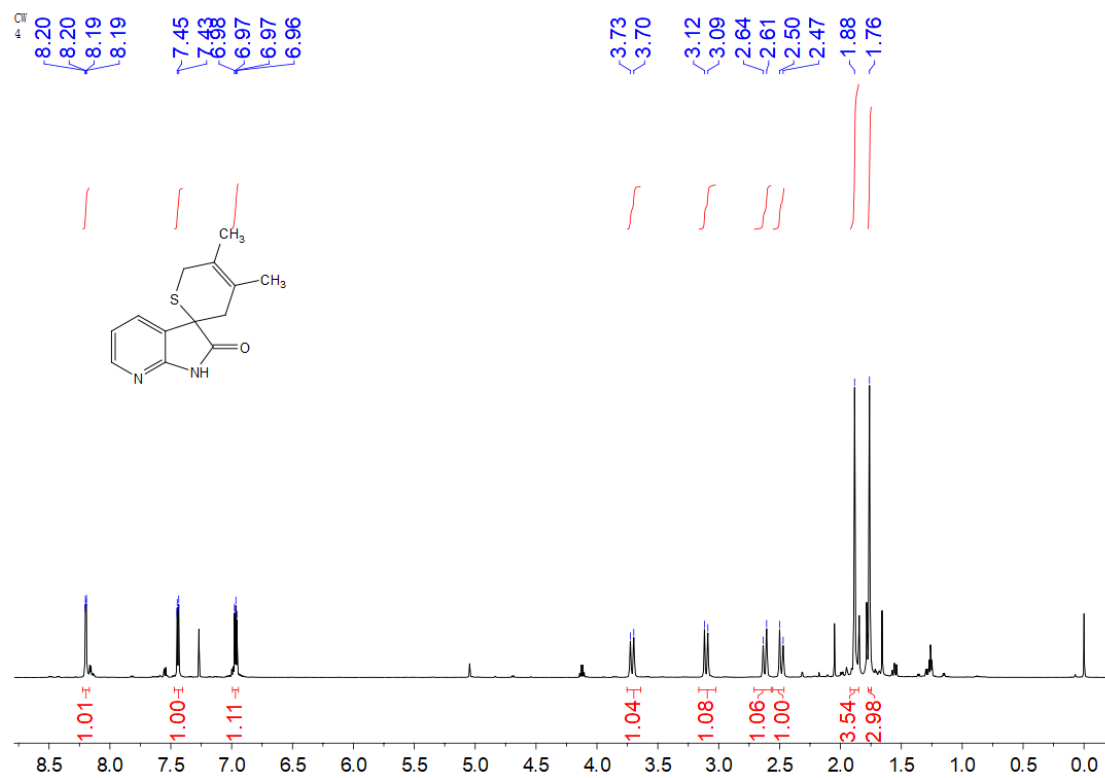

<sup>1</sup>H NMR spectrum of 4d\*a (600 MHz, CDCl<sub>3</sub>)

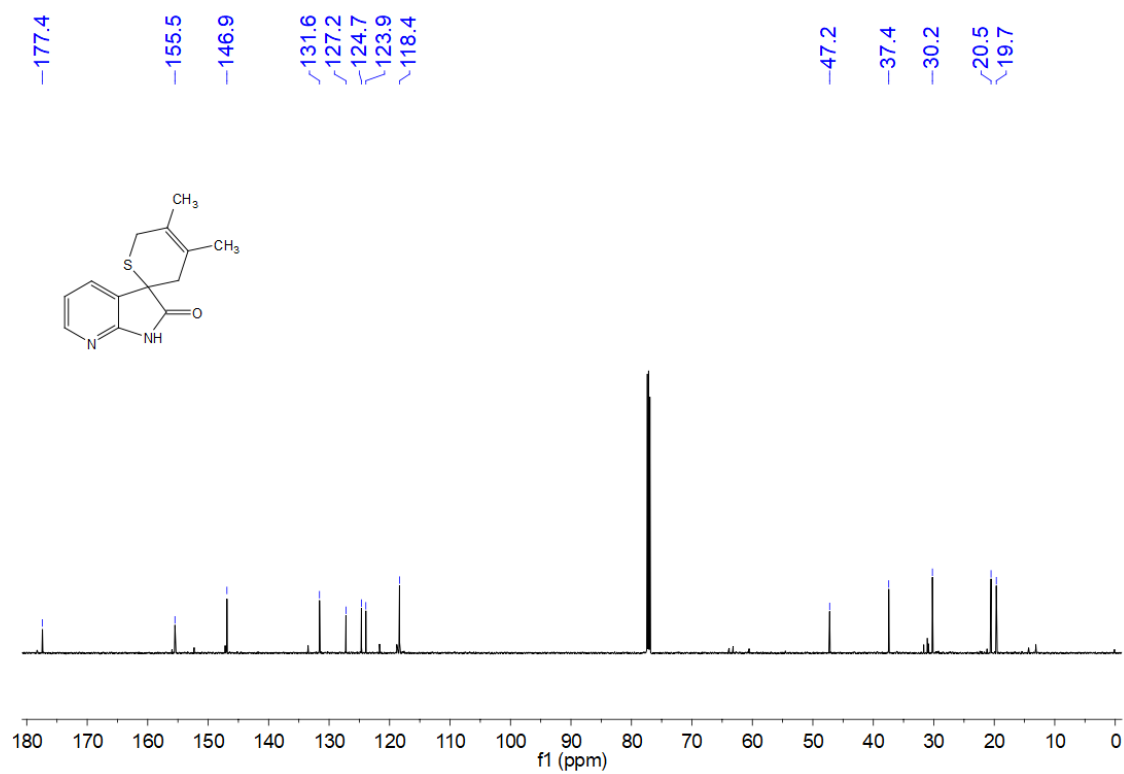

<sup>13</sup>C NMR spectrum of 4d\*a (151 MHz, CDCl<sub>3</sub>)

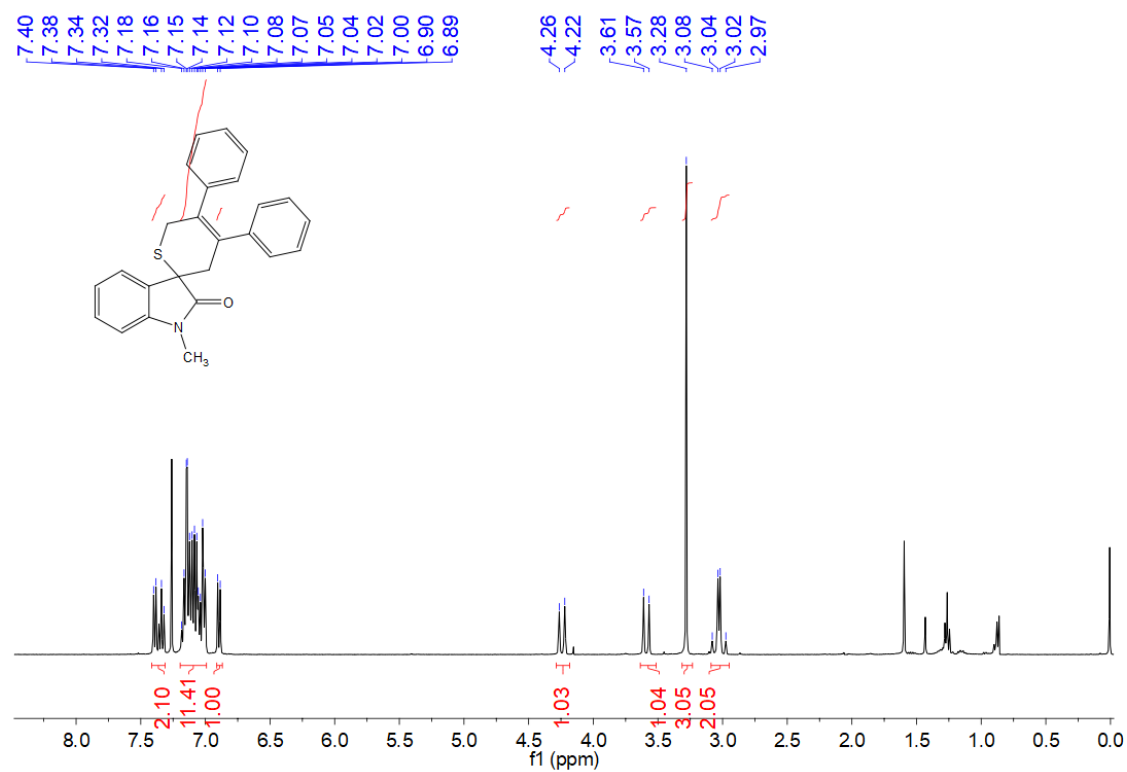

<sup>1</sup>H NMR spectrum of 4pb (400 MHz, CDCl<sub>3</sub>)

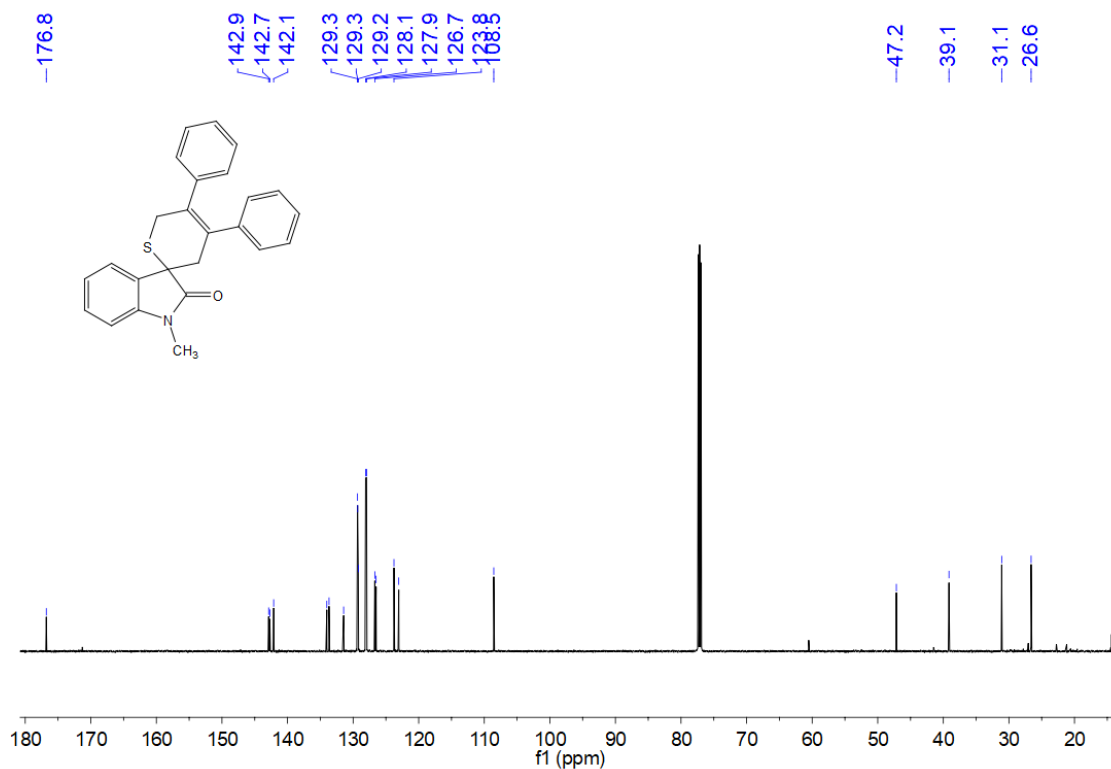

<sup>13</sup>C NMR spectrum of 4pb (151 MHz, CDCl<sub>3</sub>)

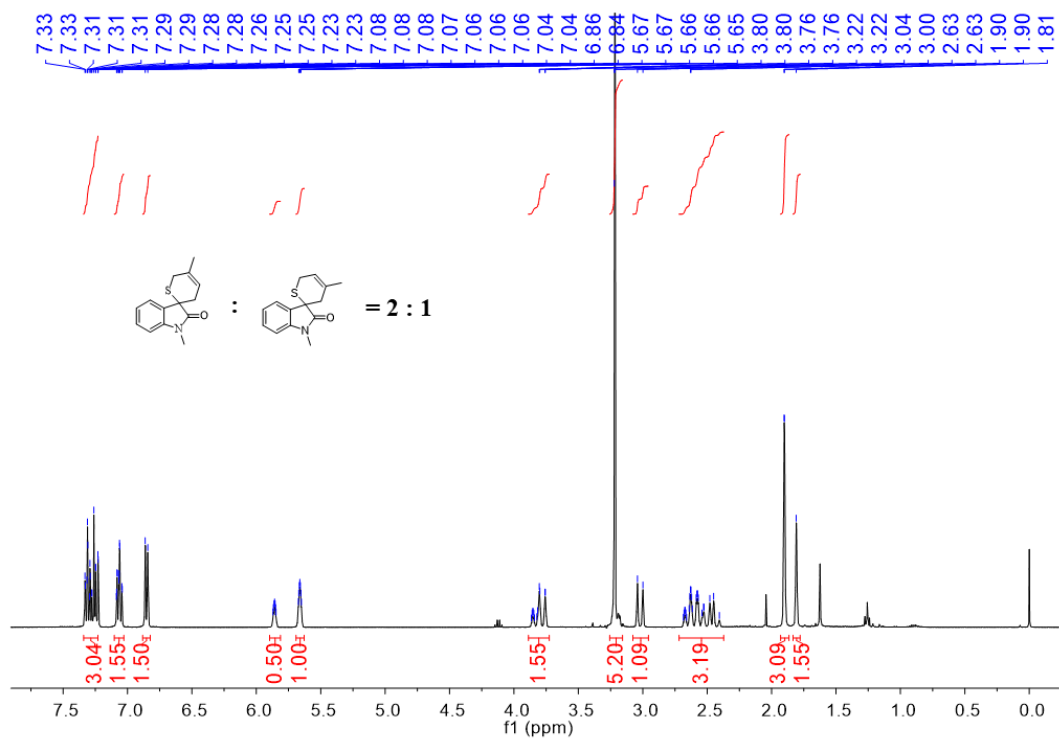

<sup>1</sup>H NMR spectrum of 4pc and 4pc' (400 MHz, CDCl<sub>3</sub>)

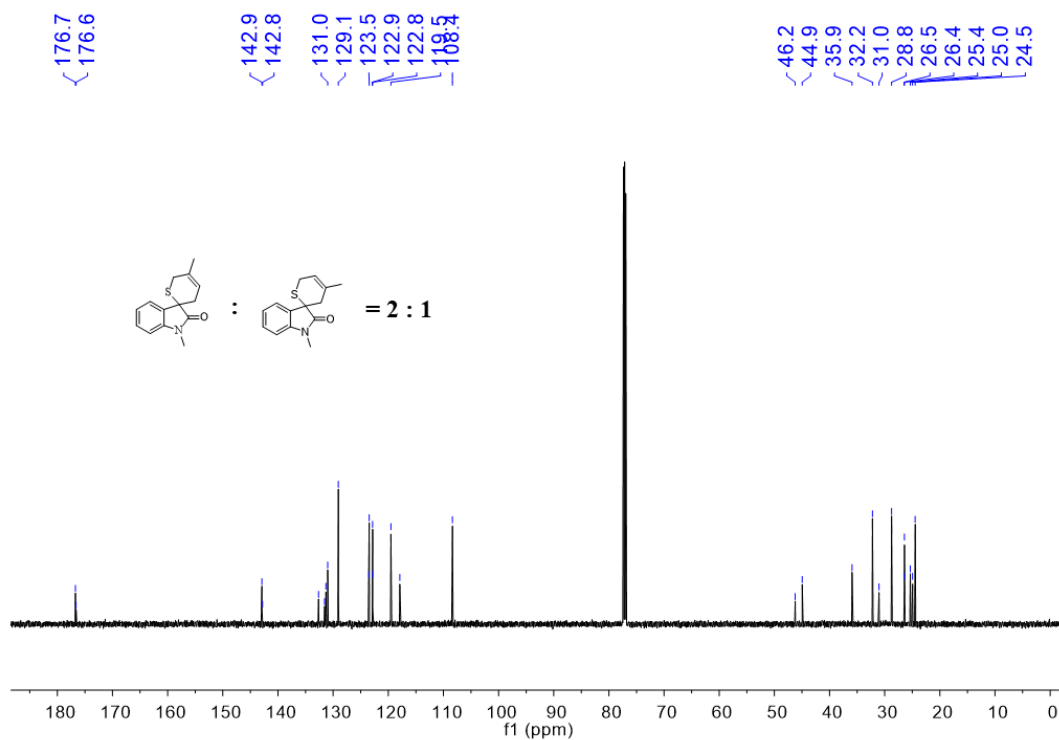

<sup>13</sup>C NMR spectrum of 4pc and 4pc' (151 MHz, CDCl<sub>3</sub>)

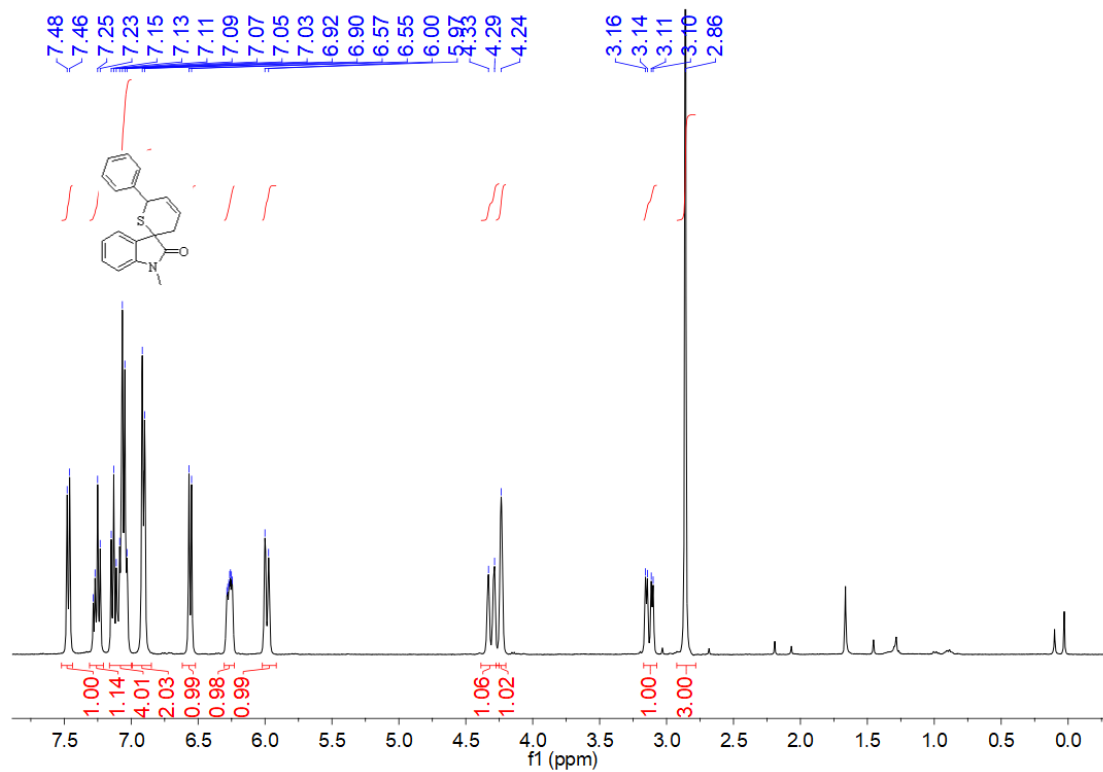

**<sup>1</sup>H NMR spectrum of 4pd (400 MHz, CDCl<sub>3</sub>)**

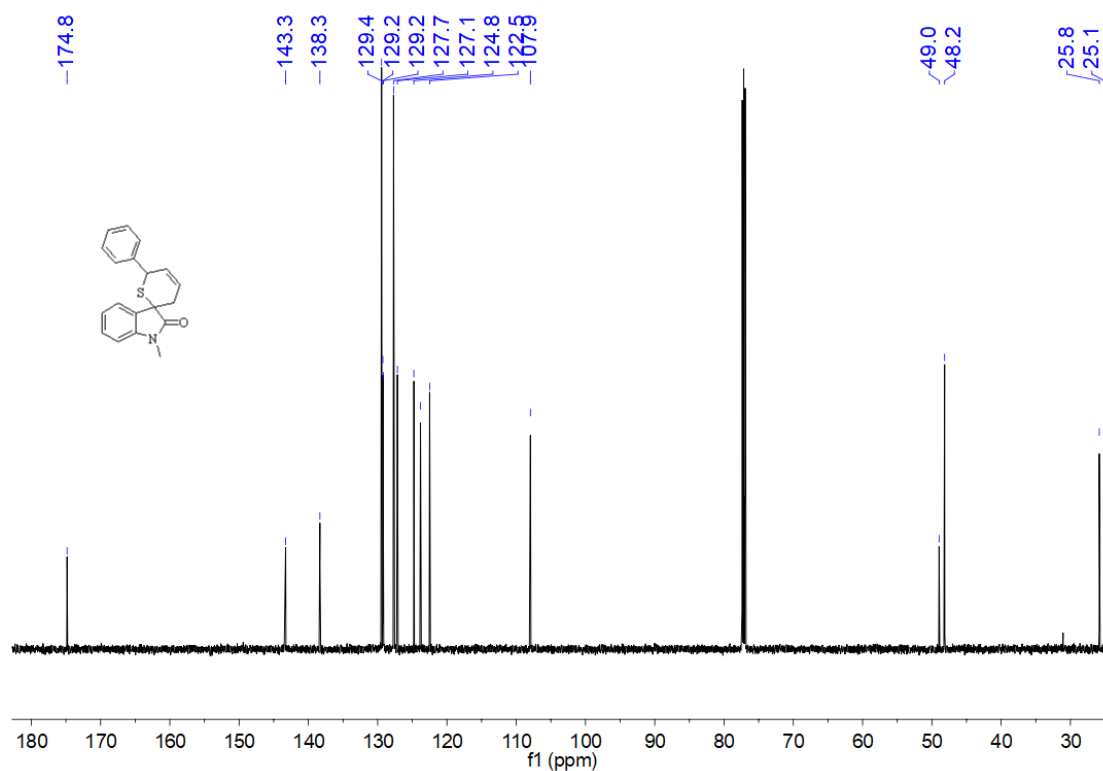

**<sup>13</sup>C NMR spectrum of 4pd (151 MHz, CDCl<sub>3</sub>)**

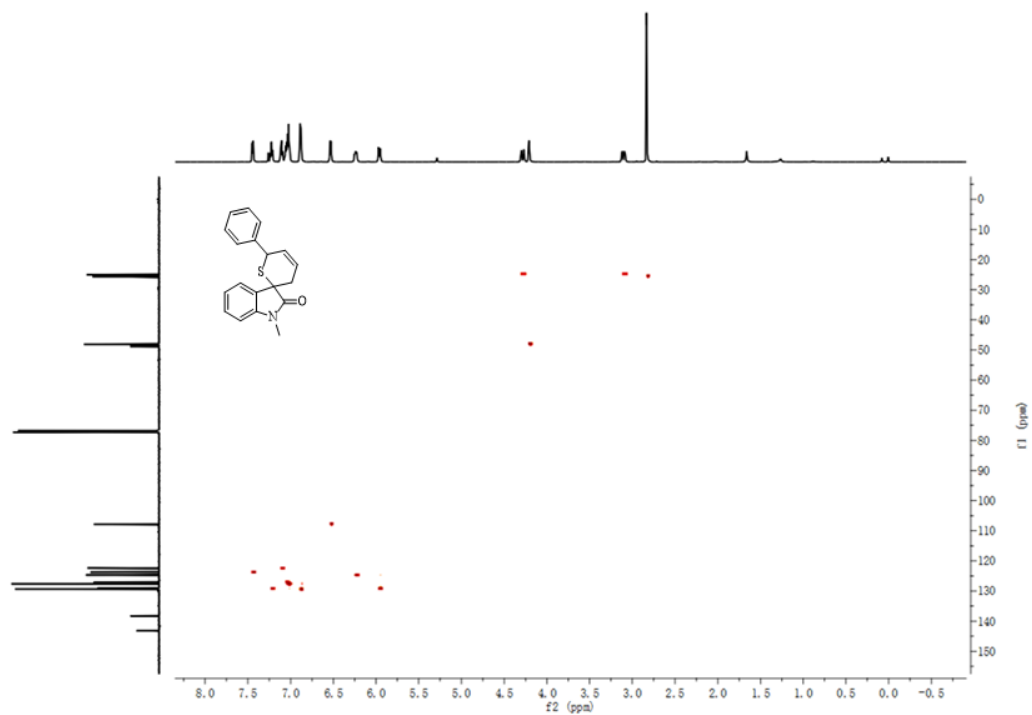

$^1\text{H}$ - $^{13}\text{C}$  HSQC NMR spectrum of 4pd

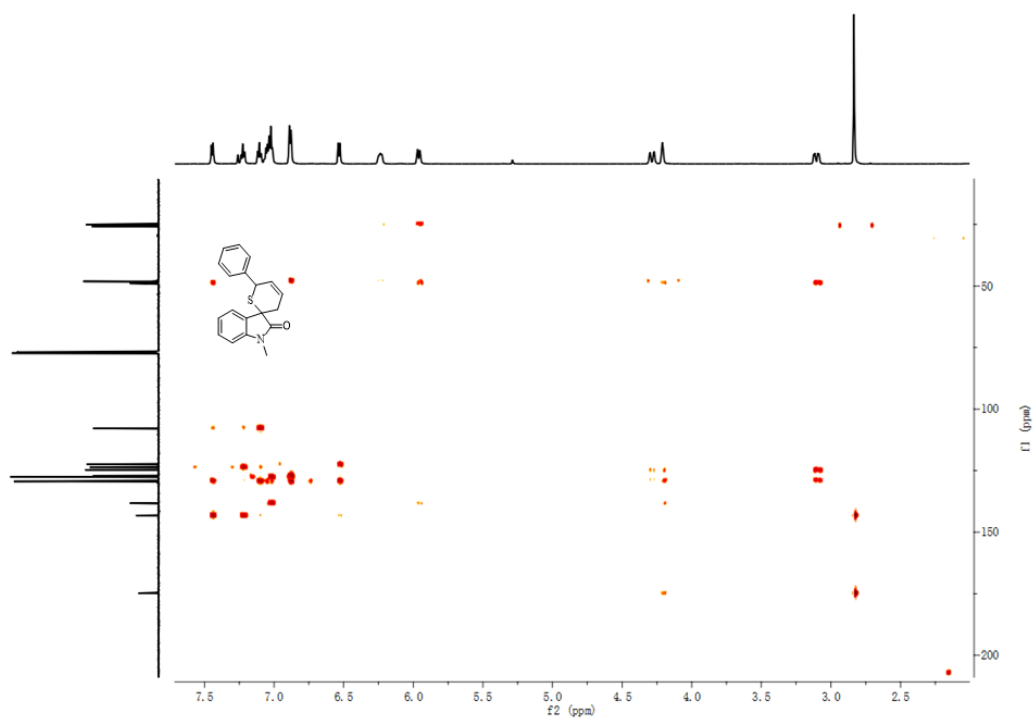

$^1\text{H}$ - $^{13}\text{C}$  HMBC NMR spectrum of 4pd

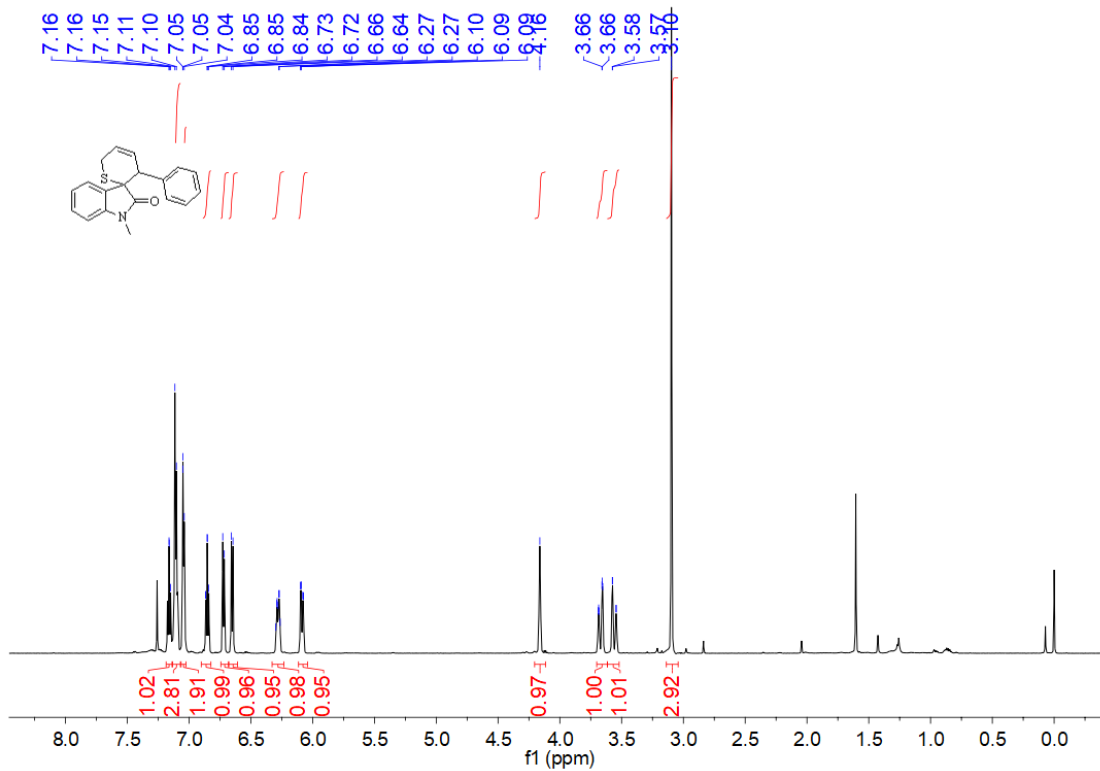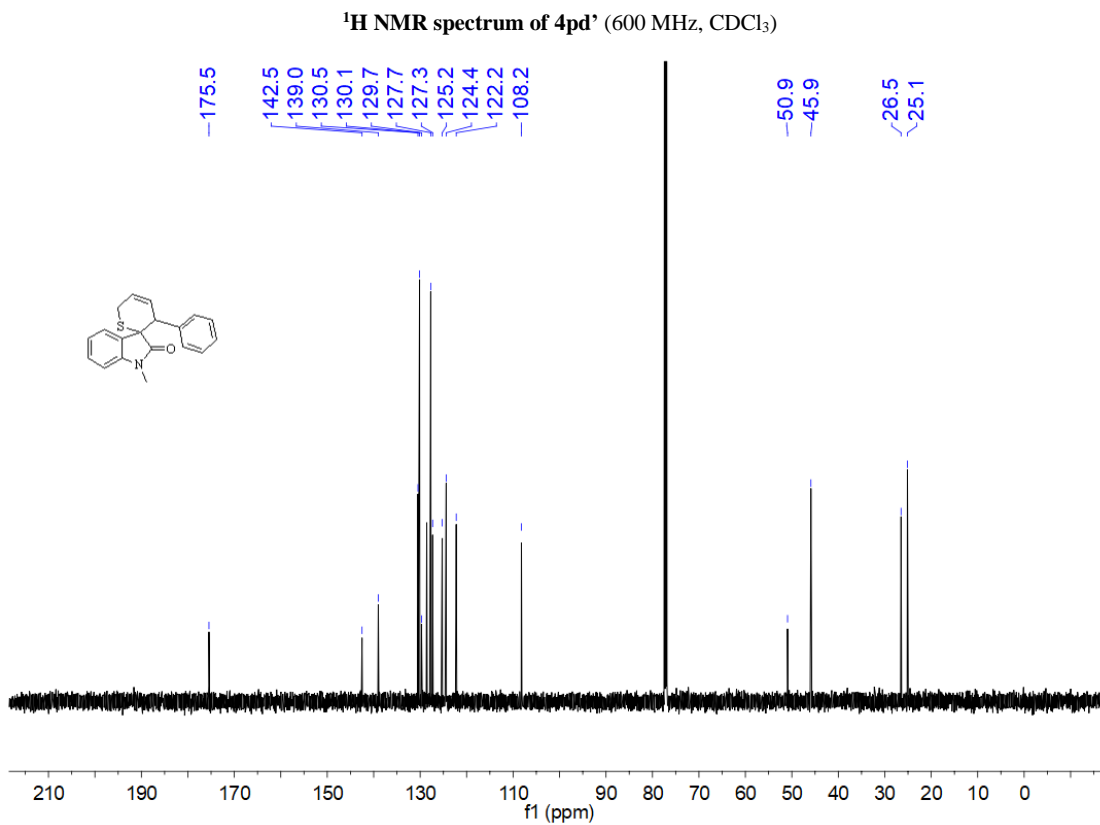

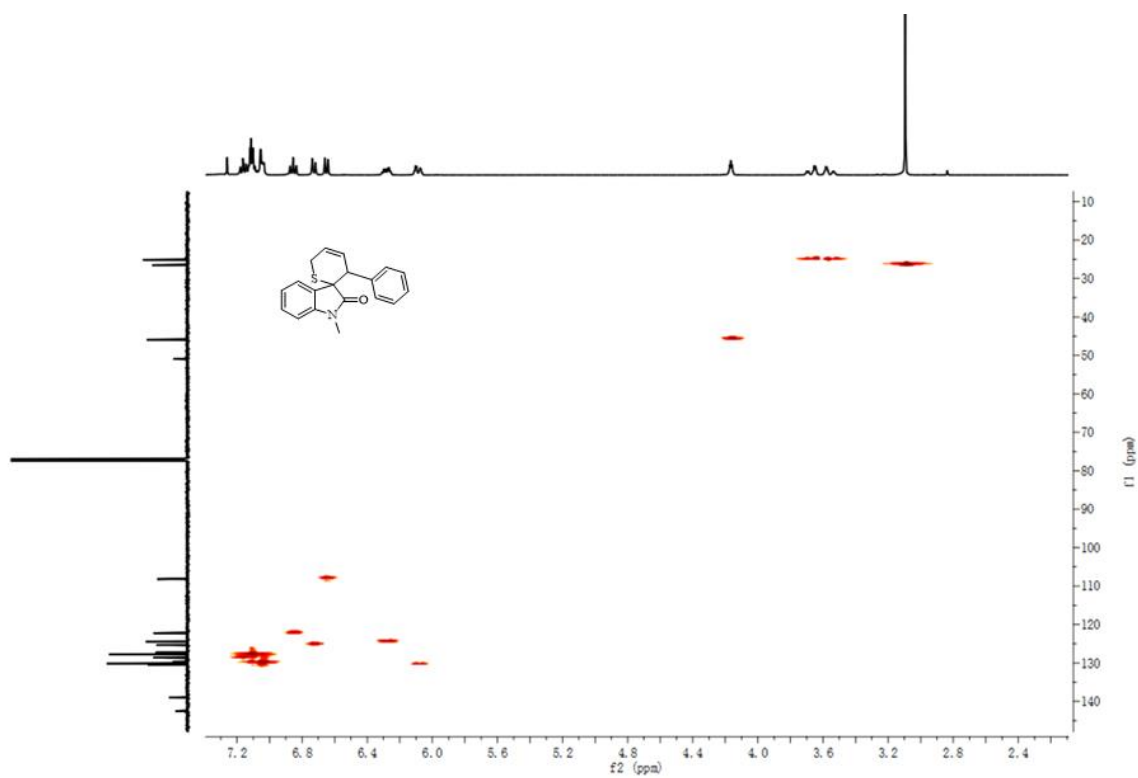

$^1\text{H}$ - $^{13}\text{C}$  HSQC NMR spectrum of 4pd'

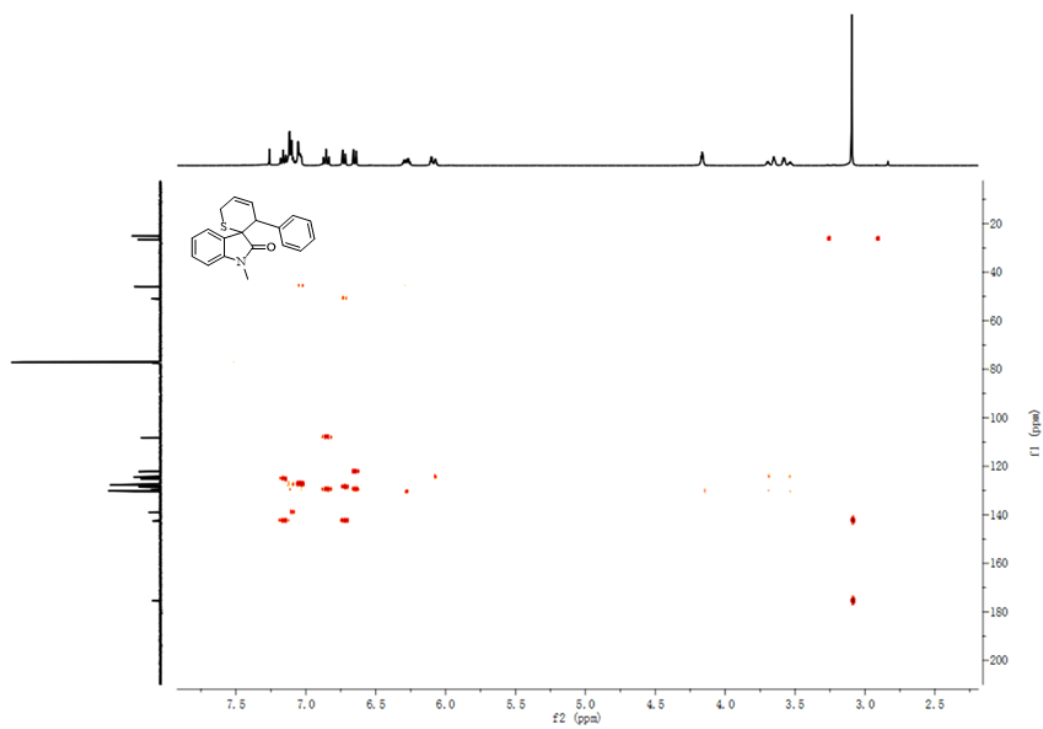

$^1\text{H}$ - $^{13}\text{C}$  HMBC NMR spectrum of 4pd'



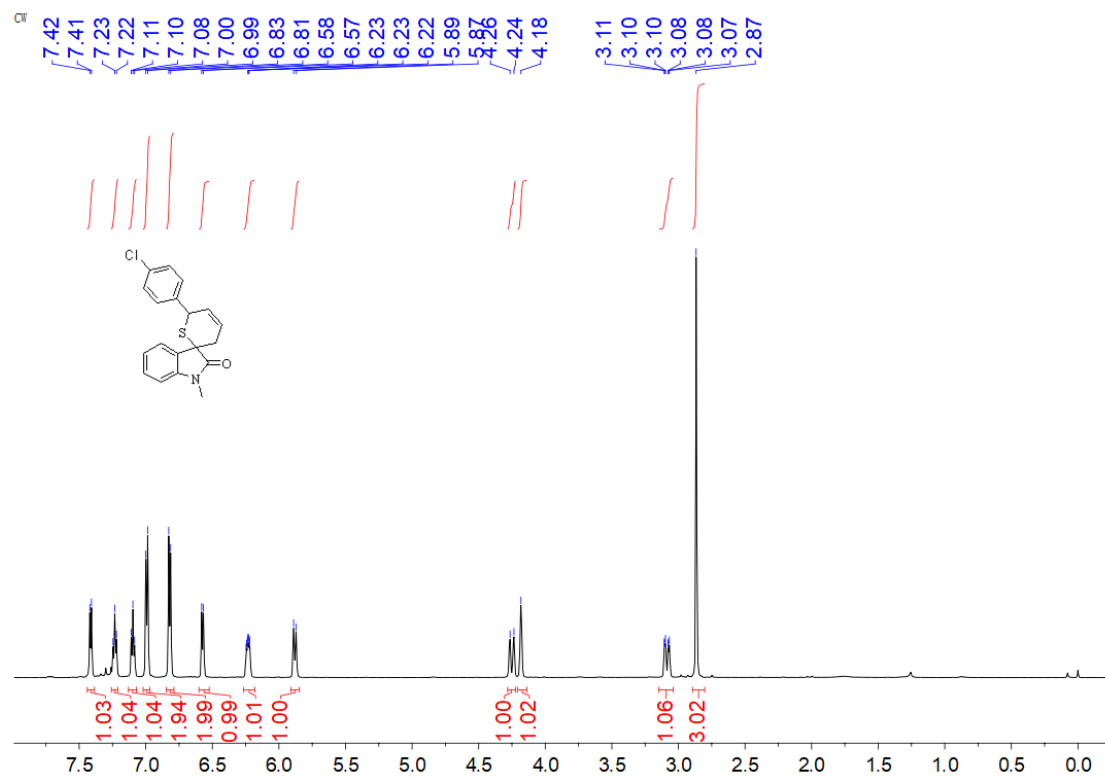

<sup>1</sup>H NMR spectrum of 4pe (600 MHz, CDCl<sub>3</sub>)

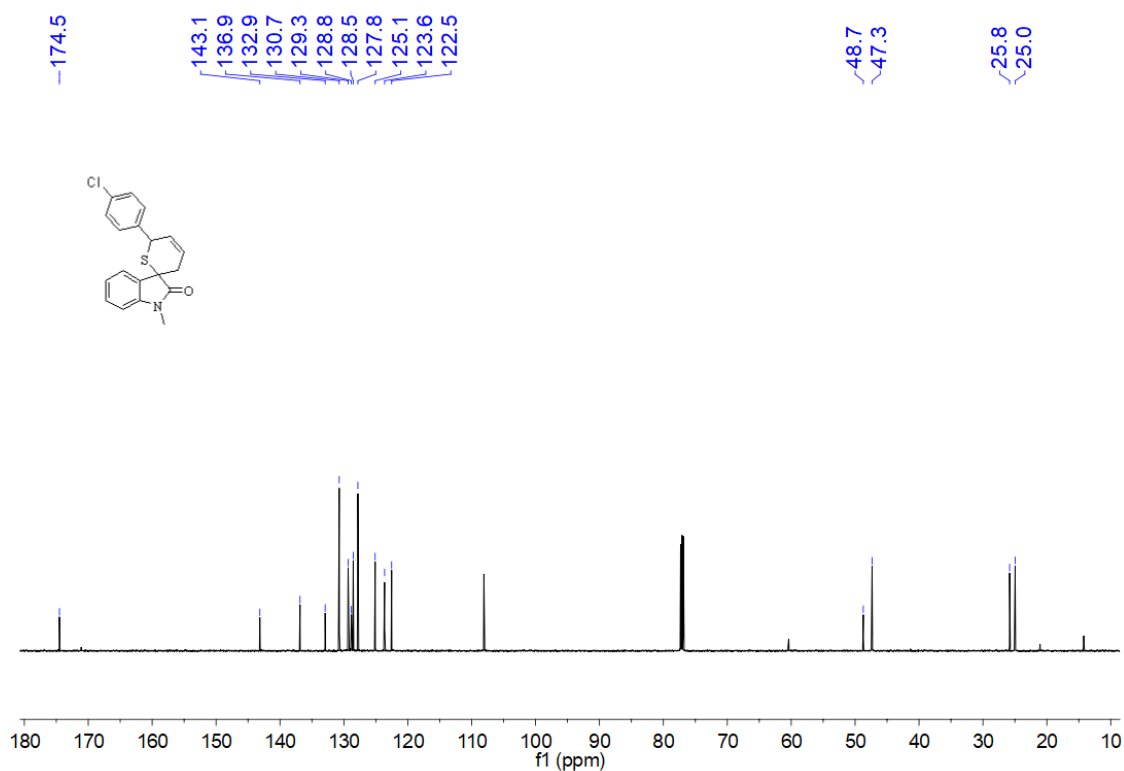

<sup>13</sup>C NMR spectrum of 4pe (151 MHz, CDCl<sub>3</sub>)

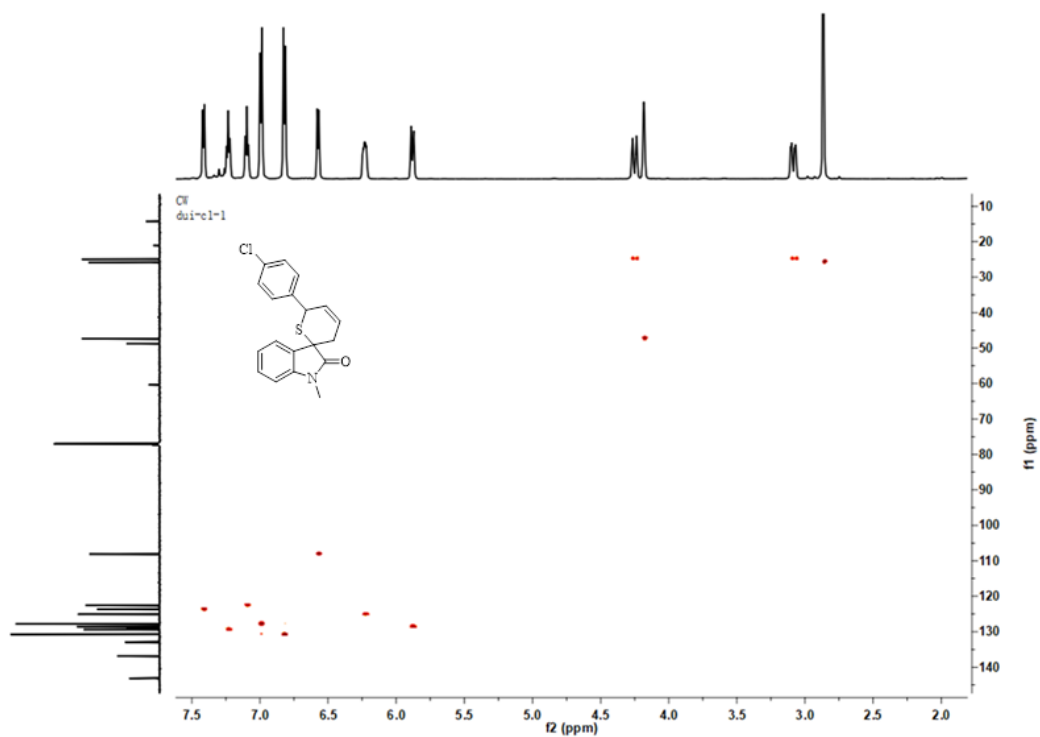

$^1\text{H}$ - $^{13}\text{C}$  HSQC NMR spectrum of 4pe

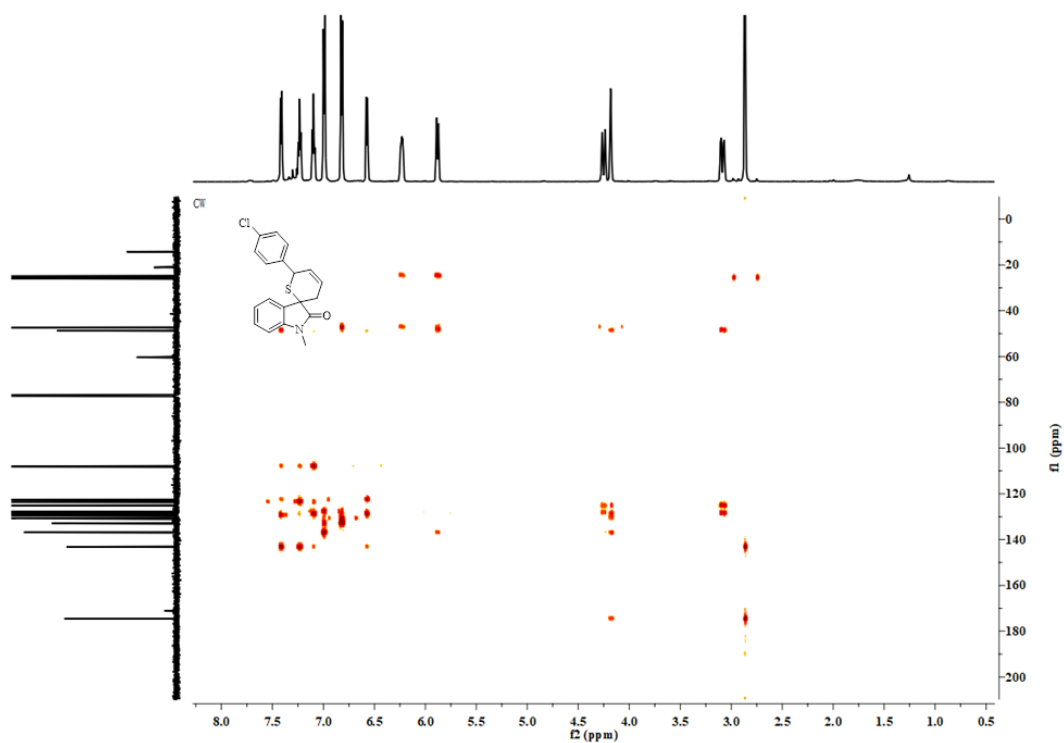

$^1\text{H}$ - $^{13}\text{C}$  HMBC NMR spectrum of 4pe

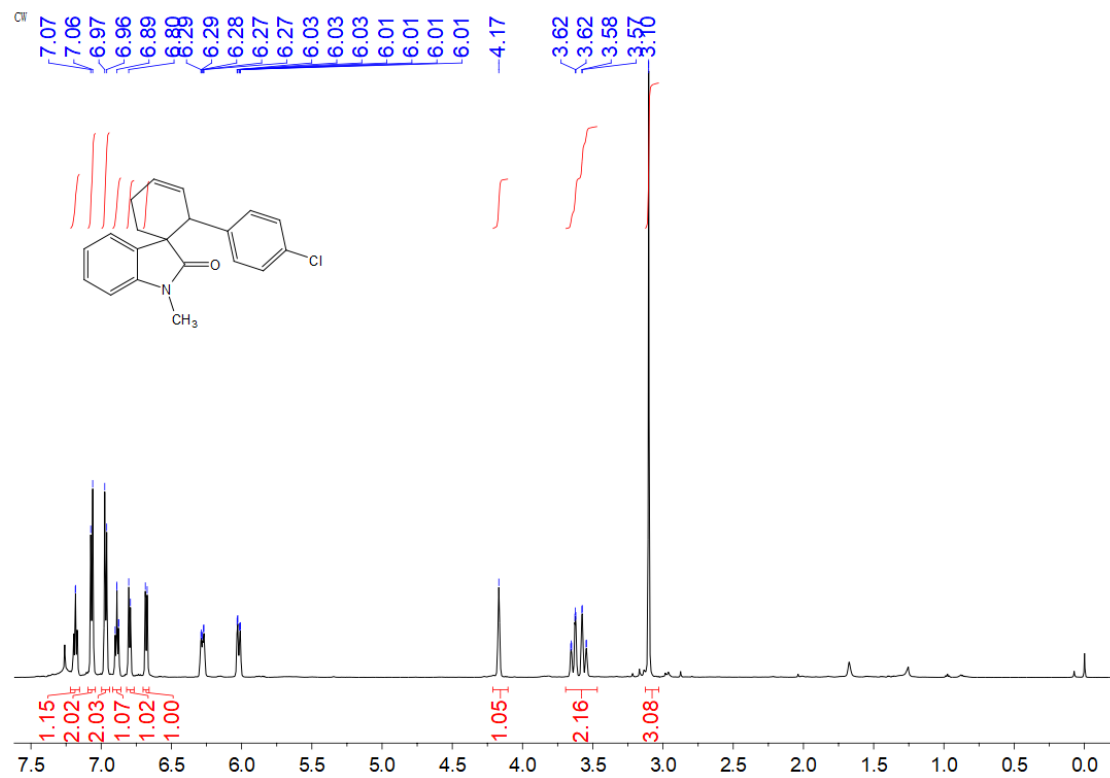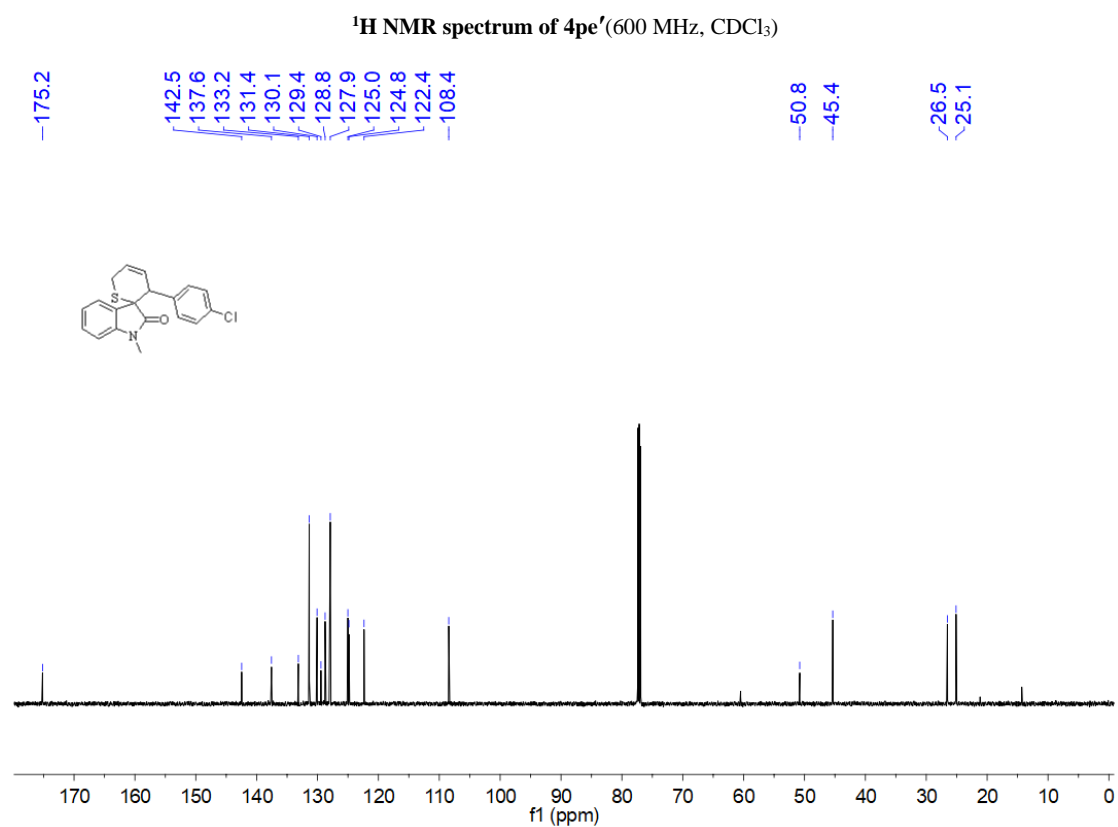

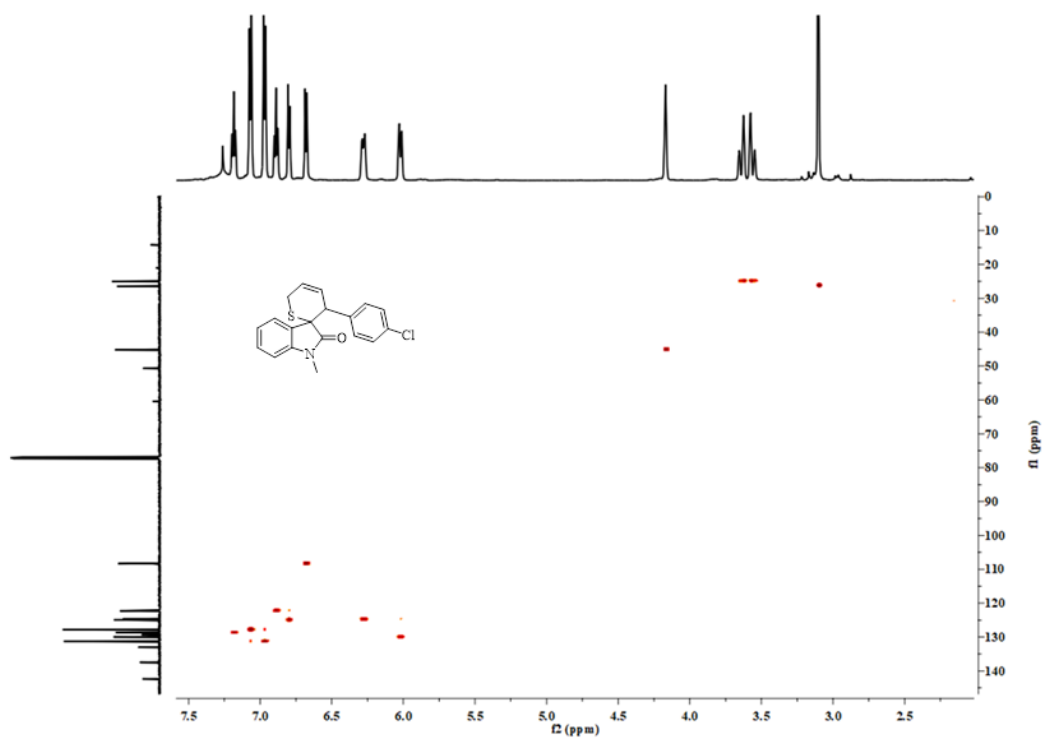

$^1\text{H}$ - $^{13}\text{C}$  HSQC NMR spectrum of 4pe'

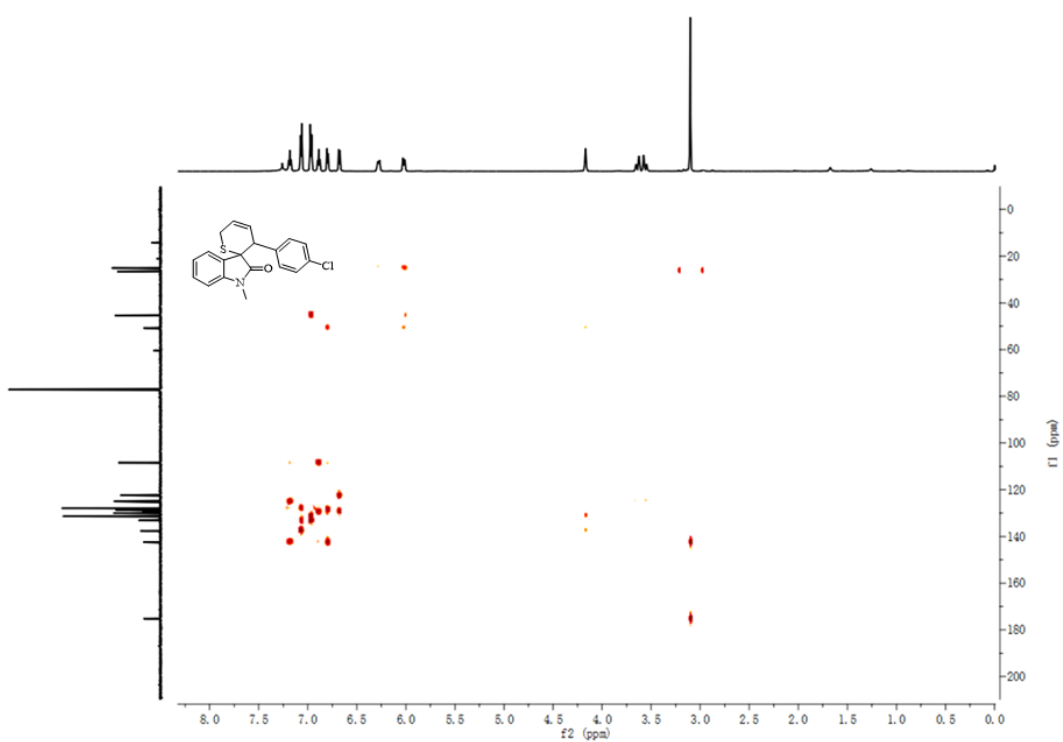

$^1\text{H}$ - $^{13}\text{C}$  HMBC NMR spectrum of 4pe'

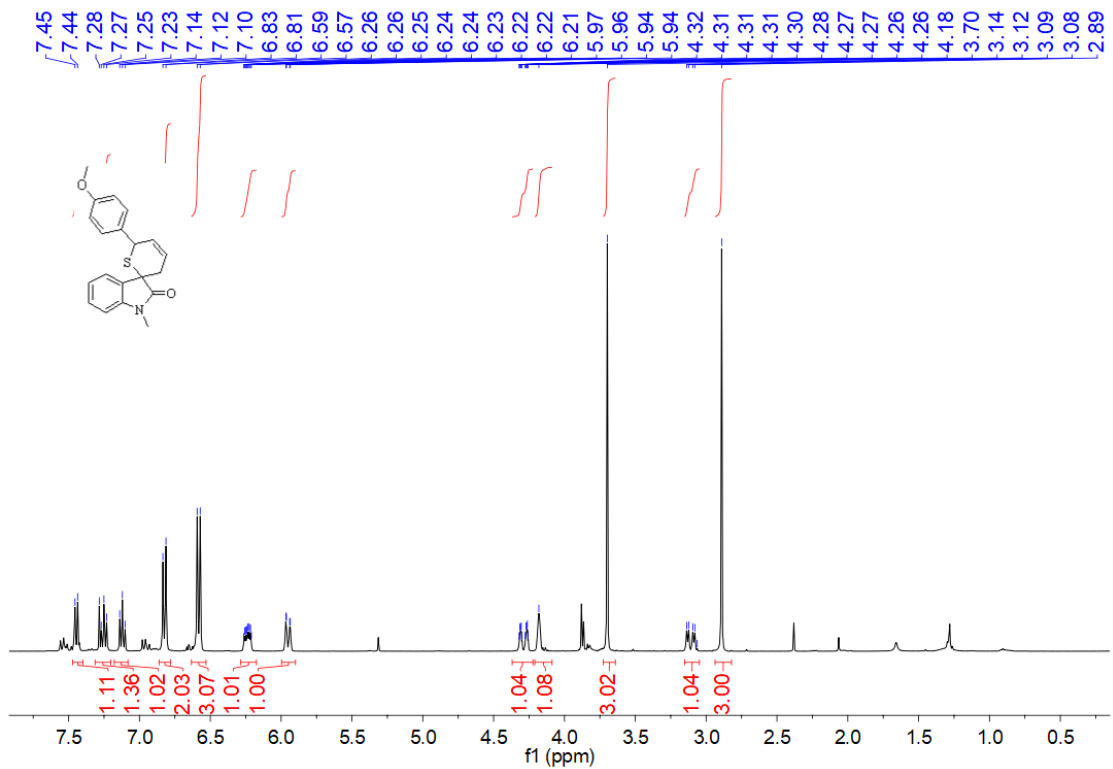

<sup>1</sup>H NMR spectrum of 4pf (400 MHz, CDCl<sub>3</sub>)

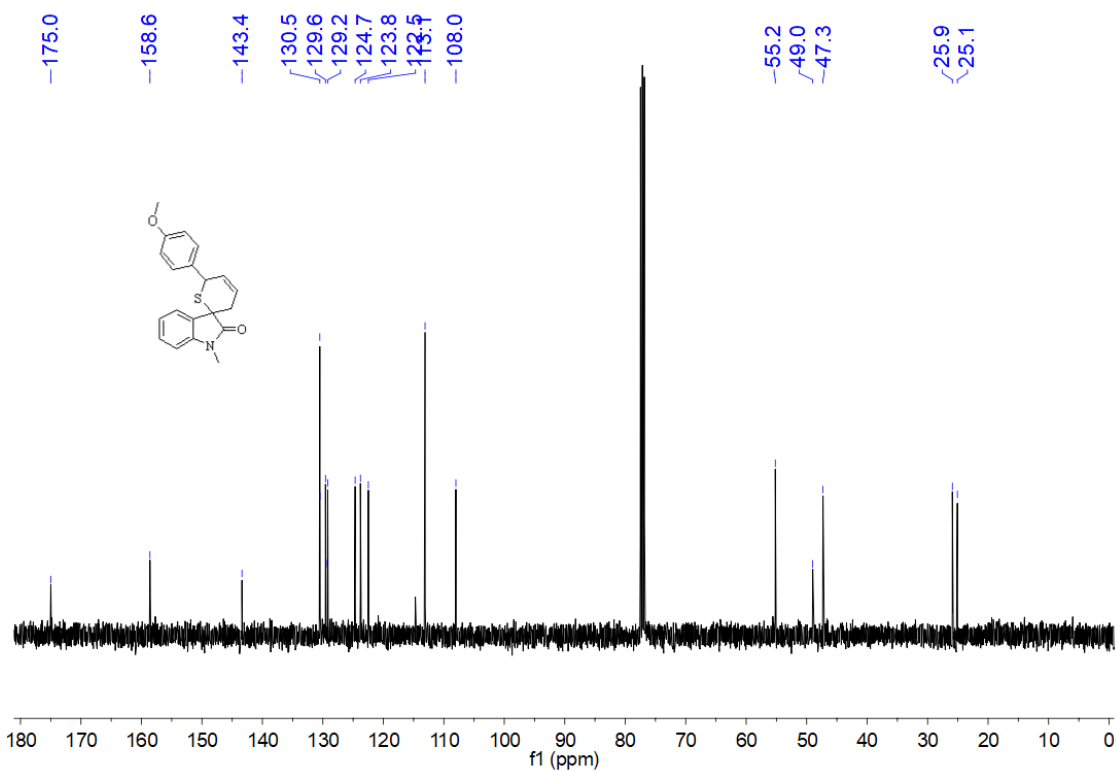

<sup>13</sup>C NMR spectrum of 4pf (101 MHz, CDCl<sub>3</sub>)

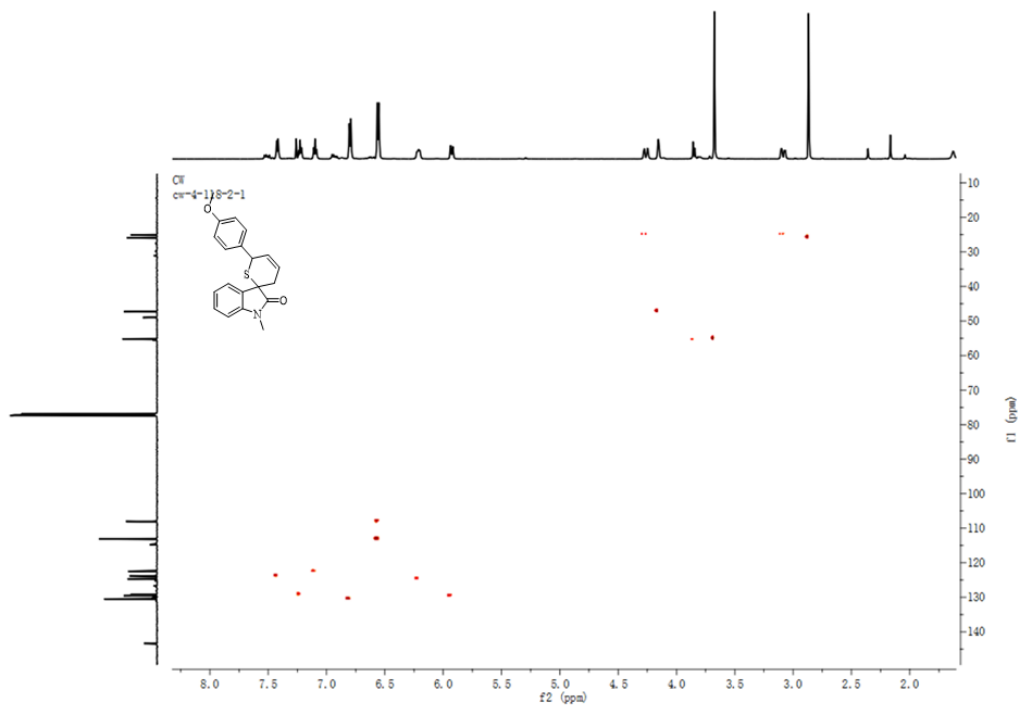

**$^1\text{H}$ - $^{13}\text{C}$  HSQC NMR spectrum of 4pf**

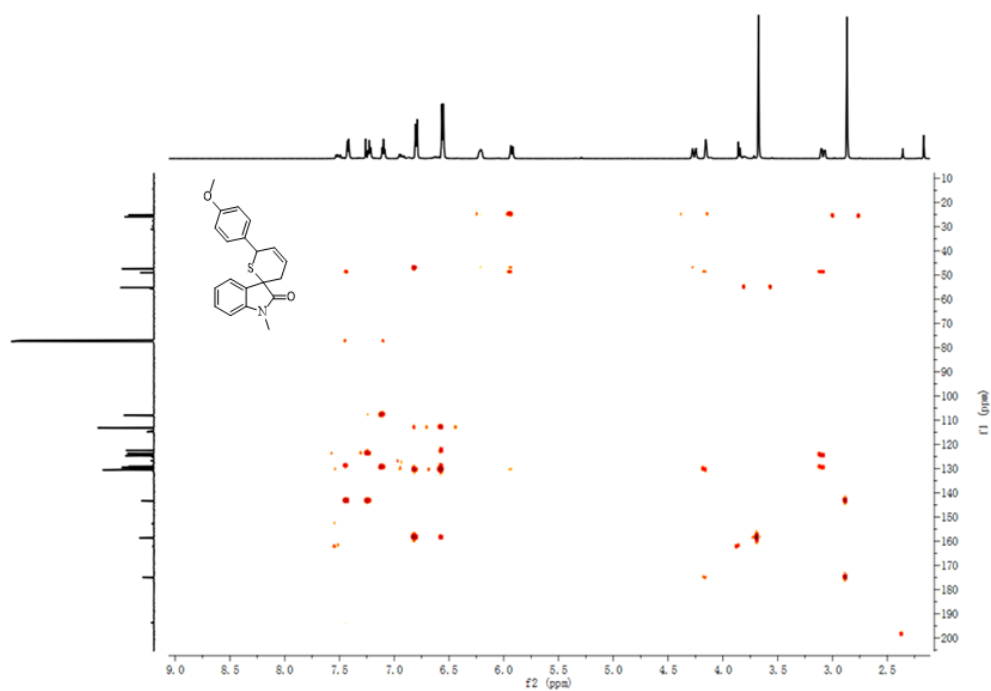

**$^1\text{H}$ - $^{13}\text{C}$  HMBC NMR spectrum of 4pf**

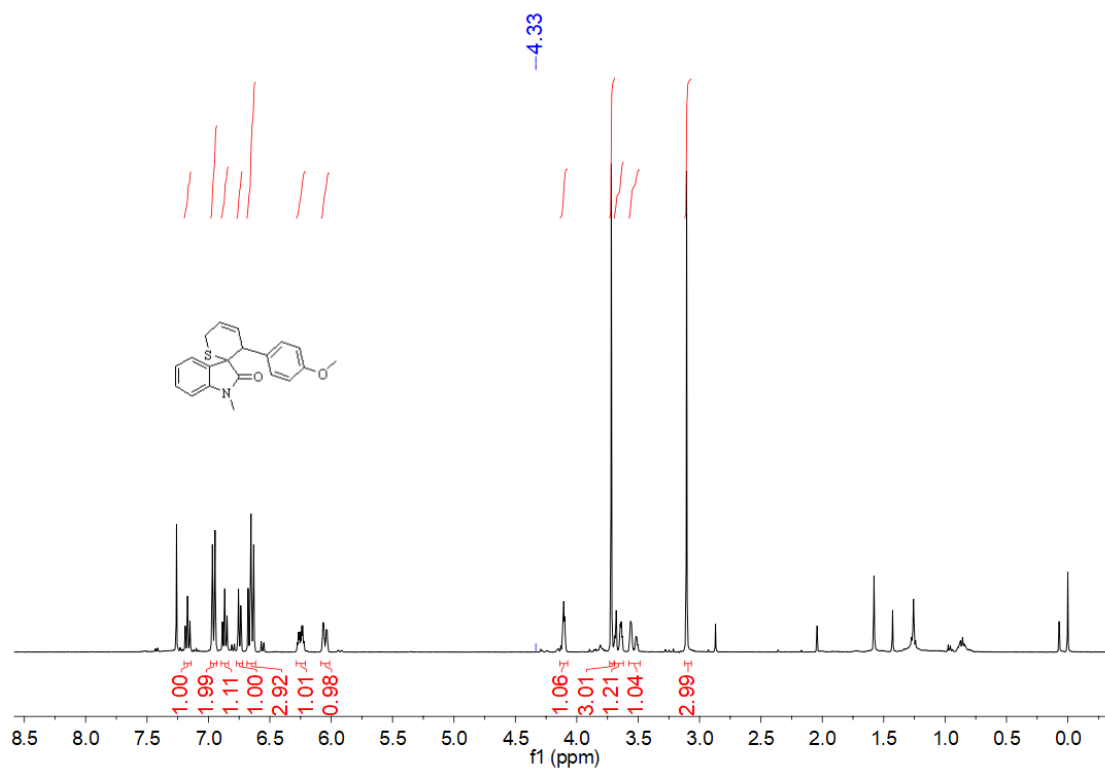

<sup>1</sup>H NMR spectrum of 4pf' (400 MHz, CDCl<sub>3</sub>)

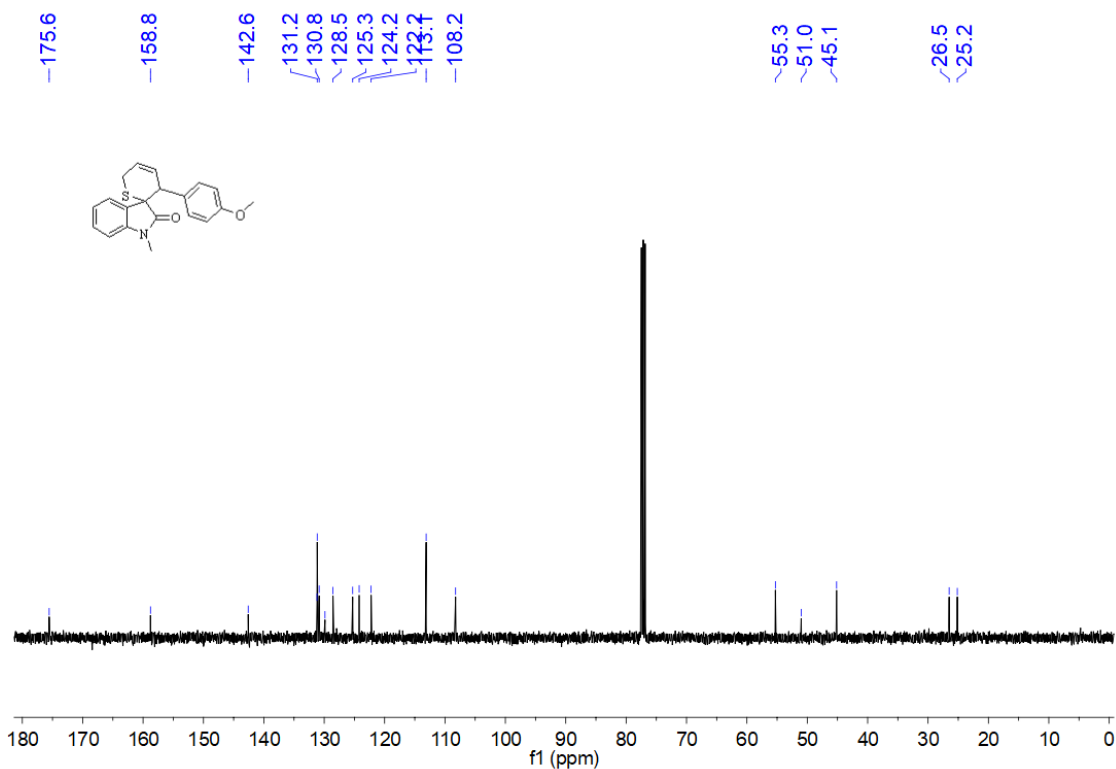

<sup>13</sup>C NMR spectrum of 4pf' (101 MHz, CDCl<sub>3</sub>)

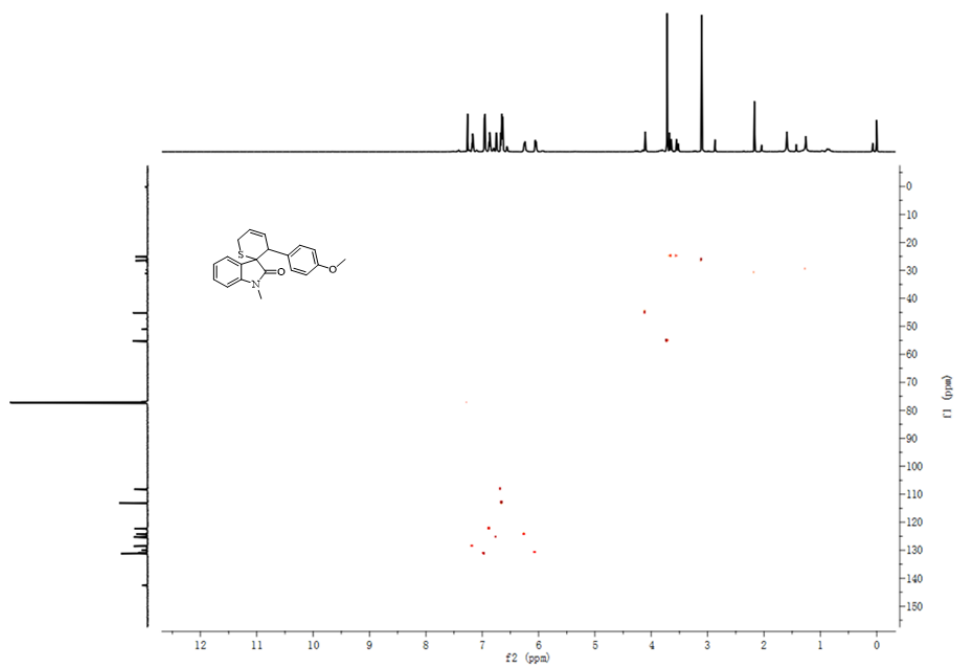

$^1\text{H}$ - $^{13}\text{C}$  HSQC NMR spectrum of 4pf'

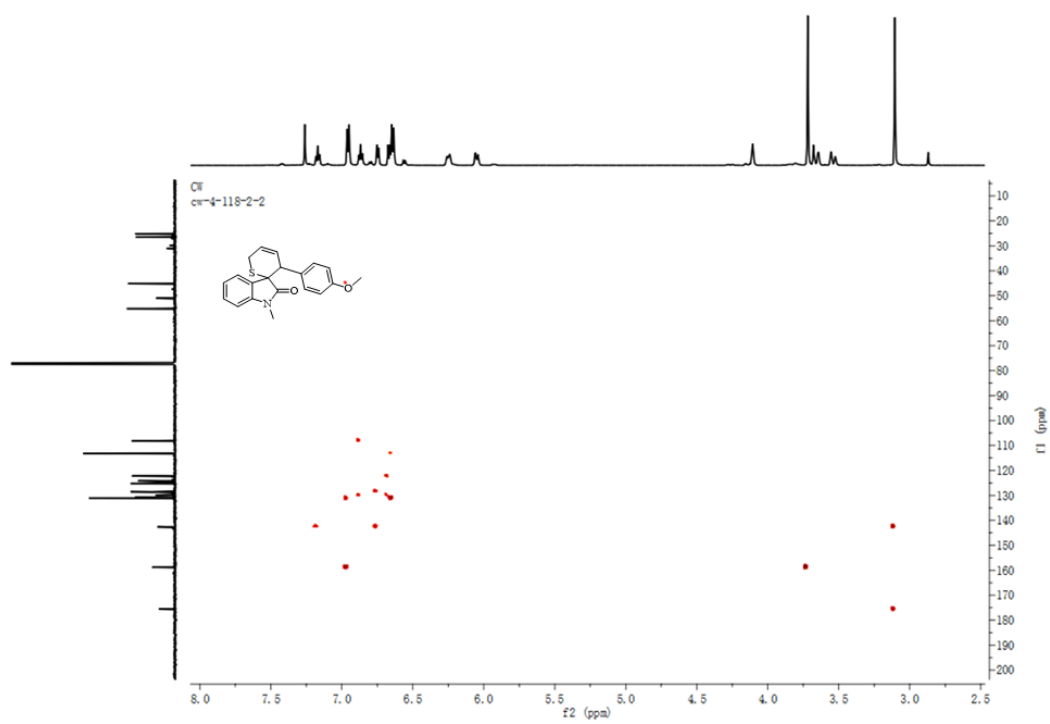

$^1\text{H}$ - $^{13}\text{C}$  HMBC NMR spectrum of 4pf'



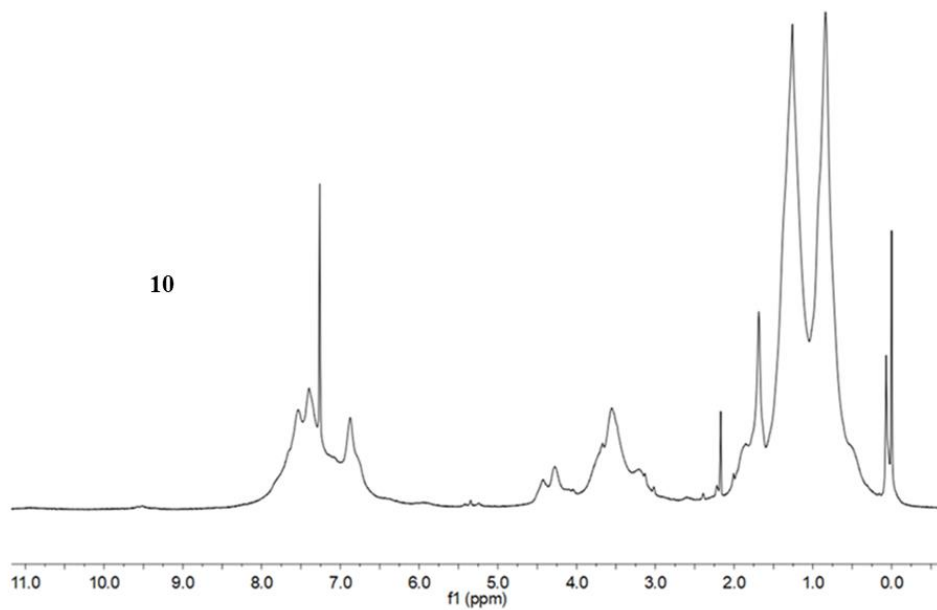

**<sup>1</sup>H NMR spectrum of polymer 9 (600 MHz, CDCl<sub>3</sub>)**

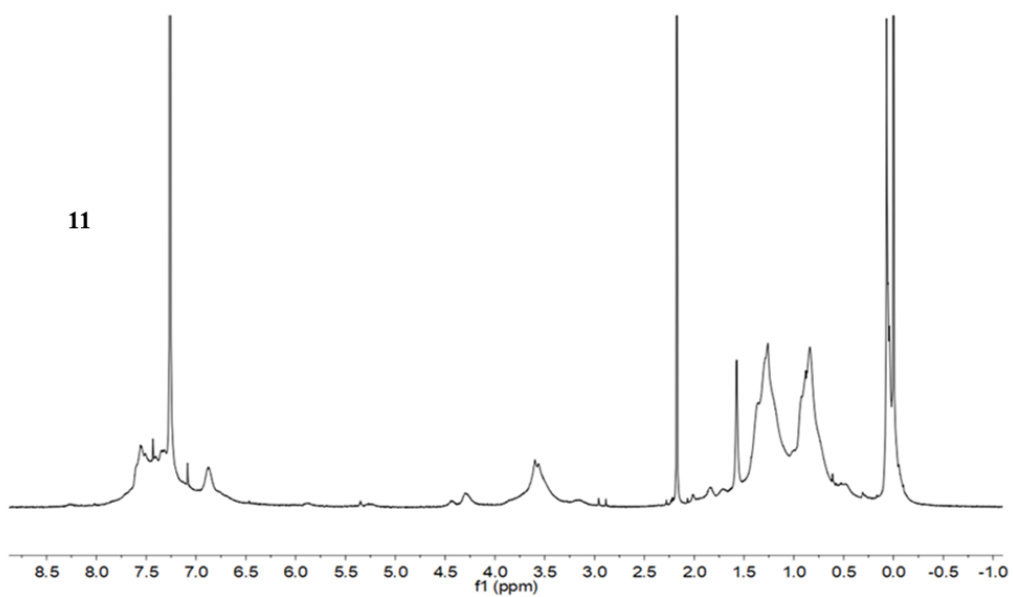

**<sup>1</sup>H NMR spectrum of polymer 10 (600 MHz, CDCl<sub>3</sub>)**

## 12. Cartesian coordinates of intermediates

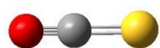

|   |          |          |         |
|---|----------|----------|---------|
| C | -0.32862 | 0.05495  | 0.41235 |
| O | -1.04497 | 0.17393  | 1.31134 |
| S | 0.64572  | -0.10757 | -0.8103 |

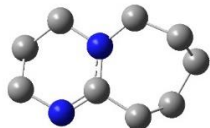

|   |          |          |          |
|---|----------|----------|----------|
| C | 2.29726  | 0.66638  | 0.75783  |
| C | 2.58187  | -0.71547 | 0.17789  |
| N | 1.35805  | -1.48641 | -0.00943 |
| C | 0.3206   | -0.82172 | -0.39274 |
| N | 0.2847   | 0.52955  | -0.64405 |
| C | 1.36655  | 1.40736  | -0.18838 |
| C | -0.97471 | -1.57669 | -0.61141 |
| C | -2.14141 | -1.16887 | 0.33316  |
| C | -1.93003 | 0.12886  | 1.12129  |
| C | -1.87923 | 1.38537  | 0.24864  |
| C | -0.97334 | 1.19009  | -0.97343 |
| H | 3.21632  | 1.24085  | 0.90006  |
| H | 1.81691  | 0.54799  | 1.73582  |
| H | 3.10403  | -0.60115 | -0.78452 |
| H | 3.2522   | -1.27944 | 0.83439  |
| H | 0.91967  | 2.27335  | 0.31316  |
| H | 1.92307  | 1.78241  | -1.05714 |
| H | -0.73189 | -2.63121 | -0.47434 |
| H | -1.27572 | -1.4557  | -1.65694 |
| H | -3.06514 | -1.08736 | -0.25097 |
| H | -2.30025 | -1.97773 | 1.05231  |
| H | -2.73228 | 0.23281  | 1.85914  |
| H | -0.99708 | 0.04814  | 1.69303  |
| H | -1.52507 | 2.23133  | 0.84885  |
| H | -2.88355 | 1.64364  | -0.10728 |
| H | -0.73018 | 2.15242  | -1.43361 |
| H | -1.49569 | 0.60589  | -1.73473 |

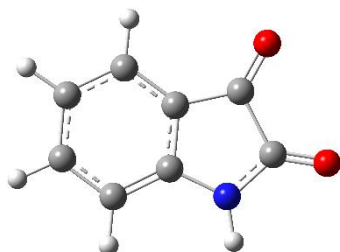

**Isatin**

|   |          |          |          |
|---|----------|----------|----------|
| H | -1.26654 | 2.48351  | -0.00017 |
| H | -1.72417 | -2.50598 | 0.00019  |
| H | -3.73321 | -1.04428 | 0.00002  |
| H | -3.53296 | 1.41355  | -0.0001  |
| O | 3.08451  | -0.69356 | -0.00023 |

|   |          |          |          |
|---|----------|----------|----------|
| O | 1.76695  | 1.9426   | 0.00025  |
| C | 1.178    | 0.88924  | 0.00002  |
| C | 1.89075  | -0.502   | -0.00009 |
| C | -1.37947 | 1.4037   | -0.00013 |
| C | -0.25838 | 0.58312  | -0.00002 |
| C | -0.3816  | -0.81568 | 0.00004  |
| C | -1.62555 | -1.42603 | 0.00007  |
| C | -2.7467  | -0.59104 | 0.0000   |
| C | -2.63692 | 0.80309  | -0.00009 |
| N | 0.88177  | -1.42548 | 0.0001   |
| H | 1.03205  | -2.42723 | 0.0004   |

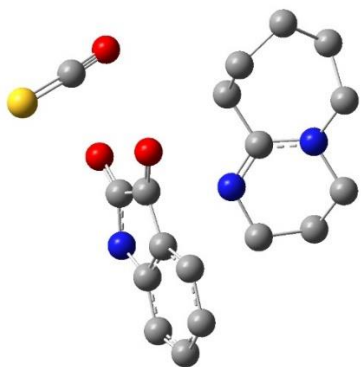

### INT1

|   |          |          |          |
|---|----------|----------|----------|
| C | -2.298   | -2.77491 | 1.25324  |
| C | -0.87946 | -2.299   | 0.98093  |
| N | -0.78946 | -0.84796 | 0.87806  |
| C | -1.82386 | -0.16595 | 0.51135  |
| N | -3.06783 | -0.69193 | 0.22089  |
| C | -3.21405 | -2.14848 | 0.21854  |
| C | -1.6337  | 1.33819  | 0.46697  |
| C | -1.99681 | 1.98625  | -0.87533 |
| C | -3.45806 | 2.43797  | -0.9253  |
| C | -4.40052 | 1.42323  | -0.27135 |
| C | -4.07811 | -0.02956 | -0.61645 |
| C | 1.94045  | -3.31409 | -1.97971 |
| C | 2.43096  | -3.92848 | -0.82315 |
| C | 2.59311  | -3.22966 | 0.37641  |
| C | 2.24376  | -1.88785 | 0.38226  |
| C | 1.75563  | -1.26003 | -0.77408 |
| C | 1.59924  | -1.96156 | -1.96092 |
| C | 1.82373  | 0.24915  | 1.09525  |
| C | 1.46791  | 0.1377   | -0.41671 |
| O | 1.75527  | 1.24703  | 1.77906  |
| C | 1.78982  | 3.59818  | 0.1285   |
| O | 0.67668  | 3.72635  | 0.40615  |
| H | -2.36809 | -3.86493 | 1.20467  |
| H | -2.61058 | -2.45938 | 2.25492  |
| H | -0.19896 | -2.62486 | 1.7771   |
| H | -0.50663 | -2.75564 | 0.05168  |
| H | -4.26154 | -2.37884 | 0.43701  |
| H | -2.9901  | -2.55301 | -0.7805  |

|   |          |          |          |
|---|----------|----------|----------|
| H | -2.21899 | 1.79857  | 1.273    |
| H | -0.5826  | 1.50925  | 0.698    |
| H | -1.33315 | 2.8379   | -1.0506  |
| H | -1.7938  | 1.27363  | -1.68361 |
| H | -3.75684 | 2.59863  | -1.96748 |
| H | -3.56482 | 3.40172  | -0.41402 |
| H | -4.39497 | 1.52864  | 0.81869  |
| H | -5.42704 | 1.62319  | -0.59452 |
| H | -4.98729 | -0.6221  | -0.48316 |
| H | -3.80572 | -0.11211 | -1.68076 |
| H | 1.82837  | -3.89207 | -2.89039 |
| H | 2.69353  | -4.98153 | -0.85337 |
| H | 2.96858  | -3.71757 | 1.26948  |
| H | 1.21426  | -1.46239 | -2.8451  |
| N | 2.28798  | -0.98768 | 1.45372  |
| H | 2.58025  | -1.2299  | 2.39223  |
| O | 1.10422  | 1.06854  | -1.09735 |
| S | 3.31498  | 3.52587  | -0.25796 |

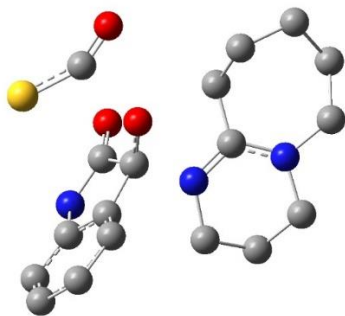

### TS1-2

|   |          |          |          |
|---|----------|----------|----------|
| C | -1.27444 | -3.17953 | 0.72247  |
| C | -0.11352 | -2.34253 | 0.23078  |
| N | -0.48457 | -0.92363 | 0.18445  |
| C | -1.73934 | -0.51184 | 0.19838  |
| N | -2.77001 | -1.38168 | 0.0559   |
| C | -2.49699 | -2.81199 | -0.09112 |
| C | -2.07647 | 0.93816  | 0.44338  |
| C | -2.7916  | 1.58298  | -0.75378 |
| C | -4.31324 | 1.54314  | -0.58919 |
| C | -4.79593 | 0.23953  | 0.05763  |
| C | -4.1054  | -1.01579 | -0.47229 |
| C | 3.56346  | -1.63818 | -1.89823 |
| C | 4.42645  | -1.79001 | -0.81445 |
| C | 4.07574  | -1.35109 | 0.46522  |
| C | 2.82594  | -0.77223 | 0.62193  |
| C | 1.9423   | -0.6429  | -0.4506  |
| C | 2.31165  | -1.04251 | -1.71934 |
| C | 1.082    | 0.45172  | 1.49913  |
| C | 0.70497  | 0.12158  | -0.00318 |
| O | 0.43691  | 1.10802  | 2.28096  |
| C | 0.89058  | 2.91019  | -0.38266 |
| O | -0.10319 | 3.50365  | -0.55338 |

|   |          |          |          |
|---|----------|----------|----------|
| H | -1.04514 | -4.24137 | 0.6107   |
| H | -1.4672  | -2.98071 | 1.78129  |
| H | 0.74549  | -2.43137 | 0.90115  |
| H | 0.21369  | -2.66642 | -0.76196 |
| H | -3.37891 | -3.35327 | 0.26082  |
| H | -2.3503  | -3.06418 | -1.15131 |
| H | -2.71423 | 0.94473  | 1.33291  |
| H | -1.18082 | 1.48346  | 0.70087  |
| H | -2.42783 | 2.60637  | -0.85972 |
| H | -2.48431 | 1.06993  | -1.67135 |
| H | -4.7953  | 1.66767  | -1.56491 |
| H | -4.64446 | 2.38233  | 0.03143  |
| H | -4.69583 | 0.26717  | 1.14655  |
| H | -5.86497 | 0.11015  | -0.14032 |
| H | -4.73675 | -1.8749  | -0.23313 |
| H | -4.03955 | -0.96664 | -1.56918 |
| H | 3.87425  | -1.96658 | -2.88402 |
| H | 5.40058  | -2.24393 | -0.96596 |
| H | 4.76405  | -1.44562 | 1.29857  |
| H | 1.63622  | -0.87224 | -2.55275 |
| N | 2.24567  | -0.2381  | 1.78409  |
| H | 2.76528  | -0.0295  | 2.62494  |
| O | 0.31119  | 1.09251  | -0.78744 |
| S | 2.47702  | 2.8527   | -0.02569 |

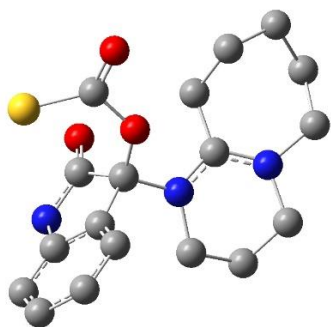

### INT2

|   |          |          |          |
|---|----------|----------|----------|
| C | -1.21445 | -3.2005  | 0.36582  |
| C | -0.02188 | -2.30636 | 0.12808  |
| N | -0.42676 | -0.8814  | 0.13018  |
| C | -1.71755 | -0.48816 | 0.15379  |
| N | -2.68098 | -1.34657 | -0.15987 |
| C | -2.32982 | -2.72474 | -0.53806 |
| C | -2.09671 | 0.9157   | 0.56147  |
| C | -2.93438 | 1.6359   | -0.50702 |
| C | -4.43172 | 1.50415  | -0.21933 |
| C | -4.78414 | 0.11695  | 0.32095  |
| C | -4.11484 | -1.03529 | -0.41791 |
| C | 3.68883  | -1.4089  | -1.77517 |
| C | 4.52532  | -1.55795 | -0.66871 |
| C | 4.11741  | -1.18116 | 0.61485  |
| C | 2.8402   | -0.65965 | 0.74814  |
| C | 1.99139  | -0.52186 | -0.35039 |

|   |          |          |          |
|---|----------|----------|----------|
| C | 2.40372  | -0.8787  | -1.61998 |
| C | 1.02685  | 0.45824  | 1.61328  |
| C | 0.69446  | 0.10986  | 0.10682  |
| O | 0.30582  | 1.02102  | 2.40662  |
| C | 0.80499  | 2.42976  | -0.78087 |
| O | 0.15565  | 3.17327  | -1.48523 |
| H | -0.94161 | -4.23058 | 0.13041  |
| H | -1.5431  | -3.15678 | 1.40814  |
| H | 0.72763  | -2.43767 | 0.91324  |
| H | 0.43819  | -2.54089 | -0.83347 |
| H | -3.22397 | -3.33656 | -0.42607 |
| H | -2.02309 | -2.74412 | -1.59043 |
| H | -2.66103 | 0.8105   | 1.4931   |
| H | -1.21419 | 1.4778   | 0.82527  |
| H | -2.6345  | 2.68541  | -0.54504 |
| H | -2.69992 | 1.21918  | -1.49245 |
| H | -5.00045 | 1.7001   | -1.13431 |
| H | -4.73805 | 2.25608  | 0.51569  |
| H | -4.57376 | 0.03406  | 1.39093  |
| H | -5.85992 | -0.05314 | 0.21332  |
| H | -4.6429  | -1.953   | -0.15689 |
| H | -4.21488 | -0.89909 | -1.50229 |
| H | 4.03775  | -1.70232 | -2.75934 |
| H | 5.52103  | -1.96874 | -0.80366 |
| H | 4.77626  | -1.28084 | 1.47075  |
| H | 1.74124  | -0.74867 | -2.47109 |
| N | 2.20534  | -0.18054 | 1.89819  |
| H | 2.6638   | -0.07126 | 2.79476  |
| O | 0.25499  | 1.12668  | -0.738   |
| S | 2.24778  | 2.74929  | 0.0999   |

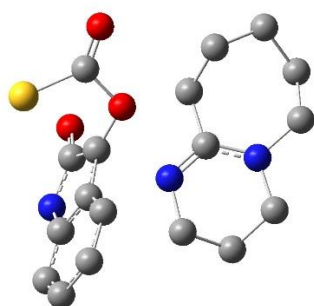

### TS2-3

|   |          |          |          |
|---|----------|----------|----------|
| C | -1.11211 | -3.26549 | 0.35674  |
| C | -0.00835 | -2.25047 | 0.1136   |
| N | -0.4632  | -0.89553 | 0.40157  |
| C | -1.72734 | -0.58615 | 0.31345  |
| N | -2.70427 | -1.46303 | -0.06394 |
| C | -2.33288 | -2.83317 | -0.42763 |
| C | -2.1472  | 0.80681  | 0.73138  |
| C | -2.88818 | 1.58527  | -0.36614 |
| C | -4.40592 | 1.42804  | -0.24618 |
| C | -4.80828 | -0.00027 | 0.13382  |

|   |          |          |          |
|---|----------|----------|----------|
| C | -4.02421 | -1.08209 | -0.60496 |
| C | 3.45066  | -1.61515 | -1.855   |
| C | 4.10464  | -2.12807 | -0.72638 |
| C | 3.77528  | -1.72685 | 0.56891  |
| C | 2.75888  | -0.79139 | 0.70434  |
| C | 2.10222  | -0.26911 | -0.42418 |
| C | 2.43832  | -0.67196 | -1.71225 |
| C | 1.21516  | 0.66288  | 1.60398  |
| C | 1.12071  | 0.66139  | 0.07577  |
| O | 0.2614   | 1.39388  | -0.68028 |
| O | 0.57089  | 1.29702  | 2.40639  |
| C | 0.7384   | 2.70759  | -0.76807 |
| O | 0.06882  | 3.53242  | -1.32061 |
| S | 2.29983  | 2.77552  | -0.01446 |
| H | -0.79278 | -4.26094 | 0.03908  |
| H | -1.35493 | -3.30764 | 1.42372  |
| H | 0.8528   | -2.46617 | 0.75407  |
| H | 0.33729  | -2.319   | -0.92539 |
| H | -3.18791 | -3.47695 | -0.20413 |
| H | -2.14022 | -2.89753 | -1.50783 |
| H | -2.78503 | 0.70542  | 1.61663  |
| H | -1.25843 | 1.33331  | 1.0598   |
| H | -2.60923 | 2.64127  | -0.31218 |
| H | -2.54804 | 1.2357   | -1.34754 |
| H | -4.87906 | 1.70331  | -1.19524 |
| H | -4.79147 | 2.1182   | 0.51261  |
| H | -4.70978 | -0.1676  | 1.2110   |
| H | -5.86594 | -0.15224 | -0.10317 |
| H | -4.61039 | -2.00332 | -0.57692 |
| H | -3.91551 | -0.80948 | -1.6652  |
| H | 3.73954  | -1.95562 | -2.84305 |
| H | 4.89313  | -2.86192 | -0.86065 |
| H | 4.28512  | -2.13216 | 1.43587  |
| H | 1.91971  | -0.25737 | -2.57118 |
| N | 2.22165  | -0.24187 | 1.86469  |
| H | 2.53702  | -0.45199 | 2.80362  |

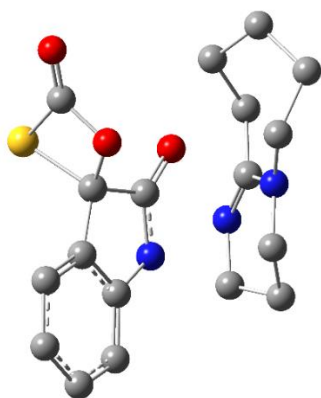

**INT3**

|   |          |          |         |
|---|----------|----------|---------|
| C | -1.34975 | -3.3635  | 0.27739 |
| C | -0.18383 | -2.40282 | 0.45106 |

|   |          |          |          |
|---|----------|----------|----------|
| N | -0.60362 | -1.05622 | 0.82209  |
| C | -1.79596 | -0.65694 | 0.52893  |
| N | -2.76032 | -1.40861 | -0.12188 |
| C | -2.36368 | -2.71548 | -0.64617 |
| C | -2.16185 | 0.73329  | 1.01613  |
| C | -2.71097 | 1.6753   | -0.06415 |
| C | -4.23537 | 1.60707  | -0.17335 |
| C | -4.7556  | 0.1706   | -0.06844 |
| C | -3.91303 | -0.84526 | -0.83811 |
| C | 3.11351  | -1.83637 | -1.91258 |
| C | 3.5394   | -2.57629 | -0.80753 |
| C | 3.32854  | -2.13199 | 0.50075  |
| C | 2.66783  | -0.92464 | 0.66315  |
| C | 2.24955  | -0.17011 | -0.43923 |
| C | 2.46814  | -0.6099  | -1.73299 |
| C | 1.54386  | 0.82929  | 1.61604  |
| C | 1.61878  | 1.06681  | 0.08572  |
| O | 0.36753  | 1.47288  | -0.48102 |
| O | 0.99309  | 1.55173  | 2.41382  |
| C | 0.69442  | 2.74019  | -0.83009 |
| O | -0.00714 | 3.55816  | -1.32774 |
| S | 2.4077   | 2.69799  | -0.32237 |
| H | -1.01815 | -4.31932 | -0.13755 |
| H | -1.81938 | -3.56039 | 1.24776  |
| H | 0.50322  | -2.7671  | 1.22447  |
| H | 0.40275  | -2.35759 | -0.47893 |
| H | -3.26486 | -3.33104 | -0.72747 |
| H | -1.94344 | -2.61259 | -1.6588  |
| H | -2.88865 | 0.64558  | 1.83392  |
| H | -1.24301 | 1.13319  | 1.44271  |
| H | -2.39862 | 2.701    | 0.15563  |
| H | -2.25007 | 1.42461  | -1.02642 |
| H | -4.55427 | 2.04553  | -1.12588 |
| H | -4.69141 | 2.21002  | 0.6204   |
| H | -4.81145 | -0.15036 | 0.97719  |
| H | -5.77695 | 0.12595  | -0.45962 |
| H | -4.54625 | -1.70481 | -1.07415 |
| H | -3.59672 | -0.41808 | -1.80325 |
| H | 3.29028  | -2.21226 | -2.91433 |
| H | 4.04659  | -3.52311 | -0.96426 |
| H | 3.65097  | -2.71484 | 1.35681  |
| H | 2.1399   | -0.01676 | -2.58187 |
| N | 2.29495  | -0.28659 | 1.85385  |
| H | 2.37744  | -0.70319 | 2.77341  |



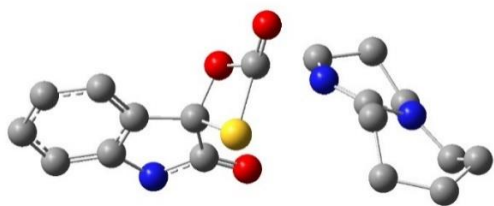

**TS3-4**

|   |          |          |          |
|---|----------|----------|----------|
| C | 2.44994  | 2.66867  | 1.24904  |
| C | 1.13224  | 1.91436  | 1.19002  |
| N | 1.3375   | 0.49435  | 0.9391   |
| C | 2.44242  | 0.03494  | 0.44893  |
| N | 3.48697  | 0.8239   | 0.03174  |
| C | 3.2794   | 2.2735   | 0.04169  |
| C | 2.6057   | -1.47034 | 0.40486  |
| C | 2.89512  | -2.03228 | -0.99417 |
| C | 4.39808  | -2.13718 | -1.26792 |
| C | 5.1777   | -0.94076 | -0.71354 |
| C | 4.50096  | 0.40713  | -0.95241 |
| C | -5.45626 | -0.96124 | 0.67964  |
| C | -6.00198 | -0.2339  | -0.37895 |
| C | -5.20008 | 0.5171   | -1.24393 |
| C | -3.83449 | 0.51045  | -1.00729 |
| C | -3.27609 | -0.2225  | 0.04351  |
| C | -4.07516 | -0.96201 | 0.89658  |
| C | -1.58653 | 0.97723  | -1.15171 |
| C | -1.79202 | -0.02819 | 0.01719  |
| O | -1.23912 | 0.41674  | 1.25775  |
| O | -0.53838 | 1.46413  | -1.51404 |
| C | -0.31409 | -0.59894 | 1.4941   |
| O | -0.03629 | -1.03498 | 2.57303  |
| S | -0.73423 | -1.5215  | -0.07905 |
| H | 2.27798  | 3.74802  | 1.25132  |
| H | 2.99633  | 2.40946  | 2.16234  |
| H | 0.58653  | 2.00239  | 2.13633  |
| H | 0.4866   | 2.32139  | 0.40645  |
| H | 4.26323  | 2.74934  | 0.06996  |
| H | 2.77954  | 2.59163  | -0.88566 |
| H | 3.41433  | -1.74238 | 1.0926   |
| H | 1.70293  | -1.90403 | 0.83031  |
| H | 2.42922  | -3.01706 | -1.09424 |
| H | 2.41846  | -1.39091 | -1.74461 |
| H | 4.5658   | -2.21689 | -2.34759 |
| H | 4.79178  | -3.05507 | -0.81721 |
| H | 5.36248  | -1.05286 | 0.35985  |
| H | 6.16179  | -0.90281 | -1.19095 |
| H | 5.26682  | 1.18557  | -0.90985 |
| H | 4.07405  | 0.44069  | -1.9667  |
| H | -6.10674 | -1.53067 | 1.33456  |
| H | -7.07566 | -0.24697 | -0.53798 |
| H | -5.62671 | 1.086    | -2.06287 |

|   |          |          |          |
|---|----------|----------|----------|
| H | -3.63255 | -1.52707 | 1.71234  |
| N | -2.82061 | 1.18574  | -1.70134 |
| H | -2.97436 | 1.80499  | -2.48797 |

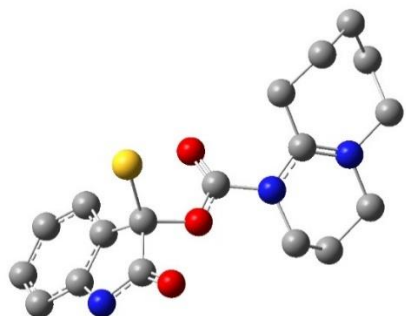

#### INT 4

|   |          |          |          |
|---|----------|----------|----------|
| C | -2.01486 | 2.86901  | -0.63616 |
| C | -1.16526 | 2.14235  | 0.38264  |
| N | -1.30677 | 0.69573  | 0.12682  |
| C | -2.54227 | 0.15079  | -0.05644 |
| N | -3.56589 | 0.94002  | -0.29791 |
| C | -3.44573 | 2.40735  | -0.48628 |
| C | -2.68045 | -1.34858 | 0.13678  |
| C | -3.93967 | -1.80804 | 0.88238  |
| C | -5.13139 | -2.00064 | -0.0504  |
| C | -5.24969 | -0.83104 | -1.02532 |
| C | -4.9911  | 0.51203  | -0.35342 |
| C | 3.75751  | -0.90816 | -2.64004 |
| C | 4.90487  | -0.14989 | -2.41053 |
| C | 5.09976  | 0.50765  | -1.19364 |
| C | 4.10406  | 0.38992  | -0.23449 |
| C | 2.93702  | -0.35852 | -0.44921 |
| C | 2.77241  | -1.02704 | -1.65349 |
| C | 2.91795  | 0.66119  | 1.712    |
| C | 2.1187   | -0.33629 | 0.82835  |
| O | 0.84453  | 0.40075  | 0.67891  |
| O | 2.58215  | 1.12052  | 2.78237  |
| C | -0.13178 | -0.09754 | -0.05096 |
| O | -0.09909 | -1.04713 | -0.78985 |
| S | 1.95257  | -1.91569 | 1.66244  |
| H | -1.96997 | 3.94764  | -0.47471 |
| H | -1.64095 | 2.65273  | -1.64058 |
| H | -0.11412 | 2.39916  | 0.29131  |
| H | -1.4951  | 2.35142  | 1.40453  |
| H | -4.02867 | 2.65256  | -1.37549 |
| H | -3.92764 | 2.87281  | 0.37933  |
| H | -2.60808 | -1.83425 | -0.84146 |
| H | -1.80573 | -1.66703 | 0.70045  |
| H | -3.69705 | -2.74951 | 1.38177  |
| H | -4.18009 | -1.09423 | 1.67708  |
| H | -6.0479  | -2.08582 | 0.54256  |
| H | -5.01885 | -2.9342  | -0.61134 |
| H | -4.55587 | -0.94413 | -1.86512 |

|   |          |          |          |
|---|----------|----------|----------|
| H | -6.25413 | -0.7957  | -1.4557  |
| H | -5.48875 | 1.29952  | -0.91766 |
| H | -5.39124 | 0.53988  | 0.66544  |
| H | 3.62949  | -1.41789 | -3.58953 |
| H | 5.66371  | -0.07135 | -3.18304 |
| H | 5.99475  | 1.08989  | -0.99979 |
| H | 1.88807  | -1.63034 | -1.8187  |
| N | 4.0837   | 0.9443   | 1.0472   |
| H | 4.78864  | 1.56924  | 1.4167   |

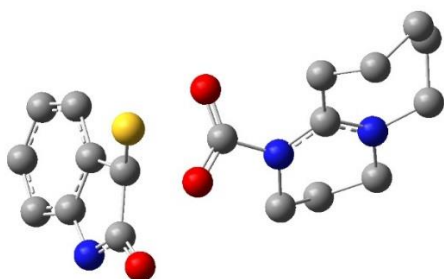

**TS4-S-isatin**

|   |          |          |          |
|---|----------|----------|----------|
| C | 1.97141  | 2.89054  | -0.68295 |
| C | 0.98697  | 1.82782  | -1.11711 |
| N | 1.24454  | 0.61268  | -0.32674 |
| C | 2.49037  | 0.20891  | -0.02339 |
| N | 3.52741  | 0.99896  | -0.26574 |
| C | 3.37448  | 2.35179  | -0.84735 |
| C | 2.64683  | -1.19663 | 0.53136  |
| C | 3.85326  | -1.98846 | 0.0113   |
| C | 5.11747  | -1.73001 | 0.82643  |
| C | 5.2938   | -0.23662 | 1.09761  |
| C | 4.95635  | 0.62007  | -0.11784 |
| C | -3.68632 | 0.8879   | 2.59675  |
| C | -4.43655 | 1.80436  | 1.85377  |
| C | -4.50142 | 1.73366  | 0.45745  |
| C | -3.78154 | 0.72204  | -0.16237 |
| C | -3.01713 | -0.19932 | 0.56908  |
| C | -2.97046 | -0.12713 | 1.95268  |
| C | -2.94165 | -0.69155 | -1.76769 |
| C | -2.40314 | -1.1554  | -0.3894  |
| O | -0.80739 | -0.22074 | -0.78439 |
| O | -2.74271 | -1.20014 | -2.85154 |
| C | 0.05592  | -0.10767 | 0.15029  |
| O | 0.0079   | -0.46653 | 1.31233  |
| S | -2.13653 | -2.78525 | -0.08034 |
| H | 1.85747  | 3.78862  | -1.29508 |
| H | 1.78612  | 3.15902  | 0.36242  |
| H | -0.04244 | 2.13178  | -0.93027 |
| H | 1.09385  | 1.59308  | -2.18161 |
| H | 4.09318  | 2.99719  | -0.3395  |
| H | 3.65615  | 2.29031  | -1.90491 |
| H | 2.66082  | -1.14141 | 1.62587  |
| H | 1.74079  | -1.73989 | 0.26628  |

|   |          |          |          |
|---|----------|----------|----------|
| H | 3.59234  | -3.05039 | 0.05323  |
| H | 4.0205   | -1.75643 | -1.04703 |
| H | 5.98747  | -2.11546 | 0.28206  |
| H | 5.06403  | -2.27157 | 1.77817  |
| H | 4.67496  | 0.08748  | 1.94261  |
| H | 6.33148  | -0.02366 | 1.37397  |
| H | 5.48419  | 1.57044  | -0.04112 |
| H | 5.28533  | 0.14256  | -1.04856 |
| H | -3.65965 | 0.96578  | 3.67953  |
| H | -4.9886  | 2.58647  | 2.3678   |
| H | -5.09472 | 2.43741  | -0.11876 |
| H | -2.37818 | -0.84514 | 2.51149  |
| N | -3.70014 | 0.42383  | -1.52704 |
| H | -4.19784 | 0.92303  | -2.25742 |

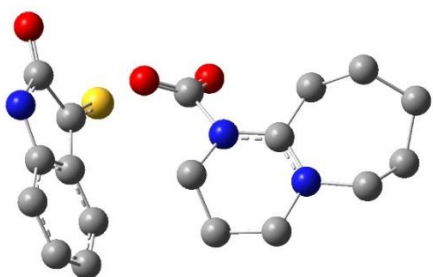

**3-thioisatin**

|   |          |          |          |
|---|----------|----------|----------|
| C | -1.01092 | -2.33584 | 0.14435  |
| C | -0.46666 | -1.30589 | -0.82131 |
| N | -1.05424 | -0.00307 | -0.49588 |
| C | -2.35697 | 0.09574  | -0.22452 |
| N | -3.09664 | -0.99981 | -0.02835 |
| C | -2.51616 | -2.35936 | 0.00826  |
| C | -2.9794  | 1.48195  | -0.21359 |
| C | -4.3488  | 1.60348  | -0.89455 |
| C | -5.50574 | 1.31493  | 0.05799  |
| C | -5.22057 | 0.06919  | 0.89483  |
| C | -4.57509 | -1.04323 | 0.07557  |
| C | 2.27696  | -2.65396 | 1.2154   |
| C | 2.76157  | -3.08812 | -0.02354 |
| C | 3.2869   | -2.19886 | -0.96588 |
| C | 3.31024  | -0.85357 | -0.62896 |
| C | 2.82306  | -0.40116 | 0.61444  |
| C | 2.30275  | -1.29894 | 1.541    |
| C | 3.56889  | 1.4171   | -0.72157 |
| C | 2.95753  | 1.04458  | 0.64153  |
| O | 0.87344  | 1.03194  | -1.21752 |
| O | 3.86458  | 2.51821  | -1.12199 |
| C | -0.06661 | 1.17277  | -0.42815 |
| O | -0.34309 | 2.03465  | 0.40498  |
| S | 2.60668  | 2.11283  | 1.80519  |
| H | -0.6095  | -3.32845 | -0.07321 |
| H | -0.72077 | -2.06554 | 1.16454  |
| H | 0.61356  | -1.20122 | -0.75481 |

|   |          |          |          |
|---|----------|----------|----------|
| H | -0.72301 | -1.57117 | -1.85392 |
| H | -2.97257 | -2.8767  | 0.85497  |
| H | -2.8203  | -2.87757 | -0.90821 |
| H | -3.02786 | 1.83417  | 0.82209  |
| H | -2.2728  | 2.13706  | -0.71267 |
| H | -4.43544 | 2.62018  | -1.28758 |
| H | -4.39112 | 0.93773  | -1.76361 |
| H | -6.42716 | 1.17438  | -0.51729 |
| H | -5.6659  | 2.17261  | 0.72013  |
| H | -4.56871 | 0.30387  | 1.74302  |
| H | -6.15031 | -0.32289 | 1.31682  |
| H | -4.78968 | -2.00042 | 0.55053  |
| H | -4.99946 | -1.08673 | -0.93435 |
| H | 1.8756   | -3.3751  | 1.91917  |
| H | 2.73143  | -4.14664 | -0.26364 |
| H | 3.65874  | -2.54547 | -1.92397 |
| H | 1.92384  | -0.93913 | 2.49345  |
| N | 3.77201  | 0.22339  | -1.37564 |
| H | 4.1115   | 0.16492  | -2.32683 |

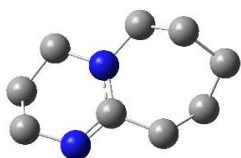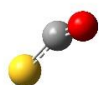

### DBU-COS-TS

|   |          |          |          |
|---|----------|----------|----------|
| C | -0.36145 | 2.71325  | -0.42595 |
| C | -1.2933  | 1.79676  | 0.35363  |
| N | -0.93498 | 0.40729  | 0.14067  |
| C | 0.31517  | 0.0839   | 0.01371  |
| N | 1.33677  | 0.98725  | 0.05151  |
| C | 1.06002  | 2.42831  | 0.01893  |
| C | 0.59333  | -1.39226 | -0.23699 |
| C | 1.82478  | -1.70777 | -1.08816 |
| C | 3.10092  | -1.77895 | -0.25039 |
| C | 3.16873  | -0.62944 | 0.75437  |
| C | 2.777    | 0.71229  | 0.14829  |
| C | -2.5895  | -1.05043 | 0.44386  |
| O | -2.09722 | -1.76591 | 1.21979  |
| S | -3.76119 | -0.49286 | -0.50965 |
| H | -0.59627 | 3.76667  | -0.25442 |
| H | -0.46911 | 2.50968  | -1.49671 |
| H | -1.24439 | 2.04244  | 1.42468  |
| H | -2.33345 | 1.92876  | 0.03751  |
| H | 1.77973  | 2.88744  | -0.66817 |
| H | 1.24348  | 2.85022  | 1.0161   |
| H | -0.30435 | -1.76843 | -0.7308  |
| H | 0.65316  | -1.91453 | 0.72553  |
| H | 1.66613  | -2.65962 | -1.60349 |

|   |         |          |          |
|---|---------|----------|----------|
| H | 1.92901 | -0.94642 | -1.87021 |
| H | 3.13865 | -2.73293 | 0.28754  |
| H | 3.97605 | -1.74715 | -0.90897 |
| H | 4.18733 | -0.53606 | 1.14297  |
| H | 2.52398 | -0.82733 | 1.61792  |
| H | 3.24367 | 0.83447  | -0.84016 |
| H | 3.17652 | 1.51007  | 0.78375  |

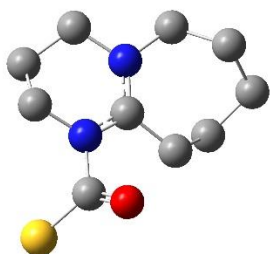

**DBU-COS adduct**

|   |          |          |          |
|---|----------|----------|----------|
| C | -0.76071 | 2.5741   | -0.46591 |
| C | -1.57434 | 1.65469  | 0.42018  |
| N | -1.06055 | 0.28767  | 0.28256  |
| C | 0.22961  | 0.03446  | 0.07618  |
| N | 1.11062  | 1.02937  | -0.00982 |
| C | 0.69343  | 2.4428   | -0.07282 |
| C | 0.6193   | -1.41694 | -0.1424  |
| C | 1.85809  | -1.65365 | -1.00658 |
| C | 3.15479  | -1.55806 | -0.20763 |
| C | 3.14146  | -0.3306  | 0.70082  |
| C | 2.58573  | 0.9046   | 0.00644  |
| C | -2.0448  | -0.83272 | 0.47615  |
| O | -1.79035 | -1.58876 | 1.39181  |
| S | -3.34683 | -0.84812 | -0.63558 |
| H | -1.08081 | 3.60986  | -0.33876 |
| H | -0.90241 | 2.2924   | -1.51397 |
| H | -1.50459 | 1.95842  | 1.47073  |
| H | -2.62306 | 1.62826  | 0.12647  |
| H | 1.34497  | 2.92798  | -0.80451 |
| H | 0.88043  | 2.89947  | 0.90539  |
| H | -0.24088 | -1.88174 | -0.62882 |
| H | 0.71318  | -1.90476 | 0.83296  |
| H | 1.76828  | -2.64587 | -1.45691 |
| H | 1.86589  | -0.93836 | -1.8366  |
| H | 3.28679  | -2.46048 | 0.39875  |
| H | 4.00466  | -1.50322 | -0.89612 |
| H | 4.15677  | -0.09439 | 1.03167  |
| H | 2.55586  | -0.51963 | 1.60748  |
| H | 2.95822  | 0.9854   | -1.02181 |
| H | 2.92293  | 1.79526  | 0.5429   |

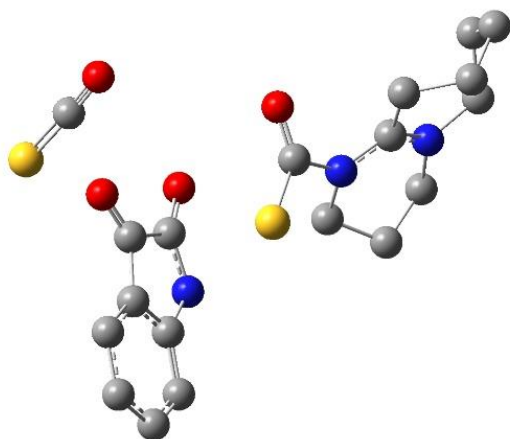

### INT5

|   |          |          |          |
|---|----------|----------|----------|
| C | -4.94359 | -2.89597 | 1.00265  |
| C | -4.47858 | -3.50688 | -0.16534 |
| C | -3.56892 | -2.87806 | -1.0214  |
| C | -3.13611 | -1.61107 | -0.66551 |
| C | -3.5927  | -0.98958 | 0.50727  |
| C | -4.49933 | -1.61993 | 1.34799  |
| C | -2.02988 | 0.39827  | -0.68593 |
| C | -2.95255 | 0.33338  | 0.57281  |
| O | -1.31604 | 1.32256  | -1.01009 |
| C | -2.70619 | 3.73748  | -0.09295 |
| O | -1.81996 | 3.92811  | 0.61999  |
| H | -5.65012 | -3.41752 | 1.63874  |
| H | -4.83319 | -4.50068 | -0.42084 |
| H | -3.21697 | -3.36087 | -1.92654 |
| H | -4.84479 | -1.12454 | 2.25026  |
| N | -2.2429  | -0.77656 | -1.35218 |
| H | -1.77327 | -1.03045 | -2.21281 |
| O | -3.10558 | 1.24835  | 1.34535  |
| S | -3.93215 | 3.5676   | -1.06902 |
| C | 2.17219  | -1.66521 | -2.08916 |
| C | 1.21643  | -0.81475 | -1.28187 |
| N | 1.87332  | -0.39254 | -0.03807 |
| C | 3.19519  | -0.22088 | 0.04932  |
| N | 3.97176  | -0.37183 | -1.01993 |
| C | 3.44729  | -0.88242 | -2.29987 |
| C | 3.77243  | 0.04604  | 1.42961  |
| C | 5.19038  | -0.47767 | 1.66499  |
| C | 6.25708  | 0.50838  | 1.19696  |
| C | 5.90926  | 1.05978  | -0.1836  |
| C | 5.40607  | -0.01826 | -1.13197 |
| C | 0.98065  | -0.02635 | 1.11035  |
| O | 1.18422  | 1.06633  | 1.59753  |
| S | -0.1665  | -1.22209 | 1.56181  |
| H | 1.73076  | -1.91524 | -3.05572 |
| H | 2.38382  | -2.59608 | -1.55364 |
| H | 0.90191  | 0.07419  | -1.8396  |
| H | 0.32926  | -1.37457 | -0.98608 |

|   |         |          |          |
|---|---------|----------|----------|
| H | 4.23018 | -1.51302 | -2.72861 |
| H | 3.28643 | -0.0321  | -2.97181 |
| H | 3.09516 | -0.44142 | 2.13253  |
| H | 3.70354 | 1.11706  | 1.64112  |
| H | 5.30321 | -0.67242 | 2.73488  |
| H | 5.31359 | -1.44288 | 1.1614   |
| H | 6.34107 | 1.33451  | 1.91098  |
| H | 7.23039 | 0.00747  | 1.1642   |
| H | 6.79127 | 1.51504  | -0.64296 |
| H | 5.15383 | 1.85011  | -0.11312 |
| H | 6.00046 | -0.93573 | -1.04399 |
| H | 5.5108  | 0.33716  | -2.16005 |

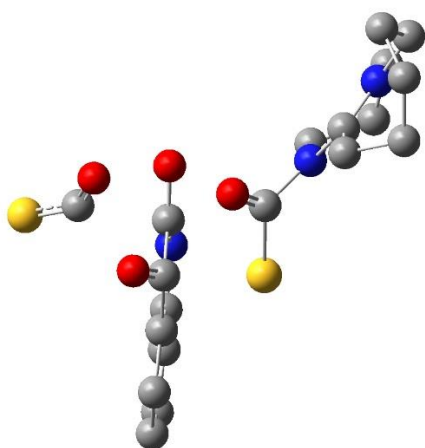

**TS5-6**

|   |          |          |          |
|---|----------|----------|----------|
| C | -5.21    | -1.53358 | 1.8304   |
| C | -5.44714 | -2.32381 | 0.70449  |
| C | -4.65618 | -2.22073 | -0.44409 |
| C | -3.61782 | -1.30231 | -0.42174 |
| C | -3.36398 | -0.51315 | 0.7081   |
| C | -4.15767 | -0.61336 | 1.83708  |
| C | -1.86143 | 0.02406  | -1.0858  |
| C | -2.20917 | 0.38127  | 0.3882   |
| O | -0.99818 | 0.53949  | -1.76793 |
| C | -1.95442 | 2.95327  | -0.43816 |
| O | -0.94468 | 3.49194  | -0.20277 |
| H | -5.84686 | -1.63416 | 2.70274  |
| H | -6.26863 | -3.03342 | 0.71373  |
| H | -4.851   | -2.82761 | -1.32199 |
| H | -3.95836 | 0.0097   | 2.70398  |
| N | -2.70744 | -0.99    | -1.44075 |
| H | -2.70104 | -1.42138 | -2.35699 |
| O | -2.10485 | 1.57338  | 0.81422  |
| S | -3.3607  | 2.95537  | -1.29771 |
| C | 2.4141   | -2.46785 | -1.53687 |
| C | 1.35191  | -1.42706 | -1.26823 |
| N | 1.77245  | -0.6039  | -0.11729 |
| C | 3.07509  | -0.32547 | 0.11637  |
| N | 4.00801  | -0.78599 | -0.6968  |
| C | 3.7198   | -1.75012 | -1.77972 |



|   |          |          |          |
|---|----------|----------|----------|
| C | 3.41333  | 0.42607  | 1.39259  |
| C | 4.77123  | 0.09441  | 2.01526  |
| C | 5.90158  | 0.92165  | 1.41     |
| C | 5.78769  | 0.94801  | -0.11201 |
| C | 5.44659  | -0.41551 | -0.69262 |
| C | 0.73015  | 0.09401  | 0.62679  |
| O | 0.83965  | 1.27188  | 0.84006  |
| S | -0.60088 | -0.91491 | 1.19022  |
| H | 2.15025  | -3.0525  | -2.41984 |
| H | 2.50109  | -3.14609 | -0.6827  |
| H | 1.20823  | -0.77234 | -2.13243 |
| H | 0.39419  | -1.87744 | -1.01147 |
| H | 4.56007  | -2.44818 | -1.79945 |
| H | 3.70544  | -1.2006  | -2.72645 |
| H | 2.62946  | 0.17039  | 2.10642  |
| H | 3.31461  | 1.49976  | 1.20748  |
| H | 4.69926  | 0.28414  | 3.08934  |
| H | 4.97532  | -0.97611 | 1.90421  |
| H | 5.86511  | 1.94485  | 1.79816  |
| H | 6.86606  | 0.49565  | 1.70528  |
| H | 6.73415  | 1.26421  | -0.55933 |
| H | 5.03334  | 1.6717   | -0.43959 |
| H | 6.00482  | -1.21751 | -0.19641 |
| H | 5.72107  | -0.43342 | -1.74978 |

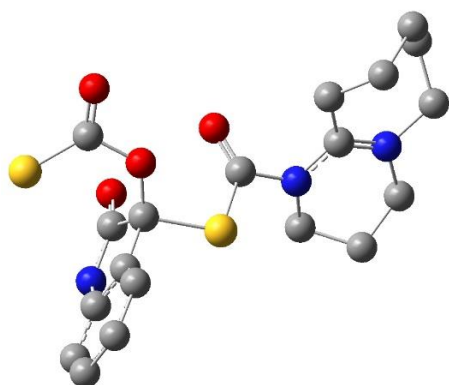

**INT6**

|   |          |          |          |
|---|----------|----------|----------|
| C | -4.4981  | -1.15783 | 2.50745  |
| C | -5.1519  | -2.02153 | 1.62875  |
| C | -4.77447 | -2.12726 | 0.28581  |
| C | -3.72097 | -1.33586 | -0.14481 |
| C | -3.06217 | -0.46499 | 0.73067  |
| C | -3.43164 | -0.37048 | 2.05954  |
| C | -2.21208 | -0.24507 | -1.50135 |
| C | -1.94717 | 0.20621  | -0.0288  |
| O | -1.60849 | 0.09902  | -2.49037 |
| C | -2.56987 | 2.56657  | -0.20736 |
| O | -2.16287 | 3.67248  | 0.07295  |
| H | -4.81714 | -1.0972  | 3.54234  |
| H | -5.97601 | -2.62816 | 1.99115  |
| H | -5.28868 | -2.79677 | -0.39543 |
| H | -2.91253 | 0.30875  | 2.72986  |

|   |          |          |          |
|---|----------|----------|----------|
| N | -3.1625  | -1.23593 | -1.41916 |
| H | -3.54376 | -1.6821  | -2.24425 |
| O | -1.6868  | 1.54292  | 0.21177  |
| S | -4.03372 | 2.11721  | -1.00095 |
| C | 3.10036  | -2.96469 | -0.36312 |
| C | 2.04364  | -2.10993 | -1.02506 |
| N | 2.06654  | -0.77841 | -0.38365 |
| C | 3.22251  | -0.19357 | 0.01452  |
| N | 4.35832  | -0.847   | -0.09342 |
| C | 4.43221  | -2.26616 | -0.50996 |
| C | 3.10819  | 1.17896  | 0.64812  |
| C | 4.15799  | 1.50996  | 1.71109  |
| C | 5.45271  | 2.04352  | 1.10493  |
| C | 5.87928  | 1.20003  | -0.09429 |
| C | 5.71654  | -0.293   | 0.14863  |
| C | 0.85627  | 0.00873  | -0.47683 |
| O | 0.80354  | 1.02687  | -1.09738 |
| S | -0.42969 | -0.72849 | 0.50771  |
| H | 3.15019  | -3.94138 | -0.84702 |
| H | 2.85313  | -3.10932 | 0.69248  |
| H | 2.24301  | -1.98502 | -2.09411 |
| H | 1.04422  | -2.52572 | -0.90132 |
| H | 5.19251  | -2.72974 | 0.12245  |
| H | 4.78425  | -2.28736 | -1.54583 |
| H | 2.12125  | 1.21928  | 1.11315  |
| H | 3.10137  | 1.92897  | -0.1505  |
| H | 3.72372  | 2.25248  | 2.38513  |
| H | 4.35442  | 0.61958  | 2.3179   |
| H | 5.31645  | 3.08298  | 0.78926  |
| H | 6.2398   | 2.03526  | 1.86586  |
| H | 6.93305  | 1.37762  | -0.32594 |
| H | 5.31515  | 1.47589  | -0.99208 |
| H | 6.0237   | -0.57794 | 1.16085  |
| H | 6.34874  | -0.8421  | -0.55189 |

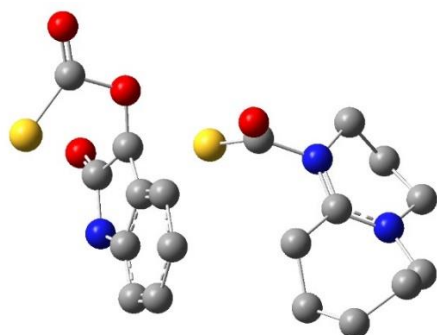

**TS6-3**

|   |          |         |          |
|---|----------|---------|----------|
| C | -0.71847 | 2.80706 | -1.09788 |
| C | -0.65784 | 3.41808 | 0.15598  |
| C | -1.15672 | 2.78951 | 1.30141  |
| C | -1.72013 | 1.52945 | 1.1534   |
| C | -1.75674 | 0.89713 | -0.10467 |
| C | -1.27463 | 1.53294 | -1.23738 |

|   |          |          |          |
|---|----------|----------|----------|
| C | -2.82533 | -0.46539 | 1.56259  |
| C | -2.37333 | -0.42375 | 0.10127  |
| O | -3.32826 | -1.3735  | 2.17228  |
| C | -4.19481 | -0.897   | -1.21192 |
| O | -4.71711 | -1.5435  | -2.06632 |
| H | -0.34973 | 3.33338  | -1.97202 |
| H | -0.23354 | 4.41387  | 0.24638  |
| H | -1.13335 | 3.28336  | 2.26721  |
| H | -1.34227 | 1.04013  | -2.20003 |
| N | -2.32112 | 0.71964  | 2.10314  |
| H | -2.50929 | 0.9787   | 3.05865  |
| O | -2.84625 | -1.2349  | -0.87043 |
| S | -4.73358 | 0.44719  | -0.26246 |
| C | 3.44778  | -2.92261 | 0.82025  |
| C | 2.37771  | -2.86929 | -0.25422 |
| N | 1.91316  | -1.48525 | -0.36569 |
| C | 2.69694  | -0.43822 | -0.16872 |
| N | 3.99244  | -0.61111 | 0.12151  |
| C | 4.54005  | -1.93742 | 0.45222  |
| C | 2.02995  | 0.92253  | -0.21843 |
| C | 2.74733  | 2.05905  | 0.50429  |
| C | 3.88495  | 2.66122  | -0.31525 |
| C | 4.76163  | 1.56747  | -0.92567 |
| C | 5.04155  | 0.42635  | 0.04629  |
| C | 0.45447  | -1.27412 | -0.68777 |
| O | 0.20625  | -0.85813 | -1.78501 |
| S | -0.54841 | -1.64567 | 0.65598  |
| H | 3.87037  | -3.92601 | 0.89947  |
| H | 3.0011   | -2.66104 | 1.7842   |
| H | 2.76287  | -3.20013 | -1.22513 |
| H | 1.51028  | -3.47954 | 0.00362  |
| H | 5.23524  | -1.79571 | 1.28556  |
| H | 5.11796  | -2.2994  | -0.40725 |
| H | 1.04537  | 0.7885   | 0.24629  |
| H | 1.81629  | 1.17128  | -1.2642  |
| H | 1.99753  | 2.82137  | 0.72975  |
| H | 3.11613  | 1.69741  | 1.47139  |
| H | 3.47643  | 3.28772  | -1.11474 |
| H | 4.49148  | 3.31344  | 0.32163  |
| H | 5.72138  | 1.98483  | -1.24276 |
| H | 4.29732  | 1.14979  | -1.82633 |
| H | 5.2509   | 0.80537  | 1.05466  |
| H | 5.9348   | -0.11212 | -0.28433 |

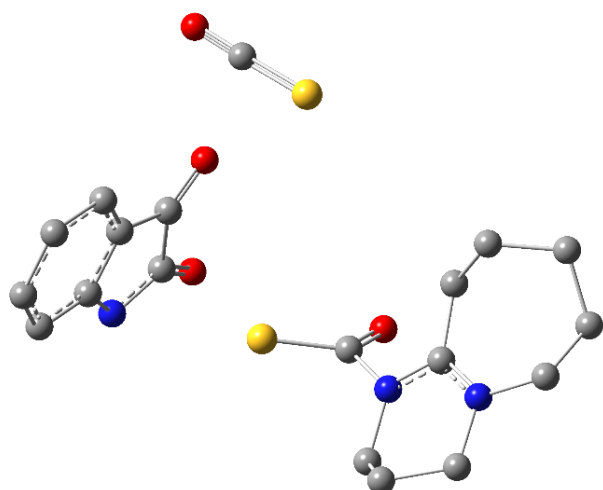

### INT 7

|   |          |          |          |
|---|----------|----------|----------|
| C | 4.1224   | -0.51549 | -2.67354 |
| C | 4.36832  | -1.87398 | -2.45279 |
| C | 4.26451  | -2.4504  | -1.18391 |
| C | 3.90163  | -1.61873 | -0.13554 |
| C | 3.64613  | -0.2537  | -0.34615 |
| C | 3.75663  | 0.30898  | -1.61059 |
| C | 3.33819  | -0.87462 | 1.95932  |
| C | 3.28014  | 0.32134  | 0.95727  |
| O | 3.03009  | 1.45773  | 1.2817   |
| O | 3.11845  | -0.82817 | 3.14707  |
| C | 2.48143  | 3.75465  | -0.35524 |
| O | 3.61588  | 3.94888  | -0.25514 |
| S | 0.93334  | 3.53357  | -0.52107 |
| H | 4.21661  | -0.10647 | -3.67331 |
| H | 4.65083  | -2.50411 | -3.29055 |
| H | 4.4603   | -3.50507 | -1.02367 |
| H | 3.56337  | 1.36667  | -1.76161 |
| N | 3.74132  | -1.95143 | 1.21439  |
| H | 3.82415  | -2.89071 | 1.58263  |
| C | -3.28551 | -2.856   | -1.17959 |
| C | -2.48447 | -2.73811 | 0.10004  |
| N | -2.29202 | -1.31675 | 0.40705  |
| C | -3.20854 | -0.39756 | 0.1146   |
| N | -4.35213 | -0.74305 | -0.47315 |
| C | -4.58402 | -2.10294 | -0.99549 |
| C | -2.84601 | 1.04815  | 0.40302  |
| C | -3.50983 | 2.09371  | -0.49334 |
| C | -4.90355 | 2.4808   | -0.00662 |
| C | -5.71175 | 1.23951  | 0.3653   |
| C | -5.54937 | 0.11111  | -0.64335 |
| C | -1.0363  | -0.94373 | 1.14364  |
| O | -1.20653 | -0.44563 | 2.23705  |
| S | 0.41628  | -1.27696 | 0.29802  |
| H | -3.49998 | -3.90296 | -1.40158 |
| H | -2.7115  | -2.4345  | -2.01066 |

|   |          |          |          |
|---|----------|----------|----------|
| H | -3.00603 | -3.21689 | 0.93622  |
| H | -1.49233 | -3.17775 | 0.00167  |
| H | -5.10913 | -1.98711 | -1.9473  |
| H | -5.24934 | -2.62768 | -0.301   |
| H | -1.76369 | 1.11021  | 0.27152  |
| H | -3.03346 | 1.2519   | 1.46215  |
| H | -2.86338 | 2.9756   | -0.51689 |
| H | -3.55419 | 1.71637  | -1.52105 |
| H | -4.82518 | 3.14029  | 0.86421  |
| H | -5.42174 | 3.04125  | -0.79191 |
| H | -6.77645 | 1.48407  | 0.41773  |
| H | -5.42941 | 0.86999  | 1.35745  |
| H | -5.56815 | 0.49073  | -1.67203 |
| H | -6.38856 | -0.58144 | -0.53926 |

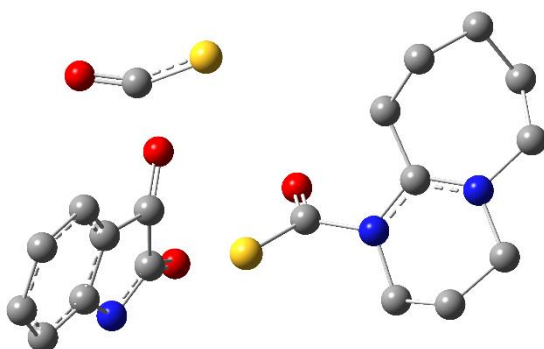

**TS7-8**

|   |          |          |          |
|---|----------|----------|----------|
| C | 4.74876  | 0.20375  | -2.20896 |
| C | 5.43183  | -0.96294 | -1.86066 |
| C | 5.10441  | -1.68281 | -0.71036 |
| C | 4.07862  | -1.19078 | 0.08347  |
| C | 3.39138  | -0.01015 | -0.24557 |
| C | 3.71556  | 0.68569  | -1.40317 |
| C | 2.57612  | -0.9739  | 1.81164  |
| C | 2.36139  | 0.19435  | 0.81461  |
| O | 1.88722  | 1.27162  | 1.25189  |
| O | 2.03041  | -1.13781 | 2.87742  |
| C | 2.01725  | 2.80394  | 0.23972  |
| O | 3.10577  | 3.20217  | 0.42727  |
| S | 0.56436  | 3.03462  | -0.4782  |
| H | 5.01842  | 0.7379   | -3.11349 |
| H | 6.23275  | -1.32424 | -2.49813 |
| H | 5.62924  | -2.59341 | -0.44169 |
| H | 3.17292  | 1.57953  | -1.69276 |
| N | 3.57643  | -1.73918 | 1.26439  |
| H | 3.94458  | -2.5698  | 1.71087  |
| C | -3.05424 | -2.94771 | -1.18341 |
| C | -2.05405 | -2.68587 | -0.07869 |
| N | -1.94861 | -1.23244 | 0.1233   |
| C | -2.99683 | -0.41138 | -0.03198 |
| N | -4.17735 | -0.8947  | -0.38923 |
| C | -4.36503 | -2.30251 | -0.79527 |

|   |          |          |          |
|---|----------|----------|----------|
| C | -2.73541 | 1.07354  | 0.1329   |
| C | -3.61838 | 1.99837  | -0.70594 |
| C | -4.95294 | 2.30039  | -0.02961 |
| C | -5.56935 | 1.02673  | 0.54421  |
| C | -5.46429 | -0.15754 | -0.4054  |
| C | -0.67035 | -0.71947 | 0.66016  |
| O | -0.68829 | -0.13491 | 1.71271  |
| S | 0.69274  | -1.02982 | -0.36897 |
| H | -3.2023  | -4.02105 | -1.31427 |
| H | -2.68326 | -2.52963 | -2.12403 |
| H | -2.37147 | -3.15183 | 0.86034  |
| H | -1.0604  | -3.0522  | -0.33462 |
| H | -5.06249 | -2.29148 | -1.63636 |
| H | -4.8391  | -2.83457 | 0.03618  |
| H | -1.69242 | 1.23052  | -0.15062 |
| H | -2.79524 | 1.32357  | 1.19741  |
| H | -3.06498 | 2.92649  | -0.87506 |
| H | -3.78008 | 1.55218  | -1.69342 |
| H | -4.80705 | 3.02875  | 0.775    |
| H | -5.63715 | 2.75176  | -0.75568 |
| H | -6.63106 | 1.18253  | 0.75523  |
| H | -5.10034 | 0.75837  | 1.49723  |
| H | -5.68238 | 0.13522  | -1.43908 |
| H | -6.20276 | -0.91004 | -0.11820 |

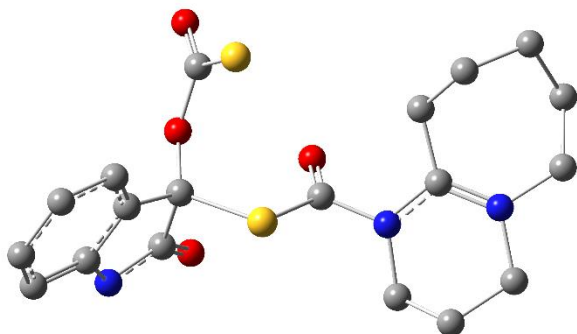

### INT8

|   |         |          |          |
|---|---------|----------|----------|
| C | 4.74488 | 0.55692  | -2.30271 |
| C | 5.6231  | -0.45684 | -1.92367 |
| C | 5.36326 | -1.26456 | -0.81384 |
| C | 4.20151 | -1.01384 | -0.1008  |
| C | 3.31077 | 0.00703  | -0.46276 |
| C | 3.57392 | 0.79291  | -1.57508 |
| C | 2.55669 | -1.17234 | 1.49331  |
| C | 2.15733 | -0.01166 | 0.52233  |
| O | 1.98786 | 1.08456  | 1.34638  |
| O | 1.92789 | -1.53412 | 2.46066  |
| C | 1.46756 | 2.36311  | 1.03518  |
| O | 1.54161 | 3.1143   | 1.98234  |
| S | 0.82784 | 2.69413  | -0.5334  |
| H | 4.96835 | 1.16747  | -3.17101 |

|   |          |          |          |
|---|----------|----------|----------|
| H | 6.52671  | -0.62869 | -2.50017 |
| H | 6.04009  | -2.05853 | -0.51726 |
| H | 2.87805  | 1.57464  | -1.8579  |
| N | 3.73162  | -1.68808 | 1.03012  |
| H | 4.20993  | -2.45795 | 1.48265  |
| C | -2.76377 | -3.08125 | -0.81888 |
| C | -1.8621  | -2.60611 | 0.29979  |
| N | -1.82839 | -1.13259 | 0.25517  |
| C | -2.91291 | -0.39251 | -0.05429 |
| N | -4.03344 | -0.98856 | -0.40579 |
| C | -4.12498 | -2.44888 | -0.63143 |
| C | -2.73354 | 1.11076  | -0.03079 |
| C | -3.60493 | 1.89887  | -1.00958 |
| C | -4.99843 | 2.18234  | -0.45539 |
| C | -5.5893  | 0.93664  | 0.20179  |
| C | -5.34969 | -0.33024 | -0.60664 |
| C | -0.62994 | -0.48363 | 0.75754  |
| O | -0.62696 | 0.12149  | 1.7887   |
| S | 0.67703  | -0.66195 | -0.40786 |
| H | -2.86488 | -4.1673  | -0.78792 |
| H | -2.33438 | -2.79747 | -1.78409 |
| H | -2.23903 | -2.91958 | 1.27849  |
| H | -0.8391  | -2.96612 | 0.18624  |
| H | -4.74568 | -2.58279 | -1.5204  |
| H | -4.65115 | -2.8823  | 0.22483  |
| H | -1.68328 | 1.30745  | -0.26745 |
| H | -2.87947 | 1.45652  | 0.99929  |
| H | -3.08819 | 2.83691  | -1.23046 |
| H | -3.67102 | 1.3525   | -1.95681 |
| H | -4.94937 | 2.99196  | 0.28014  |
| H | -5.65051 | 2.5206   | -1.26729 |
| H | -6.67103 | 1.04846  | 0.31693  |
| H | -5.18489 | 0.79386  | 1.2099   |
| H | -5.48562 | -0.15928 | -1.68038 |
| H | -6.07185 | -1.09105 | -0.30294 |

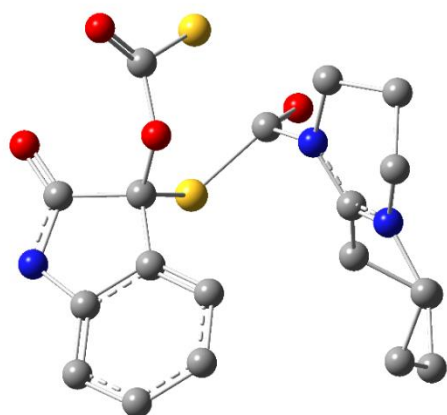

**TS8-9**

|   |          |         |         |
|---|----------|---------|---------|
| C | -0.31726 | 3.32296 | 1.18391 |
| C | 0.58595  | 4.32725 | 0.83637 |

|   |          |          |          |
|---|----------|----------|----------|
| C | 1.81176  | 4.02826  | 0.23478  |
| C | 2.09108  | 2.69328  | -0.01172 |
| C | 1.18146  | 1.67859  | 0.30438  |
| C | -0.0214  | 1.9819   | 0.91645  |
| C | 3.21909  | 0.77012  | -0.54939 |
| C | 1.77677  | 0.36249  | -0.11879 |
| O | 4.11235  | -0.00002 | -0.82006 |
| C | 2.48977  | -1.73391 | 0.90742  |
| O | 3.37914  | -1.93124 | 1.6911   |
| H | -1.25435 | 3.58069  | 1.66667  |
| H | 0.34101  | 5.3638   | 1.04493  |
| H | 2.52421  | 4.80587  | -0.01838 |
| H | -0.7164  | 1.19563  | 1.19695  |
| N | 3.25748  | 2.13481  | -0.55553 |
| H | 4.09759  | 2.65962  | -0.7691  |
| O | 1.81823  | -0.51091 | 0.97816  |
| S | 1.81702  | -2.8921  | -0.2044  |
| C | 0.0591   | -1.83169 | -1.1163  |
| O | -0.33803 | -2.56207 | -2.00988 |
| S | 0.9692   | -0.29074 | -1.66588 |
| C | -2.12956 | -2.45572 | 1.95464  |
| C | -0.81946 | -2.45448 | 1.20304  |
| N | -0.88315 | -1.54602 | 0.0384   |
| C | -1.91433 | -0.69676 | -0.14812 |
| N | -2.69171 | -0.35803 | 0.87465  |
| C | -2.54354 | -1.02172 | 2.17907  |
| C | -2.19896 | -0.15776 | -1.53892 |
| C | -3.69222 | 0.00096  | -1.85944 |
| C | -4.21101 | 1.38649  | -1.48157 |
| C | -3.67311 | 1.80244  | -0.11588 |
| C | -3.74836 | 0.68557  | 0.91264  |
| H | -1.99597 | -2.96843 | 2.90884  |
| H | -2.9056  | -2.9763  | 1.38515  |
| H | -0.00509 | -2.13713 | 1.85878  |
| H | -0.59122 | -3.44873 | 0.819    |
| H | -3.50877 | -0.95787 | 2.68319  |
| H | -1.80137 | -0.47707 | 2.77568  |
| H | -1.75868 | -0.85931 | -2.24203 |
| H | -1.67008 | 0.79193  | -1.66646 |
| H | -3.82934 | -0.17523 | -2.92938 |
| H | -4.26568 | -0.77637 | -1.3425  |
| H | -3.90083 | 2.11934  | -2.23387 |
| H | -5.306   | 1.37911  | -1.46681 |
| H | -4.25475 | 2.63876  | 0.28326  |
| H | -2.63884 | 2.15442  | -0.18877 |
| H | -4.72121 | 0.18035  | 0.87681  |
| H | -3.64481 | 1.12137  | 1.90973  |



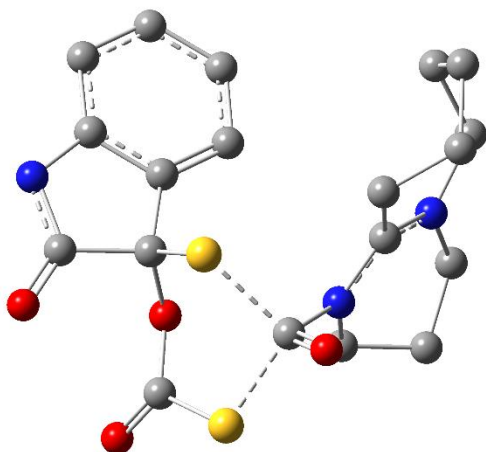

### INT9

|   |          |          |          |
|---|----------|----------|----------|
| C | -0.18382 | 3.27275  | 1.21615  |
| C | 0.74546  | 4.26773  | 0.91251  |
| C | 1.9682   | 3.9629   | 0.30773  |
| C | 2.22112  | 2.63111  | 0.01796  |
| C | 1.28988  | 1.62554  | 0.29921  |
| C | 0.08499  | 1.9356   | 0.9053   |
| C | 3.29381  | 0.70806  | -0.62048 |
| C | 1.85486  | 0.31572  | -0.17898 |
| O | 4.15811  | -0.07688 | -0.94105 |
| C | 2.43771  | -1.84856 | 0.80902  |
| O | 3.35661  | -2.21532 | 1.48657  |
| H | -1.12083 | 3.53528  | 1.69636  |
| H | 0.52118  | 5.30181  | 1.15407  |
| H | 2.69657  | 4.73401  | 0.08137  |
| H | -0.63564 | 1.15816  | 1.14396  |
| N | 3.37226  | 2.06872  | -0.55445 |
| H | 4.21952  | 2.58386  | -0.76251 |
| O | 1.95808  | -0.57289 | 0.92921  |
| S | 1.52143  | -2.95798 | -0.21583 |
| C | 0.03543  | -1.93451 | -0.94577 |
| O | -0.49623 | -2.59840 | -1.84311 |
| S | 0.99247  | -0.35104 | -1.6555  |
| C | -2.05058 | -2.17469 | 2.20341  |
| C | -0.71012 | -1.84219 | 1.58312  |
| N | -0.90457 | -1.4272  | 0.18239  |
| C | -1.9763  | -0.67307 | -0.1213  |
| N | -2.82844 | -0.29509 | 0.83557  |
| C | -2.87883 | -0.91856 | 2.17074  |
| C | -2.20423 | -0.23553 | -1.55564 |
| C | -3.66436 | -0.0119  | -1.96099 |
| C | -4.11826 | 1.41891  | -1.68082 |
| C | -3.64933 | 1.85654  | -0.29586 |
| C | -3.85699 | 0.77197  | 0.74902  |
| H | -1.91477 | -2.50348 | 3.2354   |
| H | -2.53223 | -2.97996 | 1.64096  |
| H | -0.22162 | -1.0319  | 2.13576  |

|   |          |          |          |
|---|----------|----------|----------|
| H | -0.06333 | -2.71307 | 1.59884  |
| H | -3.93292 | -1.11878 | 2.38331  |
| H | -2.51548 | -0.18871 | 2.90248  |
| H | -1.76764 | -1.00889 | -2.1808  |
| H | -1.61072 | 0.66952  | -1.72455 |
| H | -3.75827 | -0.23483 | -3.0271  |
| H | -4.30846 | -0.72833 | -1.43922 |
| H | -3.70987 | 2.09587  | -2.43874 |
| H | -5.20988 | 1.4815   | -1.74315 |
| H | -4.20718 | 2.73702  | 0.03602  |
| H | -2.59274 | 2.14649  | -0.30746 |
| H | -4.83722 | 0.29449  | 0.6309   |
| H | -3.8401  | 1.23016  | 1.74189  |

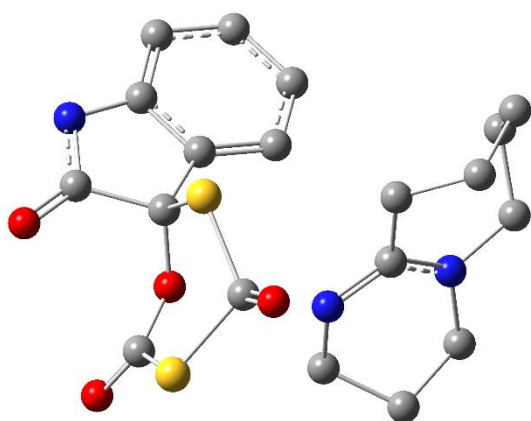

**TS9-10**

|   |          |          |          |
|---|----------|----------|----------|
| C | 0.01179  | 3.39985  | -1.03571 |
| C | -1.03173 | 4.30284  | -0.8266  |
| C | -2.27527 | 3.88705  | -0.34245 |
| C | -2.43266 | 2.53607  | -0.07608 |
| C | -1.38964 | 1.6255   | -0.26896 |
| C | -0.16056 | 2.04228  | -0.75011 |
| C | -3.37601 | 0.52004  | 0.47192  |
| C | -1.87418 | 0.26812  | 0.1493   |
| O | -4.17812 | -0.35338 | 0.71645  |
| C | -2.24358 | -1.90759 | -0.89059 |
| O | -2.99273 | -2.3365  | -1.71901 |
| H | 0.96253  | 3.7531   | -1.4207  |
| H | -0.87974 | 5.35462  | -1.04712 |
| H | -3.0874  | 4.58882  | -0.18732 |
| H | 0.64508  | 1.32932  | -0.90793 |
| N | -3.57576 | 1.86439  | 0.39054  |
| H | -4.4824  | 2.29791  | 0.52166  |
| O | -1.80618 | -0.62    | -0.94915 |
| S | -1.49639 | -2.98448 | 0.30389  |
| C | -0.29341 | -1.91341 | 1.22692  |
| O | 0.32729  | -2.49999 | 2.08796  |
| S | -1.03882 | -0.29214 | 1.69766  |
| C | 2.19117  | -2.18027 | -2.17231 |
| C | 0.84394  | -1.77714 | -1.59599 |

|   |         |          |          |
|---|---------|----------|----------|
| N | 0.99766 | -1.33307 | -0.2145  |
| C | 2.04671 | -0.59704 | 0.07112  |
| N | 2.96384 | -0.24615 | -0.8686  |
| C | 3.06776 | -0.95022 | -2.15467 |
| C | 2.22254 | -0.12583 | 1.50525  |
| C | 3.66542 | 0.09375  | 1.96771  |
| C | 4.1524  | 1.50815  | 1.65667  |
| C | 3.75579 | 1.91304  | 0.23813  |
| C | 3.99885 | 0.79932  | -0.77031 |
| H | 2.08687 | -2.54778 | -3.19565 |
| H | 2.62576 | -2.9781  | -1.56172 |
| H | 0.41003 | -0.96918 | -2.20111 |
| H | 0.15522 | -2.62168 | -1.62513 |
| H | 4.12218 | -1.20914 | -2.30229 |
| H | 2.7799  | -0.25901 | -2.95631 |
| H | 1.75052 | -0.88199 | 2.12875  |
| H | 1.63781 | 0.7917   | 1.63925  |
| H | 3.71993 | -0.09115 | 3.04428  |
| H | 4.32054 | -0.64636 | 1.49405  |
| H | 3.72215 | 2.21601  | 2.37379  |
| H | 5.24124 | 1.55858  | 1.76687  |
| H | 4.33679 | 2.78312  | -0.08179 |
| H | 2.70156 | 2.21081  | 0.19439  |
| H | 4.97358 | 0.32526  | -0.58929 |
| H | 4.04291 | 1.23675  | -1.77323 |

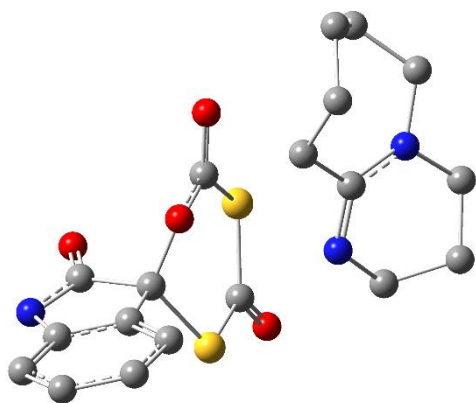

### INT10

|   |          |          |          |
|---|----------|----------|----------|
| C | -3.10399 | 2.84097  | 1.6785   |
| C | -4.38256 | 2.90303  | 1.12248  |
| C | -4.81939 | 1.9797   | 0.1672   |
| C | -3.924   | 0.9943   | -0.21324 |
| C | -2.6421  | 0.9272   | 0.33921  |
| C | -2.2142  | 1.83522  | 1.2916   |
| C | -2.96536 | -0.77904 | -1.3083  |
| C | -1.93985 | -0.25623 | -0.25597 |
| O | -2.74513 | -1.66271 | -2.10608 |
| C | 0.08702  | -0.67912 | -1.52876 |
| O | 0.81294  | -0.27309 | -2.39136 |
| H | -2.80055 | 3.57481  | 2.41671  |

|   |          |          |          |
|---|----------|----------|----------|
| H | -5.06168 | 3.68865  | 1.43786  |
| H | -5.81414 | 2.03247  | -0.26084 |
| H | -1.21628 | 1.75738  | 1.71441  |
| N | -4.09402 | -0.03762 | -1.14926 |
| H | -4.91706 | -0.16037 | -1.72861 |
| O | -0.75893 | 0.15345  | -0.9099  |
| S | 0.25987  | -2.40887 | -1.09804 |
| C | -0.74428 | -2.73648 | 0.34905  |
| O | -0.65848 | -3.82107 | 0.85427  |
| S | -1.72912 | -1.46692 | 1.09647  |
| C | 3.12279  | -1.00459 | 2.63409  |
| C | 1.67804  | -1.03404 | 2.15335  |
| N | 1.35432  | 0.16056  | 1.38659  |
| C | 2.27839  | 0.6464   | 0.61883  |
| N | 3.53488  | 0.11199  | 0.47676  |
| C | 4.01487  | -0.91029 | 1.4113   |
| C | 1.90349  | 1.92274  | -0.12306 |
| C | 3.04115  | 2.9224   | -0.34362 |
| C | 3.8124   | 2.62445  | -1.63042 |
| C | 4.06952  | 1.12587  | -1.79248 |
| C | 4.55997  | 0.46347  | -0.51147 |
| H | 3.37875  | -1.89765 | 3.21014  |
| H | 3.27149  | -0.13024 | 3.2773   |
| H | 1.53405  | -1.94194 | 1.54583  |
| H | 0.98158  | -1.1068  | 2.99524  |
| H | 5.03968  | -0.6463  | 1.69922  |
| H | 4.06158  | -1.87923 | 0.89466  |
| H | 1.10756  | 2.36569  | 0.47838  |
| H | 1.44872  | 1.66181  | -1.08603 |
| H | 2.63159  | 3.93626  | -0.38372 |
| H | 3.72073  | 2.89684  | 0.51674  |
| H | 3.24317  | 2.98714  | -2.4941  |
| H | 4.7657   | 3.16513  | -1.62555 |
| H | 4.82908  | 0.9638   | -2.56363 |
| H | 3.16494  | 0.60859  | -2.13129 |
| H | 5.33285  | 1.08771  | -0.0367  |
| H | 5.04528  | -0.48388 | -0.77458 |

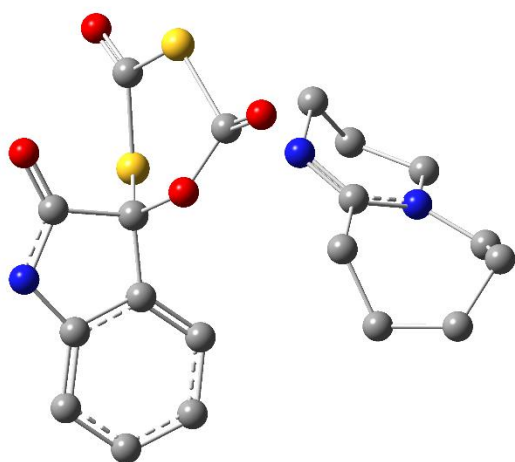

**TS10-11**

|   |          |          |          |
|---|----------|----------|----------|
| C | -0.53193 | 3.5149   | 1.29621  |
| C | -1.68368 | 4.25903  | 1.03812  |
| C | -2.80538 | 3.69071  | 0.42657  |
| C | -2.72802 | 2.35165  | 0.07773  |
| C | -1.5783  | 1.598    | 0.33162  |
| C | -0.47386 | 2.16268  | 0.94547  |
| C | -3.24744 | 0.28123  | -0.77312 |
| C | -1.80757 | 0.19922  | -0.17495 |
| O | -3.83151 | -0.62688 | -1.31982 |
| C | -0.22519 | -1.29083 | -1.4114  |
| O | 0.39907  | -1.40706 | -2.4418  |
| H | 0.3207   | 3.98573  | 1.7734   |
| H | -1.71523 | 5.3071   | 1.31847  |
| H | -3.69892 | 4.27236  | 0.22816  |
| H | 0.41055  | 1.56445  | 1.14867  |
| N | -3.69222 | 1.55167  | -0.55015 |
| H | -4.60461 | 1.87604  | -0.84906 |
| O | -0.92029 | -0.10914 | -1.21679 |
| S | -1.19141 | -2.83322 | -0.98187 |
| C | -2.07383 | -2.51278 | 0.51982  |
| O | -2.69588 | -3.37852 | 1.0737   |
| S | -1.87816 | -0.89802 | 1.28846  |
| C | 1.9858   | -1.77297 | 2.23932  |
| C | 1.2813   | -2.26755 | 0.98813  |
| N | 1.11247  | -1.16683 | 0.04754  |
| C | 2.13181  | -0.35552 | -0.12234 |
| N | 3.2713   | -0.44947 | 0.60897  |
| C | 3.34962  | -1.26989 | 1.82613  |
| C | 1.99422  | 0.74346  | -1.163   |
| C | 2.71554  | 2.0554   | -0.8414  |
| C | 4.1546   | 2.05484  | -1.35411 |
| C | 4.83803  | 0.72651  | -1.03426 |
| C | 4.54993  | 0.2498   | 0.38229  |
| H | 2.09313  | -2.57289 | 2.97544  |
| H | 1.39372  | -0.96846 | 2.68917  |
| H | 1.86475  | -3.07433 | 0.52185  |

|   |         |          |          |
|---|---------|----------|----------|
| H | 0.30872 | -2.68231 | 1.24695  |
| H | 3.79869 | -0.65102 | 2.61085  |
| H | 4.02975 | -2.10922 | 1.63654  |
| H | 0.92946 | 0.93043  | -1.2647  |
| H | 2.31841 | 0.34751  | -2.13171 |
| H | 2.1571  | 2.88295  | -1.28926 |
| H | 2.70066 | 2.22642  | 0.24202  |
| H | 4.16377 | 2.21969  | -2.43723 |
| H | 4.71243 | 2.87969  | -0.89725 |
| H | 5.92282 | 0.82907  | -1.13299 |
| H | 4.53474 | -0.05306 | -1.74117 |
| H | 4.63082 | 1.08614  | 1.09064  |
| H | 5.31574 | -0.47861 | 0.66776  |

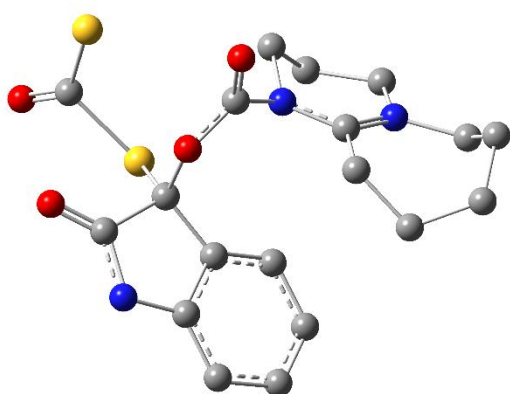

### INT11

|   |          |          |          |
|---|----------|----------|----------|
| C | 1.30311  | 2.70881  | 1.61141  |
| C | 0.91819  | 3.96712  | 1.15062  |
| C | -0.20889 | 4.1291   | 0.34245  |
| C | -0.91373 | 2.98787  | -0.0089  |
| C | -0.50719 | 1.70832  | 0.39505  |
| C | 0.58257  | 1.56879  | 1.24217  |
| C | -2.59995 | 1.63369  | -0.7761  |
| C | -1.5136  | 0.70708  | -0.13367 |
| O | -3.64976 | 1.27515  | -1.25207 |
| C | -0.23363 | -1.02908 | -1.40361 |
| O | -0.12948 | -1.66012 | -2.41509 |
| H | 2.16228  | 2.61086  | 2.2664   |
| H | 1.48819  | 4.84329  | 1.44286  |
| H | -0.5383  | 5.10974  | 0.01654  |
| H | 0.86242  | 0.59662  | 1.63591  |
| N | -2.11101 | 2.90898  | -0.72264 |
| H | -2.63876 | 3.70998  | -1.04868 |
| O | -1.08469 | -0.01375 | -1.31418 |
| S | -3.28501 | -2.34043 | -0.79066 |
| C | -3.62803 | -1.36666 | 0.56132  |
| O | -4.58821 | -1.3111  | 1.2886   |
| S | -2.18894 | -0.24557 | 1.24566  |
| C | 0.84626  | -2.4401  | 1.85287  |
| C | 0.23108  | -2.55408 | 0.47595  |
| N | 0.59381  | -1.32192 | -0.25467 |

|   |          |          |          |
|---|----------|----------|----------|
| C | 1.87658  | -0.89387 | -0.26736 |
| N | 2.73302  | -1.36938 | 0.60949  |
| C | 2.34637  | -2.29513 | 1.70186  |
| C | 2.22559  | 0.14547  | -1.30954 |
| C | 3.34283  | 1.12658  | -0.9495  |
| C | 4.73029  | 0.5575   | -1.22928 |
| C | 4.84651  | -0.87923 | -0.72153 |
| C | 4.19212  | -1.08614 | 0.63844  |
| H | 0.63429  | -3.33596 | 2.4395   |
| H | 0.41351  | -1.5787  | 2.36953  |
| H | 0.62424  | -3.41737 | -0.07267 |
| H | -0.85706 | -2.6092  | 0.50385  |
| H | 2.80209  | -1.90035 | 2.61349  |
| H | 2.81367  | -3.2579  | 1.47472  |
| H | 1.31074  | 0.71163  | -1.49925 |
| H | 2.45591  | -0.39142 | -2.23889 |
| H | 3.18235  | 2.04187  | -1.52532 |
| H | 3.24842  | 1.40692  | 0.10416  |
| H | 4.93501  | 0.58014  | -2.30465 |
| H | 5.4821   | 1.187    | -0.74243 |
| H | 5.89898  | -1.1591  | -0.62396 |
| H | 4.40403  | -1.58494 | -1.43323 |
| H | 4.36427  | -0.23848 | 1.31063  |
| H | 4.62233  | -1.97004 | 1.11212  |

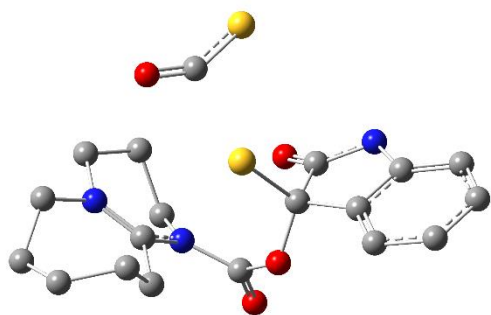

**TS 11-4**

|   |          |          |          |
|---|----------|----------|----------|
| C | 4.47386  | 2.40123  | -0.83605 |
| C | 5.42531  | 1.39102  | -0.69466 |
| C | 5.07155  | 0.11449  | -0.24632 |
| C | 3.73729  | -0.10544 | 0.05637  |
| C | 2.77178  | 0.89595  | -0.09324 |
| C | 3.1285   | 2.15443  | -0.54209 |
| C | 1.81487  | -1.06525 | 0.8404   |
| C | 1.42559  | 0.30649  | 0.24052  |
| O | 1.08204  | -1.78516 | 1.48939  |
| C | -0.07559 | 0.61629  | 2.15805  |
| O | 0.09095  | 0.66727  | 3.34657  |
| H | 4.77882  | 3.38397  | -1.17977 |
| H | 6.46417  | 1.59604  | -0.93323 |
| H | 5.81059  | -0.67104 | -0.12971 |
| H | 2.3777   | 2.93043  | -0.66108 |
| N | 3.13143  | -1.27083 | 0.551    |

|   |          |          |          |
|---|----------|----------|----------|
| H | 3.63678  | -2.09024 | 0.86622  |
| O | 0.84229  | 1.11307  | 1.30746  |
| S | 0.57161  | -3.20435 | -1.588   |
| C | -0.45697 | -1.97708 | -1.88504 |
| O | -1.46286 | -1.60652 | -2.37195 |
| S | 0.40267  | 0.14228  | -1.2402  |
| C | -2.04904 | -2.18668 | 1.24941  |
| C | -1.73457 | -1.16504 | 2.32004  |
| N | -1.258   | 0.04529  | 1.62326  |
| C | -2.01159 | 0.56819  | 0.61414  |
| N | -2.96724 | -0.16933 | 0.09537  |
| C | -3.13589 | -1.6174  | 0.36608  |
| C | -1.84342 | 2.03892  | 0.30973  |
| C | -2.22464 | 2.51603  | -1.09256 |
| C | -3.71593 | 2.80816  | -1.2315  |
| C | -4.55407 | 1.69998  | -0.59444 |
| C | -3.99996 | 0.30566  | -0.86225 |
| H | -2.40376 | -3.1192  | 1.69355  |
| H | -1.13243 | -2.38825 | 0.69059  |
| H | -2.61933 | -0.9109  | 2.91281  |
| H | -0.93716 | -1.49661 | 2.97891  |
| H | -3.16997 | -2.11207 | -0.60792 |
| H | -4.11638 | -1.72384 | 0.8398   |
| H | -0.80367 | 2.28575  | 0.50361  |
| H | -2.43508 | 2.56283  | 1.07371  |
| H | -1.64281 | 3.41595  | -1.31031 |
| H | -1.90595 | 1.76362  | -1.81917 |
| H | -3.95927 | 3.7647   | -0.75689 |
| H | -3.96806 | 2.90162  | -2.29297 |
| H | -5.57522 | 1.72885  | -0.98451 |
| H | -4.63329 | 1.8405   | 0.48914  |
| H | -3.59241 | 0.20778  | -1.87388 |
| H | -4.80687 | -0.42174 | -0.76644 |

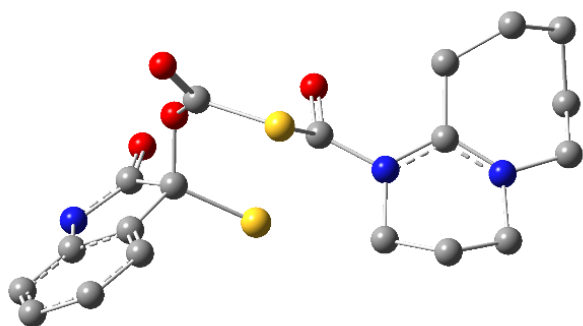

**TS9-12**

|   |         |          |          |
|---|---------|----------|----------|
| C | 4.65263 | 2.19522  | 0.65213  |
| C | 5.77898 | 1.74273  | -0.03404 |
| C | 5.746   | 0.56603  | -0.78703 |
| C | 4.55334 | -0.14076 | -0.8148  |
| C | 3.41384 | 0.29819  | -0.13066 |
| C | 3.45417 | 1.47589  | 0.59774  |



|   |          |          |          |
|---|----------|----------|----------|
| C | 2.99198  | -1.76564 | -1.26653 |
| C | 2.29178  | -0.68524 | -0.38732 |
| O | 2.49963  | -2.79813 | -1.65897 |
| C | 1.56873  | -0.81053 | 1.93293  |
| O | 2.10303  | -1.02836 | 2.98643  |
| H | 4.70201  | 3.11509  | 1.22487  |
| H | 6.70017  | 2.3152   | 0.01008  |
| H | 6.61773  | 0.2142   | -1.32847 |
| H | 2.56832  | 1.84125  | 1.10928  |
| N | 4.27058  | -1.33307 | -1.48904 |
| H | 4.94353  | -1.86355 | -2.02857 |
| O | 1.96708  | -1.43603 | 0.80974  |
| S | 0.17291  | 0.29162  | 1.84858  |
| C | -2.40948 | 2.87473  | -0.09512 |
| C | -1.33034 | 1.88713  | -0.4717  |
| N | -1.74185 | 0.53149  | -0.0606  |
| C | -3.04924 | 0.18101  | -0.05093 |
| N | -3.95869 | 1.02454  | -0.52006 |
| C | -3.67281 | 2.44573  | -0.79653 |
| C | -3.46092 | -1.12553 | 0.6095   |
| C | -4.88841 | -1.18154 | 1.1549   |
| C | -5.90611 | -1.56659 | 0.08618  |
| C | -5.66183 | -0.75776 | -1.18452 |
| C | -5.36221 | 0.70174  | -0.88337 |
| C | -0.68258 | -0.43427 | 0.31022  |
| O | -0.88139 | -1.628   | 0.28676  |
| S | 0.88505  | 0.02851  | -1.28751 |
| H | -2.1268  | 3.87701  | -0.42125 |
| H | -2.55251 | 2.88767  | 0.99002  |
| H | -1.16016 | 1.89739  | -1.5529  |
| H | -0.38527 | 2.10725  | 0.02125  |
| H | -4.54249 | 3.00688  | -0.4451  |
| H | -3.59128 | 2.57902  | -1.88034 |
| H | -2.76501 | -1.26126 | 1.43583  |
| H | -3.2626  | -1.95447 | -0.07542 |
| H | -4.89969 | -1.91447 | 1.96614  |
| H | -5.14966 | -0.21866 | 1.60734  |
| H | -5.83028 | -2.63615 | -0.1359  |
| H | -6.91923 | -1.38225 | 0.45864  |
| H | -6.54239 | -0.78414 | -1.83244 |
| H | -4.8348  | -1.17853 | -1.76691 |
| H | -6.02077 | 1.094    | -0.10004 |
| H | -5.53854 | 1.29664  | -1.78330 |

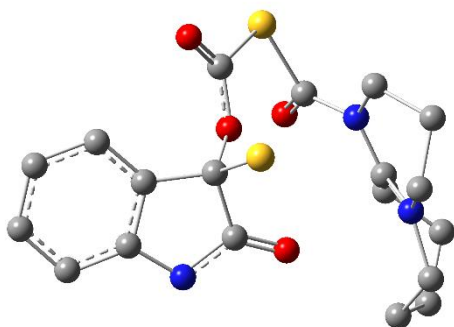

**INT 12**

|   |          |          |          |
|---|----------|----------|----------|
| C | -5.48342 | 0.41309  | 0.51515  |
| C | -5.45199 | 1.75334  | 0.8994   |
| C | -4.27238 | 2.49844  | 0.82251  |
| C | -3.13658 | 1.84914  | 0.36303  |
| C | -3.14715 | 0.50156  | -0.02167 |
| C | -4.3296  | -0.21899 | 0.03969  |
| C | -0.96326 | 1.43789  | -0.23846 |
| C | -1.77196 | 0.15027  | -0.54579 |
| O | 0.24031  | 1.58036  | -0.34705 |
| C | -1.40571 | -2.08573 | 0.37514  |
| O | -2.41815 | -2.617   | 0.01956  |
| H | -6.41254 | -0.14373 | 0.57959  |
| H | -6.35708 | 2.23148  | 1.26085  |
| H | -4.24105 | 3.544    | 1.11076  |
| H | -4.34743 | -1.25631 | -0.27411 |
| N | -1.85159 | 2.37985  | 0.19416  |
| H | -1.57724 | 3.31973  | 0.45224  |
| O | -1.06076 | -0.81463 | 0.33341  |
| S | -0.08823 | -3.07149 | 1.14556  |
| C | 2.3089   | -1.48189 | -2.27073 |
| C | 1.47238  | -2.03185 | -1.14231 |
| N | 1.82368  | -1.35227 | 0.13631  |
| C | 2.64014  | -0.22219 | 0.16262  |
| N | 2.77777  | 0.4778   | -0.92597 |
| C | 2.21419  | 0.02332  | -2.20965 |
| C | 3.41799  | 0.07292  | 1.42793  |
| C | 4.74767  | 0.80161  | 1.21681  |
| C | 4.56623  | 2.31488  | 1.1448   |
| C | 3.38701  | 2.66462  | 0.24199  |
| C | 3.36217  | 1.84214  | -1.03458 |
| C | 1.17459  | -1.74304 | 1.31221  |
| O | 1.36822  | -1.28433 | 2.40449  |
| S | -1.6889  | -0.25157 | -2.28885 |
| H | 1.89931  | -1.84555 | -3.21508 |
| H | 3.35296  | -1.80087 | -2.19705 |
| H | 0.42091  | -1.83756 | -1.36928 |
| H | 1.64115  | -3.0991  | -1.00151 |
| H | 2.80129  | 0.50168  | -2.99427 |
| H | 1.17152  | 0.36354  | -2.25565 |

|   |         |          |          |
|---|---------|----------|----------|
| H | 3.60358 | -0.89846 | 1.88627  |
| H | 2.77868 | 0.61649  | 2.13003  |
| H | 5.40384 | 0.53762  | 2.05023  |
| H | 5.23431 | 0.42794  | 0.30919  |
| H | 4.39221 | 2.71842  | 2.14771  |
| H | 5.48214 | 2.77676  | 0.76203  |
| H | 3.43404 | 3.7153   | -0.05839 |
| H | 2.42867 | 2.53123  | 0.75469  |
| H | 4.35454 | 1.74598  | -1.48846 |
| H | 2.70876 | 2.33034  | -1.76046 |

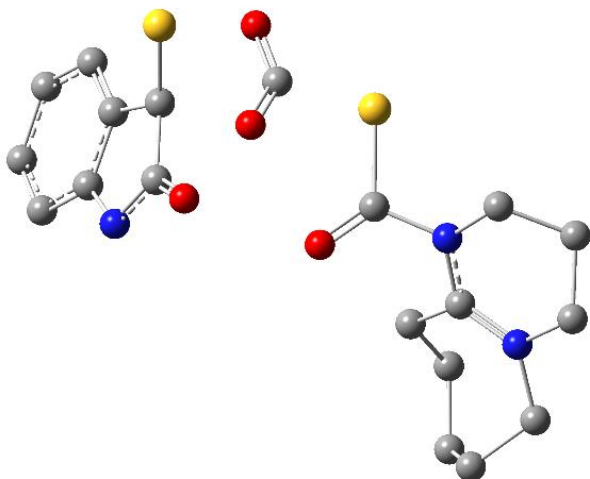

**TS12-S-isatiin**

|   |          |          |          |
|---|----------|----------|----------|
| C | 4.70743  | 2.10952  | -1.63931 |
| C | 4.3678   | 3.15769  | -0.78235 |
| C | 3.78092  | 2.92027  | 0.46397  |
| C | 3.53851  | 1.59981  | 0.81291  |
| C | 3.8681   | 0.53702  | -0.04055 |
| C | 4.46005  | 0.78498  | -1.26779 |
| C | 2.96194  | -0.27158 | 2.01892  |
| C | 3.50816  | -0.73925 | 0.64213  |
| O | 2.57759  | -0.96146 | 2.93519  |
| S | 4.44178  | -2.15055 | 0.54599  |
| H | 5.16639  | 2.3254   | -2.59839 |
| H | 4.56789  | 4.18159  | -1.08304 |
| H | 3.52852  | 3.734    | 1.13563  |
| H | 4.71193  | -0.04514 | -1.9189  |
| N | 2.99369  | 1.10116  | 1.99843  |
| H | 2.70486  | 1.66955  | 2.78439  |
| C | 1.65175  | -1.1834  | -1.17997 |
| O | 2.40205  | -1.27791 | -2.11616 |
| O | 1.81146  | -0.97825 | 0.05848  |
| S | -0.16924 | -1.50875 | -1.62576 |
| C | -4.17237 | -2.64644 | -0.18754 |
| C | -2.69413 | -2.37984 | -0.03932 |
| N | -2.43184 | -0.94213 | -0.2893  |
| C | -3.38145 | 0.02055  | -0.09834 |
| N | -4.54795 | -0.29536 | 0.41333  |

|   |          |          |          |
|---|----------|----------|----------|
| C | -4.92745 | -1.6943  | 0.70712  |
| C | -3.06492 | 1.41349  | -0.61252 |
| C | -4.26524 | 2.183    | -1.17247 |
| C | -5.01849 | 2.94305  | -0.08427 |
| C | -5.21509 | 2.06248  | 1.14681  |
| C | -5.63688 | 0.64562  | 0.79287  |
| C | -1.05954 | -0.54032 | -0.43049 |
| O | -0.61388 | 0.40148  | 0.16446  |
| H | -4.38754 | -3.67531 | 0.10506  |
| H | -4.47963 | -2.50876 | -1.22844 |
| H | -2.34428 | -2.62736 | 0.96741  |
| H | -2.12141 | -2.95732 | -0.76263 |
| H | -6.003   | -1.76264 | 0.53658  |
| H | -4.72855 | -1.88417 | 1.76665  |
| H | -2.32917 | 1.28232  | -1.40666 |
| H | -2.56589 | 1.98171  | 0.17763  |
| H | -3.89097 | 2.87768  | -1.92859 |
| H | -4.9354  | 1.49056  | -1.69344 |
| H | -4.462   | 3.8433   | 0.19611  |
| H | -5.99013 | 3.26773  | -0.47044 |
| H | -5.9961  | 2.477    | 1.79025  |
| H | -4.30485 | 2.02096  | 1.75432  |
| H | -6.38391 | 0.63119  | -0.00869 |
| H | -6.08695 | 0.17592  | 1.66975  |

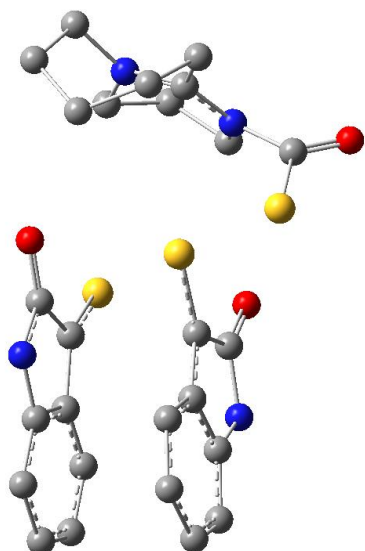

### INT13

|   |         |          |          |
|---|---------|----------|----------|
| C | 3.74428 | 0.18808  | 0.0525   |
| C | 3.14763 | -1.9845  | 0.92326  |
| H | 2.09344 | -2.03045 | 0.62227  |
| H | 3.58265 | -2.9812  | 0.85652  |
| N | 3.86483 | -1.12251 | -0.02706 |
| N | 3.12546 | 0.7511   | 1.10434  |
| C | 3.30306 | -1.39446 | 2.31437  |
| H | 4.3623  | -1.38102 | 2.58703  |
| H | 2.76642 | -2.00465 | 3.04412  |

|   |          |          |          |
|---|----------|----------|----------|
| C | 2.71752  | 0.00229  | 2.32386  |
| H | 3.07604  | 0.58201  | 3.17646  |
| H | 1.62267  | -0.01509 | 2.32835  |
| C | 4.66977  | -1.7391  | -1.09652 |
| H | 5.6084   | -1.1892  | -1.17983 |
| H | 4.91704  | -2.74612 | -0.76032 |
| C | 3.93635  | -1.77033 | -2.44248 |
| H | 3.28881  | -2.65168 | -2.48649 |
| H | 4.69459  | -1.88183 | -3.22472 |
| C | 3.08152  | -0.52601 | -2.68051 |
| H | 2.19532  | -0.59699 | -2.04183 |
| H | 2.71449  | -0.53747 | -3.71159 |
| C | 3.78273  | 0.81548  | -2.43666 |
| H | 3.05553  | 1.61335  | -2.61876 |
| H | 4.59342  | 0.95113  | -3.15905 |
| C | 4.37998  | 1.02874  | -1.02189 |
| H | 4.33661  | 2.08103  | -0.74464 |
| H | 5.44108  | 0.76227  | -1.01358 |
| C | -3.16046 | 1.61062  | 0.5554   |
| C | -2.20761 | 1.51486  | -0.49324 |
| C | -2.60953 | 1.78151  | -1.80374 |
| C | -3.93607 | 2.1404   | -2.04801 |
| C | -4.86166 | 2.22565  | -1.00178 |
| C | -4.4816  | 1.96429  | 0.31822  |
| C | -0.9697  | 1.09003  | 0.1088   |
| H | -1.89325 | 1.71145  | -2.61835 |
| H | -4.25551 | 2.35317  | -3.06377 |
| H | -5.88974 | 2.50274  | -1.21388 |
| H | -5.19557 | 2.02915  | 1.13395  |
| H | -2.95192 | 1.31948  | 2.6616   |
| S | 0.53644  | 0.92376  | -0.64655 |
| C | -1.17476 | 1.01305  | 1.54286  |
| O | -0.37857 | 0.76622  | 2.45518  |
| N | -2.52165 | 1.31245  | 1.74715  |
| C | 2.7318   | 2.1356   | 1.14081  |
| O | 3.07221  | 2.83154  | 2.05986  |
| S | 1.66551  | 2.7384   | -0.15182 |
| C | -2.9982  | -1.59524 | -0.99693 |
| C | -2.78539 | -1.76162 | 0.38581  |
| C | -3.86145 | -1.72303 | 1.2719   |
| C | -5.14053 | -1.53053 | 0.7612   |
| C | -5.33447 | -1.37351 | -0.61864 |
| C | -4.26949 | -1.4014  | -1.51968 |
| C | -1.36615 | -1.9671  | 0.59693  |
| H | -3.69029 | -1.84527 | 2.33769  |
| H | -5.99417 | -1.50027 | 1.42969  |
| H | -6.33991 | -1.22269 | -0.99994 |
| H | -4.42496 | -1.27351 | -2.5856  |
| H | -1.66768 | -1.61989 | -2.67432 |

|   |          |          |          |
|---|----------|----------|----------|
| S | -0.53054 | -2.26718 | 1.96057  |
| C | -0.74531 | -1.94027 | -0.80504 |
| O | 0.41337  | -2.14517 | -1.10713 |
| N | -1.78266 | -1.68246 | -1.67079 |

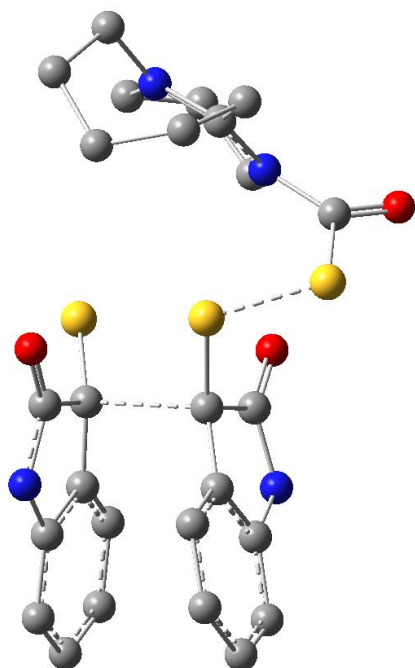

**TS13-14**

|   |         |          |          |
|---|---------|----------|----------|
| C | 3.67723 | 0.32213  | 0.03097  |
| C | 3.84337 | -1.29281 | 1.84414  |
| H | 2.87301 | -1.79985 | 1.82079  |
| H | 4.61495 | -2.00751 | 2.12626  |
| N | 4.15744 | -0.81904 | 0.48789  |
| N | 2.92283 | 1.11492  | 0.81989  |
| C | 3.81674 | -0.09594 | 2.77491  |
| H | 4.80687 | 0.36849  | 2.80277  |
| H | 3.5542  | -0.41452 | 3.78564  |
| C | 2.76756 | 0.87517  | 2.28386  |
| H | 2.86146 | 1.84786  | 2.76654  |
| H | 1.75833 | 0.48842  | 2.42961  |
| C | 5.03478 | -1.65441 | -0.35653 |
| H | 5.79567 | -1.01508 | -0.80704 |
| H | 5.5496  | -2.34162 | 0.31395  |
| C | 4.26087 | -2.41891 | -1.43381 |
| H | 3.81657 | -3.31868 | -0.99695 |
| H | 4.99112 | -2.74529 | -2.18178 |
| C | 3.15641 | -1.5826  | -2.08072 |
| H | 2.30524 | -1.52053 | -1.39417 |
| H | 2.78434 | -2.10548 | -2.96726 |
| C | 3.5812  | -0.1699  | -2.49553 |
| H | 2.72609 | 0.32269  | -2.97015 |
| H | 4.36931 | -0.22472 | -3.25283 |
| C | 4.09622 | 0.745    | -1.35357 |
| H | 3.81074 | 1.77802  | -1.53414 |
| H | 5.18963 | 0.74214  | -1.33079 |

|   |          |          |          |
|---|----------|----------|----------|
| C | -3.07715 | 1.62095  | 0.01706  |
| C | -2.31033 | 0.94388  | -0.95703 |
| C | -2.88177 | 0.64251  | -2.18937 |
| C | -4.21323 | 0.99548  | -2.42268 |
| C | -4.96525 | 1.63574  | -1.43367 |
| C | -4.40447 | 1.96264  | -0.19562 |
| C | -1.02657 | 0.61701  | -0.33978 |
| H | -2.30015 | 0.13043  | -2.95149 |
| H | -4.6699  | 0.76666  | -3.38029 |
| H | -6.00178 | 1.89215  | -1.62974 |
| H | -4.98122 | 2.46901  | 0.5719   |
| H | -2.55433 | 2.36529  | 1.95433  |
| S | 0.47832  | 0.48589  | -1.24526 |
| C | -1.0027  | 1.34979  | 0.94545  |
| O | -0.06126 | 1.51606  | 1.71144  |
| N | -2.27936 | 1.84452  | 1.13212  |
| C | 2.33912  | 2.34729  | 0.37518  |
| O | 2.53826  | 3.36767  | 0.9741   |
| S | 1.27531  | 2.40525  | -1.07633 |
| C | -3.39435 | -1.79074 | -0.07182 |
| C | -2.5953  | -1.32708 | 0.98594  |
| C | -3.18886 | -0.88971 | 2.16029  |
| C | -4.5835  | -0.89052 | 2.25233  |
| C | -5.36314 | -1.33203 | 1.18043  |
| C | -4.7796  | -1.79699 | -0.00198 |
| C | -1.17962 | -1.3963  | 0.56341  |
| H | -2.57003 | -0.54124 | 2.98258  |
| H | -5.06532 | -0.54532 | 3.16121  |
| H | -6.44547 | -1.32227 | 1.26621  |
| H | -5.38255 | -2.14996 | -0.8323  |
| H | -2.89732 | -2.56985 | -2.00314 |
| S | 0.11716  | -1.69907 | 1.60374  |
| C | -1.23873 | -2.02509 | -0.8302  |
| O | -0.31444 | -2.32467 | -1.56497 |
| N | -2.57034 | -2.20643 | -1.11686 |

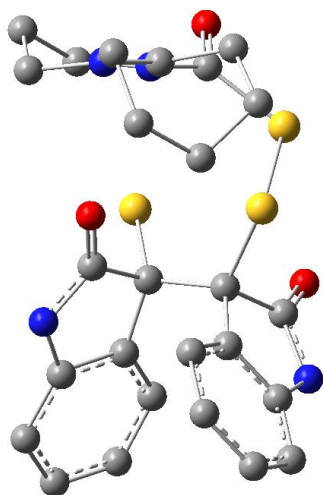

**INT 14**

|   |          |          |          |
|---|----------|----------|----------|
| C | 3.38943  | -0.01531 | -0.00242 |
| C | 3.53405  | -0.60276 | -2.37096 |
| H | 2.51669  | -0.45075 | -2.73979 |
| H | 4.2506   | -0.32944 | -3.14447 |
| N | 3.76018  | 0.29812  | -1.23028 |
| N | 2.82562  | -1.21491 | 0.25843  |
| C | 3.74081  | -2.02495 | -1.89377 |
| H | 4.77729  | -2.15791 | -1.56902 |
| H | 3.53987  | -2.72713 | -2.70532 |
| C | 2.77344  | -2.29875 | -0.76712 |
| H | 3.01994  | -3.22431 | -0.24853 |
| H | 1.73861  | -2.3422  | -1.10921 |
| C | 4.44186  | 1.57857  | -1.50299 |
| H | 5.2016   | 1.74441  | -0.73707 |
| H | 4.96294  | 1.46149  | -2.45249 |
| C | 3.45904  | 2.74612  | -1.54932 |
| H | 2.89537  | 2.72129  | -2.4876  |
| H | 4.05023  | 3.66803  | -1.54323 |
| C | 2.49698  | 2.70625  | -0.36263 |
| H | 1.73005  | 1.94785  | -0.55437 |
| H | 1.9778   | 3.66572  | -0.27437 |
| C | 3.1942   | 2.39012  | 0.96474  |
| H | 2.48821  | 2.55433  | 1.78252  |
| H | 4.01892  | 3.09324  | 1.11989  |
| C | 3.76035  | 0.94684  | 1.10061  |
| H | 3.49047  | 0.524    | 2.06401  |
| H | 4.85548  | 0.96596  | 1.08987  |
| C | -2.96173 | 1.75433  | 1.16003  |
| C | -1.84605 | 1.4341   | 0.37469  |
| C | -1.46849 | 2.2718   | -0.66668 |
| C | -2.23748 | 3.41161  | -0.9255  |
| C | -3.35666 | 3.70231  | -0.14687 |
| C | -3.73736 | 2.87732  | 0.91433  |
| C | -1.2386  | 0.14159  | 0.89789  |
| H | -0.58984 | 2.05305  | -1.26639 |
| H | -1.95681 | 4.07428  | -1.73703 |
| H | -3.94391 | 4.58949  | -0.36221 |
| H | -4.60152 | 3.10508  | 1.52909  |
| H | -3.8153  | 0.83064  | 2.88812  |
| S | 0.40222  | 0.72801  | 1.51701  |
| C | -2.13599 | -0.16707 | 2.12198  |
| O | -2.01596 | -1.06751 | 2.92279  |
| N | -3.11483 | 0.79767  | 2.15772  |
| C | 2.39998  | -1.66155 | 1.55135  |
| O | 2.7791   | -2.7161  | 1.98485  |
| S | 1.2857   | -0.74317 | 2.62732  |
| C | -2.7118  | -0.91479 | -2.04891 |
| C | -2.67202 | -1.18989 | -0.67635 |
| C | -3.82258 | -1.61805 | -0.03213 |



|   |          |          |          |
|---|----------|----------|----------|
| C | -5.00729 | -1.74034 | -0.76707 |
| C | -5.02779 | -1.45474 | -2.13201 |
| C | -3.87127 | -1.04168 | -2.79966 |
| C | -1.2532  | -0.99603 | -0.17028 |
| H | -3.79875 | -1.87609 | 1.02294  |
| H | -5.91506 | -2.06936 | -0.27172 |
| H | -5.95289 | -1.55967 | -2.69024 |
| H | -3.87674 | -0.82654 | -3.86324 |
| H | -1.19237 | -0.28318 | -3.42326 |
| S | -0.50024 | -2.6002  | 0.2813   |
| C | -0.53704 | -0.49765 | -1.44138 |
| O | 0.62132  | -0.11975 | -1.54577 |
| N | -1.43933 | -0.52428 | -2.4715  |

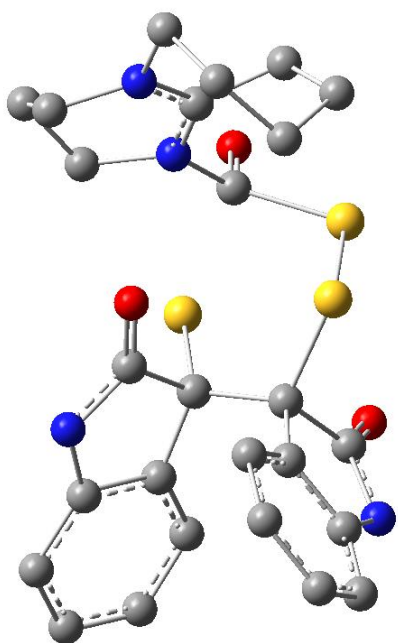

**TS14-15**

|   |         |          |          |
|---|---------|----------|----------|
| C | 3.40503 | -0.28996 | 0.08421  |
| C | 3.59618 | -1.22661 | -2.15066 |
| H | 2.64629 | -0.94223 | -2.61628 |
| H | 4.38364 | -1.22909 | -2.904   |
| N | 3.95893 | -0.24135 | -1.12923 |
| N | 2.47987 | -1.20507 | 0.3745   |
| C | 3.47079 | -2.56587 | -1.44974 |
| H | 4.42345 | -2.81971 | -0.97491 |
| H | 3.21568 | -3.35479 | -2.16011 |
| C | 2.35384 | -2.44086 | -0.43749 |
| H | 2.35499 | -3.268   | 0.27635  |
| H | 1.39536 | -2.42315 | -0.9502  |
| C | 4.92892 | 0.80765  | -1.48039 |
| H | 5.69143 | 0.87309  | -0.70172 |
| H | 5.43229 | 0.4803   | -2.39001 |
| C | 4.2589  | 2.16883  | -1.69075 |
| H | 3.79729 | 2.20254  | -2.68305 |
| H | 5.04784 | 2.92864  | -1.67146 |
| C | 3.19895 | 2.46519  | -0.62885 |

|   |          |          |          |
|---|----------|----------|----------|
| H | 2.30234  | 1.87026  | -0.84105 |
| H | 2.89772  | 3.51511  | -0.69953 |
| C | 3.65777  | 2.17217  | 0.80348  |
| H | 2.88013  | 2.50709  | 1.49699  |
| H | 4.55481  | 2.75682  | 1.03271  |
| C | 3.96119  | 0.68173  | 1.09767  |
| H | 3.63115  | 0.40358  | 2.09294  |
| H | 5.04033  | 0.50419  | 1.08206  |
| C | -3.17578 | 2.09585  | 0.42794  |
| C | -2.02529 | 1.62202  | -0.21772 |
| C | -1.69197 | 2.10634  | -1.47606 |
| C | -2.54129 | 3.03514  | -2.08698 |
| C | -3.69407 | 3.47544  | -1.43898 |
| C | -4.029   | 3.01504  | -0.1636  |
| C | -1.32492 | 0.63999  | 0.70461  |
| H | -0.78515 | 1.78098  | -1.97581 |
| H | -2.29522 | 3.41787  | -3.0716  |
| H | -4.34283 | 4.1958   | -1.9273  |
| H | -4.91723 | 3.36427  | 0.35178  |
| H | -4.00364 | 1.70877  | 2.36201  |
| S | 0.28985  | 1.44705  | 1.10089  |
| C | -2.23795 | 0.65355  | 1.95476  |
| O | -2.09395 | 0.0314   | 2.98461  |
| N | -3.27417 | 1.51301  | 1.6872   |
| C | 1.72386  | -1.30731 | 1.68307  |
| O | 2.15577  | -2.12873 | 2.49083  |
| S | 1.17996  | 0.28309  | 2.52888  |
| C | -2.62916 | -1.62208 | -1.60069 |
| C | -2.54531 | -1.38075 | -0.22386 |
| C | -3.60303 | -1.73102 | 0.60247  |
| C | -4.74742 | -2.29663 | 0.02964  |
| C | -4.81693 | -2.51809 | -1.34506 |
| C | -3.75127 | -2.18784 | -2.18644 |
| C | -1.18712 | -0.78014 | 0.08833  |
| H | -3.53839 | -1.58366 | 1.67613  |
| H | -5.58416 | -2.57117 | 0.66321  |
| H | -5.71067 | -2.96059 | -1.77365 |
| H | -3.79512 | -2.36676 | -3.2555  |
| H | -1.24409 | -1.29135 | -3.2026  |
| S | -0.2429  | -2.0126  | 1.08053  |
| C | -0.55016 | -0.68588 | -1.32133 |
| O | 0.5392   | -0.22407 | -1.61383 |
| N | -1.4426  | -1.21569 | -2.21228 |

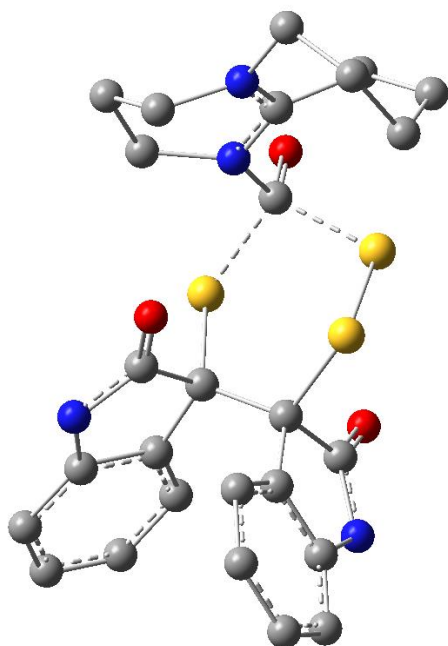

### INT 15

|   |          |          |          |
|---|----------|----------|----------|
| C | 3.53655  | -0.49676 | 0.08235  |
| C | 3.49222  | -1.08194 | -2.24143 |
| H | 2.56792  | -0.5574  | -2.51154 |
| H | 4.18554  | -1.05824 | -3.08114 |
| N | 4.12069  | -0.40567 | -1.1076  |
| N | 2.39738  | -1.1907  | 0.19918  |
| C | 3.17541  | -2.49554 | -1.77668 |
| H | 4.10167  | -2.97527 | -1.44783 |
| H | 2.74788  | -3.08975 | -2.58688 |
| C | 2.16165  | -2.38792 | -0.64977 |
| H | 2.20609  | -3.25268 | 0.01976  |
| H | 1.16318  | -2.31664 | -1.06471 |
| C | 5.35138  | 0.37249  | -1.29746 |
| H | 6.05996  | 0.11869  | -0.50574 |
| H | 5.79397  | 0.05107  | -2.24047 |
| C | 5.06975  | 1.87701  | -1.30453 |
| H | 4.64028  | 2.16788  | -2.26869 |
| H | 6.03261  | 2.39013  | -1.20696 |
| C | 4.12815  | 2.2985   | -0.17287 |
| H | 3.09667  | 2.03219  | -0.43945 |
| H | 4.14695  | 3.38813  | -0.0763  |
| C | 4.46641  | 1.66578  | 1.17914  |
| H | 3.83391  | 2.12435  | 1.94244  |
| H | 5.50603  | 1.89138  | 1.4393   |
| C | 4.26181  | 0.13106  | 1.25052  |
| H | 3.77467  | -0.16855 | 2.17382  |
| H | 5.2328   | -0.37757 | 1.25088  |
| C | -3.17537 | 2.27211  | 0.23609  |
| C | -2.15803 | 1.62817  | -0.48248 |
| C | -2.0082  | 1.88536  | -1.83953 |
| C | -2.90803 | 2.75462  | -2.46534 |

|   |          |          |          |
|---|----------|----------|----------|
| C | -3.92828 | 3.3647   | -1.73799 |
| C | -4.07534 | 3.13691  | -0.36813 |
| C | -1.34988 | 0.77883  | 0.48379  |
| H | -1.20349 | 1.43141  | -2.40797 |
| H | -2.80436 | 2.95779  | -3.52577 |
| H | -4.6182  | 4.03656  | -2.23883 |
| H | -4.85751 | 3.61951  | 0.2079   |
| H | -3.71908 | 2.24151  | 2.30457  |
| S | 0.32491  | 1.56825  | 0.52638  |
| C | -2.07771 | 1.02848  | 1.82822  |
| O | -1.82283 | 0.54498  | 2.91005  |
| N | -3.09943 | 1.90827  | 1.57625  |
| C | 1.61684  | -1.16513 | 1.50295  |
| O | 2.07646  | -1.85937 | 2.42536  |
| S | 1.30225  | 0.64675  | 2.07088  |
| C | -3.0324  | -1.77968 | -1.15891 |
| C | -2.7093  | -1.33687 | 0.1298   |
| C | -3.60754 | -1.53059 | 1.16973  |
| C | -4.83459 | -2.14358 | 0.89444  |
| C | -5.14357 | -2.56452 | -0.39813 |
| C | -4.24085 | -2.39302 | -1.45056 |
| C | -1.31828 | -0.72637 | 0.1043   |
| H | -3.35772 | -1.22305 | 2.18007  |
| H | -5.54806 | -2.29737 | 1.69697  |
| H | -6.09929 | -3.04027 | -0.59442 |
| H | -4.47056 | -2.72644 | -2.45691 |
| H | -1.94546 | -1.74277 | -3.00536 |
| S | -0.25195 | -1.82937 | 1.14344  |
| C | -0.93045 | -0.88508 | -1.38753 |
| O | 0.09893  | -0.52063 | -1.92499 |
| N | -1.97067 | -1.50567 | -2.02087 |

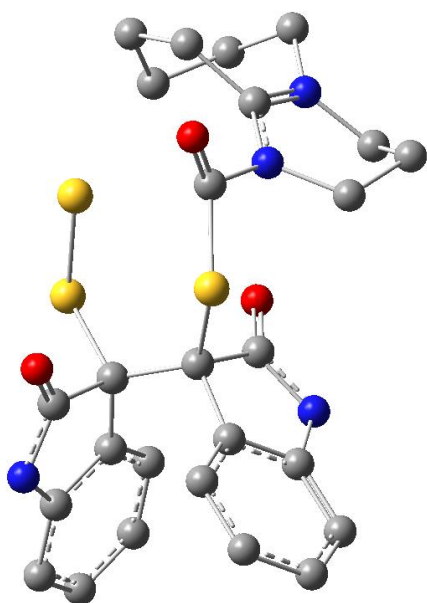

**TS15-16**

|   |         |         |          |
|---|---------|---------|----------|
| C | 3.51455 | 0.43755 | -0.19883 |
| C | 3.47744 | 1.67929 | 1.87134  |

|   |          |          |          |
|---|----------|----------|----------|
| H | 2.56514  | 1.26827  | 2.31625  |
| H | 4.20014  | 1.89817  | 2.65582  |
| N | 4.07089  | 0.68175  | 0.97633  |
| N | 2.42025  | 1.13196  | -0.56015 |
| C | 3.15973  | 2.89825  | 1.02407  |
| H | 4.07846  | 3.25819  | 0.55294  |
| H | 2.74453  | 3.70278  | 1.63385  |
| C | 2.13195  | 2.48895  | -0.01288 |
| H | 2.13202  | 3.17913  | -0.86118 |
| H | 1.13876  | 2.49424  | 0.42983  |
| C | 5.24973  | -0.07189 | 1.42791  |
| H | 5.95816  | -0.14729 | 0.60015  |
| H | 5.72687  | 0.51544  | 2.21262  |
| C | 4.85211  | -1.46008 | 1.92615  |
| H | 4.35189  | -1.37818 | 2.89671  |
| H | 5.77608  | -2.02829 | 2.07891  |
| C | 3.94802  | -2.17503 | 0.91755  |
| H | 2.91723  | -1.80909 | 1.00502  |
| H | 3.91717  | -3.24346 | 1.15147  |
| C | 4.41408  | -1.98313 | -0.52717 |
| H | 3.86606  | -2.67917 | -1.163   |
| H | 5.4787   | -2.23153 | -0.60069 |
| C | 4.19192  | -0.55995 | -1.10799 |
| H | 3.64909  | -0.60755 | -2.04585 |
| H | 5.15582  | -0.08751 | -1.3384  |
| C | -3.63826 | -1.84933 | 0.15008  |
| C | -2.44815 | -1.36623 | 0.71071  |
| C | -2.2803  | -1.37702 | 2.08856  |
| C | -3.33256 | -1.82799 | 2.89278  |
| C | -4.51914 | -2.28065 | 2.31805  |
| C | -4.68924 | -2.30614 | 0.93175  |
| C | -1.50137 | -0.98411 | -0.41299 |
| H | -1.34579 | -1.05626 | 2.53811  |
| H | -3.21789 | -1.8334  | 3.97143  |
| H | -5.32535 | -2.63032 | 2.95533  |
| H | -5.6038  | -2.67332 | 0.47852  |
| H | -4.27483 | -2.09373 | -1.87738 |
| S | -0.13927 | -2.22822 | -0.29019 |
| C | -2.35358 | -1.27241 | -1.66922 |
| O | -2.05891 | -1.07827 | -2.82965 |
| N | -3.55177 | -1.79044 | -1.23687 |
| C | 1.65832  | 0.82558  | -1.77321 |
| O | 2.18178  | 0.92062  | -2.86178 |
| S | 1.24952  | -1.69816 | -1.71094 |
| C | -2.35169 | 2.11507  | 0.89048  |
| C | -2.32995 | 1.40015  | -0.31241 |
| C | -3.32771 | 1.59538  | -1.25625 |
| C | -4.35824 | 2.4954   | -0.9638  |
| C | -4.37317 | 3.18697  | 0.24619  |

|   |          |         |          |
|---|----------|---------|----------|
| C | -3.36371 | 3.01098 | 1.1965   |
| C | -1.09411 | 0.51362 | -0.33153 |
| H | -3.30673 | 1.07091 | -2.20673 |
| H | -5.14911 | 2.65709 | -1.68818 |
| H | -5.18069 | 3.88071 | 0.45744  |
| H | -3.36658 | 3.55287 | 2.13599  |
| H | -1.0348  | 2.12445 | 2.58011  |
| S | -0.12227 | 1.25839 | -1.73379 |
| C | -0.45402 | 0.82404 | 1.04476  |
| O | 0.54259  | 0.32009 | 1.52141  |
| N | -1.2362  | 1.76839 | 1.65302  |

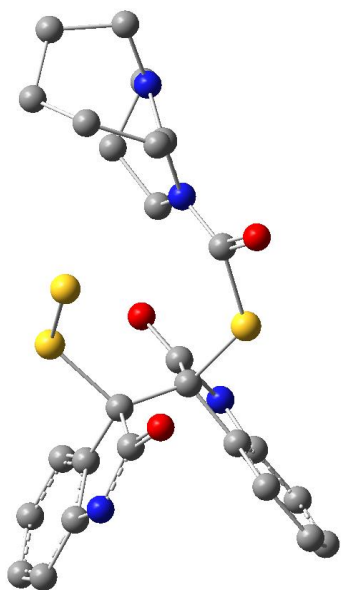

### INT 16

|   |         |          |          |
|---|---------|----------|----------|
| C | 3.78668 | 0.74763  | -0.23084 |
| C | 4.24149 | 1.13913  | 2.11715  |
| H | 5.04225 | 0.80735  | 2.77764  |
| H | 4.1173  | 2.22232  | 2.21892  |
| N | 4.66051 | 0.83638  | 0.74016  |
| N | 2.47856 | 1.05139  | 0.04259  |
| C | 2.9403  | 0.40307  | 2.37414  |
| H | 2.58708 | 0.58631  | 3.39021  |
| H | 3.1069  | -0.67238 | 2.25305  |
| C | 1.90076 | 0.8985   | 1.39363  |
| H | 1.50678 | 1.86913  | 1.70369  |
| H | 1.08844 | 0.17986  | 1.31302  |
| C | 6.07334 | 0.48247  | 0.52257  |
| H | 6.36714 | 0.84637  | -0.46303 |
| H | 6.65214 | 1.02964  | 1.26736  |
| C | 6.26786 | -1.02705 | 0.63022  |
| H | 6.20747 | -1.33966 | 1.6779   |
| H | 7.28022 | -1.24965 | 0.27748  |
| C | 5.22686 | -1.76851 | -0.21132 |
| H | 4.27266 | -1.82715 | 0.32442  |
| H | 5.55448 | -2.80008 | -0.36947 |
| C | 4.98757 | -1.11165 | -1.57341 |

|   |          |          |          |
|---|----------|----------|----------|
| H | 4.39703  | -1.79891 | -2.1839  |
| H | 5.94912  | -0.97859 | -2.08051 |
| C | 4.23302  | 0.25591  | -1.5866  |
| H | 3.35376  | 0.15878  | -2.2128  |
| H | 4.85612  | 1.04061  | -2.02872 |
| C | -3.4696  | -2.07393 | -0.47018 |
| C | -2.66762 | -1.44936 | 0.49735  |
| C | -3.00333 | -1.56162 | 1.84043  |
| C | -4.16197 | -2.26296 | 2.19246  |
| C | -4.9573  | -2.85696 | 1.21454  |
| C | -4.61787 | -2.77716 | -0.13808 |
| C | -1.47399 | -0.81867 | -0.20114 |
| H | -2.37586 | -1.12887 | 2.61217  |
| H | -4.43679 | -2.34907 | 3.23837  |
| H | -5.85239 | -3.39848 | 1.50423  |
| H | -5.22336 | -3.24901 | -0.90464 |
| H | -3.3166  | -2.2013  | -2.59857 |
| S | -0.0544  | -1.92174 | 0.30202  |
| C | -1.78585 | -1.09044 | -1.68618 |
| O | -1.17286 | -0.69525 | -2.65434 |
| N | -2.91713 | -1.87095 | -1.72889 |
| C | 1.64038  | 1.45922  | -0.99093 |
| O | 2.06122  | 1.90017  | -2.03332 |
| S | 1.50324  | -1.83231 | -1.06484 |
| C | -3.27241 | 2.02642  | 0.73504  |
| C | -2.66611 | 1.41415  | -0.36686 |
| C | -3.23155 | 1.55185  | -1.62859 |
| C | -4.42354 | 2.27091  | -1.75584 |
| C | -5.02402 | 2.85462  | -0.64107 |
| C | -4.4526  | 2.74601  | 0.62806  |
| C | -1.39294 | 0.704    | 0.09683  |
| H | -2.75278 | 1.12277  | -2.50218 |
| H | -4.87908 | 2.38013  | -2.73404 |
| H | -5.94875 | 3.4106   | -0.75842 |
| H | -4.90678 | 3.20623  | 1.49883  |
| H | -2.75428 | 2.08485  | 2.81121  |
| S | -0.14901 | 1.77292  | -0.81889 |
| C | -1.42393 | 0.99523  | 1.63069  |
| O | -0.67612 | 0.57506  | 2.49045  |
| N | -2.51179 | 1.78344  | 1.87476  |

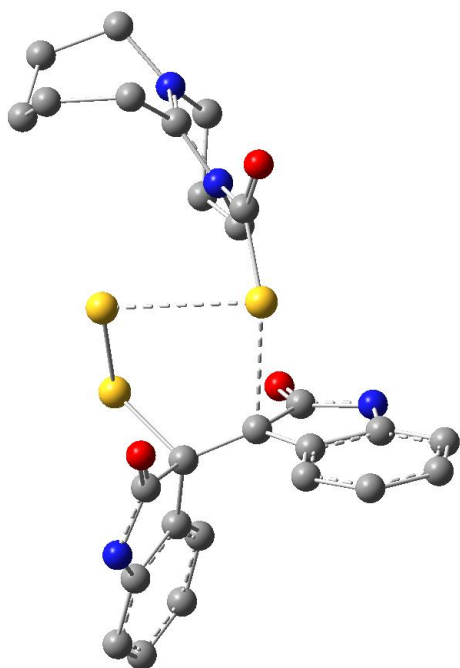

**TS16-17**

|   |          |          |          |
|---|----------|----------|----------|
| C | -3.98239 | -0.58438 | 0.04666  |
| C | -4.28275 | 0.19526  | 2.32466  |
| H | -4.93712 | 0.94514  | 2.76889  |
| H | -4.35527 | -0.72932 | 2.90693  |
| N | -4.77184 | -0.06062 | 0.9626   |
| N | -2.71738 | -0.93361 | 0.36617  |
| C | -2.84711 | 0.67581  | 2.23001  |
| H | -2.43829 | 0.86661  | 3.22394  |
| H | -2.81739 | 1.60957  | 1.6584   |
| C | -2.01465 | -0.38928 | 1.55043  |
| H | -1.80197 | -1.21922 | 2.23091  |
| H | -1.07163 | 0.03249  | 1.20383  |
| C | -6.08946 | 0.48428  | 0.5986   |
| H | -6.56506 | -0.19905 | -0.10587 |
| H | -6.69196 | 0.49095  | 1.50736  |
| C | -5.94698 | 1.88158  | -0.00503 |
| H | -5.75622 | 2.61287  | 0.78744  |
| H | -6.90614 | 2.13967  | -0.46591 |
| C | -4.82228 | 1.92866  | -1.04197 |
| H | -3.85035 | 1.98721  | -0.53696 |
| H | -4.91263 | 2.84419  | -1.63371 |
| C | -4.81412 | 0.72927  | -1.99424 |
| H | -4.06904 | 0.91962  | -2.77068 |
| H | -5.78505 | 0.65791  | -2.49514 |
| C | -4.49216 | -0.66699 | -1.37275 |
| H | -3.75515 | -1.16878 | -1.98967 |
| H | -5.38039 | -1.30414 | -1.36967 |
| C | 3.88294  | 2.23881  | -0.68819 |
| C | 3.03495  | 1.72612  | 0.30704  |
| C | 3.17562  | 2.15332  | 1.61984  |
| C | 4.18719  | 3.07052  | 1.92431  |



|   |          |          |          |
|---|----------|----------|----------|
| C | 5.0298   | 3.55854  | 0.92694  |
| C | 4.88755  | 3.15092  | -0.40126 |
| C | 2.04198  | 0.80247  | -0.36637 |
| H | 2.50951  | 1.78436  | 2.39097  |
| H | 4.31128  | 3.40759  | 2.94803  |
| H | 5.80875  | 4.27056  | 1.18086  |
| H | 5.53409  | 3.53111  | -1.18506 |
| H | 4.00511  | 1.90469  | -2.79796 |
| S | 0.44512  | 1.89019  | -0.36428 |
| C | 2.51155  | 0.7939   | -1.8271  |
| O | 2.04905  | 0.14064  | -2.74008 |
| N | 3.54281  | 1.69342  | -1.92255 |
| C | -2.00118 | -1.87364 | -0.451   |
| O | -2.6124  | -2.76867 | -0.99774 |
| S | -0.93983 | 0.97781  | -1.49333 |
| C | 2.47913  | -2.57691 | 1.07363  |
| C | 2.53999  | -1.75083 | -0.07802 |
| C | 3.17606  | -2.2516  | -1.22476 |
| C | 3.75024  | -3.51772 | -1.18579 |
| C | 3.68554  | -4.30394 | -0.02971 |
| C | 3.0445   | -3.84329 | 1.1183   |
| C | 1.84704  | -0.51952 | 0.24507  |
| H | 3.21223  | -1.6687  | -2.13553 |
| H | 4.24774  | -3.90386 | -2.06905 |
| H | 4.1384   | -5.29041 | -0.02504 |
| H | 2.98878  | -4.44413 | 2.01975  |
| H | 1.66145  | -2.25999 | 3.02086  |
| S | -0.24643 | -1.78756 | -0.52509 |
| C | 1.45121  | -0.63829 | 1.69424  |
| O | 0.91027  | 0.18622  | 2.41539  |
| N | 1.82727  | -1.90027 | 2.08998  |

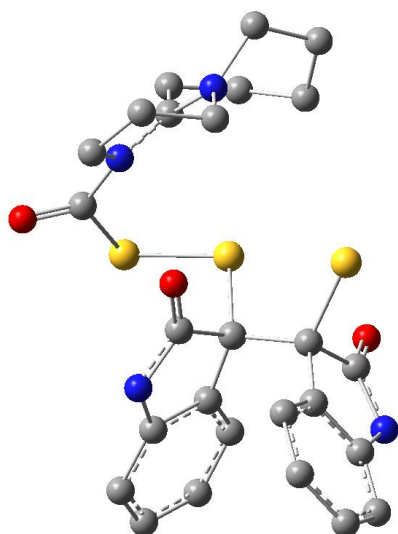

### INT18

|   |         |          |         |
|---|---------|----------|---------|
| C | 3.49297 | 0.27012  | 0.14162 |
| C | 3.06829 | -1.30657 | 1.87332 |
| H | 1.98425 | -1.28732 | 1.70264 |

|   |          |          |          |
|---|----------|----------|----------|
| H | 3.38986  | -2.3145  | 2.12976  |
| N | 3.72115  | -0.92812 | 0.61254  |
| N | 2.8607   | 1.16192  | 0.96102  |
| C | 3.48915  | -0.27444 | 2.91036  |
| H | 4.57637  | -0.30404 | 3.01959  |
| H | 3.04073  | -0.50203 | 3.87943  |
| C | 3.02029  | 1.10068  | 2.45152  |
| H | 3.72527  | 1.88525  | 2.73035  |
| H | 2.03863  | 1.33268  | 2.86004  |
| C | 4.71877  | -1.81488 | -0.01918 |
| H | 5.58649  | -1.2033  | -0.27522 |
| H | 5.03271  | -2.52217 | 0.74827  |
| C | 4.18119  | -2.53424 | -1.25787 |
| H | 3.64505  | -3.4387  | -0.95358 |
| H | 5.0485   | -2.85018 | -1.84657 |
| C | 3.23678  | -1.66193 | -2.08317 |
| H | 2.2797   | -1.6126  | -1.55523 |
| H | 3.03524  | -2.16031 | -3.0366  |
| C | 3.73003  | -0.24215 | -2.38955 |
| H | 2.95365  | 0.26209  | -2.97496 |
| H | 4.61763  | -0.28669 | -3.02786 |
| C | 4.08005  | 0.66642  | -1.18159 |
| H | 3.82897  | 1.7047   | -1.39448 |
| H | 5.16341  | 0.6588   | -1.00523 |
| C | -2.33672 | 2.05356  | 0.39078  |
| C | -1.99557 | 1.23851  | -0.69514 |
| C | -2.61947 | 1.43137  | -1.91978 |
| C | -3.59623 | 2.42651  | -2.02987 |
| C | -3.93472 | 3.21474  | -0.93068 |
| C | -3.30341 | 3.04333  | 0.30344  |
| C | -0.939   | 0.2508   | -0.2443  |
| H | -2.34514 | 0.82715  | -2.77864 |
| H | -4.0911  | 2.58771  | -2.98171 |
| H | -4.6953  | 3.98236  | -1.03339 |
| H | -3.55027 | 3.66147  | 1.15999  |
| H | -1.55911 | 2.19131  | 2.38414  |
| S | 0.61303  | 0.32485  | -1.23868 |
| C | -0.65458 | 0.71994  | 1.20589  |
| O | 0.197    | 0.30213  | 1.96666  |
| N | -1.54798 | 1.71162  | 1.49171  |
| C | 2.18003  | 2.31114  | 0.5364   |
| O | 2.19192  | 3.32386  | 1.18716  |
| S | 1.14688  | 2.3001   | -0.95384 |
| C | -3.75341 | -1.79046 | -0.11475 |
| C | -2.64613 | -1.4055  | 0.65281  |
| C | -2.77518 | -1.29949 | 2.02941  |
| C | -4.01923 | -1.55072 | 2.61858  |
| C | -5.11194 | -1.92171 | 1.8356   |
| C | -4.99312 | -2.05508 | 0.44969  |

|   |          |          |          |
|---|----------|----------|----------|
| C | -1.44435 | -1.23978 | -0.26043 |
| H | -1.91626 | -1.04377 | 2.64331  |
| H | -4.13128 | -1.46437 | 3.6945   |
| H | -6.07002 | -2.11847 | 2.30671  |
| H | -5.83549 | -2.35477 | -0.1652  |
| H | -3.99035 | -2.13127 | -2.21701 |
| S | -0.16021 | -2.50929 | 0.04276  |
| C | -2.06361 | -1.52215 | -1.64812 |
| O | -1.51466 | -1.44931 | -2.73208 |
| N | -3.37911 | -1.8613  | -1.4568  |

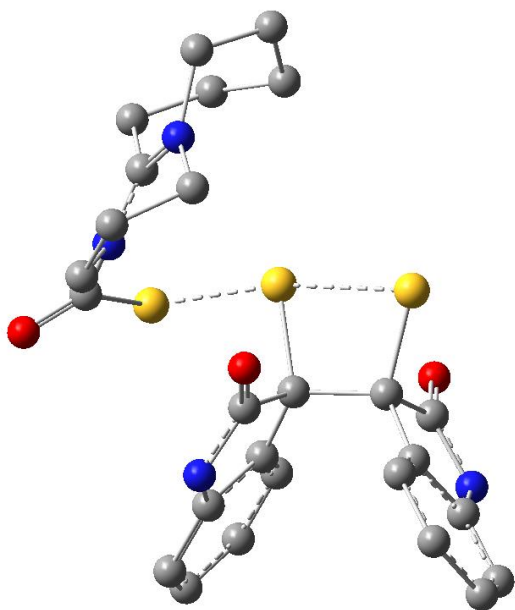

**TS18-19**

|   |         |          |          |
|---|---------|----------|----------|
| C | 3.52686 | 0.21802  | 0.24331  |
| C | 3.13601 | -1.46395 | 1.89568  |
| H | 2.07255 | -1.58254 | 1.66041  |
| H | 3.56684 | -2.42464 | 2.17136  |
| N | 3.81982 | -0.98511 | 0.68867  |
| N | 2.76635 | 1.03154  | 1.01274  |
| C | 3.33037 | -0.40656 | 2.97254  |
| H | 4.40069 | -0.28387 | 3.15913  |
| H | 2.85227 | -0.71431 | 3.90467  |
| C | 2.70289 | 0.89447  | 2.49866  |
| H | 3.20937 | 1.76373  | 2.91936  |
| H | 1.64638 | 0.93211  | 2.76588  |
| C | 4.90324 | -1.77948 | 0.0773   |
| H | 5.76368 | -1.12108 | -0.05502 |
| H | 5.1849  | -2.53136 | 0.81371  |
| C | 4.50952 | -2.43724 | -1.25387 |
| H | 4.10583 | -3.4355  | -1.06118 |
| H | 5.42684 | -2.56536 | -1.83767 |
| C | 3.47125 | -1.64079 | -2.04162 |
| H | 2.51732 | -1.70885 | -1.50822 |
| H | 3.3137  | -2.12349 | -3.01103 |
| C | 3.8099  | -0.16653 | -2.28818 |
| H | 2.95382 | 0.30336  | -2.78436 |

|   |          |          |          |
|---|----------|----------|----------|
| H | 4.65661  | -0.09065 | -2.97724 |
| C | 4.16127  | 0.67584  | -1.04001 |
| H | 3.93061  | 1.72513  | -1.21175 |
| H | 5.23978  | 0.62755  | -0.85017 |
| C | -1.93645 | 2.07129  | 0.80493  |
| C | -1.7863  | 1.45255  | -0.44247 |
| C | -2.31151 | 2.06574  | -1.57167 |
| C | -3.00478 | 3.27179  | -1.428   |
| C | -3.1631  | 3.85673  | -0.17266 |
| C | -2.62279 | 3.26397  | 0.9706   |
| C | -1.00991 | 0.1692   | -0.2508  |
| H | -2.17409 | 1.62301  | -2.55163 |
| H | -3.41816 | 3.75802  | -2.30535 |
| H | -3.70472 | 4.7927   | -0.07851 |
| H | -2.7233  | 3.71952  | 1.94995  |
| H | -1.1954  | 1.58339  | 2.75687  |
| S | 0.5696   | -0.05731 | -1.20027 |
| C | -0.65865 | 0.22084  | 1.26225  |
| O | 0.03562  | -0.55453 | 1.89227  |
| N | -1.27142 | 1.32377  | 1.78046  |
| C | 2.10568  | 2.21108  | 0.5367   |
| O | 2.09584  | 3.19035  | 1.24472  |
| S | 1.22511  | 2.16321  | -0.99883 |
| C | -4.09004 | -1.49293 | -0.21    |
| C | -2.8271  | -1.56015 | 0.39443  |
| C | -2.72306 | -2.00078 | 1.70585  |
| C | -3.88783 | -2.33586 | 2.40536  |
| C | -5.13574 | -2.24208 | 1.79132  |
| C | -5.2564  | -1.82277 | 0.46416  |
| C | -1.7794  | -1.14272 | -0.61621 |
| H | -1.75008 | -2.08957 | 2.17681  |
| H | -3.81642 | -2.67848 | 3.43238  |
| H | -6.03044 | -2.50775 | 2.34582  |
| H | -6.2217  | -1.76378 | -0.02757 |
| H | -4.70497 | -1.03815 | -2.20953 |
| S | -0.46282 | -2.35329 | -0.99645 |
| C | -2.63693 | -0.91317 | -1.89182 |
| O | -2.24815 | -0.63476 | -3.00742 |
| N | -3.94913 | -1.08712 | -1.53751 |

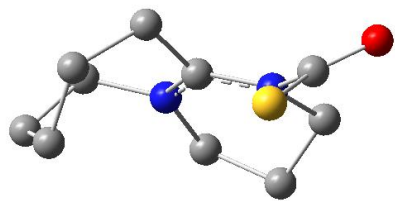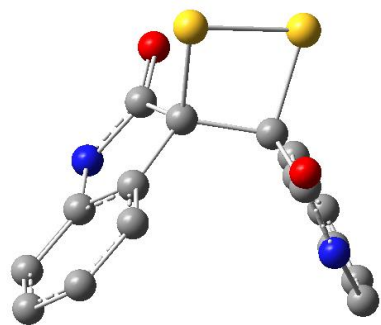

**INT19**

|   |          |          |          |
|---|----------|----------|----------|
| C | -4.57584 | 2.85205  | 1.19981  |
| C | -4.80752 | 3.32944  | -0.08918 |
| C | -3.97481 | 2.97598  | -1.15429 |
| C | -2.91759 | 2.12464  | -0.87792 |
| C | -2.68373 | 1.61193  | 0.40587  |
| C | -3.50607 | 1.98887  | 1.45813  |
| C | -0.97883 | 0.92576  | -1.11597 |
| C | -1.48356 | 0.70766  | 0.33957  |
| O | 0.05882  | 0.51796  | -1.60102 |
| H | -5.22707 | 3.15529  | 2.01248  |
| H | -5.64306 | 3.99764  | -0.27238 |
| H | -4.13772 | 3.35923  | -2.15582 |
| H | -3.31822 | 1.62155  | 2.46084  |
| N | -1.92579 | 1.66972  | -1.75407 |
| H | -1.81803 | 1.98325  | -2.7116  |
| S | -0.09412 | 0.95864  | 1.53024  |
| C | -2.42949 | -2.85714 | -2.57051 |
| C | -3.6851  | -3.32357 | -2.18494 |
| C | -4.23188 | -2.98998 | -0.94348 |
| C | -3.47931 | -2.17284 | -0.11528 |
| C | -2.22148 | -1.67815 | -0.49088 |
| C | -1.68608 | -2.03015 | -1.72244 |
| C | -2.77561 | -1.01784 | 1.73649  |
| C | -1.70257 | -0.81641 | 0.62874  |
| O | -2.72755 | -0.62009 | 2.8803   |
| H | -2.02156 | -3.13967 | -3.53503 |
| H | -4.24919 | -3.96464 | -2.85506 |
| H | -5.20237 | -3.36015 | -0.63105 |
| H | -0.7091  | -1.6686  | -2.02329 |
| N | -3.79258 | -1.73567 | 1.17399  |
| H | -4.60179 | -2.03849 | 1.70299  |
| S | -0.01304 | -1.14599 | 1.31639  |
| C | 3.8302   | 0.04379  | -0.32937 |

|   |         |          |          |
|---|---------|----------|----------|
| C | 2.89816 | -0.84638 | -2.44452 |
| H | 2.1528  | -0.30062 | -3.02965 |
| H | 3.61947 | -1.29993 | -3.13257 |
| N | 3.62184 | 0.14882  | -1.63734 |
| N | 3.53249 | -1.08255 | 0.32101  |
| C | 2.23097 | -1.88107 | -1.56508 |
| H | 1.95596 | -2.75171 | -2.16497 |
| H | 1.33002 | -1.45337 | -1.11922 |
| C | 3.17961 | -2.28507 | -0.45254 |
| H | 4.09432 | -2.73969 | -0.84837 |
| H | 2.71554 | -2.99008 | 0.23551  |
| C | 4.00183 | 1.37135  | -2.36106 |
| H | 5.00956 | 1.66529  | -2.06456 |
| H | 4.04561 | 1.10548  | -3.41877 |
| C | 3.00682 | 2.5102   | -2.11765 |
| H | 2.11832 | 2.36125  | -2.74036 |
| H | 3.48554 | 3.43953  | -2.44511 |
| C | 2.57294 | 2.60266  | -0.65378 |
| H | 1.85764 | 1.79876  | -0.44856 |
| H | 2.02801 | 3.54011  | -0.49925 |
| C | 3.7127  | 2.51991  | 0.36518  |
| H | 3.28068 | 2.62791  | 1.36445  |
| H | 4.41223 | 3.34954  | 0.21858  |
| C | 4.52039 | 1.19827  | 0.35106  |
| H | 4.77828 | 0.90812  | 1.36557  |
| H | 5.46211 | 1.32901  | -0.19049 |
| C | 3.62076 | -1.29765 | 1.78936  |
| O | 4.15392 | -2.34595 | 2.09753  |
| S | 2.85963 | -0.14705 | 2.82051  |

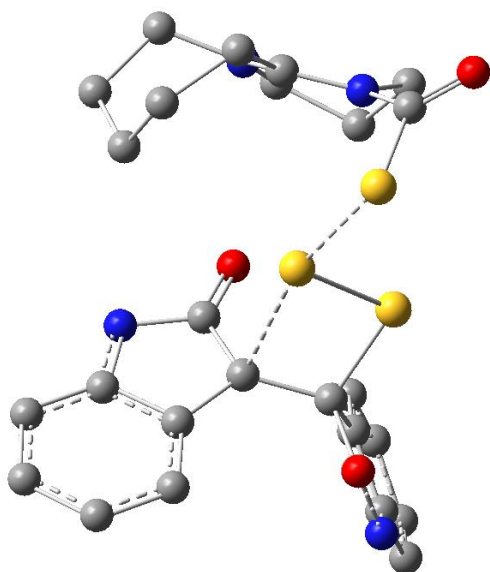

**TS19-17**

|   |          |         |          |
|---|----------|---------|----------|
| C | -3.3017  | 3.83373 | 1.13832  |
| C | -2.76742 | 4.69027 | 0.17395  |
| C | -1.88346 | 4.19848 | -0.78804 |
| C | -1.56319 | 2.84886 | -0.74928 |

|   |          |          |          |
|---|----------|----------|----------|
| C | -2.077   | 1.95254  | 0.22903  |
| C | -2.96314 | 2.47898  | 1.17847  |
| C | -0.6768  | 0.79555  | -1.24546 |
| C | -1.45918 | 0.65514  | -0.02485 |
| O | -0.00891 | -0.0334  | -1.88364 |
| H | -3.991   | 4.22577  | 1.88029  |
| H | -3.03966 | 5.74103  | 0.16696  |
| H | -1.46033 | 4.8431   | -1.55274 |
| H | -3.38397 | 1.85296  | 1.95481  |
| N | -0.74148 | 2.13618  | -1.60068 |
| H | -0.22319 | 2.52043  | -2.3789  |
| S | 0.50503  | 0.26861  | 1.41959  |
| C | -3.29153 | -2.75966 | -2.55835 |
| C | -4.56673 | -2.98171 | -2.04036 |
| C | -4.93193 | -2.49351 | -0.78272 |
| C | -3.97674 | -1.78043 | -0.07495 |
| C | -2.69442 | -1.53701 | -0.58468 |
| C | -2.34151 | -2.03385 | -1.83043 |
| C | -2.92141 | -0.63322 | 1.61168  |
| C | -1.92756 | -0.70815 | 0.42365  |
| O | -2.70997 | -0.16707 | 2.71208  |
| H | -3.03148 | -3.15472 | -3.53496 |
| H | -5.29155 | -3.54683 | -2.61812 |
| H | -5.91978 | -2.66884 | -0.36989 |
| H | -1.34859 | -1.84192 | -2.22206 |
| N | -4.08909 | -1.21344 | 1.19819  |
| H | -4.88419 | -1.33411 | 1.81393  |
| S | -0.41751 | -1.5969  | 1.03963  |
| C | 3.49413  | -0.24913 | -0.17394 |
| C | 2.85655  | -1.11249 | -2.40069 |
| H | 2.13801  | -0.56195 | -3.0128  |
| H | 3.66632  | -1.48554 | -3.03517 |
| N | 3.45949  | -0.1264  | -1.48259 |
| N | 3.14519  | -1.42036 | 0.40251  |
| C | 2.16295  | -2.23031 | -1.64916 |
| H | 2.03869  | -3.08806 | -2.3139  |
| H | 1.18129  | -1.88569 | -1.31425 |
| C | 2.99825  | -2.62266 | -0.446   |
| H | 3.99412  | -2.97473 | -0.73315 |
| H | 2.5109   | -3.38983 | 0.15494  |
| C | 4.02246  | 1.07087  | -2.1359  |
| H | 4.99854  | 1.27576  | -1.69324 |
| H | 4.19125  | 0.79678  | -3.17813 |
| C | 3.10473  | 2.29259  | -2.02873 |
| H | 2.3397   | 2.24613  | -2.81136 |
| H | 3.71896  | 3.17728  | -2.22625 |
| C | 2.41088  | 2.38992  | -0.67168 |
| H | 1.6401   | 1.61632  | -0.63531 |
| H | 1.89125  | 3.35067  | -0.59647 |

|   |         |          |         |
|---|---------|----------|---------|
| C | 3.31907 | 2.22351  | 0.54811 |
| H | 2.70056 | 2.32099  | 1.44689 |
| H | 4.0605  | 3.02742  | 0.58589 |
| C | 4.07884 | 0.87704  | 0.63663 |
| H | 4.17904 | 0.56652  | 1.67445 |
| H | 5.10145 | 0.99088  | 0.26206 |
| C | 3.06614 | -1.64252 | 1.81126 |
| O | 3.63503 | -2.58669 | 2.29541 |
| S | 2.00331 | -0.61492 | 2.80819 |

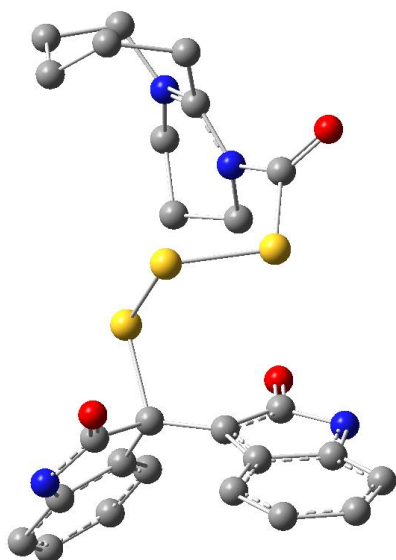

### INT 17

|   |         |          |          |
|---|---------|----------|----------|
| C | 4.02314 | 0.66575  | 0.31652  |
| C | 4.20727 | -1.32195 | 1.74385  |
| H | 4.61405 | -2.29935 | 1.47811  |
| H | 4.60142 | -1.03375 | 2.72303  |
| N | 4.71642 | -0.36476 | 0.7437   |
| N | 2.79174 | 0.9212   | 0.80993  |
| C | 2.69264 | -1.33628 | 1.72718  |
| H | 2.31972 | -1.93966 | 2.55699  |
| H | 2.33527 | -1.77884 | 0.79263  |
| C | 2.17054 | 0.07734  | 1.86438  |
| H | 2.44675 | 0.50413  | 2.83479  |
| H | 1.08213 | 0.12513  | 1.75351  |
| C | 5.99927 | -0.71042 | 0.10594  |
| H | 6.56162 | 0.20734  | -0.06807 |
| H | 6.5585  | -1.30581 | 0.82868  |
| C | 5.7648  | -1.46971 | -1.20053 |
| H | 5.49891 | -2.50959 | -0.98587 |
| H | 6.71308 | -1.47974 | -1.74754 |
| C | 4.66688 | -0.81659 | -2.04373 |
| H | 3.68285 | -1.08009 | -1.63503 |
| H | 4.69447 | -1.22974 | -3.05579 |
| C | 4.78515 | 0.70778  | -2.13549 |
| H | 4.04373 | 1.06538  | -2.85353 |
| H | 5.7699  | 0.97212  | -2.53269 |
| C | 4.5744  | 1.5028   | -0.80951 |



|   |          |          |          |
|---|----------|----------|----------|
| H | 3.90492  | 2.33828  | -0.99994 |
| H | 5.51436  | 1.93722  | -0.4588  |
| C | -2.86057 | -3.06316 | -0.67069 |
| C | -2.25453 | -2.21338 | 0.26475  |
| C | -2.01331 | -2.65898 | 1.55619  |
| C | -2.40098 | -3.95949 | 1.89809  |
| C | -3.01006 | -4.79016 | 0.95771  |
| C | -3.2514  | -4.35409 | -0.34831 |
| C | -1.97101 | -0.88556 | -0.40336 |
| H | -1.53633 | -1.98913 | 2.2651   |
| H | -2.22406 | -4.32625 | 2.90397  |
| H | -3.30311 | -5.79679 | 1.23968  |
| H | -3.72357 | -4.99732 | -1.08341 |
| H | -3.35707 | -2.80216 | -2.73924 |
| S | -0.0547  | -0.96617 | -0.61373 |
| C | -2.49543 | -1.11547 | -1.83684 |
| O | -2.44897 | -0.33697 | -2.76833 |
| N | -2.986   | -2.39435 | -1.88991 |
| C | 2.21275  | 2.21963  | 0.65189  |
| O | 2.78582  | 3.22422  | 0.9703   |
| S | 0.43576  | 0.83205  | -1.4354  |
| C | -3.46748 | 2.29012  | 0.93744  |
| C | -3.41566 | 1.32739  | -0.12044 |
| C | -4.30468 | 1.51555  | -1.19352 |
| C | -5.16847 | 2.61192  | -1.20318 |
| C | -5.18532 | 3.54169  | -0.15922 |
| C | -4.3257  | 3.38109  | 0.93005  |
| C | -2.42845 | 0.34858  | 0.26322  |
| H | -4.31889 | 0.82108  | -2.02468 |
| H | -5.84396 | 2.74094  | -2.04453 |
| H | -5.86566 | 4.38705  | -0.19027 |
| H | -4.3252  | 4.08439  | 1.75832  |
| H | -2.35348 | 2.40716  | 2.75266  |
| S | 0.52396  | 2.2899   | 0.05694  |
| C | -1.9084  | 0.72444  | 1.53821  |
| O | -1.02901 | 0.19741  | 2.25893  |
| N | -2.55725 | 1.90864  | 1.8986   |

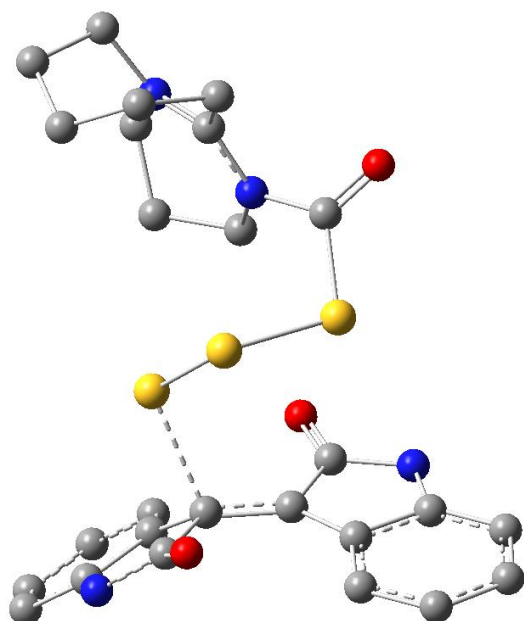

**TS17-isoindigo**

|   |          |          |          |
|---|----------|----------|----------|
| C | 3.91017  | -0.66691 | -0.32641 |
| C | 4.14952  | 1.30925  | -1.75816 |
| H | 4.60051  | 2.27095  | -1.50709 |
| H | 4.51363  | 0.99872  | -2.74228 |
| N | 4.63566  | 0.33885  | -0.76006 |
| N | 2.66777  | -0.88187 | -0.80939 |
| C | 2.63736  | 1.38519  | -1.71352 |
| H | 2.27348  | 2.00354  | -2.53629 |
| H | 2.31216  | 1.83627  | -0.7714  |
| C | 2.05421  | -0.00533 | -1.84038 |
| H | 2.27719  | -0.43881 | -2.82135 |
| H | 0.97084  | -0.00233 | -1.69136 |
| C | 5.93445  | 0.64055  | -0.13301 |
| H | 6.46466  | -0.29649 | 0.03982  |
| H | 6.50941  | 1.21362  | -0.8615  |
| C | 5.73729  | 1.41063  | 1.17309  |
| H | 5.50268  | 2.45794  | 0.95793  |
| H | 6.69056  | 1.3916   | 1.71118  |
| C | 4.62716  | 0.79422  | 2.02766  |
| H | 3.64829  | 1.08991  | 1.62894  |
| H | 4.6785   | 1.20605  | 3.03934  |
| C | 4.69675  | -0.73318 | 2.11832  |
| H | 3.95386  | -1.06624 | 2.84658  |
| H | 5.67761  | -1.02934 | 2.50263  |
| C | 4.44202  | -1.52176 | 0.79612  |
| H | 3.74303  | -2.33036 | 0.99604  |
| H | 5.36114  | -1.99271 | 0.43722  |
| C | -2.83057 | 3.1478   | 0.72462  |
| C | -2.3832  | 2.27474  | -0.28461 |
| C | -2.17451 | 2.77488  | -1.56566 |
| C | -2.42754 | 4.12719  | -1.81654 |
| C | -2.87262 | 4.97314  | -0.80123 |

|   |          |          |          |
|---|----------|----------|----------|
| C | -3.08098 | 4.49218  | 0.49287  |
| C | -2.23401 | 0.91468  | 0.32507  |
| H | -1.81049 | 2.11218  | -2.341   |
| H | -2.26856 | 4.52311  | -2.81444 |
| H | -3.05963 | 6.02119  | -1.01404 |
| H | -3.4282  | 5.13916  | 1.29172  |
| H | -3.2345  | 2.85815  | 2.80572  |
| S | -0.05103 | 1.0895   | 0.7431   |
| C | -2.65566 | 1.11956  | 1.78164  |
| O | -2.67753 | 0.3006   | 2.68093  |
| N | -2.97536 | 2.44692  | 1.91826  |
| C | 2.05128  | -2.16582 | -0.6532  |
| O | 2.60342  | -3.18235 | -0.97291 |
| S | 0.35934  | -0.75047 | 1.48276  |
| C | -3.16193 | -2.43144 | -0.99831 |
| C | -3.23652 | -1.51086 | 0.08573  |
| C | -3.99196 | -1.90112 | 1.20119  |
| C | -4.60294 | -3.15614 | 1.22695  |
| C | -4.49171 | -4.04446 | 0.15482  |
| C | -3.76748 | -3.68053 | -0.98109 |
| C | -2.52102 | -0.31087 | -0.33669 |
| H | -4.08969 | -1.24032 | 2.05176  |
| H | -5.17495 | -3.44454 | 2.10415  |
| H | -4.97126 | -5.01735 | 0.19921  |
| H | -3.67649 | -4.34688 | -1.83384 |
| H | -2.12235 | -2.31654 | -2.85783 |
| S | 0.36284  | -2.17998 | -0.05786 |
| C | -1.98488 | -0.58624 | -1.65776 |
| O | -1.21437 | 0.07948  | -2.36894 |
| N | -2.42923 | -1.85006 | -2.01586 |

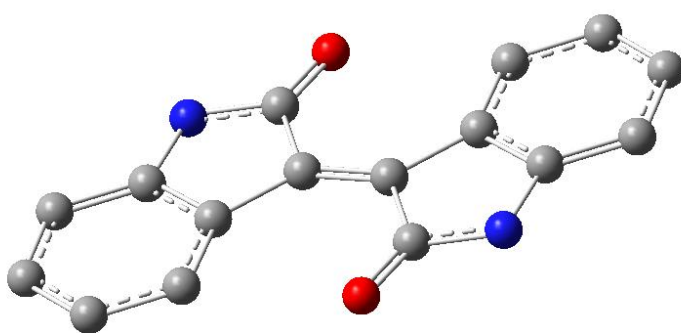

**Isoindigo**

|   |          |          |          |
|---|----------|----------|----------|
| H | -2.04603 | 2.3482   | -0.00002 |
| H | -4.82806 | -1.78486 | 0.00001  |
| H | -5.90302 | 0.47503  | -0.00001 |
| H | -4.49161 | 2.51098  | -0.00002 |
| O | 0.10955  | -2.68947 | 0.00001  |
| C | -0.60878 | -0.3097  | 0.00000  |
| C | -0.75183 | -1.83029 | 0.00000  |
| C | -2.63312 | 1.44603  | -0.00001 |
| C | -2.00657 | 0.19282  | 0.00000  |

|   |          |          |          |
|---|----------|----------|----------|
| C | -2.85099 | -0.94308 | 0.00000  |
| C | -4.23418 | -0.87707 | 0.00000  |
| C | -4.82111 | 0.387    | -0.00001 |
| C | -4.02615 | 1.53102  | -0.00001 |
| N | -2.08854 | -2.09983 | 0.00001  |
| H | -2.45526 | -3.04308 | 0.00002  |
| H | 2.04601  | -2.3482  | -0.00001 |
| H | 4.82808  | 1.78484  | 0.00000  |
| H | 5.903    | -0.47505 | -0.00001 |
| H | 4.4916   | -2.51098 | -0.00001 |
| O | -0.10953 | 2.68947  | 0.00001  |
| C | 0.60879  | 0.3097   | 0.00000  |
| C | 0.75185  | 1.8303   | 0.00001  |
| C | 2.6331   | -1.44604 | -0.00001 |
| C | 2.00657  | -0.19282 | 0.00000  |
| C | 2.85099  | 0.94308  | 0.00000  |
| C | 4.23418  | 0.87707  | 0.00000  |
| C | 4.82109  | -0.38701 | -0.00001 |
| C | 4.02613  | -1.53103 | -0.00001 |
| N | 2.08855  | 2.09982  | 0.00001  |
| H | 2.45528  | 3.04307  | 0.00001  |
